# Supplementary material for: Isolation of a methyl-reducing methanogen outside the Euryarchaeota
Source: Research Square preprint supplement (doi:10.21203/rs.3.rs-2501667/v1), 2023-02-14
Supplement: Supplementary file 1 [file 0cc1e115079ce085da28a08e.xlsx]

## Sheet: Table information
Supplementary Tables information
Supplementary Table 1. Genome annotation of Verstraetearchaeum methanopetracarbonis LWZ-6.
Supplementary Table 2. Transcriptome of Verstraetearchaeum methanopetracarbonis LWZ-6 grown on methanol and hydrogen.
Supplementary Table 3. General information on the 23 Verstraetearchaeales genomes obtained in our study.
Supplementary Table 4. Methanogenetic features and energy mechanism of 5 Verstraetearchaeales clusters in our study, other Verstraetearchaeales, Ca. Nezhaarchaeales and Ca. Culexarchaeales genomes and other hydrogen-dependent methylotrophic methanogens in Euryarchaeota. 1: Present, 0: Absent.
Supplementary Table 5. Global distribution of 16S rRNA gene sequences and MAGs of Verstraetearchaeales in different biotopes.
Supplementary Table 6. Primers and probes used in this study.
Supplementary Table 7. Summary of sequencing data submitted to The National Omics Data Encyclopedia (NODE).

## Sheet: Supplementary Table 1
Supplemetary Table 1. Genome annotation of Verstraetearchaeum methanopetracarbonis LWZ-6.
Gene_ID	Strand	Start	End	length	Gene_name	Feature	KO	Description
NODE_1_length_1538194_cov_1083.054483_1	-	3	2372	2370		CDS
NODE_1_length_1538194_cov_1083.054483_2	-	2499	3323	825	ABC-2.P	CDS	K01992	ABC-2 type transport system permease protein
NODE_1_length_1538194_cov_1083.054483_3	-	3320	3793	474	ABC-2.A	CDS	K01990	ABC-2 type transport system ATP-binding protein
NODE_1_length_1538194_cov_1083.054483_4	-	3732	4259	528	ABC-2.A	CDS	K01990	ABC-2 type transport system ATP-binding protein
NODE_1_length_1538194_cov_1083.054483_5	+	4496	5803	1308		CDS
NODE_1_length_1538194_cov_1083.054483_6	+	5891	6964	1074	wecB	CDS	K01791	UDP-N-acetylglucosamine 2-epimerase (non-hydrolysing) [EC:5.1.3.14]
NODE_1_length_1538194_cov_1083.054483_7	-	7054	7983	930	galE, GALE	CDS	K01784	UDP-glucose 4-epimerase [EC:5.1.3.2]
NODE_1_length_1538194_cov_1083.054483_8	-	8024	10534	2511	ATP2C	CDS	K01537	P-type Ca2+ transporter type 2C [EC:7.2.2.10]
NODE_1_length_1538194_cov_1083.054483_9	+	10689	11585	897		CDS
NODE_1_length_1538194_cov_1083.054483_10	+	11610	12608	999		CDS
NODE_1_length_1538194_cov_1083.054483_11	-	12876	14438	1563	TC.SSS	CDS	K03307	solute:Na+ symporter, SSS family
NODE_1_length_1538194_cov_1083.054483_12	-	14440	14622	183		CDS
NODE_1_length_1538194_cov_1083.054483_13	+	14958	15431	474		CDS
NODE_1_length_1538194_cov_1083.054483_14	+	15632	17581	1950		CDS
NODE_1_length_1538194_cov_1083.054483_15	+	17738	18118	381		CDS
NODE_1_length_1538194_cov_1083.054483_16	+	18115	18591	477		CDS
NODE_1_length_1538194_cov_1083.054483_17	+	18646	19128	483		CDS
NODE_1_length_1538194_cov_1083.054483_18	+	19166	20668	1503	K06921	CDS	K06921	uncharacterized protein
NODE_1_length_1538194_cov_1083.054483_19	+	20682	21440	759		CDS
NODE_1_length_1538194_cov_1083.054483_20	+	21433	22203	771		CDS
NODE_1_length_1538194_cov_1083.054483_21	+	22232	22537	306		CDS
NODE_1_length_1538194_cov_1083.054483_22	+	22623	24599	1977		CDS
NODE_1_length_1538194_cov_1083.054483_23	+	24596	25714	1119		CDS
NODE_1_length_1538194_cov_1083.054483_24	+	25762	26733	972	moxR	CDS	K03924	MoxR-like ATPase [EC:3.6.3.-]
NODE_1_length_1538194_cov_1083.054483_25	+	26730	28409	1680		CDS
NODE_1_length_1538194_cov_1083.054483_26	+	28423	29394	972		CDS
NODE_1_length_1538194_cov_1083.054483_27	+	29429	30610	1182	wecC	CDS	K02472	UDP-N-acetyl-D-mannosaminuronic acid dehydrogenase [EC:1.1.1.336]
NODE_1_length_1538194_cov_1083.054483_28	+	30663	31355	693		CDS
NODE_1_length_1538194_cov_1083.054483_29	+	31801	32484	684	K09726	CDS	K09726	uncharacterized protein
NODE_1_length_1538194_cov_1083.054483_30	+	32501	33565	1065	wbpI, wlbD	CDS	K13019	UDP-GlcNAc3NAcA epimerase [EC:5.1.3.23]
NODE_1_length_1538194_cov_1083.054483_31	+	33747	34952	1206		CDS
NODE_1_length_1538194_cov_1083.054483_32	+	35201	36034	834		CDS
NODE_1_length_1538194_cov_1083.054483_33	+	36036	36731	696		CDS
NODE_1_length_1538194_cov_1083.054483_34	+	36747	37847	1101	per, rfbE	CDS	K13010	perosamine synthetase [EC:2.6.1.102]
NODE_1_length_1538194_cov_1083.054483_35	+	37870	38745	876		CDS
NODE_1_length_1538194_cov_1083.054483_36	+	38855	39604	750		CDS
NODE_1_length_1538194_cov_1083.054483_37	+	39738	40718	981		CDS
NODE_1_length_1538194_cov_1083.054483_38	+	40955	41818	864		CDS
NODE_1_length_1538194_cov_1083.054483_39	+	42336	42437	102		CDS
NODE_1_length_1538194_cov_1083.054483_40	+	42434	42613	180		CDS
NODE_1_length_1538194_cov_1083.054483_41	+	42707	43087	381		CDS
NODE_1_length_1538194_cov_1083.054483_42	+	43567	44625	1059	rfbA, rmlA, rffH	CDS	K00973	glucose-1-phosphate thymidylyltransferase [EC:2.7.7.24]
NODE_1_length_1538194_cov_1083.054483_43	+	44655	45593	939	rfbD, rmlD	CDS	K00067	dTDP-4-dehydrorhamnose reductase [EC:1.1.1.133]
NODE_1_length_1538194_cov_1083.054483_44	+	45594	46097	504	rfbC, rmlC	CDS	K01790	dTDP-4-dehydrorhamnose 3,5-epimerase [EC:5.1.3.13]
NODE_1_length_1538194_cov_1083.054483_45	+	46094	47113	1020	rfbB, rmlB, rffG	CDS	K01710	dTDP-glucose 4,6-dehydratase [EC:4.2.1.46]
NODE_1_length_1538194_cov_1083.054483_46	+	47534	48571	1038		CDS
NODE_1_length_1538194_cov_1083.054483_47	+	48636	49778	1143		CDS
NODE_1_length_1538194_cov_1083.054483_48	+	49756	50577	822		CDS
NODE_1_length_1538194_cov_1083.054483_49	+	51217	51921	705		CDS
NODE_1_length_1538194_cov_1083.054483_50	+	52201	57318	5118	bapA	CDS	K20276	large repetitive protein
NODE_1_length_1538194_cov_1083.054483_51	+	57640	58191	552	NTPCR	CDS	K06928	nucleoside-triphosphatase [EC:3.6.1.15]
NODE_1_length_1538194_cov_1083.054483_52	-	58419	59048	630		CDS
NODE_1_length_1538194_cov_1083.054483_53	-	59049	59624	576		CDS
NODE_1_length_1538194_cov_1083.054483_54	+	60026	60910	885		CDS
NODE_1_length_1538194_cov_1083.054483_55	-	61202	62542	1341	K07133	CDS	K07133	uncharacterized protein
NODE_1_length_1538194_cov_1083.054483_56	+	63488	64882	1395		CDS
NODE_1_length_1538194_cov_1083.054483_57	+	65450	65770	321		CDS
NODE_1_length_1538194_cov_1083.054483_58	-	66042	66344	303		CDS
NODE_1_length_1538194_cov_1083.054483_59	+	66465	66887	423		CDS
NODE_1_length_1538194_cov_1083.054483_60	-	66968	67609	642	iorB	CDS	K00180	indolepyruvate ferredoxin oxidoreductase, beta subunit [EC:1.2.7.8]
NODE_1_length_1538194_cov_1083.054483_61	+	67910	69373	1464		CDS
NODE_1_length_1538194_cov_1083.054483_62	-	69448	70434	987		CDS
NODE_1_length_1538194_cov_1083.054483_63	-	70606	71379	774	npdA	CDS	K12410	NAD-dependent deacetylase [EC:2.3.1.286]
NODE_1_length_1538194_cov_1083.054483_64	+	71440	72324	885	rfbD, rmlD	CDS	K00067	dTDP-4-dehydrorhamnose reductase [EC:1.1.1.133]
NODE_1_length_1538194_cov_1083.054483_65	+	72436	73593	1158		CDS
NODE_1_length_1538194_cov_1083.054483_66	+	73586	74083	498		CDS
NODE_1_length_1538194_cov_1083.054483_67	+	74397	75344	948	pyrB, PYR2	CDS	K00609	aspartate carbamoyltransferase catalytic subunit [EC:2.1.3.2]
NODE_1_length_1538194_cov_1083.054483_68	+	75341	75814	474	pyrI	CDS	K00610	aspartate carbamoyltransferase regulatory subunit
NODE_1_length_1538194_cov_1083.054483_69	+	75824	77152	1329	URA4, pyrC	CDS	K01465	dihydroorotase [EC:3.5.2.3]
NODE_1_length_1538194_cov_1083.054483_70	+	77142	78782	1641	pyrDI	CDS	K17828	dihydroorotate dehydrogenase (NAD+) catalytic subunit [EC:1.3.1.14]
NODE_1_length_1538194_cov_1083.054483_71	+	78916	79581	666	pyrE	CDS	K00762	orotate phosphoribosyltransferase [EC:2.4.2.10]
NODE_1_length_1538194_cov_1083.054483_72	+	79578	80285	708	pyrF	CDS	K01591	orotidine-5'-phosphate decarboxylase [EC:4.1.1.23]
NODE_1_length_1538194_cov_1083.054483_73	+	80432	80932	501		CDS
NODE_1_length_1538194_cov_1083.054483_74	+	81294	82490	1197		CDS
NODE_1_length_1538194_cov_1083.054483_75	+	82844	83083	240	rpoH	CDS	K03053	DNA-directed RNA polymerase subunit H [EC:2.7.7.6]
NODE_1_length_1538194_cov_1083.054483_76	+	83089	86418	3330	rpoB	CDS	K13798	DNA-directed RNA polymerase subunit B [EC:2.7.7.6]
NODE_1_length_1538194_cov_1083.054483_77	+	86421	89078	2658	rpoA1	CDS	K03041	DNA-directed RNA polymerase subunit A' [EC:2.7.7.6]
NODE_1_length_1538194_cov_1083.054483_78	+	89080	90474	1395	rpoA2	CDS	K03042	DNA-directed RNA polymerase subunit A" [EC:2.7.7.6]
NODE_1_length_1538194_cov_1083.054483_79	+	90476	90772	297	RP-L30e, RPL30	CDS	K02908	large subunit ribosomal protein L30e
NODE_1_length_1538194_cov_1083.054483_80	+	90807	91211	405	nusA	CDS	K02600	transcription termination/antitermination protein NusA
NODE_1_length_1538194_cov_1083.054483_81	+	91277	91720	444	RP-S12, MRPS12, rpsL	CDS	K02950	small subunit ribosomal protein S12
NODE_1_length_1538194_cov_1083.054483_82	+	91728	92300	573	RP-S7, MRPS7, rpsG	CDS	K02992	small subunit ribosomal protein S7
NODE_1_length_1538194_cov_1083.054483_83	+	92399	93709	1311	EEF1A	CDS	K03231	elongation factor 1-alpha
NODE_1_length_1538194_cov_1083.054483_84	+	93760	94047	288	RP-S10, MRPS10, rpsJ	CDS	K02946	small subunit ribosomal protein S10
NODE_1_length_1538194_cov_1083.054483_85	+	94321	95064	744		CDS
NODE_1_length_1538194_cov_1083.054483_86	+	95075	95977	903	uvsE, UVE1	CDS	K13281	UV DNA damage endonuclease [EC:3.-.-.-]
NODE_1_length_1538194_cov_1083.054483_87	+	96143	96412	270		CDS
NODE_1_length_1538194_cov_1083.054483_88	+	97015	97434	420	ZBTB8OS	CDS	K24956	protein archease
NODE_1_length_1538194_cov_1083.054483_89	+	97528	98988	1461	RTCB, rtcB	CDS	K14415	tRNA-splicing ligase RtcB (3'-phosphate/5'-hydroxy nucleic acid ligase) [EC:6.5.1.8]
NODE_1_length_1538194_cov_1083.054483_90	+	99008	99664	657	gloB, gloC, HAGH	CDS	K01069	hydroxyacylglutathione hydrolase [EC:3.1.2.6]
NODE_1_length_1538194_cov_1083.054483_91	-	99675	100613	939	TC.PIT	CDS	K03306	inorganic phosphate transporter, PiT family
NODE_1_length_1538194_cov_1083.054483_92	-	100624	101295	672	K07220	CDS	K07220	uncharacterized protein
NODE_1_length_1538194_cov_1083.054483_93	-	101296	103728	2433	VARS, valS	CDS	K01873	valyl-tRNA synthetase [EC:6.1.1.9]
NODE_1_length_1538194_cov_1083.054483_94	-	103807	104169	363		CDS
NODE_1_length_1538194_cov_1083.054483_95	+	104456	105325	870	SPOUT1	CDS	K09142	methyltransferase [EC:2.1.1.-]
NODE_1_length_1538194_cov_1083.054483_96	+	105486	106454	969	RP-L3, MRPL3, rplC	CDS	K02906	large subunit ribosomal protein L3
NODE_1_length_1538194_cov_1083.054483_97	+	106458	107264	807	RP-L4e, RPL4	CDS	K02930	large subunit ribosomal protein L4e
NODE_1_length_1538194_cov_1083.054483_98	+	107275	107541	267		CDS
NODE_1_length_1538194_cov_1083.054483_99	+	107551	108273	723	RP-L2, MRPL2, rplB	CDS	K02886	large subunit ribosomal protein L2
NODE_1_length_1538194_cov_1083.054483_100	+	108299	108700	402	RP-S19, rpsS	CDS	K02965	small subunit ribosomal protein S19
NODE_1_length_1538194_cov_1083.054483_101	+	108858	109310	453	RP-L22, MRPL22, rplV	CDS	K02890	large subunit ribosomal protein L22
NODE_1_length_1538194_cov_1083.054483_102	+	109313	109924	612	RP-S3, rpsC	CDS	K02982	small subunit ribosomal protein S3
NODE_1_length_1538194_cov_1083.054483_103	+	109934	110176	243	RP-L29, rpmC	CDS	K02904	large subunit ribosomal protein L29
NODE_1_length_1538194_cov_1083.054483_104	+	110173	110454	282	POP4, RPP29	CDS	K03538	ribonuclease P protein subunit POP4 [EC:3.1.26.5]
NODE_1_length_1538194_cov_1083.054483_105	+	110458	110778	321	RP-S17, MRPS17, rpsQ	CDS	K02961	small subunit ribosomal protein S17
NODE_1_length_1538194_cov_1083.054483_106	+	110781	111209	429	RP-L14, MRPL14, rplN	CDS	K02874	large subunit ribosomal protein L14
NODE_1_length_1538194_cov_1083.054483_107	+	111220	111567	348	RP-L24, MRPL24, rplX	CDS	K02895	large subunit ribosomal protein L24
NODE_1_length_1538194_cov_1083.054483_108	+	111582	112316	735	RP-S4e, RPS4	CDS	K02987	small subunit ribosomal protein S4e
NODE_1_length_1538194_cov_1083.054483_109	+	112318	112869	552	RP-L5, MRPL5, rplE	CDS	K02931	large subunit ribosomal protein L5
NODE_1_length_1538194_cov_1083.054483_110	+	112872	113039	168	RP-S14, MRPS14, rpsN	CDS	K02954	small subunit ribosomal protein S14
NODE_1_length_1538194_cov_1083.054483_111	+	113052	113444	393	RP-S8, rpsH	CDS	K02994	small subunit ribosomal protein S8
NODE_1_length_1538194_cov_1083.054483_112	+	113455	113985	531	RP-L6, MRPL6, rplF	CDS	K02933	large subunit ribosomal protein L6
NODE_1_length_1538194_cov_1083.054483_113	+	113987	114508	522	RP-L32e, RPL32	CDS	K02912	large subunit ribosomal protein L32e
NODE_1_length_1538194_cov_1083.054483_114	+	114505	114939	435	RP-L19e, RPL19	CDS	K02885	large subunit ribosomal protein L19e
NODE_1_length_1538194_cov_1083.054483_115	+	114946	115536	591	RP-L18, MRPL18, rplR	CDS	K02881	large subunit ribosomal protein L18
NODE_1_length_1538194_cov_1083.054483_116	+	115538	116143	606	RP-S5, MRPS5, rpsE	CDS	K02988	small subunit ribosomal protein S5
NODE_1_length_1538194_cov_1083.054483_117	+	116148	116612	465	RP-L30, MRPL30, rpmD	CDS	K02907	large subunit ribosomal protein L30
NODE_1_length_1538194_cov_1083.054483_118	+	116762	117196	435	RP-L15, MRPL15, rplO	CDS	K02876	large subunit ribosomal protein L15
NODE_1_length_1538194_cov_1083.054483_119	+	117221	118636	1416		CDS
NODE_1_length_1538194_cov_1083.054483_120	+	118647	119243	597	adk, AK	CDS	K00939	adenylate kinase [EC:2.7.4.3]
NODE_1_length_1538194_cov_1083.054483_121	+	119248	119769	522		CDS
NODE_1_length_1538194_cov_1083.054483_122	+	119785	120357	573	cmk	CDS	K00945	CMP/dCMP kinase [EC:2.7.4.25]
NODE_1_length_1538194_cov_1083.054483_123	+	120404	121378	975	DKC1, NOLA4, CBF5	CDS	K11131	H/ACA ribonucleoprotein complex subunit 4 [EC:5.4.99.-]
NODE_1_length_1538194_cov_1083.054483_124	+	121371	122018	648	rsmC	CDS	K00564	16S rRNA (guanine1207-N2)-methyltransferase [EC:2.1.1.172]
NODE_1_length_1538194_cov_1083.054483_125	+	122353	122829	477	RP-S13, rpsM	CDS	K02952	small subunit ribosomal protein S13
NODE_1_length_1538194_cov_1083.054483_126	+	122843	123352	510	RP-S4, rpsD	CDS	K02986	small subunit ribosomal protein S4
NODE_1_length_1538194_cov_1083.054483_127	+	123355	123756	402	RP-S11, MRPS11, rpsK	CDS	K02948	small subunit ribosomal protein S11
NODE_1_length_1538194_cov_1083.054483_128	+	123820	124626	807	rpoD	CDS	K03047	DNA-directed RNA polymerase subunit D [EC:2.7.7.6]
NODE_1_length_1538194_cov_1083.054483_129	+	124627	124989	363	RP-L18e, RPL18	CDS	K02883	large subunit ribosomal protein L18e
NODE_1_length_1538194_cov_1083.054483_130	+	124996	125433	438	RP-L13, MRPL13, rplM	CDS	K02871	large subunit ribosomal protein L13
NODE_1_length_1538194_cov_1083.054483_131	+	125430	125834	405	RP-S9, MRPS9, rpsI	CDS	K02996	small subunit ribosomal protein S9
NODE_1_length_1538194_cov_1083.054483_132	+	125844	126059	216	rpoN	CDS	K03058	DNA-directed RNA polymerase subunit N [EC:2.7.7.6]
NODE_1_length_1538194_cov_1083.054483_133	+	126106	126762	657	RP-S2, MRPS2, rpsB	CDS	K02967	small subunit ribosomal protein S2
NODE_1_length_1538194_cov_1083.054483_134	+	126752	127600	849	MEMO1	CDS	K06990	MEMO1 family protein
NODE_1_length_1538194_cov_1083.054483_135	+	127680	128510	831		CDS
NODE_1_length_1538194_cov_1083.054483_136	+	128500	129270	771	ipk	CDS	K06981	isopentenyl phosphate kinase [EC:2.7.4.26]
NODE_1_length_1538194_cov_1083.054483_137	+	129305	130387	1083	idi, IDI	CDS	K01823	isopentenyl-diphosphate Delta-isomerase [EC:5.3.3.2]
NODE_1_length_1538194_cov_1083.054483_138	+	130380	131345	966	idsA	CDS	K13787	geranylgeranyl diphosphate synthase, type I [EC:2.5.1.1 2.5.1.10 2.5.1.29]
NODE_1_length_1538194_cov_1083.054483_139	+	131422	133143	1722	EARS, gltX	CDS	K01885	glutamyl-tRNA synthetase [EC:6.1.1.17]
NODE_1_length_1538194_cov_1083.054483_140	+	133227	133784	558	RP-L7Ae, RPL7A	CDS	K02936	large subunit ribosomal protein L7Ae
NODE_1_length_1538194_cov_1083.054483_141	+	133801	134019	219	RP-S28e, RPS28	CDS	K02979	small subunit ribosomal protein S28e
NODE_1_length_1538194_cov_1083.054483_142	+	134040	134216	177	RP-L24e, RPL24	CDS	K02896	large subunit ribosomal protein L24e
NODE_1_length_1538194_cov_1083.054483_143	+	134221	134670	450	ndk, NME	CDS	K00940	nucleoside-diphosphate kinase [EC:2.7.4.6]
NODE_1_length_1538194_cov_1083.054483_144	+	134800	134940	141		CDS
NODE_1_length_1538194_cov_1083.054483_145	+	135019	136599	1581	EIF5B	CDS	K03243	translation initiation factor 5B
NODE_1_length_1538194_cov_1083.054483_146	+	136708	137079	372	RP-S6e, RPS6	CDS	K02991	small subunit ribosomal protein S6e
NODE_1_length_1538194_cov_1083.054483_147	+	137072	138307	1236	EIF2S3	CDS	K03242	translation initiation factor 2 subunit 3
NODE_1_length_1538194_cov_1083.054483_148	+	138297	138689	393	K07158	CDS	K07158	uncharacterized protein
NODE_1_length_1538194_cov_1083.054483_149	+	138807	139397	591	rpoE1	CDS	K03049	DNA-directed RNA polymerase subunit E' [EC:2.7.7.6]
NODE_1_length_1538194_cov_1083.054483_150	+	139397	139612	216	rpoE2	CDS	K03050	DNA-directed RNA polymerase subunit E" [EC:2.7.7.6]
NODE_1_length_1538194_cov_1083.054483_151	+	139616	140131	516	dpck	CDS	K09735	GTP-dependent dephospho-CoA kinase [EC:2.7.1.237]
NODE_1_length_1538194_cov_1083.054483_152	-	140146	141390	1245		CDS
NODE_1_length_1538194_cov_1083.054483_153	+	141616	141954	339	RP-S24e, RPS24	CDS	K02974	small subunit ribosomal protein S24e
NODE_1_length_1538194_cov_1083.054483_154	+	141968	142132	165	RP-S27Ae, RPS27A, UBA80	CDS	K02977	ubiquitin-small subunit ribosomal protein S27Ae
NODE_1_length_1538194_cov_1083.054483_155	+	142147	143139	993	OSGEP, KAE1, QRI7	CDS	K01409	N6-L-threonylcarbamoyladenine synthase [EC:2.3.1.234]
NODE_1_length_1538194_cov_1083.054483_156	+	143127	143780	654	TP53RK, PRPK, BUD32	CDS	K08851	TP53 regulating kinase and related kinases [EC:2.7.11.1]
NODE_1_length_1538194_cov_1083.054483_157	+	143786	144361	576	rdgB, ITPA	CDS	K01519	XTP/dITP diphosphohydrolase [EC:3.6.1.66]
NODE_1_length_1538194_cov_1083.054483_158	+	144398	144847	450	RP-S15, MRPS15, rpsO	CDS	K02956	small subunit ribosomal protein S15
NODE_1_length_1538194_cov_1083.054483_159	+	144868	146334	1467	recJ	CDS	K07462	single-stranded-DNA-specific exonuclease [EC:3.1.-.-]
NODE_1_length_1538194_cov_1083.054483_160	+	146651	147283	633	RP-S3Ae, RPS3A	CDS	K02984	small subunit ribosomal protein S3Ae
NODE_1_length_1538194_cov_1083.054483_161	+	147356	148675	1320	glmM	CDS	K03431	phosphoglucosamine mutase [EC:5.4.2.10]
NODE_1_length_1538194_cov_1083.054483_162	+	148672	149952	1281	K23144	CDS	K23144	UDP-N-acetylglucosamine diphosphorylase / glucose-1-phosphate thymidylyltransferase / UDP-N-acetylgalactosamine diphosphorylase / glucosamine-1-phosphate N-acetyltransferase / galactosamine-1-phosphate N-acetyltransferase [EC:2.7.7.23 2.7.7.24 2.7.7.83 2.3.1.157 2.3.1.276]
NODE_1_length_1538194_cov_1083.054483_163	+	149949	151508	1560		CDS
NODE_1_length_1538194_cov_1083.054483_164	+	151508	151813	306		CDS
NODE_1_length_1538194_cov_1083.054483_165	-	151810	153021	1212	ychF	CDS	K06942	ribosome-binding ATPase
NODE_1_length_1538194_cov_1083.054483_166	+	153238	154164	927	serA, PHGDH	CDS	K00058	D-3-phosphoglycerate dehydrogenase / 2-oxoglutarate reductase [EC:1.1.1.95 1.1.1.399]
NODE_1_length_1538194_cov_1083.054483_167	+	154183	154701	519	RP-L15e, RPL15	CDS	K02877	large subunit ribosomal protein L15e
NODE_1_length_1538194_cov_1083.054483_168	+	154768	155196	429	K07581	CDS	K07581	RNA-binding protein
NODE_1_length_1538194_cov_1083.054483_169	+	155240	155539	300		CDS
NODE_1_length_1538194_cov_1083.054483_170	+	155871	157292	1422	E2.3.3.3	CDS	K05942	citrate (Re)-synthase [EC:2.3.3.3]
NODE_1_length_1538194_cov_1083.054483_171	+	157381	158259	879		CDS
NODE_1_length_1538194_cov_1083.054483_172	+	158355	159077	723	psmA, prcA	CDS	K03432	proteasome alpha subunit [EC:3.4.25.1]
NODE_1_length_1538194_cov_1083.054483_173	+	159082	159780	699	SDO1, SBDS	CDS	K14574	ribosome maturation protein SDO1
NODE_1_length_1538194_cov_1083.054483_174	+	159790	160476	687	RRP4, EXOSC2	CDS	K03679	exosome complex component RRP4
NODE_1_length_1538194_cov_1083.054483_175	+	160481	161224	744	RRP41, EXOSC4, SKI6	CDS	K11600	exosome complex component RRP41
NODE_1_length_1538194_cov_1083.054483_176	+	161228	162058	831	RRP42, EXOSC7	CDS	K12589	exosome complex component RRP42
NODE_1_length_1538194_cov_1083.054483_177	+	162058	162321	264	RP-L37Ae, RPL37A	CDS	K02921	large subunit ribosomal protein L37Ae
NODE_1_length_1538194_cov_1083.054483_178	+	162344	162874	531		CDS
NODE_1_length_1538194_cov_1083.054483_179	+	162871	163116	246	pcc1	CDS	K09741	KEOPS complex subunit Pcc1
NODE_1_length_1538194_cov_1083.054483_180	+	163119	163481	363	pfdB, PFDN6	CDS	K04798	prefoldin beta subunit
NODE_1_length_1538194_cov_1083.054483_181	+	163492	163773	282		CDS
NODE_1_length_1538194_cov_1083.054483_182	+	163766	164767	1002		CDS
NODE_1_length_1538194_cov_1083.054483_183	+	164823	165659	837	ecfA1	CDS	K16786	energy-coupling factor transport system ATP-binding protein [EC:7.-.-.-]
NODE_1_length_1538194_cov_1083.054483_184	+	165656	166471	816	ecfA2	CDS	K16787	energy-coupling factor transport system ATP-binding protein [EC:7.-.-.-]
NODE_1_length_1538194_cov_1083.054483_185	+	166468	167217	750	ecfT	CDS	K16785	energy-coupling factor transport system permease protein
NODE_1_length_1538194_cov_1083.054483_186	+	167405	167983	579	hxlB	CDS	K08094	6-phospho-3-hexuloisomerase [EC:5.3.1.27]
NODE_1_length_1538194_cov_1083.054483_187	+	168112	170319	2208	EEF2	CDS	K03234	elongation factor 2
NODE_1_length_1538194_cov_1083.054483_188	+	170674	170805	132		CDS
NODE_1_length_1538194_cov_1083.054483_189	-	170813	171484	672	EMG1, NEP1	CDS	K14568	rRNA small subunit pseudouridine methyltransferase Nep1 [EC:2.1.1.260]
NODE_1_length_1538194_cov_1083.054483_190	+	171581	171898	318	RPR2, RPP21	CDS	K03540	ribonuclease P protein subunit RPR2 [EC:3.1.26.5]
NODE_1_length_1538194_cov_1083.054483_191	+	172097	173290	1194	deaD, cshA	CDS	K05592	ATP-dependent RNA helicase DeaD [EC:3.6.4.13]
NODE_1_length_1538194_cov_1083.054483_192	-	173311	174099	789	otsB	CDS	K01087	trehalose 6-phosphate phosphatase [EC:3.1.3.12]
NODE_1_length_1538194_cov_1083.054483_193	-	174187	174444	258		CDS
NODE_1_length_1538194_cov_1083.054483_194	-	174523	175479	957	menA	CDS	K02548	1,4-dihydroxy-2-naphthoate polyprenyltransferase [EC:2.5.1.74]
NODE_1_length_1538194_cov_1083.054483_195	+	175632	176660	1029	K07089	CDS	K07089	uncharacterized protein
NODE_1_length_1538194_cov_1083.054483_196	+	176885	177352	468	RP-S19e, RPS19	CDS	K02966	small subunit ribosomal protein S19e
NODE_1_length_1538194_cov_1083.054483_197	+	177363	177698	336	PDCD5, TFAR19	CDS	K06875	programmed cell death protein 5
NODE_1_length_1538194_cov_1083.054483_198	+	177708	177863	156	RP-L39e, RPL39	CDS	K02924	large subunit ribosomal protein L39e
NODE_1_length_1538194_cov_1083.054483_199	+	177882	178271	390	RP-L31e, RPL31	CDS	K02910	large subunit ribosomal protein L31e
NODE_1_length_1538194_cov_1083.054483_200	+	178277	178948	672	EIF6	CDS	K03264	translation initiation factor 6
NODE_1_length_1538194_cov_1083.054483_201	+	178955	179149	195	RP-LX, rplX	CDS	K02944	large subunit ribosomal protein LX
NODE_1_length_1538194_cov_1083.054483_202	+	179146	179592	447	pfdA, PFDN5	CDS	K04797	prefoldin alpha subunit
NODE_1_length_1538194_cov_1083.054483_203	+	179596	180501	906	ftsY	CDS	K03110	fused signal recognition particle receptor
NODE_1_length_1538194_cov_1083.054483_204	+	180582	181511	930	OTC, argF, argI	CDS	K00611	ornithine carbamoyltransferase [EC:2.1.3.3]
NODE_1_length_1538194_cov_1083.054483_205	+	181529	182329	801	dtdA, GEK1	CDS	K09716	D-aminoacyl-tRNA deacylase [EC:3.1.1.96]
NODE_1_length_1538194_cov_1083.054483_206	+	182406	182582	177	SEC61G, SSS1, secE	CDS	K07342	protein transport protein SEC61 subunit gamma and related proteins
NODE_1_length_1538194_cov_1083.054483_207	+	182589	183143	555	nusG	CDS	K02601	transcription termination/antitermination protein NusG
NODE_1_length_1538194_cov_1083.054483_208	+	183146	183655	510	RP-L11, MRPL11, rplK	CDS	K02867	large subunit ribosomal protein L11
NODE_1_length_1538194_cov_1083.054483_209	+	183645	184289	645	RP-L1, MRPL1, rplA	CDS	K02863	large subunit ribosomal protein L1
NODE_1_length_1538194_cov_1083.054483_210	+	184295	185161	867	RP-L10, MRPL10, rplJ	CDS	K02864	large subunit ribosomal protein L10
NODE_1_length_1538194_cov_1083.054483_211	+	185271	185600	330	RP-L12, rpl12	CDS	K02869	large subunit ribosomal protein L12
NODE_1_length_1538194_cov_1083.054483_212	+	185775	188543	2769	AARS, alaS	CDS	K01872	alanyl-tRNA synthetase [EC:6.1.1.7]
NODE_1_length_1538194_cov_1083.054483_213	+	188591	191479	2889	LARS, leuS	CDS	K01869	leucyl-tRNA synthetase [EC:6.1.1.4]
NODE_1_length_1538194_cov_1083.054483_214	+	191501	192145	645		CDS
NODE_1_length_1538194_cov_1083.054483_215	-	192315	193178	864		CDS
NODE_1_length_1538194_cov_1083.054483_216	+	193382	194380	999	TRM5, TRMT5	CDS	K15429	tRNA (guanine37-N1)-methyltransferase [EC:2.1.1.228]
NODE_1_length_1538194_cov_1083.054483_217	+	194482	194946	465		CDS
NODE_1_length_1538194_cov_1083.054483_218	+	194988	195251	264		CDS
NODE_1_length_1538194_cov_1083.054483_219	-	195263	195682	420	K09738	CDS	K09738	uncharacterized protein
NODE_1_length_1538194_cov_1083.054483_220	+	195747	196421	675	E2.1.1.77, pcm	CDS	K00573	protein-L-isoaspartate(D-aspartate) O-methyltransferase [EC:2.1.1.77]
NODE_1_length_1538194_cov_1083.054483_221	-	196424	197446	1023	FEN1, RAD2	CDS	K04799	flap endonuclease-1 [EC:3.1.-.-]
NODE_1_length_1538194_cov_1083.054483_222	-	197480	197719	240		CDS
NODE_1_length_1538194_cov_1083.054483_223	-	197762	199948	2187	VCP, CDC48	CDS	K13525	transitional endoplasmic reticulum ATPase
NODE_1_length_1538194_cov_1083.054483_224	-	200052	200342	291	EEF1B	CDS	K03232	elongation factor 1-beta
NODE_1_length_1538194_cov_1083.054483_225	-	200353	200529	177	K07580	CDS	K07580	Zn-ribbon RNA-binding protein
NODE_1_length_1538194_cov_1083.054483_226	-	200611	201708	1098		CDS
NODE_1_length_1538194_cov_1083.054483_227	+	201766	202125	360	PTH2, PTRH2	CDS	K04794	peptidyl-tRNA hydrolase, PTH2 family [EC:3.1.1.29]
NODE_1_length_1538194_cov_1083.054483_228	+	202136	203449	1314	truD, PUS7	CDS	K06176	tRNA pseudouridine13 synthase [EC:5.4.99.27]
NODE_1_length_1538194_cov_1083.054483_229	-	203489	204808	1320	aspC, aspS	CDS	K09759	nondiscriminating aspartyl-tRNA synthetase [EC:6.1.1.23]
NODE_1_length_1538194_cov_1083.054483_230	-	204870	205367	498		CDS
NODE_1_length_1538194_cov_1083.054483_231	-	205378	205656	279	ssh10b	CDS	K03622	archaea-specific DNA-binding protein
NODE_1_length_1538194_cov_1083.054483_232	+	205786	206277	492		CDS
NODE_1_length_1538194_cov_1083.054483_233	+	206317	206478	162	RP-L40e, RPL40, UBA52	CDS	K02927	ubiquitin-large subunit ribosomal protein L40e
NODE_1_length_1538194_cov_1083.054483_234	-	206823	207791	969		CDS
NODE_1_length_1538194_cov_1083.054483_235	-	207801	208745	945	metF, MTHFR	CDS	K00297	methylenetetrahydrofolate reductase (NADH) [EC:1.5.1.54]
NODE_1_length_1538194_cov_1083.054483_236	-	208759	209391	633		CDS
NODE_1_length_1538194_cov_1083.054483_237	+	209512	209880	369		CDS
NODE_1_length_1538194_cov_1083.054483_238	+	209877	210527	651	mobA	CDS	K03752	molybdenum cofactor guanylyltransferase [EC:2.7.7.77]
NODE_1_length_1538194_cov_1083.054483_239	-	210451	212457	2007		CDS
NODE_1_length_1538194_cov_1083.054483_240	-	212507	213043	537		CDS
NODE_1_length_1538194_cov_1083.054483_241	+	213149	215020	1872		CDS
NODE_1_length_1538194_cov_1083.054483_242	+	215085	215339	255		CDS
NODE_1_length_1538194_cov_1083.054483_243	-	215716	216747	1032	hom	CDS	K00003	homoserine dehydrogenase [EC:1.1.1.3]
NODE_1_length_1538194_cov_1083.054483_244	+	216857	218398	1542	E3.2.1.1A	CDS	K07405	alpha-amylase [EC:3.2.1.1]
NODE_1_length_1538194_cov_1083.054483_245	+	218415	219374	960	galT, GALT	CDS	K00965	UDPglucose--hexose-1-phosphate uridylyltransferase [EC:2.7.7.12]
NODE_1_length_1538194_cov_1083.054483_246	-	219375	220349	975	glk	CDS	K25026	glucokinase [EC:2.7.1.2]
NODE_1_length_1538194_cov_1083.054483_247	-	220346	221515	1170		CDS
NODE_1_length_1538194_cov_1083.054483_248	-	221512	222099	588		CDS
NODE_1_length_1538194_cov_1083.054483_249	-	222114	222356	243		CDS
NODE_1_length_1538194_cov_1083.054483_250	-	222402	224417	2016	GBE1, glgB	CDS	K00700	1,4-alpha-glucan branching enzyme [EC:2.4.1.18]
NODE_1_length_1538194_cov_1083.054483_251	-	224417	227689	3273	treS	CDS	K05343	maltose alpha-D-glucosyltransferase / alpha-amylase [EC:5.4.99.16 3.2.1.1]
NODE_1_length_1538194_cov_1083.054483_252	+	228028	228675	648		CDS
NODE_1_length_1538194_cov_1083.054483_253	-	228687	230192	1506	malQ	CDS	K00705	4-alpha-glucanotransferase [EC:2.4.1.25]
NODE_1_length_1538194_cov_1083.054483_254	-	230207	232627	2421		CDS
NODE_1_length_1538194_cov_1083.054483_255	+	232663	233175	513		CDS
NODE_1_length_1538194_cov_1083.054483_256	+	233366	233782	417	yhfA	CDS	K07397	putative redox protein
NODE_1_length_1538194_cov_1083.054483_257	+	233875	235119	1245		CDS
NODE_1_length_1538194_cov_1083.054483_258	-	235847	236644	798	uppS, cpdS	CDS	K15888	tritrans,polycis-undecaprenyl-diphosphate synthase [geranylgeranyl-diphosphate specific] [EC:2.5.1.89]
NODE_1_length_1538194_cov_1083.054483_259	-	236742	237821	1080	pepP	CDS	K01262	Xaa-Pro aminopeptidase [EC:3.4.11.9]
NODE_1_length_1538194_cov_1083.054483_260	+	237884	238450	567	yjjX	CDS	K01529	inosine/xanthosine triphosphatase [EC:3.6.1.73]
NODE_1_length_1538194_cov_1083.054483_261	-	238470	239489	1020	hypE	CDS	K04655	hydrogenase expression/formation protein HypE
NODE_1_length_1538194_cov_1083.054483_262	+	239576	239962	387	RP-S8e, RPS8	CDS	K02995	small subunit ribosomal protein S8e
NODE_1_length_1538194_cov_1083.054483_263	-	239972	240349	378	hypA, hybF	CDS	K04651	hydrogenase nickel incorporation protein HypA/HybF
NODE_1_length_1538194_cov_1083.054483_264	+	240407	240712	306	SRP19	CDS	K03105	signal recognition particle subunit SRP19
NODE_1_length_1538194_cov_1083.054483_265	+	240824	241108	285		CDS
NODE_1_length_1538194_cov_1083.054483_266	+	241074	242012	939	TFIIB, GTF2B, SUA7, tfb	CDS	K03124	transcription initiation factor TFIIB
NODE_1_length_1538194_cov_1083.054483_267	+	242049	242456	408		CDS
NODE_1_length_1538194_cov_1083.054483_268	+	242458	243069	612	rlmE, rrmJ, ftsJ	CDS	K02427	23S rRNA (uridine2552-2'-O)-methyltransferase [EC:2.1.1.166]
NODE_1_length_1538194_cov_1083.054483_269	+	243153	244370	1218	NOP56	CDS	K14564	nucleolar protein 56
NODE_1_length_1538194_cov_1083.054483_270	+	244364	245050	687	flpA	CDS	K04795	fibrillarin-like pre-rRNA processing protein
NODE_1_length_1538194_cov_1083.054483_271	+	245047	245466	420	K09737	CDS	K09737	uncharacterized protein
NODE_1_length_1538194_cov_1083.054483_272	+	245534	246490	957	K07728	CDS	K07728	putative transcriptional regulator
NODE_1_length_1538194_cov_1083.054483_273	-	246478	247119	642	rnhB	CDS	K03470	ribonuclease HII [EC:3.1.26.4]
NODE_1_length_1538194_cov_1083.054483_274	+	247320	248492	1173	TRMT1, trm1	CDS	K00555	tRNA (guanine26-N2/guanine27-N2)-dimethyltransferase [EC:2.1.1.215 2.1.1.216]
NODE_1_length_1538194_cov_1083.054483_275	+	248946	249326	381	speD, AMD1	CDS	K01611	S-adenosylmethionine decarboxylase [EC:4.1.1.50]
NODE_1_length_1538194_cov_1083.054483_276	-	249430	250890	1461	PARS, proS	CDS	K01881	prolyl-tRNA synthetase [EC:6.1.1.15]
NODE_1_length_1538194_cov_1083.054483_277	-	250906	252153	1248		CDS
NODE_1_length_1538194_cov_1083.054483_278	+	252389	252670	282		CDS
NODE_1_length_1538194_cov_1083.054483_279	+	252676	252981	306	PFAM cation antiporter	CDS
NODE_1_length_1538194_cov_1083.054483_280	+	252978	253286	309	ehbB	CDS		Energy-converting hydrogenase B, subunit B
NODE_1_length_1538194_cov_1083.054483_281	+	253283	253765	483	ehbC	CDS		Energy-converting hydrogenase B subunit C
NODE_1_length_1538194_cov_1083.054483_282	+	253762	254019	258	ehbD	CDS		Energy-converting hydrogenase B, subunit D
NODE_1_length_1538194_cov_1083.054483_283	+	254012	254386	375		CDS		NADH-ubiquinone/plastoquinone oxidoreductase chain 4L
NODE_1_length_1538194_cov_1083.054483_284	+	254383	255903	1521		CDS	K14115	Proton-conducting membrane transporter
NODE_1_length_1538194_cov_1083.054483_285	+	255891	256217	327		CDS
NODE_1_length_1538194_cov_1083.054483_286	+	256218	257084	867		CDS		Domain related to MnhB subunit of Na+/H+ antiporter
NODE_1_length_1538194_cov_1083.054483_287	+	257081	257368	288		CDS
NODE_1_length_1538194_cov_1083.054483_288	+	257369	257824	456		CDS
NODE_1_length_1538194_cov_1083.054483_289	+	257821	258897	1077		CDS
NODE_1_length_1538194_cov_1083.054483_290	+	258894	259397	504	4Fe-4S dicluster domain	CDS
NODE_1_length_1538194_cov_1083.054483_291	+	259387	259836	450	ehbM	CDS	K14122	energy-converting hydrogenase B subunit M
NODE_1_length_1538194_cov_1083.054483_292	+	259838	261019	1182	ehbN	CDS	K14123	energy-converting hydrogenase B subunit N
NODE_1_length_1538194_cov_1083.054483_293	+	261020	262075	1056	NADH dehydrogenase	CDS
NODE_1_length_1538194_cov_1083.054483_294	+	262089	262355	267	ehbP	CDS	K14125	energy-converting hydrogenase B subunit P
NODE_1_length_1538194_cov_1083.054483_295	+	262372	262671	300	ATPVF, ntpF, atpF	CDS	K02122	V/A-type H+/Na+-transporting ATPase subunit F
NODE_1_length_1538194_cov_1083.054483_296	+	262668	263291	624	ATPVE, ntpE, atpE	CDS	K02121	V/A-type H+/Na+-transporting ATPase subunit E
NODE_1_length_1538194_cov_1083.054483_297	+	263297	265060	1764	ATPVA, ntpA, atpA	CDS	K02117	V/A-type H+/Na+-transporting ATPase subunit A [EC:7.1.2.2 7.2.2.1]
NODE_1_length_1538194_cov_1083.054483_298	+	265060	266439	1380	ATPVB, ntpB, atpB	CDS	K02118	V/A-type H+/Na+-transporting ATPase subunit B
NODE_1_length_1538194_cov_1083.054483_299	+	266450	267091	642	ATPVD, ntpD, atpD	CDS	K02120	V/A-type H+/Na+-transporting ATPase subunit D
NODE_1_length_1538194_cov_1083.054483_300	+	267084	267248	165		CDS
NODE_1_length_1538194_cov_1083.054483_301	+	267245	267607	363	ATPVK	CDS
NODE_1_length_1538194_cov_1083.054483_302	+	267632	269560	1929	ATPVI, ntpI, atpI	CDS	K02123	V/A-type H+/Na+-transporting ATPase subunit I
NODE_1_length_1538194_cov_1083.054483_303	-	269550	270476	927	ATPVC	CDS
NODE_1_length_1538194_cov_1083.054483_304	-	270497	270817	321	ATPVH	CDS	K02107
NODE_1_length_1538194_cov_1083.054483_305	-	270817	271578	762	TRM61, GCD14	CDS	K07442	tRNA (adenine57-N1/adenine58-N1)-methyltransferase catalytic subunit [EC:2.1.1.219 2.1.1.220]
NODE_1_length_1538194_cov_1083.054483_306	+	271747	272022	276	acyP	CDS	K01512	acylphosphatase [EC:3.6.1.7]
NODE_1_length_1538194_cov_1083.054483_307	-	272057	272506	450		CDS
NODE_1_length_1538194_cov_1083.054483_308	+	272731	275124	2394	pps, ppsA	CDS	K01007	pyruvate, water dikinase [EC:2.7.9.2]
NODE_1_length_1538194_cov_1083.054483_309	-	275200	275523	324		CDS
NODE_1_length_1538194_cov_1083.054483_310	-	275754	276719	966	radA	CDS	K04483	DNA repair protein RadA
NODE_1_length_1538194_cov_1083.054483_311	-	276709	277038	330		CDS
NODE_1_length_1538194_cov_1083.054483_312	-	276998	278371	1374		CDS
NODE_1_length_1538194_cov_1083.054483_313	-	278368	278967	600		CDS
NODE_1_length_1538194_cov_1083.054483_314	+	279123	279752	630		CDS
NODE_1_length_1538194_cov_1083.054483_315	+	279818	280336	519		CDS
NODE_1_length_1538194_cov_1083.054483_316	+	280354	281079	726		CDS
NODE_1_length_1538194_cov_1083.054483_317	-	281076	281915	840	lipS1	CDS	K09711	lipoyl synthase
NODE_1_length_1538194_cov_1083.054483_318	-	281947	282222	276		CDS
NODE_1_length_1538194_cov_1083.054483_319	-	282227	282982	756	lplA, lplJ, lipL1	CDS	K03800	lipoate---protein ligase [EC:6.3.1.20]
NODE_1_length_1538194_cov_1083.054483_320	-	282979	283935	957	lipS2	CDS	K24689	lipoyl synthase
NODE_1_length_1538194_cov_1083.054483_321	-	283939	284718	780		CDS
NODE_1_length_1538194_cov_1083.054483_322	-	284811	286616	1806		CDS
NODE_1_length_1538194_cov_1083.054483_323	-	286622	288430	1809		CDS
NODE_1_length_1538194_cov_1083.054483_324	+	288596	289216	621		CDS
NODE_1_length_1538194_cov_1083.054483_325	+	289247	290098	852	nfo	CDS	K01151	deoxyribonuclease IV [EC:3.1.21.2]
NODE_1_length_1538194_cov_1083.054483_326	-	290105	290581	477		CDS
NODE_1_length_1538194_cov_1083.054483_327	+	290710	291264	555		CDS
NODE_1_length_1538194_cov_1083.054483_328	-	291254	292384	1131		CDS
NODE_1_length_1538194_cov_1083.054483_329	-	292419	292643	225		CDS
NODE_1_length_1538194_cov_1083.054483_330	-	292654	292884	231		CDS
NODE_1_length_1538194_cov_1083.054483_331	-	292947	293837	891	mtrH	CDS	K00584	tetrahydromethanopterin S-methyltransferase subunit H [EC:2.1.1.86]
NODE_1_length_1538194_cov_1083.054483_332	-	293834	294712	879	metE	CDS	K00549	5-methyltetrahydropteroyltriglutamate--homocysteine methyltransferase [EC:2.1.1.14]
NODE_1_length_1538194_cov_1083.054483_333	-	294721	295368	648		CDS
NODE_1_length_1538194_cov_1083.054483_334	+	295474	295734	261	K07166	CDS	K07166	ACT domain-containing protein
NODE_1_length_1538194_cov_1083.054483_335	+	295748	296650	903	serB, PSPH	CDS	K01079	phosphoserine phosphatase [EC:3.1.3.3]
NODE_1_length_1538194_cov_1083.054483_336	+	296846	297262	417	trxA	CDS	K03671	thioredoxin 1
NODE_1_length_1538194_cov_1083.054483_337	+	297432	299111	1680	PYG, glgP	CDS	K00688	glycogen phosphorylase [EC:2.4.1.1]
NODE_1_length_1538194_cov_1083.054483_338	+	299162	299929	768	K07051	CDS	K07051	uncharacterized protein
NODE_1_length_1538194_cov_1083.054483_339	-	300038	301108	1071	INO1, ISYNA1	CDS	K01858	myo-inositol-1-phosphate synthase [EC:5.5.1.4]
NODE_1_length_1538194_cov_1083.054483_340	-	301475	302233	759	trmB	CDS	K23356	HTH-type transcriptional regulator, sugar sensing transcriptional regulator
NODE_1_length_1538194_cov_1083.054483_341	+	302305	303750	1446	K06937	CDS	K06937	glycerol dibiphytanyl glycerol tetraether/macrocyclic archaeol synthase
NODE_1_length_1538194_cov_1083.054483_342	+	303803	304087	285	RP-S25e, RPS25	CDS	K02975	small subunit ribosomal protein S25e
NODE_1_length_1538194_cov_1083.054483_343	+	304099	304476	378	K09143	CDS	K09143	uncharacterized protein
NODE_1_length_1538194_cov_1083.054483_344	-	304497	304895	399		CDS
NODE_1_length_1538194_cov_1083.054483_345	-	304906	305724	819	larC	CDS	K09121	pyridinium-3,5-bisthiocarboxylic acid mononucleotide nickel chelatase [EC:4.99.1.12]
NODE_1_length_1538194_cov_1083.054483_346	+	305779	306555	777	larB	CDS	K06898	pyridinium-3,5-biscarboxylic acid mononucleotide synthase [EC:2.5.1.143]
NODE_1_length_1538194_cov_1083.054483_347	-	306592	306849	258	RPABC2, RPB6, POLR2F	CDS	K03014	DNA-directed RNA polymerases I, II, and III subunit RPABC2
NODE_1_length_1538194_cov_1083.054483_348	-	306846	308513	1668	cct, ths	CDS	K22447	archaeal chaperonin
NODE_1_length_1538194_cov_1083.054483_349	-	308836	309336	501	rimI	CDS	K03789	[ribosomal protein S18]-alanine N-acetyltransferase [EC:2.3.1.266]
NODE_1_length_1538194_cov_1083.054483_350	-	309410	309994	585		CDS
NODE_1_length_1538194_cov_1083.054483_351	-	310045	310458	414		CDS
NODE_1_length_1538194_cov_1083.054483_352	-	310999	311730	732		CDS
NODE_1_length_1538194_cov_1083.054483_353	-	311730	312770	1041	purP	CDS	K06863	5-formaminoimidazole-4-carboxamide-1-(beta)-D-ribofuranosyl 5'-monophosphate synthetase [EC:6.3.4.23]
NODE_1_length_1538194_cov_1083.054483_354	-	312772	313875	1104	purP	CDS	K06863	5-formaminoimidazole-4-carboxamide-1-(beta)-D-ribofuranosyl 5'-monophosphate synthetase [EC:6.3.4.23]
NODE_1_length_1538194_cov_1083.054483_355	+	314104	314718	615		CDS
NODE_1_length_1538194_cov_1083.054483_356	+	314918	316102	1185	adh1	CDS	K19954	alcohol dehydrogenase [EC:1.1.1.-]
NODE_1_length_1538194_cov_1083.054483_357	+	316103	317008	906	PRPS, prsA	CDS	K00948	ribose-phosphate pyrophosphokinase [EC:2.7.6.1]
NODE_1_length_1538194_cov_1083.054483_358	+	317067	318050	984	K18237	CDS	K18237	ribose 1,5-bisphosphate isomerase [EC:5.3.1.29]
NODE_1_length_1538194_cov_1083.054483_359	+	318057	319367	1311	rbcL, cbbL	CDS	K01601	ribulose-bisphosphate carboxylase large chain [EC:4.1.1.39]
NODE_1_length_1538194_cov_1083.054483_360	+	319373	320920	1548	ampp	CDS	K18931	AMP phosphorylase [EC:2.4.2.57]
NODE_1_length_1538194_cov_1083.054483_361	+	321009	322901	1893	top6B	CDS	K03167	DNA topoisomerase VI subunit B [EC:5.6.2.2]
NODE_1_length_1538194_cov_1083.054483_362	+	322906	324060	1155	top6A	CDS	K03166	DNA topoisomerase VI subunit A [EC:5.6.2.2]
NODE_1_length_1538194_cov_1083.054483_363	+	324070	324423	354		CDS
NODE_1_length_1538194_cov_1083.054483_364	-	324392	324979	588	ubiX, bsdB, PAD1	CDS	K03186	flavin prenyltransferase [EC:2.5.1.129]
NODE_1_length_1538194_cov_1083.054483_365	+	325163	325396	234		CDS
NODE_1_length_1538194_cov_1083.054483_366	-	325393	326010	618	ccdA	CDS	K06196	cytochrome c-type biogenesis protein
NODE_1_length_1538194_cov_1083.054483_367	-	326010	326438	429		CDS
NODE_1_length_1538194_cov_1083.054483_368	-	326444	327565	1122	WARS, trpS	CDS	K01867	tryptophanyl-tRNA synthetase [EC:6.1.1.2]
NODE_1_length_1538194_cov_1083.054483_369	+	327706	328371	666		CDS
NODE_1_length_1538194_cov_1083.054483_370	-	328382	329587	1206	sepcysS	CDS	K06868	Sep-tRNA:Cys-tRNA synthetase [EC:2.5.1.73]
NODE_1_length_1538194_cov_1083.054483_371	-	329584	329769	186		CDS
NODE_1_length_1538194_cov_1083.054483_372	+	329923	330717	795		CDS
NODE_1_length_1538194_cov_1083.054483_373	-	330707	331168	462		CDS
NODE_1_length_1538194_cov_1083.054483_374	-	331173	331655	483	K09129	CDS	K09129	uncharacterized protein
NODE_1_length_1538194_cov_1083.054483_375	+	331802	332242	441		CDS
NODE_1_length_1538194_cov_1083.054483_376	+	332285	332773	489		CDS
NODE_1_length_1538194_cov_1083.054483_377	-	332800	333495	696		CDS
NODE_1_length_1538194_cov_1083.054483_378	+	333747	333971	225		CDS
NODE_1_length_1538194_cov_1083.054483_379	+	333985	335547	1563	putP	CDS	K11928	sodium/proline symporter
NODE_1_length_1538194_cov_1083.054483_380	+	335625	336566	942	mscS	CDS	K03442	small conductance mechanosensitive channel
NODE_1_length_1538194_cov_1083.054483_381	+	336651	336983	333		CDS
NODE_1_length_1538194_cov_1083.054483_382	+	337035	337673	639	marC	CDS	K05595	multiple antibiotic resistance protein
NODE_1_length_1538194_cov_1083.054483_383	+	338607	339935	1329		CDS
NODE_1_length_1538194_cov_1083.054483_384	+	340958	341947	990	TFIIB, GTF2B, SUA7, tfb	CDS	K03124	transcription initiation factor TFIIB
NODE_1_length_1538194_cov_1083.054483_385	-	341954	342169	216		CDS
NODE_1_length_1538194_cov_1083.054483_386	-	342190	342498	309	EIF1, SUI1	CDS	K03113	translation initiation factor 1
NODE_1_length_1538194_cov_1083.054483_387	+	342846	343871	1026	ABC.SN.S	CDS	K02051	NitT/TauT family transport system substrate-binding protein
NODE_1_length_1538194_cov_1083.054483_388	+	343886	344212	327		CDS
NODE_1_length_1538194_cov_1083.054483_389	+	344280	344708	429	troR	CDS	K03709	DtxR family transcriptional regulator, Mn-dependent transcriptional regulator
NODE_1_length_1538194_cov_1083.054483_390	+	344705	345148	444		CDS
NODE_1_length_1538194_cov_1083.054483_391	+	345160	347127	1968	feoB	CDS	K04759	ferrous iron transport protein B
NODE_1_length_1538194_cov_1083.054483_392	-	347111	347596	486	E2.7.7.53	CDS	K19710	ATP adenylyltransferase [EC:2.7.7.53]
NODE_1_length_1538194_cov_1083.054483_393	-	347739	348746	1008		CDS
NODE_1_length_1538194_cov_1083.054483_394	-	348760	349137	378		CDS
NODE_1_length_1538194_cov_1083.054483_395	-	349151	350587	1437	TC.SSS	CDS	K03307	solute:Na+ symporter, SSS family
NODE_1_length_1538194_cov_1083.054483_396	+	350861	353476	2616		CDS
NODE_1_length_1538194_cov_1083.054483_397	+	353543	354205	663		CDS
NODE_1_length_1538194_cov_1083.054483_398	-	354271	355221	951		CDS
NODE_1_length_1538194_cov_1083.054483_399	+	355281	356186	906		CDS
NODE_1_length_1538194_cov_1083.054483_400	+	356409	357173	765		CDS
NODE_1_length_1538194_cov_1083.054483_401	+	357321	358250	930	ispB	CDS	K02523	octaprenyl-diphosphate synthase [EC:2.5.1.90]
NODE_1_length_1538194_cov_1083.054483_402	+	358836	359723	888		CDS
NODE_1_length_1538194_cov_1083.054483_403	-	359724	360506	783		CDS
NODE_1_length_1538194_cov_1083.054483_404	-	360503	360886	384		CDS
NODE_1_length_1538194_cov_1083.054483_405	+	361000	362055	1056	INO1, ISYNA1	CDS	K01858	myo-inositol-1-phosphate synthase [EC:5.5.1.4]
NODE_1_length_1538194_cov_1083.054483_406	+	362140	362559	420		CDS
NODE_1_length_1538194_cov_1083.054483_407	-	363048	363983	936		CDS
NODE_1_length_1538194_cov_1083.054483_408	-	363980	364945	966	DHPS, dys	CDS	K00809	deoxyhypusine synthase [EC:2.5.1.46]
NODE_1_length_1538194_cov_1083.054483_409	-	364938	365612	675		CDS
NODE_1_length_1538194_cov_1083.054483_410	+	365693	365962	270	K06975	CDS	K06975	uncharacterized protein
NODE_1_length_1538194_cov_1083.054483_411	+	365959	366543	585	spoIIM	CDS	K06384	stage II sporulation protein M
NODE_1_length_1538194_cov_1083.054483_412	-	366533	367570	1038	moeA	CDS	K03750	molybdopterin molybdotransferase [EC:2.10.1.1]
NODE_1_length_1538194_cov_1083.054483_413	+	367652	368566	915	tupA, vupA	CDS	K05772	tungstate transport system substrate-binding protein
NODE_1_length_1538194_cov_1083.054483_414	+	368582	369292	711	tupB, vupB	CDS	K05773	tungstate transport system permease protein
NODE_1_length_1538194_cov_1083.054483_415	+	369301	370023	723	tupC, vupC	CDS	K06857	tungstate transport system ATP-binding protein [EC:7.3.2.6]
NODE_1_length_1538194_cov_1083.054483_416	-	369998	370333	336		CDS
NODE_1_length_1538194_cov_1083.054483_417	+	370435	370962	528		CDS
NODE_1_length_1538194_cov_1083.054483_418	+	370977	371189	213		CDS
NODE_1_length_1538194_cov_1083.054483_419	-	371280	371888	609	HSP20	CDS	K13993	HSP20 family protein
NODE_1_length_1538194_cov_1083.054483_420	+	372010	372741	732	queG	CDS	K18979	epoxyqueuosine reductase [EC:1.17.99.6]
NODE_1_length_1538194_cov_1083.054483_421	+	372811	373440	630		CDS
NODE_1_length_1538194_cov_1083.054483_422	-	373412	373765	354		CDS
NODE_1_length_1538194_cov_1083.054483_423	+	373961	374644	684	gph	CDS	K01091	phosphoglycolate phosphatase [EC:3.1.3.18]
NODE_1_length_1538194_cov_1083.054483_424	-	374641	375924	1284	SARS, serS	CDS	K01875	seryl-tRNA synthetase [EC:6.1.1.11]
NODE_1_length_1538194_cov_1083.054483_425	-	375934	376524	591	fucA	CDS	K01628	L-fuculose-phosphate aldolase [EC:4.1.2.17]
NODE_1_length_1538194_cov_1083.054483_426	+	376694	377755	1062	thiI	CDS	K03151	tRNA uracil 4-sulfurtransferase [EC:2.8.1.4]
NODE_1_length_1538194_cov_1083.054483_427	-	377724	378362	639	thiI	CDS	K03151	tRNA uracil 4-sulfurtransferase [EC:2.8.1.4]
NODE_1_length_1538194_cov_1083.054483_428	+	378439	378927	489		CDS
NODE_1_length_1538194_cov_1083.054483_429	+	378988	379596	609		CDS
NODE_1_length_1538194_cov_1083.054483_430	-	379913	380359	447	nikR	CDS	K07722	CopG family transcriptional regulator, nickel-responsive regulator
NODE_1_length_1538194_cov_1083.054483_431	+	380486	381733	1248	leuC, IPMI-L	CDS	K01703	3-isopropylmalate/(R)-2-methylmalate dehydratase large subunit [EC:4.2.1.33 4.2.1.35]
NODE_1_length_1538194_cov_1083.054483_432	+	381736	382251	516	leuD, IPMI-S	CDS	K01704	3-isopropylmalate/(R)-2-methylmalate dehydratase small subunit [EC:4.2.1.33 4.2.1.35]
NODE_1_length_1538194_cov_1083.054483_433	+	382230	383237	1008	IDH3	CDS	K00030	isocitrate dehydrogenase (NAD+) [EC:1.1.1.41]
NODE_1_length_1538194_cov_1083.054483_434	-	383391	384803	1413	lysC	CDS	K00928	aspartate kinase [EC:2.7.2.4]
NODE_1_length_1538194_cov_1083.054483_435	-	384825	385898	1074	asd	CDS	K00133	aspartate-semialdehyde dehydrogenase [EC:1.2.1.11]
NODE_1_length_1538194_cov_1083.054483_436	+	386210	387166	957	radA	CDS	K04483	DNA repair protein RadA
NODE_1_length_1538194_cov_1083.054483_437	-	387221	388228	1008	leuB, IMDH	CDS	K00052	3-isopropylmalate dehydrogenase [EC:1.1.1.85]
NODE_1_length_1538194_cov_1083.054483_438	-	388225	388752	528	leuD, IPMI-S	CDS	K01704	3-isopropylmalate/(R)-2-methylmalate dehydratase small subunit [EC:4.2.1.33 4.2.1.35]
NODE_1_length_1538194_cov_1083.054483_439	-	388758	390008	1251	leuC, IPMI-L	CDS	K01703	3-isopropylmalate/(R)-2-methylmalate dehydratase large subunit [EC:4.2.1.33 4.2.1.35]
NODE_1_length_1538194_cov_1083.054483_440	-	390311	391186	876	napH	CDS	K02574	ferredoxin-type protein NapH
NODE_1_length_1538194_cov_1083.054483_441	-	391183	391776	594		CDS
NODE_1_length_1538194_cov_1083.054483_442	+	391918	392469	552		CDS
NODE_1_length_1538194_cov_1083.054483_443	-	392459	393322	864	lysX	CDS	K05827	[lysine-biosynthesis-protein LysW]---L-2-aminoadipate ligase [EC:6.3.2.43]
NODE_1_length_1538194_cov_1083.054483_444	-	393327	393497	171	lysW	CDS	K05826	alpha-aminoadipate/glutamate carrier protein LysW
NODE_1_length_1538194_cov_1083.054483_445	-	393584	394552	969	recJ	CDS	K07462	single-stranded-DNA-specific exonuclease [EC:3.1.-.-]
NODE_1_length_1538194_cov_1083.054483_446	-	394587	395810	1224	VPS4	CDS	K12196	vacuolar protein-sorting-associated protein 4
NODE_1_length_1538194_cov_1083.054483_447	-	395788	396615	828		CDS
NODE_1_length_1538194_cov_1083.054483_448	-	396727	397365	639		CDS
NODE_1_length_1538194_cov_1083.054483_449	+	397464	398804	1341		CDS
NODE_1_length_1538194_cov_1083.054483_450	-	398847	399053	207		CDS
NODE_1_length_1538194_cov_1083.054483_451	+	399295	400452	1158	sufS	CDS	K11717	cysteine desulfurase / selenocysteine lyase [EC:2.8.1.7 4.4.1.16]
NODE_1_length_1538194_cov_1083.054483_452	+	400881	401972	1092		CDS
NODE_1_length_1538194_cov_1083.054483_453	-	402058	403125	1068	E3.5.5.1	CDS	K01501	nitrilase [EC:3.5.5.1]
NODE_1_length_1538194_cov_1083.054483_454	-	403173	404078	906	korB, oorB, oforB	CDS	K00175	2-oxoglutarate/2-oxoacid ferredoxin oxidoreductase subunit beta [EC:1.2.7.3 1.2.7.11]
NODE_1_length_1538194_cov_1083.054483_455	-	404080	405972	1893	korA, oorA, oforA	CDS	K00174	2-oxoglutarate/2-oxoacid ferredoxin oxidoreductase subunit alpha [EC:1.2.7.3 1.2.7.11]
NODE_1_length_1538194_cov_1083.054483_456	+	406389	406667	279	K09131	CDS	K09131	uncharacterized protein
NODE_1_length_1538194_cov_1083.054483_457	+	406696	407676	981	ABC.PE.P	CDS	K02033	peptide/nickel transport system permease protein
NODE_1_length_1538194_cov_1083.054483_458	+	407687	408649	963	ABC.PE.P1	CDS	K02034	peptide/nickel transport system permease protein
NODE_1_length_1538194_cov_1083.054483_459	+	408652	409620	969	ddpD	CDS	K02031	peptide/nickel transport system ATP-binding protein
NODE_1_length_1538194_cov_1083.054483_460	+	409625	410617	993	ddpF	CDS	K02032	peptide/nickel transport system ATP-binding protein
NODE_1_length_1538194_cov_1083.054483_461	+	410748	411236	489		CDS
NODE_1_length_1538194_cov_1083.054483_462	+	411369	413147	1779	ABC.PE.S	CDS	K02035	peptide/nickel transport system substrate-binding protein
NODE_1_length_1538194_cov_1083.054483_463	-	413269	413610	342		CDS
NODE_1_length_1538194_cov_1083.054483_464	+	413677	414576	900		CDS
NODE_1_length_1538194_cov_1083.054483_465	+	414698	415090	393		CDS
NODE_1_length_1538194_cov_1083.054483_466	-	415080	415757	678		CDS
NODE_1_length_1538194_cov_1083.054483_467	-	415771	417315	1545	TOP1	CDS	K03163	DNA topoisomerase I [EC:5.6.2.1]
NODE_1_length_1538194_cov_1083.054483_468	+	417533	419284	1752	SMC5	CDS	K22803	structural maintenance of chromosomes protein 5
NODE_1_length_1538194_cov_1083.054483_469	+	419226	420074	849		CDS
NODE_1_length_1538194_cov_1083.054483_470	+	420071	420661	591		CDS
NODE_1_length_1538194_cov_1083.054483_471	-	420658	423549	2892	lhr	CDS	K03724	ATP-dependent helicase Lhr and Lhr-like helicase [EC:3.6.4.13 5.6.2.4]
NODE_1_length_1538194_cov_1083.054483_472	+	423632	424174	543		CDS
NODE_1_length_1538194_cov_1083.054483_473	-	424180	425100	921	trxB, TRR	CDS	K00384	thioredoxin reductase (NADPH) [EC:1.8.1.9]
NODE_1_length_1538194_cov_1083.054483_474	+	425176	425508	333	hcaC	CDS	K05710	3-phenylpropionate/trans-cinnamate dioxygenase ferredoxin component
NODE_1_length_1538194_cov_1083.054483_475	+	425530	426918	1389	mtr	CDS	K17883	mycothione reductase [EC:1.8.1.15]
NODE_1_length_1538194_cov_1083.054483_476	-	426972	427718	747	ABC-2.P	CDS	K01992	ABC-2 type transport system permease protein
NODE_1_length_1538194_cov_1083.054483_477	-	427715	428689	975	ABC-2.A	CDS	K01990	ABC-2 type transport system ATP-binding protein
NODE_1_length_1538194_cov_1083.054483_478	+	428903	429211	309		CDS
NODE_1_length_1538194_cov_1083.054483_479	+	429293	429547	255		CDS
NODE_1_length_1538194_cov_1083.054483_480	+	429550	429810	261		CDS
NODE_1_length_1538194_cov_1083.054483_481	+	429930	431192	1263		CDS
NODE_1_length_1538194_cov_1083.054483_482	+	431203	432645	1443		CDS
NODE_1_length_1538194_cov_1083.054483_483	+	432660	433661	1002		CDS
NODE_1_length_1538194_cov_1083.054483_484	+	433727	434020	294	nrdH	CDS	K06191	glutaredoxin-like protein NrdH
NODE_1_length_1538194_cov_1083.054483_485	+	434017	434595	579		CDS
NODE_1_length_1538194_cov_1083.054483_486	-	434600	434752	153		CDS
NODE_1_length_1538194_cov_1083.054483_487	-	434890	435624	735		CDS
NODE_1_length_1538194_cov_1083.054483_488	-	435760	436854	1095	dbh	CDS	K04479	DNA polymerase IV (archaeal DinB-like DNA polymerase) [EC:2.7.7.7]
NODE_1_length_1538194_cov_1083.054483_489	-	436937	437356	420		CDS
NODE_1_length_1538194_cov_1083.054483_490	-	437427	438533	1107	gcvT, AMT	CDS	K00605	aminomethyltransferase [EC:2.1.2.10]
NODE_1_length_1538194_cov_1083.054483_491	-	438625	440574	1950	moeA	CDS	K03750	molybdopterin molybdotransferase [EC:2.10.1.1]
NODE_1_length_1538194_cov_1083.054483_492	-	440576	441826	1251	moeA	CDS	K03750	molybdopterin molybdotransferase [EC:2.10.1.1]
NODE_1_length_1538194_cov_1083.054483_493	-	441909	442361	453		CDS
NODE_1_length_1538194_cov_1083.054483_494	+	442529	443893	1365	toa	CDS	K15372	taurine---2-oxoglutarate transaminase [EC:2.6.1.55]
NODE_1_length_1538194_cov_1083.054483_495	-	443936	445258	1323	pmbA	CDS	K03592	PmbA protein
NODE_1_length_1538194_cov_1083.054483_496	+	445356	446360	1005	MVK, mvaK1	CDS	K00869	mevalonate kinase [EC:2.7.1.36]
NODE_1_length_1538194_cov_1083.054483_497	-	446335	446811	477	K06940	CDS	K06940	uncharacterized protein
NODE_1_length_1538194_cov_1083.054483_498	+	446976	447386	411		CDS
NODE_1_length_1538194_cov_1083.054483_499	-	447478	448050	573		CDS
NODE_1_length_1538194_cov_1083.054483_500	+	448135	449184	1050		CDS
NODE_1_length_1538194_cov_1083.054483_501	+	449206	449688	483		CDS
NODE_1_length_1538194_cov_1083.054483_502	-	449706	450893	1188		CDS
NODE_1_length_1538194_cov_1083.054483_503	-	451048	452400	1353	purB, ADSL	CDS	K01756	adenylosuccinate lyase [EC:4.3.2.2]
NODE_1_length_1538194_cov_1083.054483_504	-	452480	453040	561		CDS
NODE_1_length_1538194_cov_1083.054483_505	-	453201	454295	1095	mtaA	CDS	K14080	[methyl-Co(III) methanol/glycine betaine-specific corrinoid protein]:coenzyme M methyltransferase [EC:2.1.1.246 2.1.1.377]
NODE_1_length_1538194_cov_1083.054483_506	+	454423	455469	1047		CDS
NODE_1_length_1538194_cov_1083.054483_507	-	455466	456488	1023		CDS
NODE_1_length_1538194_cov_1083.054483_508	-	456485	457081	597		CDS
NODE_1_length_1538194_cov_1083.054483_509	+	457169	458800	1632		CDS
NODE_1_length_1538194_cov_1083.054483_510	-	458905	459732	828	mtaC	CDS	K14081	methanol corrinoid protein
NODE_1_length_1538194_cov_1083.054483_511	-	459744	461132	1389	mtaB	CDS	K04480	methanol---5-hydroxybenzimidazolylcobamide Co-methyltransferase [EC:2.1.1.90]
NODE_1_length_1538194_cov_1083.054483_512	+	461569	461934	366		CDS
NODE_1_length_1538194_cov_1083.054483_513	+	461931	463484	1554	Proton-conducting membrane transporter	CDS
NODE_1_length_1538194_cov_1083.054483_514	+	463484	464011	528	4Fe-4S dicluster domain	CDS	K07307
NODE_1_length_1538194_cov_1083.054483_515	+	464011	464364	354	hdrC	CDS		heterodisulfide reductase subunit C
NODE_1_length_1538194_cov_1083.054483_516	+	464376	465275	900	hdrB2	CDS	K03389	heterodisulfide reductase subunit B2 [EC:1.8.7.3 1.8.98.4 1.8.98.5 1.8.98.6]
NODE_1_length_1538194_cov_1083.054483_517	+	465276	466985	1710	Membrane bound hydrogenase subunit	CDS
NODE_1_length_1538194_cov_1083.054483_518	+	466979	467953	975	nuoH	CDS	K00337	NADH-quinone oxidoreductase subunit H [EC:7.1.1.2]
NODE_1_length_1538194_cov_1083.054483_519	+	467955	468542	588	hyfH	CDS	K12143	hydrogenase-4 component H/4Fe-4S cluster
NODE_1_length_1538194_cov_1083.054483_520	+	468542	468988	447	echC	CDS	K14088	ech hydrogenase subunit C/4Fe-4S ferredoxin
NODE_1_length_1538194_cov_1083.054483_521	+	469093	469332	240		CDS
NODE_1_length_1538194_cov_1083.054483_522	+	469362	469676	315		CDS
NODE_1_length_1538194_cov_1083.054483_523	-	469728	470018	291		CDS
NODE_1_length_1538194_cov_1083.054483_524	+	470122	471270	1149	purM	CDS	K01933	phosphoribosylformylglycinamidine cyclo-ligase [EC:6.3.3.1]
NODE_1_length_1538194_cov_1083.054483_525	+	471311	472468	1158	K10907	CDS	K10907	aminotransferase [EC:2.6.1.-]
NODE_1_length_1538194_cov_1083.054483_526	+	472527	473132	606		CDS
NODE_1_length_1538194_cov_1083.054483_527	-	473144	474187	1044		CDS
NODE_1_length_1538194_cov_1083.054483_528	+	474464	475546	1083	pstS	CDS	K02040	phosphate transport system substrate-binding protein
NODE_1_length_1538194_cov_1083.054483_529	+	475560	476492	933	pstC	CDS	K02037	phosphate transport system permease protein
NODE_1_length_1538194_cov_1083.054483_530	+	476489	477331	843	pstA	CDS	K02038	phosphate transport system permease protein
NODE_1_length_1538194_cov_1083.054483_531	+	477335	478087	753	pstB	CDS	K02036	phosphate transport system ATP-binding protein [EC:7.3.2.1]
NODE_1_length_1538194_cov_1083.054483_532	+	478105	478746	642	phoU	CDS	K02039	phosphate transport system protein
NODE_1_length_1538194_cov_1083.054483_533	-	478755	480053	1299		CDS
NODE_1_length_1538194_cov_1083.054483_534	+	480381	481583	1203	LYSN	CDS	K05825	2-aminoadipate transaminase [EC:2.6.1.-]
NODE_1_length_1538194_cov_1083.054483_535	-	481610	481708	99		CDS
NODE_1_length_1538194_cov_1083.054483_536	-	481711	482184	474	K07034	CDS	K07034	uncharacterized protein
NODE_1_length_1538194_cov_1083.054483_537	+	482249	483091	843	prsW	CDS	K24131	protease PrsW [EC:3.4.-.-]
NODE_1_length_1538194_cov_1083.054483_538	+	483111	483494	384	trxA	CDS	K03671	thioredoxin 1
NODE_1_length_1538194_cov_1083.054483_539	-	483476	484270	795	purQ	CDS	K23265	phosphoribosylformylglycinamidine synthase subunit PurQ / glutaminase [EC:6.3.5.3 3.5.1.2]
NODE_1_length_1538194_cov_1083.054483_540	-	484270	486618	2349	purSL	CDS	K23270	phosphoribosylformylglycinamidine synthase subunit PurSL [EC:6.3.5.3]
NODE_1_length_1538194_cov_1083.054483_541	-	486599	486862	264	purS	CDS	K23264	phosphoribosylformylglycinamidine synthase subunit PurS [EC:6.3.5.3]
NODE_1_length_1538194_cov_1083.054483_542	-	486859	487347	489	purE	CDS	K01588	5-(carboxyamino)imidazole ribonucleotide mutase [EC:5.4.99.18]
NODE_1_length_1538194_cov_1083.054483_543	-	487344	488714	1371	purT	CDS	K08289	phosphoribosylglycinamide formyltransferase 2 [EC:6.3.1.21]
NODE_1_length_1538194_cov_1083.054483_544	-	488747	490231	1485	purD	CDS	K01945	phosphoribosylamine---glycine ligase [EC:6.3.4.13]
NODE_1_length_1538194_cov_1083.054483_545	-	490232	491545	1314	purF, PPAT	CDS	K00764	amidophosphoribosyltransferase [EC:2.4.2.14]
NODE_1_length_1538194_cov_1083.054483_546	-	491559	493022	1464	purF, PPAT	CDS	K00764	amidophosphoribosyltransferase [EC:2.4.2.14]
NODE_1_length_1538194_cov_1083.054483_547	+	493229	494425	1197	hemA	CDS	K02492	glutamyl-tRNA reductase [EC:1.2.1.70]
NODE_1_length_1538194_cov_1083.054483_548	+	494415	495386	972	hemB, ALAD	CDS	K01698	porphobilinogen synthase [EC:4.2.1.24]
NODE_1_length_1538194_cov_1083.054483_549	+	495383	496645	1263	hemL	CDS	K01845	glutamate-1-semialdehyde 2,1-aminomutase [EC:5.4.3.8]
NODE_1_length_1538194_cov_1083.054483_550	+	496642	497553	912	hemC, HMBS	CDS	K01749	hydroxymethylbilane synthase [EC:2.5.1.61]
NODE_1_length_1538194_cov_1083.054483_551	+	497550	498260	711	cobA	CDS	K02303	uroporphyrin-III C-methyltransferase [EC:2.1.1.107]
NODE_1_length_1538194_cov_1083.054483_552	+	498257	499012	756		CDS
NODE_1_length_1538194_cov_1083.054483_553	+	499036	499413	378	cfbA	CDS	K22011	sirohydrochlorin cobalto/nickelchelatase [EC:4.99.1.3 4.99.1.11]
NODE_1_length_1538194_cov_1083.054483_554	+	499410	500693	1284	cfbE	CDS	K21612	coenzyme F430 synthetase [EC:6.4.1.9]
NODE_1_length_1538194_cov_1083.054483_555	+	500695	501777	1083	cfbD	CDS	K21611	Ni-sirohydrochlorin a,c-diamide reductive cyclase subunit CfbD [EC:6.3.3.7]
NODE_1_length_1538194_cov_1083.054483_556	+	501774	502559	786	nifH	CDS	K02588	nitrogenase iron protein NifH
NODE_1_length_1538194_cov_1083.054483_557	+	502546	503913	1368	cobB-cbiA	CDS	K02224	cobyrinic acid a,c-diamide synthase [EC:6.3.5.9 6.3.5.11]
NODE_1_length_1538194_cov_1083.054483_558	-	503917	504363	447	sirC	CDS	K24866	precorrin-2 dehydrogenase [EC:1.3.1.76]
NODE_1_length_1538194_cov_1083.054483_559	+	504471	505841	1371	ABC.PE.S	CDS	K02035	peptide/nickel transport system substrate-binding protein
NODE_1_length_1538194_cov_1083.054483_560	+	506153	507160	1008		CDS
NODE_1_length_1538194_cov_1083.054483_561	+	507181	508638	1458		CDS
NODE_1_length_1538194_cov_1083.054483_562	-	508707	509639	933	purC	CDS	K01923	phosphoribosylaminoimidazole-succinocarboxamide synthase [EC:6.3.2.6]
NODE_1_length_1538194_cov_1083.054483_563	+	509885	510388	504		CDS
NODE_1_length_1538194_cov_1083.054483_564	+	510402	511436	1035	ABC-2.A	CDS	K01990	ABC-2 type transport system ATP-binding protein
NODE_1_length_1538194_cov_1083.054483_565	+	511433	512383	951	ABC-2.P	CDS	K01992	ABC-2 type transport system permease protein
NODE_1_length_1538194_cov_1083.054483_566	-	512426	513235	810		CDS
NODE_1_length_1538194_cov_1083.054483_567	+	513368	514324	957	znuA	CDS	K09815	zinc transport system substrate-binding protein
NODE_1_length_1538194_cov_1083.054483_568	+	514438	515217	780	znuC	CDS	K09817	zinc transport system ATP-binding protein [EC:7.2.2.20]
NODE_1_length_1538194_cov_1083.054483_569	+	515210	516031	822	znuB	CDS	K09816	zinc transport system permease protein
NODE_1_length_1538194_cov_1083.054483_570	+	516249	516644	396	nikR	CDS	K07722	CopG family transcriptional regulator, nickel-responsive regulator
NODE_1_length_1538194_cov_1083.054483_571	+	516931	518883	1953	ACSS1_2, acs	CDS	K01895	acetyl-CoA synthetase [EC:6.2.1.1]
NODE_1_length_1538194_cov_1083.054483_572	+	518912	519841	930	trxB, TRR	CDS	K00384	thioredoxin reductase (NADPH) [EC:1.8.1.9]
NODE_1_length_1538194_cov_1083.054483_573	+	520014	520352	339	nuoA	CDS	K22518
NODE_1_length_1538194_cov_1083.054483_574	+	520354	520797	444	echC	CDS	K22518	ech hydrogenase subunit C/nuoB
NODE_1_length_1538194_cov_1083.054483_575	+	520794	521252	459	nuoC	CDS	K22518
NODE_1_length_1538194_cov_1083.054483_576	+	521249	522382	1134	NADH-ubiquinone oxidoreductase chain?	CDS	K22518
NODE_1_length_1538194_cov_1083.054483_577	+	522385	523362	978	nuoH	CDS	K22518	NADH-quinone oxidoreductase subunit H [EC:7.1.1.2]
NODE_1_length_1538194_cov_1083.054483_578	+	523362	523700	339	NADH-quinone oxidoreductase subunit I	CDS	K22518
NODE_1_length_1538194_cov_1083.054483_579	+	523704	523940	237	NADH-quinone oxidoreductase subunit J	CDS	K22518
NODE_1_length_1538194_cov_1083.054483_580	+	523940	524275	336		CDS
NODE_1_length_1538194_cov_1083.054483_581	+	524268	524570	303	nuoK	CDS	K22518	NADH-quinone oxidoreductase subunit K [EC:7.1.1.2]
NODE_1_length_1538194_cov_1083.054483_582	+	524564	526072	1509	mnhD, mrpD	CDS	K05568	multicomponent Na+:H+ antiporter subunit D
NODE_1_length_1538194_cov_1083.054483_583	+	526076	528130	2055	nuoL	CDS	K22518	NADH-quinone oxidoreductase subunit L [EC:7.1.1.2]
NODE_1_length_1538194_cov_1083.054483_584	+	528127	529581	1455	nuoM	CDS	K22518	NADH-quinone oxidoreductase subunit M [EC:7.1.1.2]
NODE_1_length_1538194_cov_1083.054483_585	-	529791	530420	630	mgtC	CDS	K07507	putative Mg2+ transporter-C (MgtC) family protein
NODE_1_length_1538194_cov_1083.054483_586	+	530578	531435	858		CDS
NODE_1_length_1538194_cov_1083.054483_587	+	531528	532556	1029	SORD, gutB	CDS	K00008	L-iditol 2-dehydrogenase [EC:1.1.1.14]
NODE_1_length_1538194_cov_1083.054483_588	+	532634	533788	1155	trpD	CDS	K00766	anthranilate phosphoribosyltransferase [EC:2.4.2.18]
NODE_1_length_1538194_cov_1083.054483_589	+	533843	534172	330		CDS
NODE_1_length_1538194_cov_1083.054483_590	+	534831	535193	363		CDS
NODE_1_length_1538194_cov_1083.054483_591	+	535426	536094	669		CDS
NODE_1_length_1538194_cov_1083.054483_592	+	536319	537041	723		CDS
NODE_1_length_1538194_cov_1083.054483_593	+	537175	538650	1476	DLD, lpd, pdhD	CDS	K00382	dihydrolipoamide dehydrogenase [EC:1.8.1.4]
NODE_1_length_1538194_cov_1083.054483_594	-	538913	539263	351		CDS
NODE_1_length_1538194_cov_1083.054483_595	-	539394	539654	261		CDS
NODE_1_length_1538194_cov_1083.054483_596	-	539759	540154	396		CDS
NODE_1_length_1538194_cov_1083.054483_597	-	540151	540381	231		CDS
NODE_1_length_1538194_cov_1083.054483_598	+	541010	541909	900		CDS
NODE_1_length_1538194_cov_1083.054483_599	-	542035	545190	3156		CDS
NODE_1_length_1538194_cov_1083.054483_600	-	545276	547927	2652	K07445	CDS	K07445	putative DNA methylase
NODE_1_length_1538194_cov_1083.054483_601	-	547995	548558	564		CDS
NODE_1_length_1538194_cov_1083.054483_602	-	548645	551257	2613		CDS
NODE_1_length_1538194_cov_1083.054483_603	+	551527	552483	957		CDS
NODE_1_length_1538194_cov_1083.054483_604	+	552503	552688	186		CDS
NODE_1_length_1538194_cov_1083.054483_605	-	553973	554239	267		CDS
NODE_1_length_1538194_cov_1083.054483_606	+	554392	554847	456		CDS
NODE_1_length_1538194_cov_1083.054483_607	+	555109	555339	231		CDS
NODE_1_length_1538194_cov_1083.054483_608	+	555352	555771	420		CDS
NODE_1_length_1538194_cov_1083.054483_609	-	555849	556583	735		CDS
NODE_1_length_1538194_cov_1083.054483_610	+	556761	557651	891		CDS
NODE_1_length_1538194_cov_1083.054483_611	+	558236	558451	216		CDS
NODE_1_length_1538194_cov_1083.054483_612	+	558618	559712	1095	K07027	CDS	K07027	glycosyltransferase 2 family protein
NODE_1_length_1538194_cov_1083.054483_613	+	559877	560842	966		CDS
NODE_1_length_1538194_cov_1083.054483_614	+	561049	561279	231		CDS
NODE_1_length_1538194_cov_1083.054483_615	-	561394	563469	2076	sbcC, rad50	CDS	K03546	DNA repair protein SbcC/Rad50
NODE_1_length_1538194_cov_1083.054483_616	-	563466	564806	1341	sbcD, mre11	CDS	K03547	DNA repair protein SbcD/Mre11
NODE_1_length_1538194_cov_1083.054483_617	-	564894	566471	1578		CDS
NODE_1_length_1538194_cov_1083.054483_618	-	566530	567576	1047		CDS
NODE_1_length_1538194_cov_1083.054483_619	-	567825	568109	285		CDS
NODE_1_length_1538194_cov_1083.054483_620	-	568110	568745	636		CDS
NODE_1_length_1538194_cov_1083.054483_621	-	568929	570002	1074		CDS
NODE_1_length_1538194_cov_1083.054483_622	+	570104	571060	957		CDS
NODE_1_length_1538194_cov_1083.054483_623	-	571154	571816	663	hisIE	CDS	K11755	phosphoribosyl-AMP cyclohydrolase / phosphoribosyl-ATP pyrophosphohydrolase [EC:3.5.4.19 3.6.1.31]
NODE_1_length_1538194_cov_1083.054483_624	-	571865	572677	813	hisF	CDS	K02500	imidazole glycerol-phosphate synthase subunit HisF [EC:4.3.2.10]
NODE_1_length_1538194_cov_1083.054483_625	-	572674	573387	714	hisA	CDS	K01814	phosphoribosylformimino-5-aminoimidazole carboxamide ribotide isomerase [EC:5.3.1.16]
NODE_1_length_1538194_cov_1083.054483_626	-	573384	574043	660	hisH	CDS	K02501	imidazole glycerol-phosphate synthase subunit HisH [EC:4.3.2.10]
NODE_1_length_1538194_cov_1083.054483_627	-	574048	574662	615	hisB	CDS	K01693	imidazoleglycerol-phosphate dehydratase [EC:4.2.1.19]
NODE_1_length_1538194_cov_1083.054483_628	-	574659	575759	1101	hisC	CDS	K00817	histidinol-phosphate aminotransferase [EC:2.6.1.9]
NODE_1_length_1538194_cov_1083.054483_629	-	575759	577048	1290	hisD	CDS	K00013	histidinol dehydrogenase [EC:1.1.1.23]
NODE_1_length_1538194_cov_1083.054483_630	-	577045	577692	648	hisG	CDS	K00765	ATP phosphoribosyltransferase [EC:2.4.2.17]
NODE_1_length_1538194_cov_1083.054483_631	-	577682	578779	1098	hisZ	CDS	K02502	ATP phosphoribosyltransferase regulatory subunit
NODE_1_length_1538194_cov_1083.054483_632	+	578979	579299	321		CDS
NODE_1_length_1538194_cov_1083.054483_633	+	579503	581674	2172	nrdD	CDS	K21636	ribonucleoside-triphosphate reductase (formate) [EC:1.1.98.6]
NODE_1_length_1538194_cov_1083.054483_634	+	581671	582528	858	pflA, pflC, pflE	CDS	K04069	pyruvate formate lyase activating enzyme [EC:1.97.1.4]
NODE_1_length_1538194_cov_1083.054483_635	-	582588	584357	1770		CDS
NODE_1_length_1538194_cov_1083.054483_636	-	584459	584941	483		CDS
NODE_1_length_1538194_cov_1083.054483_637	+	584970	586685	1716	flaI	CDS	K07332	archaeal flagellar protein FlaI
NODE_1_length_1538194_cov_1083.054483_638	+	586675	588387	1713	flaJ	CDS	K07333	archaeal flagellar protein FlaJ
NODE_1_length_1538194_cov_1083.054483_639	-	588482	588745	264		CDS
NODE_1_length_1538194_cov_1083.054483_640	-	588849	589388	540	TRMO, trmO	CDS	K22900	tRNA (adenine37-N6)-methyltransferase [EC:2.1.1.-]
NODE_1_length_1538194_cov_1083.054483_641	-	589427	589723	297		CDS
NODE_1_length_1538194_cov_1083.054483_642	+	589791	590297	507	K06874	CDS	K06874	zinc finger protein
NODE_1_length_1538194_cov_1083.054483_643	-	590301	591437	1137	metB	CDS	K01739	cystathionine gamma-synthase [EC:2.5.1.48]
NODE_1_length_1538194_cov_1083.054483_644	+	591677	592141	465	rnhA, RNASEH1	CDS	K03469	ribonuclease HI [EC:3.1.26.4]
NODE_1_length_1538194_cov_1083.054483_645	+	592240	594687	2448		CDS
NODE_1_length_1538194_cov_1083.054483_646	+	594760	595662	903		CDS
NODE_1_length_1538194_cov_1083.054483_647	+	595714	596877	1164	GGR	CDS	K17830	digeranylgeranylglycerophospholipid reductase [EC:1.3.1.101 1.3.7.11]
NODE_1_length_1538194_cov_1083.054483_648	+	596974	598098	1125		CDS
NODE_1_length_1538194_cov_1083.054483_649	+	598181	598603	423		CDS
NODE_1_length_1538194_cov_1083.054483_650	-	598610	598939	330		CDS
NODE_1_length_1538194_cov_1083.054483_651	-	599079	599789	711	E3.5.2.10	CDS	K01470	creatinine amidohydrolase [EC:3.5.2.10]
NODE_1_length_1538194_cov_1083.054483_652	+	599910	601127	1218	ychF	CDS	K06942	ribosome-binding ATPase
NODE_1_length_1538194_cov_1083.054483_653	+	601179	601871	693		CDS
NODE_1_length_1538194_cov_1083.054483_654	+	601883	602416	534	nudF	CDS	K01515	ADP-ribose pyrophosphatase [EC:3.6.1.13 3.6.1.-]
NODE_1_length_1538194_cov_1083.054483_655	+	602423	602947	525		CDS
NODE_1_length_1538194_cov_1083.054483_656	+	603072	603467	396		CDS
NODE_1_length_1538194_cov_1083.054483_657	-	603511	604620	1110		CDS
NODE_1_length_1538194_cov_1083.054483_658	+	604754	605359	606	GRPE	CDS	K03687	molecular chaperone GrpE
NODE_1_length_1538194_cov_1083.054483_659	+	605361	607256	1896	dnaK, HSPA9	CDS	K04043	molecular chaperone DnaK
NODE_1_length_1538194_cov_1083.054483_660	+	607404	608531	1128	dnaJ	CDS	K03686	molecular chaperone DnaJ
NODE_1_length_1538194_cov_1083.054483_661	+	608757	608897	141		CDS
NODE_1_length_1538194_cov_1083.054483_662	+	609057	609824	768	hdrD	CDS	K08264	heterodisulfide reductase subunit D [EC:1.8.98.1]
NODE_1_length_1538194_cov_1083.054483_663	+	609821	611110	1290	lldG	CDS	K00782	L-lactate dehydrogenase complex protein LldG
NODE_1_length_1538194_cov_1083.054483_664	+	611471	611941	471		CDS
NODE_1_length_1538194_cov_1083.054483_665	+	613867	614028	162		CDS
NODE_1_length_1538194_cov_1083.054483_666	+	614115	614570	456		CDS
NODE_1_length_1538194_cov_1083.054483_667	+	614707	614877	171		CDS
NODE_1_length_1538194_cov_1083.054483_668	+	615155	617854	2700		CDS
NODE_1_length_1538194_cov_1083.054483_669	+	617859	618212	354		CDS
NODE_1_length_1538194_cov_1083.054483_670	+	618205	620799	2595	K07445	CDS	K07445	putative DNA methylase
NODE_1_length_1538194_cov_1083.054483_671	+	620812	623934	3123		CDS
NODE_1_length_1538194_cov_1083.054483_672	+	624226	625071	846	K07220	CDS	K07220	uncharacterized protein
NODE_1_length_1538194_cov_1083.054483_673	-	625144	626154	1011	TC.PIT	CDS	K03306	inorganic phosphate transporter, PiT family
NODE_1_length_1538194_cov_1083.054483_674	-	626438	626686	249		CDS
NODE_1_length_1538194_cov_1083.054483_675	-	626772	627557	786	K09163	CDS	K09163	uncharacterized protein
NODE_1_length_1538194_cov_1083.054483_676	-	627600	628196	597	marC	CDS	K05595	multiple antibiotic resistance protein
NODE_1_length_1538194_cov_1083.054483_677	+	628257	629429	1173	aspB	CDS	K00812	aspartate aminotransferase [EC:2.6.1.1]
NODE_1_length_1538194_cov_1083.054483_678	+	629832	630236	405		CDS
NODE_1_length_1538194_cov_1083.054483_679	-	630223	630600	378		CDS
NODE_1_length_1538194_cov_1083.054483_680	-	630612	631904	1293	paaK	CDS	K01912	phenylacetate-CoA ligase [EC:6.2.1.30]
NODE_1_length_1538194_cov_1083.054483_681	+	632024	633397	1374	bchE	CDS	K04034	anaerobic magnesium-protoporphyrin IX monomethyl ester cyclase [EC:1.21.98.3]
NODE_1_length_1538194_cov_1083.054483_682	-	633445	633990	546	xerD	CDS	K04763	integrase/recombinase XerD
NODE_1_length_1538194_cov_1083.054483_683	-	634011	634574	564	xerD	CDS	K04763	integrase/recombinase XerD
NODE_1_length_1538194_cov_1083.054483_684	-	634625	635182	558		CDS
NODE_1_length_1538194_cov_1083.054483_685	-	635169	635750	582		CDS
NODE_1_length_1538194_cov_1083.054483_686	+	636733	637530	798		CDS
NODE_1_length_1538194_cov_1083.054483_687	+	637675	638469	795		CDS
NODE_1_length_1538194_cov_1083.054483_688	-	638470	639351	882		CDS
NODE_1_length_1538194_cov_1083.054483_689	-	639556	639726	171		CDS
NODE_1_length_1538194_cov_1083.054483_690	-	639749	641809	2061	hppA	CDS	K15987	K(+)-stimulated pyrophosphate-energized sodium pump [EC:7.1.3.2]
NODE_1_length_1538194_cov_1083.054483_691	-	641968	643584	1617	Fumarate reductase flavoprotein C-term	CDS
NODE_1_length_1538194_cov_1083.054483_692	-	643635	643910	276	moaD, cysO	CDS	K03636	sulfur-carrier protein
NODE_1_length_1538194_cov_1083.054483_693	-	643950	645047	1098	K01622	CDS	K01622	fructose 1,6-bisphosphate aldolase/phosphatase [EC:4.1.2.13 3.1.3.11]
NODE_1_length_1538194_cov_1083.054483_694	-	645172	645426	255		CDS
NODE_1_length_1538194_cov_1083.054483_695	-	645420	646277	858	K07090	CDS	K07090	uncharacterized protein
NODE_1_length_1538194_cov_1083.054483_696	+	646312	648003	1692	ilvD	CDS	K01687	dihydroxy-acid dehydratase [EC:4.2.1.9]
NODE_1_length_1538194_cov_1083.054483_697	-	648715	648921	207		CDS
NODE_1_length_1538194_cov_1083.054483_698	-	649204	650421	1218	ABC.CD.P	CDS	K02004	putative ABC transport system permease protein
NODE_1_length_1538194_cov_1083.054483_699	-	650418	652154	1737		CDS
NODE_1_length_1538194_cov_1083.054483_700	-	652201	652917	717	ABC.CD.A	CDS	K02003	putative ABC transport system ATP-binding protein
NODE_1_length_1538194_cov_1083.054483_701	+	653211	654170	960		CDS
NODE_1_length_1538194_cov_1083.054483_702	+	654211	654864	654		CDS
NODE_1_length_1538194_cov_1083.054483_703	-	655048	655674	627		CDS
NODE_1_length_1538194_cov_1083.054483_704	+	655900	656616	717	thyX, thy1	CDS	K03465	thymidylate synthase (FAD) [EC:2.1.1.148]
NODE_1_length_1538194_cov_1083.054483_705	+	656733	660443	3711	recD	CDS	K03581	exodeoxyribonuclease V alpha subunit [EC:3.1.11.5]
NODE_1_length_1538194_cov_1083.054483_706	-	660918	661571	654	trkA, ktrA, ktrC	CDS	K03499	trk/ktr system potassium uptake protein
NODE_1_length_1538194_cov_1083.054483_707	+	661661	663112	1452	trkH, trkG, ktrB, ktrD	CDS	K03498	trk/ktr system potassium uptake protein
NODE_1_length_1538194_cov_1083.054483_708	+	663237	663644	408	paaI	CDS	K02614	acyl-CoA thioesterase [EC:3.1.2.-]
NODE_1_length_1538194_cov_1083.054483_709	-	663720	664187	468		CDS
NODE_1_length_1538194_cov_1083.054483_710	+	664470	664955	486		CDS
NODE_1_length_1538194_cov_1083.054483_711	+	665028	665378	351		CDS
NODE_1_length_1538194_cov_1083.054483_712	+	665468	666820	1353		CDS
NODE_1_length_1538194_cov_1083.054483_713	-	666905	667555	651	yrfG	CDS	K20881	GMP/IMP 5'-nucleotidase [EC:3.1.3.-]
NODE_1_length_1538194_cov_1083.054483_714	-	667573	668139	567		CDS
NODE_1_length_1538194_cov_1083.054483_715	-	668278	668874	597	inhA	CDS	K18199	cyclohexyl-isocyanide hydratase [EC:4.2.1.103]
NODE_1_length_1538194_cov_1083.054483_716	-	668973	669284	312	ssh10b	CDS	K03622	archaea-specific DNA-binding protein
NODE_1_length_1538194_cov_1083.054483_717	+	669405	669827	423		CDS
NODE_1_length_1538194_cov_1083.054483_718	-	669966	672986	3021		CDS
NODE_1_length_1538194_cov_1083.054483_719	+	673187	674563	1377	leuA, IMS	CDS	K01649	2-isopropylmalate synthase [EC:2.3.3.13]
NODE_1_length_1538194_cov_1083.054483_720	-	674681	674995	315		CDS
NODE_1_length_1538194_cov_1083.054483_721	+	675125	675673	549		CDS
NODE_1_length_1538194_cov_1083.054483_722	-	676072	676866	795	mtaP, MTAP	CDS	K00772	5'-methylthioadenosine phosphorylase [EC:2.4.2.28]
NODE_1_length_1538194_cov_1083.054483_723	-	676892	677560	669	K07101	CDS	K07101	uncharacterized protein
NODE_1_length_1538194_cov_1083.054483_724	-	677657	678877	1221	blt	CDS	K08153	MFS transporter, DHA1 family, multidrug resistance protein
NODE_1_length_1538194_cov_1083.054483_725	-	678884	679321	438	pspC	CDS	K03973	phage shock protein C
NODE_1_length_1538194_cov_1083.054483_726	-	679345	680616	1272	apgM	CDS	K15635	2,3-bisphosphoglycerate-independent phosphoglycerate mutase [EC:5.4.2.12]
NODE_1_length_1538194_cov_1083.054483_727	-	680683	681621	939		CDS
NODE_1_length_1538194_cov_1083.054483_728	+	681775	682317	543		CDS
NODE_1_length_1538194_cov_1083.054483_729	+	682402	683817	1416	tldD	CDS	K03568	TldD protein
NODE_1_length_1538194_cov_1083.054483_730	-	683842	684447	606		CDS
NODE_1_length_1538194_cov_1083.054483_731	+	684582	685436	855	K06897	CDS	K06897	7,8-dihydropterin-6-yl-methyl-4-(beta-D-ribofuranosyl)aminobenzene 5'-phosphate synthase [EC:2.5.1.105]
NODE_1_length_1538194_cov_1083.054483_732	+	685641	686936	1296	TC.NCS1	CDS	K03457	nucleobase:cation symporter-1, NCS1 family
NODE_1_length_1538194_cov_1083.054483_733	+	687015	687746	732	ABC-2.A	CDS	K01990	ABC-2 type transport system ATP-binding protein
NODE_1_length_1538194_cov_1083.054483_734	+	687739	689028	1290	ABC-2.P	CDS	K01992	ABC-2 type transport system permease protein
NODE_1_length_1538194_cov_1083.054483_735	-	689238	690416	1179		CDS
NODE_1_length_1538194_cov_1083.054483_736	+	690656	691012	357		CDS
NODE_1_length_1538194_cov_1083.054483_737	+	691064	691393	330		CDS
NODE_1_length_1538194_cov_1083.054483_738	+	691679	692557	879		CDS
NODE_1_length_1538194_cov_1083.054483_739	+	692554	693258	705		CDS
NODE_1_length_1538194_cov_1083.054483_740	-	693201	694352	1152		CDS
NODE_1_length_1538194_cov_1083.054483_741	+	694968	695894	927		CDS
NODE_1_length_1538194_cov_1083.054483_742	+	696012	696248	237		CDS
NODE_1_length_1538194_cov_1083.054483_743	+	696662	698599	1938	uvrD, pcrA	CDS	K03657	ATP-dependent DNA helicase UvrD/PcrA [EC:5.6.2.4]
NODE_1_length_1538194_cov_1083.054483_744	-	698850	699017	168		CDS
NODE_1_length_1538194_cov_1083.054483_745	-	700453	701031	579	cas4	CDS	K07464	CRISPR-associated exonuclease Cas4 [EC:3.1.12.1]
NODE_1_length_1538194_cov_1083.054483_746	-	701036	702061	1026	cas1	CDS	K15342	CRISP-associated protein Cas1
NODE_1_length_1538194_cov_1083.054483_747	-	702142	703023	882	csa1	CDS	K19085	CRISPR-associated protein Csa1
NODE_1_length_1538194_cov_1083.054483_748	-	703028	703315	288	cas2	CDS	K09951	CRISPR-associated protein Cas2
NODE_1_length_1538194_cov_1083.054483_749	-	705824	705931	108		CDS
NODE_1_length_1538194_cov_1083.054483_750	+	706188	706355	168		CDS
NODE_1_length_1538194_cov_1083.054483_751	-	706382	706981	600		CDS
NODE_1_length_1538194_cov_1083.054483_752	+	707153	707551	399		CDS
NODE_1_length_1538194_cov_1083.054483_753	+	707551	708579	1029	csa2	CDS	K19074	CRISPR-associated protein Csa2
NODE_1_length_1538194_cov_1083.054483_754	+	708601	709449	849	cas5a_b_c	CDS	K19089	CRISPR-associated protein Cas5a/b/c
NODE_1_length_1538194_cov_1083.054483_755	+	709526	711127	1602	cas3	CDS	K07012	CRISPR-associated endonuclease/helicase Cas3 [EC:3.1.-.- 5.6.2.4]
NODE_1_length_1538194_cov_1083.054483_756	+	711142	711846	705		CDS
NODE_1_length_1538194_cov_1083.054483_757	+	711839	713011	1173		CDS
NODE_1_length_1538194_cov_1083.054483_758	+	713048	713881	834	cas6	CDS	K19091	CRISPR-associated endoribonuclease Cas6 [EC:3.1.-.-]
NODE_1_length_1538194_cov_1083.054483_759	+	714165	715304	1140		CDS
NODE_1_length_1538194_cov_1083.054483_760	+	715301	716122	822		CDS
NODE_1_length_1538194_cov_1083.054483_761	+	716124	716870	747		CDS
NODE_1_length_1538194_cov_1083.054483_762	+	716875	718374	1500		CDS
NODE_1_length_1538194_cov_1083.054483_763	-	718553	718882	330	mazF, ndoA, chpA	CDS	K07171	mRNA interferase MazF [EC:3.1.-.-]
NODE_1_length_1538194_cov_1083.054483_764	-	718860	719183	324		CDS
NODE_1_length_1538194_cov_1083.054483_765	+	719270	719593	324		CDS
NODE_1_length_1538194_cov_1083.054483_766	-	719583	720752	1170		CDS
NODE_1_length_1538194_cov_1083.054483_767	-	720824	722734	1911	flaJ	CDS	K07333	archaeal flagellar protein FlaJ
NODE_1_length_1538194_cov_1083.054483_768	-	722744	724261	1518	flaI	CDS	K07332	archaeal flagellar protein FlaI
NODE_1_length_1538194_cov_1083.054483_769	-	724270	724743	474		CDS
NODE_1_length_1538194_cov_1083.054483_770	-	724749	725168	420		CDS
NODE_1_length_1538194_cov_1083.054483_771	-	725174	726352	1179		CDS
NODE_1_length_1538194_cov_1083.054483_772	-	726349	726819	471		CDS
NODE_1_length_1538194_cov_1083.054483_773	-	726959	727735	777		CDS
NODE_1_length_1538194_cov_1083.054483_774	-	727735	729018	1284	nreA	CDS	K22585	DNA repair protein NreA
NODE_1_length_1538194_cov_1083.054483_775	+	729155	730015	861	K07022	CDS	K07022	uncharacterized protein
NODE_1_length_1538194_cov_1083.054483_776	+	730216	730362	147		CDS
NODE_1_length_1538194_cov_1083.054483_777	-	730369	731175	807		CDS
NODE_1_length_1538194_cov_1083.054483_778	+	731301	733613	2313	copA, ctpA, ATP7	CDS	K17686	P-type Cu+ transporter [EC:7.2.2.8]
NODE_1_length_1538194_cov_1083.054483_779	-	733660	734088	429	asnC	CDS	K03718	Lrp/AsnC family transcriptional regulator, regulator for asnA, asnC and gidA
NODE_1_length_1538194_cov_1083.054483_780	+	734186	734800	615	K09126	CDS	K09126	uncharacterized protein
NODE_1_length_1538194_cov_1083.054483_781	-	734754	736172	1419	acdA	CDS	K01905	acetate---CoA ligase (ADP-forming) subunit alpha [EC:6.2.1.13]
NODE_1_length_1538194_cov_1083.054483_782	+	736313	737314	1002	K06935	CDS	K06935	uncharacterized protein
NODE_1_length_1538194_cov_1083.054483_783	-	737337	737699	363	padR	CDS	K10947	PadR family transcriptional regulator, regulatory protein PadR
NODE_1_length_1538194_cov_1083.054483_784	+	737767	739359	1593		CDS
NODE_1_length_1538194_cov_1083.054483_785	-	739685	740425	741		CDS
NODE_1_length_1538194_cov_1083.054483_786	-	740422	740778	357		CDS
NODE_1_length_1538194_cov_1083.054483_787	-	740765	741343	579	ABC-2.A	CDS	K01990	ABC-2 type transport system ATP-binding protein
NODE_1_length_1538194_cov_1083.054483_788	-	741929	742072	144		CDS
NODE_1_length_1538194_cov_1083.054483_789	+	742566	743105	540		CDS
NODE_1_length_1538194_cov_1083.054483_790	-	743164	743856	693		CDS
NODE_1_length_1538194_cov_1083.054483_791	+	743933	744697	765		CDS
NODE_1_length_1538194_cov_1083.054483_792	+	744766	745008	243		CDS
NODE_1_length_1538194_cov_1083.054483_793	+	745156	745641	486		CDS
NODE_1_length_1538194_cov_1083.054483_794	+	745638	746648	1011		CDS
NODE_1_length_1538194_cov_1083.054483_795	+	746645	747400	756	K07025	CDS	K07025	putative hydrolase of the HAD superfamily
NODE_1_length_1538194_cov_1083.054483_796	-	747366	748958	1593	TC.CIC	CDS	K03281	chloride channel protein, CIC family
NODE_1_length_1538194_cov_1083.054483_797	+	749100	749642	543		CDS
NODE_1_length_1538194_cov_1083.054483_798	+	749600	749782	183		CDS
NODE_1_length_1538194_cov_1083.054483_799	-	749797	750183	387	msrB	CDS	K07305	peptide-methionine (R)-S-oxide reductase [EC:1.8.4.12]
NODE_1_length_1538194_cov_1083.054483_800	-	750204	750932	729		CDS
NODE_1_length_1538194_cov_1083.054483_801	-	750916	752019	1104		CDS
NODE_1_length_1538194_cov_1083.054483_802	-	752043	752669	627	cobY	CDS	K19712	adenosylcobinamide-phosphate guanylyltransferase [EC:2.7.7.62]
NODE_1_length_1538194_cov_1083.054483_803	-	752666	753412	747	E2.7.8.26, cobS, cobV	CDS	K02233	adenosylcobinamide-GDP ribazoletransferase [EC:2.7.8.26]
NODE_1_length_1538194_cov_1083.054483_804	-	753421	754539	1119		CDS
NODE_1_length_1538194_cov_1083.054483_805	-	754520	755461	942	cbiB, cobD	CDS	K02227	adenosylcobinamide-phosphate synthase [EC:6.3.1.10]
NODE_1_length_1538194_cov_1083.054483_806	-	755458	756849	1392	cobD	CDS	K04720	threonine-phosphate decarboxylase [EC:4.1.1.81]
NODE_1_length_1538194_cov_1083.054483_807	-	756846	757505	660	DPH6	CDS	K06927	diphthine-ammonia ligase [EC:6.3.1.14]
NODE_1_length_1538194_cov_1083.054483_808	-	757512	758471	960	asnB, ASNS	CDS	K01953	asparagine synthase (glutamine-hydrolysing) [EC:6.3.5.4]
NODE_1_length_1538194_cov_1083.054483_809	-	758459	759271	813	ABC.FEV.A	CDS	K02013	iron complex transport system ATP-binding protein [EC:7.2.2.-]
NODE_1_length_1538194_cov_1083.054483_810	-	759261	760283	1023		CDS
NODE_1_length_1538194_cov_1083.054483_811	-	760283	761389	1107	btuF	CDS	K25034	cobalamin transport system substrate-binding protein
NODE_1_length_1538194_cov_1083.054483_812	+	761460	762662	1203	apgM	CDS	K15635	2,3-bisphosphoglycerate-independent phosphoglycerate mutase [EC:5.4.2.12]
NODE_1_length_1538194_cov_1083.054483_813	-	762693	763742	1050	ACR3, arsB	CDS	K03325	arsenite transporter
NODE_1_length_1538194_cov_1083.054483_814	+	763892	764461	570	chrR, NQR	CDS	K19784	chromate reductase, NAD(P)H dehydrogenase (quinone)
NODE_1_length_1538194_cov_1083.054483_815	-	764486	765748	1263	paaK	CDS	K01912	phenylacetate-CoA ligase [EC:6.2.1.30]
NODE_1_length_1538194_cov_1083.054483_816	-	765844	766830	987		CDS
NODE_1_length_1538194_cov_1083.054483_817	-	766869	768311	1443	TC.SSS	CDS	K03307	solute:Na+ symporter, SSS family
NODE_1_length_1538194_cov_1083.054483_818	+	768521	768715	195		CDS
NODE_1_length_1538194_cov_1083.054483_819	-	768832	769482	651		CDS
NODE_1_length_1538194_cov_1083.054483_820	-	769642	769971	330	mazF, ndoA, chpA	CDS	K07171	mRNA interferase MazF [EC:3.1.-.-]
NODE_1_length_1538194_cov_1083.054483_821	-	769949	770182	234		CDS
NODE_1_length_1538194_cov_1083.054483_822	-	770812	771195	384		CDS
NODE_1_length_1538194_cov_1083.054483_823	-	771435	771986	552	nuc	CDS	K01174	micrococcal nuclease [EC:3.1.31.1]
NODE_1_length_1538194_cov_1083.054483_824	-	772229	773101	873		CDS
NODE_1_length_1538194_cov_1083.054483_825	+	773453	774919	1467	crtD	CDS	K20611	1-hydroxy-2-isopentenylcarotenoid 3,4-desaturase [EC:1.3.99.37]
NODE_1_length_1538194_cov_1083.054483_826	+	774933	776666	1734	lyeJ	CDS	K20616	lycopene elongase/hydratase (dihydrobisanhydrobacterioruberin-forming) [EC:2.5.1.150]
NODE_1_length_1538194_cov_1083.054483_827	+	776670	777479	810	cruF	CDS	K08977	bisanhydrobacterioruberin hydratase [EC:4.2.1.161]
NODE_1_length_1538194_cov_1083.054483_828	+	777597	779303	1707		CDS
NODE_1_length_1538194_cov_1083.054483_829	-	779568	780305	738		CDS
NODE_1_length_1538194_cov_1083.054483_830	-	780335	781495	1161	aspB	CDS	K00812	aspartate aminotransferase [EC:2.6.1.1]
NODE_1_length_1538194_cov_1083.054483_831	-	781683	782576	894	dam	CDS	K06223	DNA adenine methylase [EC:2.1.1.72]
NODE_1_length_1538194_cov_1083.054483_832	+	782843	783319	477		CDS
NODE_1_length_1538194_cov_1083.054483_833	+	783321	783968	648	queC	CDS	K06920	7-cyano-7-deazaguanine synthase [EC:6.3.4.20]
NODE_1_length_1538194_cov_1083.054483_834	-	784340	786460	2121	pol	CDS	K02319	DNA polymerase, archaea type [EC:2.7.7.7]
NODE_1_length_1538194_cov_1083.054483_835	-	786480	787532	1053	RAD51	CDS	K04482	DNA repair protein RAD51
NODE_1_length_1538194_cov_1083.054483_836	-	787938	788507	570	cas4	CDS	K07464	CRISPR-associated exonuclease Cas4 [EC:3.1.12.1]
NODE_1_length_1538194_cov_1083.054483_837	-	788524	789549	1026	cas1	CDS	K15342	CRISP-associated protein Cas1
NODE_1_length_1538194_cov_1083.054483_838	-	789557	790465	909	csa1	CDS	K19085	CRISPR-associated protein Csa1
NODE_1_length_1538194_cov_1083.054483_839	+	799835	800191	357		CDS
NODE_1_length_1538194_cov_1083.054483_840	+	800206	801174	969	csa2	CDS	K19074	CRISPR-associated protein Csa2
NODE_1_length_1538194_cov_1083.054483_841	+	801208	802035	828	cas5a_b_c	CDS	K19089	CRISPR-associated protein Cas5a/b/c
NODE_1_length_1538194_cov_1083.054483_842	+	802022	803185	1164		CDS
NODE_1_length_1538194_cov_1083.054483_843	+	803202	804779	1578	cas3	CDS	K07012	CRISPR-associated endonuclease/helicase Cas3 [EC:3.1.-.- 5.6.2.4]
NODE_1_length_1538194_cov_1083.054483_844	+	804770	805471	702		CDS
NODE_1_length_1538194_cov_1083.054483_845	-	805747	805878	132		CDS
NODE_1_length_1538194_cov_1083.054483_846	-	806610	809135	2526		CDS
NODE_1_length_1538194_cov_1083.054483_847	+	809452	810039	588		CDS
NODE_1_length_1538194_cov_1083.054483_848	+	810178	810456	279	K09732	CDS	K09732	uncharacterized protein
NODE_1_length_1538194_cov_1083.054483_849	-	810524	811138	615		CDS
NODE_1_length_1538194_cov_1083.054483_850	-	811119	812258	1140	ampS, pepS, ampT	CDS	K19689	aminopeptidase [EC:3.4.11.-]
NODE_1_length_1538194_cov_1083.054483_851	-	812614	813126	513	pfpI	CDS	K05520	protease I [EC:3.5.1.124]
NODE_1_length_1538194_cov_1083.054483_852	-	813378	814712	1335		CDS
NODE_1_length_1538194_cov_1083.054483_853	+	814951	815115	165		CDS
NODE_1_length_1538194_cov_1083.054483_854	+	815217	815720	504		CDS
NODE_1_length_1538194_cov_1083.054483_855	-	815751	817289	1539	nnr	CDS	K23997	ADP-dependent NAD(P)H-hydrate dehydratase / NAD(P)H-hydrate epimerase [EC:4.2.1.136 5.1.99.6]
NODE_1_length_1538194_cov_1083.054483_856	+	817421	818605	1185	norV	CDS	K12264	anaerobic nitric oxide reductase flavorubredoxin
NODE_1_length_1538194_cov_1083.054483_857	-	818636	820300	1665	leuA, IMS	CDS	K01649	2-isopropylmalate synthase [EC:2.3.3.13]
NODE_1_length_1538194_cov_1083.054483_858	-	820381	820596	216		CDS
NODE_1_length_1538194_cov_1083.054483_859	-	820920	821303	384		CDS
NODE_1_length_1538194_cov_1083.054483_860	-	821472	823673	2202		CDS
NODE_1_length_1538194_cov_1083.054483_861	-	823680	824795	1116	ybhS	CDS	K25181	drug efflux transport system permease protein
NODE_1_length_1538194_cov_1083.054483_862	-	824788	825759	972	ybhF	CDS	K25182	drug efflux transport system ATP-binding protein
NODE_1_length_1538194_cov_1083.054483_863	+	825824	826675	852	trmB	CDS	K23356	HTH-type transcriptional regulator, sugar sensing transcriptional regulator
NODE_1_length_1538194_cov_1083.054483_864	-	826779	828044	1266		CDS
NODE_1_length_1538194_cov_1083.054483_865	+	828169	828570	402		CDS
NODE_1_length_1538194_cov_1083.054483_866	+	828736	830133	1398		CDS
NODE_1_length_1538194_cov_1083.054483_867	-	830212	830616	405		CDS
NODE_1_length_1538194_cov_1083.054483_868	-	830799	831185	387		CDS
NODE_1_length_1538194_cov_1083.054483_869	-	831190	831429	240		CDS
NODE_1_length_1538194_cov_1083.054483_870	+	831818	833179	1362	rnj	CDS	K12574	ribonuclease J [EC:3.1.-.-]
NODE_1_length_1538194_cov_1083.054483_871	-	833187	834068	882		CDS
NODE_1_length_1538194_cov_1083.054483_872	-	834058	836139	2082		CDS
NODE_1_length_1538194_cov_1083.054483_873	-	836151	836315	165		CDS
NODE_1_length_1538194_cov_1083.054483_874	-	836308	837933	1626	herA	CDS	K06915	DNA double-strand break repair helicase HerA and related ATPase
NODE_1_length_1538194_cov_1083.054483_875	-	837933	839039	1107		CDS
NODE_1_length_1538194_cov_1083.054483_876	+	839405	840334	930		CDS
NODE_1_length_1538194_cov_1083.054483_877	+	840359	841240	882	zim	CDS	K24451	modification methylase
NODE_1_length_1538194_cov_1083.054483_878	+	841532	841813	282		CDS
NODE_1_length_1538194_cov_1083.054483_879	+	841922	842095	174		CDS
NODE_1_length_1538194_cov_1083.054483_880	-	842294	842797	504		CDS
NODE_1_length_1538194_cov_1083.054483_881	+	843014	844609	1596		CDS
NODE_1_length_1538194_cov_1083.054483_882	+	844874	846115	1242		CDS
NODE_1_length_1538194_cov_1083.054483_883	+	846197	847402	1206		CDS
NODE_1_length_1538194_cov_1083.054483_884	+	847484	847876	393		CDS
NODE_1_length_1538194_cov_1083.054483_885	+	847852	849282	1431	phr, PHR1	CDS	K01669	deoxyribodipyrimidine photo-lyase [EC:4.1.99.3]
NODE_1_length_1538194_cov_1083.054483_886	+	849361	849831	471		CDS
NODE_1_length_1538194_cov_1083.054483_887	+	850552	851013	462	padR	CDS	K10947	PadR family transcriptional regulator, regulatory protein PadR
NODE_1_length_1538194_cov_1083.054483_888	+	850997	851371	375		CDS
NODE_1_length_1538194_cov_1083.054483_889	+	851469	852002	534		CDS
NODE_1_length_1538194_cov_1083.054483_890	-	852092	852601	510		CDS
NODE_1_length_1538194_cov_1083.054483_891	+	852750	853724	975		CDS
NODE_1_length_1538194_cov_1083.054483_892	-	853734	854186	453		CDS
NODE_1_length_1538194_cov_1083.054483_893	-	854246	854644	399		CDS
NODE_1_length_1538194_cov_1083.054483_894	+	854762	855037	276		CDS
NODE_1_length_1538194_cov_1083.054483_895	-	855101	855460	360		CDS
NODE_1_length_1538194_cov_1083.054483_896	-	855526	855885	360		CDS
NODE_1_length_1538194_cov_1083.054483_897	-	855889	855978	90		CDS
NODE_1_length_1538194_cov_1083.054483_898	-	855997	856866	870		CDS
NODE_1_length_1538194_cov_1083.054483_899	-	856921	857409	489		CDS
NODE_1_length_1538194_cov_1083.054483_900	-	857894	858883	990	ilvC	CDS	K00053	ketol-acid reductoisomerase [EC:1.1.1.86]
NODE_1_length_1538194_cov_1083.054483_901	-	859106	859348	243		CDS
NODE_1_length_1538194_cov_1083.054483_902	-	859439	859951	513	E2.2.1.6S, ilvH, ilvN	CDS	K01653	acetolactate synthase I/III small subunit [EC:2.2.1.6]
NODE_1_length_1538194_cov_1083.054483_903	-	859944	861647	1704	E2.2.1.6L, ilvB, ilvG, ilvI	CDS	K01652	acetolactate synthase I/II/III large subunit [EC:2.2.1.6]
NODE_1_length_1538194_cov_1083.054483_904	-	862108	862518	411		CDS
NODE_1_length_1538194_cov_1083.054483_905	+	862598	863488	891		CDS
NODE_1_length_1538194_cov_1083.054483_906	-	863366	865168	1803		CDS
NODE_1_length_1538194_cov_1083.054483_907	-	865182	865745	564	lemA	CDS	K03744	LemA protein
NODE_1_length_1538194_cov_1083.054483_908	-	865850	866182	333		CDS
NODE_1_length_1538194_cov_1083.054483_909	-	866303	867079	777	K06953	CDS	K06953	uncharacterized protein
NODE_1_length_1538194_cov_1083.054483_910	-	867117	868358	1242		CDS
NODE_1_length_1538194_cov_1083.054483_911	+	868485	868925	441		CDS
NODE_1_length_1538194_cov_1083.054483_912	+	868922	870802	1881	aor	CDS	K03738	aldehyde:ferredoxin oxidoreductase [EC:1.2.7.5]
NODE_1_length_1538194_cov_1083.054483_913	+	870945	871604	660		CDS
NODE_1_length_1538194_cov_1083.054483_914	+	871601	872968	1368	mtmB	CDS	K16176	methylamine---corrinoid protein Co-methyltransferase [EC:2.1.1.248]
NODE_1_length_1538194_cov_1083.054483_915	+	872983	874359	1377	mtmB	CDS	K16176	methylamine---corrinoid protein Co-methyltransferase [EC:2.1.1.248]
NODE_1_length_1538194_cov_1083.054483_916	-	874421	875362	942	nupC	CDS	K23536	general nucleoside transport system permease protein
NODE_1_length_1538194_cov_1083.054483_917	-	875359	876414	1056	nupB	CDS	K23535	general nucleoside transport system permease protein
NODE_1_length_1538194_cov_1083.054483_918	-	876416	877981	1566	nupA	CDS	K23537	general nucleoside transport system ATP-binding protein
NODE_1_length_1538194_cov_1083.054483_919	-	877985	878989	1005	bmpA, bmpB, tmpC	CDS	K07335	basic membrane protein A and related proteins
NODE_1_length_1538194_cov_1083.054483_920	-	879082	879828	747	tatD	CDS	K03424	TatD DNase family protein [EC:3.1.21.-]
NODE_1_length_1538194_cov_1083.054483_921	-	879942	880619	678	psmA, prcA	CDS	K03432	proteasome alpha subunit [EC:3.4.25.1]
NODE_1_length_1538194_cov_1083.054483_922	-	880623	881213	591	psmB, prcB	CDS	K03433	proteasome beta subunit [EC:3.4.25.1]
NODE_1_length_1538194_cov_1083.054483_923	-	881306	881860	555		CDS
NODE_1_length_1538194_cov_1083.054483_924	+	881987	882928	942		CDS
NODE_1_length_1538194_cov_1083.054483_925	-	882914	883267	354	K07108	CDS	K07108	uncharacterized protein
NODE_1_length_1538194_cov_1083.054483_926	-	883324	885051	1728		CDS
NODE_1_length_1538194_cov_1083.054483_927	+	885130	885567	438		CDS
NODE_1_length_1538194_cov_1083.054483_928	+	885580	886026	447		CDS
NODE_1_length_1538194_cov_1083.054483_929	-	886016	887314	1299	acdAB	CDS	K24012	acetate---CoA ligase (ADP-forming) [EC:6.2.1.13]
NODE_1_length_1538194_cov_1083.054483_930	-	887462	887917	456		CDS
NODE_1_length_1538194_cov_1083.054483_931	+	888045	888449	405		CDS
NODE_1_length_1538194_cov_1083.054483_932	+	888489	889373	885	nifB	CDS	K02585	nitrogen fixation protein NifB
NODE_1_length_1538194_cov_1083.054483_933	-	889377	890885	1509		CDS
NODE_1_length_1538194_cov_1083.054483_934	+	891044	891373	330	trxA	CDS	K03671	thioredoxin 1
NODE_1_length_1538194_cov_1083.054483_935	+	891393	892085	693	pgp	CDS	K22223	phosphoglycolate phosphatase [EC:3.1.3.18]
NODE_1_length_1538194_cov_1083.054483_936	+	892098	892769	672	TRM9	CDS	K15444	tRNA (uracil-5-)-methyltransferase TRM9 [EC:2.1.1.229]
NODE_1_length_1538194_cov_1083.054483_937	+	892766	894394	1629	ELP3, KAT9	CDS	K07739	elongator complex protein 3 (tRNA uridine(34) acetyltransferase) [EC:2.3.1.-]
NODE_1_length_1538194_cov_1083.054483_938	-	894386	895126	741	acuC	CDS	K04768	acetoin utilization protein AcuC
NODE_1_length_1538194_cov_1083.054483_939	+	895606	897132	1527	K06865	CDS	K06865	ATPase
NODE_1_length_1538194_cov_1083.054483_940	+	897144	897986	843	TRM5, TRMT5	CDS	K15429	tRNA (guanine37-N1)-methyltransferase [EC:2.1.1.228]
NODE_1_length_1538194_cov_1083.054483_941	+	897983	898804	822	larE	CDS	K06864	pyridinium-3,5-biscarboxylic acid mononucleotide sulfurtransferase [EC:4.4.1.37]
NODE_1_length_1538194_cov_1083.054483_942	-	898861	899955	1095	DHPS, dys	CDS	K00809	deoxyhypusine synthase [EC:2.5.1.46]
NODE_1_length_1538194_cov_1083.054483_943	-	900107	900436	330	hcaC	CDS	K05710	3-phenylpropionate/trans-cinnamate dioxygenase ferredoxin component
NODE_1_length_1538194_cov_1083.054483_944	+	900619	901557	939	thrB	CDS	K00872	homoserine kinase [EC:2.7.1.39]
NODE_1_length_1538194_cov_1083.054483_945	+	901550	902785	1236	thrC	CDS	K01733	threonine synthase [EC:4.2.3.1]
NODE_1_length_1538194_cov_1083.054483_946	-	902794	903738	945	K07744	CDS	K07744	transcriptional regulator
NODE_1_length_1538194_cov_1083.054483_947	+	903866	905764	1899	ACSL, fadD	CDS	K01897	long-chain acyl-CoA synthetase [EC:6.2.1.3]
NODE_1_length_1538194_cov_1083.054483_948	-	905768	906448	681	GPN	CDS	K24104	GPN-loop GTPase
NODE_1_length_1538194_cov_1083.054483_949	+	906587	907108	522		CDS
NODE_1_length_1538194_cov_1083.054483_950	-	907179	908624	1446	TC.SSS	CDS	K03307	solute:Na+ symporter, SSS family
NODE_1_length_1538194_cov_1083.054483_951	-	908617	908772	156		CDS
NODE_1_length_1538194_cov_1083.054483_952	-	908774	910072	1299	paaK	CDS	K01912	phenylacetate-CoA ligase [EC:6.2.1.30]
NODE_1_length_1538194_cov_1083.054483_953	-	910281	911324	1044	K09003	CDS	K09003	uncharacterized protein
NODE_1_length_1538194_cov_1083.054483_954	+	911689	912612	924		CDS
NODE_1_length_1538194_cov_1083.054483_955	+	912666	913013	348		CDS
NODE_1_length_1538194_cov_1083.054483_956	-	913041	914519	1479	htpX	CDS	K03799	heat shock protein HtpX [EC:3.4.24.-]
NODE_1_length_1538194_cov_1083.054483_957	+	914708	915130	423		CDS
NODE_1_length_1538194_cov_1083.054483_958	+	915329	916093	765	lysX	CDS	K05827	[lysine-biosynthesis-protein LysW]---L-2-aminoadipate ligase [EC:6.3.2.43]
NODE_1_length_1538194_cov_1083.054483_959	+	916090	917142	1053	lysY, argC	CDS	K05829	[amino group carrier protein]-6-phospho-L-2-aminoadipate/5-phospho-L-glutamate reductase [EC:1.2.1.103 1.2.1.106]
NODE_1_length_1538194_cov_1083.054483_960	+	917139	917960	822	lysZ, argB	CDS	K05828	[amino group carrier protein]-L-2-aminoadipate/L-glutamate 6-kinase [EC:2.7.2.17 2.7.2.19]
NODE_1_length_1538194_cov_1083.054483_961	+	917957	919132	1176	lysJ, argD	CDS	K05830	[amino-group carrier protein]-gamma-(L-lysyl/L-ornithyl)-L-glutamate aminotransferase [EC:2.6.1.118 2.6.1.124]
NODE_1_length_1538194_cov_1083.054483_962	+	919134	920237	1104	lysK, argE	CDS	K05831	[amino group carrier protein]-lysine/ornithine hydrolase [EC:3.5.1.130 3.5.1.132]
NODE_1_length_1538194_cov_1083.054483_963	-	920244	920621	378	HSP20	CDS	K13993	HSP20 family protein
NODE_1_length_1538194_cov_1083.054483_964	-	920635	921387	753	K06869	CDS	K06869	uncharacterized protein
NODE_1_length_1538194_cov_1083.054483_965	-	921491	922705	1215	nfeD	CDS	K07403	membrane-bound serine protease (ClpP class)
NODE_1_length_1538194_cov_1083.054483_966	-	922827	923636	810		CDS
NODE_1_length_1538194_cov_1083.054483_967	-	923695	924738	1044		CDS
NODE_1_length_1538194_cov_1083.054483_968	-	924880	926121	1242	hdrD	CDS	K08264	heterodisulfide reductase subunit D [EC:1.8.98.1]
NODE_1_length_1538194_cov_1083.054483_969	-	926135	927595	1461	glcD	CDS	K00104	glycolate dehydrogenase FAD-linked subunit [EC:1.1.99.14]
NODE_1_length_1538194_cov_1083.054483_970	+	927810	929219	1410	pycB	CDS	K01960	pyruvate carboxylase subunit B [EC:6.4.1.1]
NODE_1_length_1538194_cov_1083.054483_971	+	929413	930387	975		CDS
NODE_1_length_1538194_cov_1083.054483_972	+	930397	931083	687		CDS
NODE_1_length_1538194_cov_1083.054483_973	+	931149	932402	1254	AHCY, ahcY	CDS	K01251	adenosylhomocysteinase [EC:3.13.2.1]
NODE_1_length_1538194_cov_1083.054483_974	-	932430	932984	555	endA	CDS	K01170	tRNA-intron endonuclease, archaea type [EC:4.6.1.16]
NODE_1_length_1538194_cov_1083.054483_975	-	933193	933864	672	K07220	CDS	K07220	uncharacterized protein
NODE_1_length_1538194_cov_1083.054483_976	+	934102	935025	924	trxB, TRR	CDS	K00384	thioredoxin reductase (NADPH) [EC:1.8.1.9]
NODE_1_length_1538194_cov_1083.054483_977	-	935022	935282	261		CDS
NODE_1_length_1538194_cov_1083.054483_978	-	935329	937035	1707	GARS, glyS1	CDS	K01880	glycyl-tRNA synthetase [EC:6.1.1.14]
NODE_1_length_1538194_cov_1083.054483_979	+	937199	938089	891	speB	CDS	K01480	agmatinase [EC:3.5.3.11]
NODE_1_length_1538194_cov_1083.054483_980	-	938091	938237	147	rpoP	CDS	K03059	DNA-directed RNA polymerase subunit P [EC:2.7.7.6]
NODE_1_length_1538194_cov_1083.054483_981	+	938485	940125	1641		CDS
NODE_1_length_1538194_cov_1083.054483_982	+	940122	941378	1257		CDS
NODE_1_length_1538194_cov_1083.054483_983	+	941394	942659	1266	mvaA	CDS	K00054	hydroxymethylglutaryl-CoA reductase [EC:1.1.1.88]
NODE_1_length_1538194_cov_1083.054483_984	-	942648	942830	183	fer	CDS	K05337	ferredoxin
NODE_1_length_1538194_cov_1083.054483_985	+	942903	943469	567		CDS
NODE_1_length_1538194_cov_1083.054483_986	+	943493	943771	279		CDS
NODE_1_length_1538194_cov_1083.054483_987	-	943764	944267	504		CDS
NODE_1_length_1538194_cov_1083.054483_988	-	944245	944709	465		CDS
NODE_1_length_1538194_cov_1083.054483_989	-	944702	945361	660	mcrC	CDS	K03421	methyl-coenzyme M reductase subunit C
NODE_1_length_1538194_cov_1083.054483_990	-	945363	945692	330	mcrD	CDS	K03422	methyl-coenzyme M reductase subunit D
NODE_1_length_1538194_cov_1083.054483_991	+	945763	947298	1536		CDS
NODE_1_length_1538194_cov_1083.054483_992	+	947295	947717	423		CDS
NODE_1_length_1538194_cov_1083.054483_993	+	947704	948270	567		CDS
NODE_1_length_1538194_cov_1083.054483_994	+	948263	949165	903		CDS
NODE_1_length_1538194_cov_1083.054483_995	+	949183	950862	1680	K00400	CDS	K00400	methyl coenzyme M reductase system, component A2
NODE_1_length_1538194_cov_1083.054483_996	+	950852	952750	1899		CDS
NODE_1_length_1538194_cov_1083.054483_997	+	952737	953282	546		CDS
NODE_1_length_1538194_cov_1083.054483_998	+	953473	953976	504	K07103	CDS	K07103	uncharacterized protein
NODE_1_length_1538194_cov_1083.054483_999	-	954131	955483	1353	trpB	CDS	K06001	tryptophan synthase beta chain [EC:4.2.1.20]
NODE_1_length_1538194_cov_1083.054483_1000	+	955610	955939	330		CDS
NODE_1_length_1538194_cov_1083.054483_1001	+	955936	956376	441		CDS
NODE_1_length_1538194_cov_1083.054483_1002	+	956466	956828	363		CDS
NODE_1_length_1538194_cov_1083.054483_1003	-	956882	957565	684	TPI, tpiA	CDS	K01803	triosephosphate isomerase (TIM) [EC:5.3.1.1]
NODE_1_length_1538194_cov_1083.054483_1004	-	957618	957953	336		CDS
NODE_1_length_1538194_cov_1083.054483_1005	+	957970	958848	879	nadE	CDS	K01916	NAD+ synthase [EC:6.3.1.5]
NODE_1_length_1538194_cov_1083.054483_1006	+	958845	959366	522		CDS
NODE_1_length_1538194_cov_1083.054483_1007	-	959341	960735	1395	thiDN	CDS	K21219	hydroxymethylpyrimidine kinase / phosphomethylpyrimidine kinase / thiamine-phosphate diphosphorylase [EC:2.7.1.49 2.7.4.7 2.5.1.3]
NODE_1_length_1538194_cov_1083.054483_1008	+	960817	961779	963	thiR	CDS	K22206	XRE family transcriptional regulator, thiamine biosynthesis regulator
NODE_1_length_1538194_cov_1083.054483_1009	+	961839	962990	1152		CDS
NODE_1_length_1538194_cov_1083.054483_1010	+	963086	964327	1242		CDS
NODE_1_length_1538194_cov_1083.054483_1011	+	964351	965577	1227	ycaO	CDS	K24409	thioglycine synthase [EC:6.2.2.1]
NODE_1_length_1538194_cov_1083.054483_1012	+	965601	966251	651	tfuA	CDS	K24410	TfuA protein
NODE_1_length_1538194_cov_1083.054483_1013	+	966381	968006	1626	K00400	CDS	K00400	methyl coenzyme M reductase system, component A2
NODE_1_length_1538194_cov_1083.054483_1014	-	967977	968906	930	K07123	CDS	K07123	uncharacterized protein
NODE_1_length_1538194_cov_1083.054483_1015	+	968975	969265	291		CDS
NODE_1_length_1538194_cov_1083.054483_1016	+	969275	970063	789		CDS
NODE_1_length_1538194_cov_1083.054483_1017	-	970039	970308	270		CDS
NODE_1_length_1538194_cov_1083.054483_1018	-	970676	972346	1671	mcrA	CDS	K00399	methyl-coenzyme M reductase alpha subunit [EC:2.8.4.1]
NODE_1_length_1538194_cov_1083.054483_1019	-	972360	973136	777	mcrG	CDS	K00402	methyl-coenzyme M reductase gamma subunit [EC:2.8.4.1]
NODE_1_length_1538194_cov_1083.054483_1020	-	973138	974559	1422	mcrB	CDS	K00401	methyl-coenzyme M reductase beta subunit [EC:2.8.4.1]
NODE_1_length_1538194_cov_1083.054483_1021	-	974605	975159	555		CDS
NODE_1_length_1538194_cov_1083.054483_1022	-	975170	975928	759	ssuB	CDS	K15555	sulfonate transport system ATP-binding protein [EC:7.6.2.14]
NODE_1_length_1538194_cov_1083.054483_1023	-	975938	976693	756	ssuC	CDS	K15554	sulfonate transport system permease protein
NODE_1_length_1538194_cov_1083.054483_1024	-	976736	977704	969	ssuA	CDS	K15553	sulfonate transport system substrate-binding protein
NODE_1_length_1538194_cov_1083.054483_1025	-	977775	978272	498		CDS
NODE_1_length_1538194_cov_1083.054483_1026	+	978612	979085	474		CDS
NODE_1_length_1538194_cov_1083.054483_1027	+	979086	979604	519		CDS
NODE_1_length_1538194_cov_1083.054483_1028	-	979619	979816	198		CDS
NODE_1_length_1538194_cov_1083.054483_1029	-	979813	980244	432		CDS
NODE_1_length_1538194_cov_1083.054483_1030	+	980399	980962	564	porC, porG	CDS	K00172	pyruvate ferredoxin oxidoreductase gamma subunit [EC:1.2.7.1]
NODE_1_length_1538194_cov_1083.054483_1031	+	980959	981255	297	porD	CDS	K00171	pyruvate ferredoxin oxidoreductase delta subunit [EC:1.2.7.1]
NODE_1_length_1538194_cov_1083.054483_1032	+	981255	982421	1167	porA	CDS	K00169	pyruvate ferredoxin oxidoreductase alpha subunit [EC:1.2.7.1]
NODE_1_length_1538194_cov_1083.054483_1033	+	982418	983344	927	porB	CDS	K00170	pyruvate ferredoxin oxidoreductase beta subunit [EC:1.2.7.1]
NODE_1_length_1538194_cov_1083.054483_1034	+	983341	983928	588	SEC11, sipW	CDS	K13280	signal peptidase I [EC:3.4.21.89]
NODE_1_length_1538194_cov_1083.054483_1035	+	983998	984549	552	TBP, tbp	CDS	K03120	transcription initiation factor TFIID TATA-box-binding protein
NODE_1_length_1538194_cov_1083.054483_1036	-	984650	985027	378		CDS
NODE_1_length_1538194_cov_1083.054483_1037	+	985242	986798	1557	leuA, IMS	CDS	K01649	2-isopropylmalate synthase [EC:2.3.3.13]
NODE_1_length_1538194_cov_1083.054483_1038	-	986851	989010	2160	VCP, CDC48	CDS	K13525	transitional endoplasmic reticulum ATPase
NODE_1_length_1538194_cov_1083.054483_1039	+	989093	989536	444	HSP20	CDS	K13993	HSP20 family protein
NODE_1_length_1538194_cov_1083.054483_1040	+	989742	990038	297	gatC, GATC	CDS	K02435	aspartyl-tRNA(Asn)/glutamyl-tRNA(Gln) amidotransferase subunit C [EC:6.3.5.6 6.3.5.7]
NODE_1_length_1538194_cov_1083.054483_1041	+	990057	991496	1440	gatA, QRSL1	CDS	K02433	aspartyl-tRNA(Asn)/glutamyl-tRNA(Gln) amidotransferase subunit A [EC:6.3.5.6 6.3.5.7]
NODE_1_length_1538194_cov_1083.054483_1042	+	991518	992987	1470	gatB, PET112	CDS	K02434	aspartyl-tRNA(Asn)/glutamyl-tRNA(Gln) amidotransferase subunit B [EC:6.3.5.6 6.3.5.7]
NODE_1_length_1538194_cov_1083.054483_1043	-	993027	996128	3102		CDS
NODE_1_length_1538194_cov_1083.054483_1044	-	996168	996773	606	iorB	CDS	K00180	indolepyruvate ferredoxin oxidoreductase, beta subunit [EC:1.2.7.8]
NODE_1_length_1538194_cov_1083.054483_1045	-	996781	998718	1938	iorA	CDS	K00179	indolepyruvate ferredoxin oxidoreductase, alpha subunit [EC:1.2.7.8]
NODE_1_length_1538194_cov_1083.054483_1046	+	998905	999573	669	acdB	CDS	K22224	acetate---CoA ligase (ADP-forming) subunit beta [EC:6.2.1.13]
NODE_1_length_1538194_cov_1083.054483_1047	+	999661	1000524	864	rbsK, RBKS	CDS	K00852	ribokinase [EC:2.7.1.15]
NODE_1_length_1538194_cov_1083.054483_1048	-	1000698	1002944	2247		CDS
NODE_1_length_1538194_cov_1083.054483_1049	-	1003081	1003653	573		CDS
NODE_1_length_1538194_cov_1083.054483_1050	-	1003640	1004302	663		CDS
NODE_1_length_1538194_cov_1083.054483_1051	-	1004463	1005233	771	ABC.FEV.A	CDS	K02013	iron complex transport system ATP-binding protein [EC:7.2.2.-]
NODE_1_length_1538194_cov_1083.054483_1052	-	1005224	1006243	1020	ABC.FEV.P	CDS	K02015	iron complex transport system permease protein
NODE_1_length_1538194_cov_1083.054483_1053	-	1006289	1007335	1047		CDS
NODE_1_length_1538194_cov_1083.054483_1054	-	1007386	1008786	1401		CDS
NODE_1_length_1538194_cov_1083.054483_1055	-	1008849	1009271	423		CDS
NODE_1_length_1538194_cov_1083.054483_1056	-	1009276	1010298	1023	gap2, gapB	CDS	K00150	glyceraldehyde-3-phosphate dehydrogenase (NAD(P)+) (phosphorylating) [EC:1.2.1.59]
NODE_1_length_1538194_cov_1083.054483_1057	-	1010314	1011561	1248	PGK, pgk	CDS	K00927	phosphoglycerate kinase [EC:2.7.2.3]
NODE_1_length_1538194_cov_1083.054483_1058	-	1011631	1012392	762	pgi1	CDS	K06859	glucose-6-phosphate isomerase, archaeal [EC:5.3.1.9]
NODE_1_length_1538194_cov_1083.054483_1059	-	1012568	1012819	252		CDS
NODE_1_length_1538194_cov_1083.054483_1060	-	1012988	1014778	1791	LIG1	CDS	K10747	DNA ligase 1 [EC:6.5.1.1 6.5.1.6 6.5.1.7]
NODE_1_length_1538194_cov_1083.054483_1061	+	1014876	1015541	666	ppaX	CDS	K06019	pyrophosphatase PpaX [EC:3.6.1.1]
NODE_1_length_1538194_cov_1083.054483_1062	-	1015552	1016259	708		CDS
NODE_1_length_1538194_cov_1083.054483_1063	-	1016333	1016863	531		CDS
NODE_1_length_1538194_cov_1083.054483_1064	-	1016981	1018141	1161		CDS
NODE_1_length_1538194_cov_1083.054483_1065	+	1018257	1018484	228		CDS
NODE_1_length_1538194_cov_1083.054483_1066	-	1018598	1019791	1194		CDS
NODE_1_length_1538194_cov_1083.054483_1067	-	1019803	1020411	609	K09141	CDS	K09141	uncharacterized protein
NODE_1_length_1538194_cov_1083.054483_1068	-	1020417	1020848	432	K09122	CDS	K09122	uncharacterized protein
NODE_1_length_1538194_cov_1083.054483_1069	-	1020851	1021654	804		CDS
NODE_1_length_1538194_cov_1083.054483_1070	-	1021651	1022496	846		CDS
NODE_1_length_1538194_cov_1083.054483_1071	-	1022591	1023145	555		CDS
NODE_1_length_1538194_cov_1083.054483_1072	-	1023231	1025156	1926		CDS
NODE_1_length_1538194_cov_1083.054483_1073	+	1025216	1025473	258		CDS
NODE_1_length_1538194_cov_1083.054483_1074	-	1025442	1025933	492		CDS
NODE_1_length_1538194_cov_1083.054483_1075	+	1025990	1026832	843	E4.2.1.2AA, fumA	CDS	K01677	fumarate hydratase subunit alpha [EC:4.2.1.2]
NODE_1_length_1538194_cov_1083.054483_1076	+	1026837	1027391	555	E4.2.1.2AB, fumB	CDS	K01678	fumarate hydratase subunit beta [EC:4.2.1.2]
NODE_1_length_1538194_cov_1083.054483_1077	-	1027515	1030010	2496	aor	CDS	K03738	aldehyde:ferredoxin oxidoreductase [EC:1.2.7.5]
NODE_1_length_1538194_cov_1083.054483_1078	+	1030127	1030405	279	moaD, cysO	CDS	K03636	sulfur-carrier protein
NODE_1_length_1538194_cov_1083.054483_1079	-	1030402	1031532	1131		CDS
NODE_1_length_1538194_cov_1083.054483_1080	+	1031836	1032357	522		CDS
NODE_1_length_1538194_cov_1083.054483_1081	+	1032435	1032671	237	RUXX	CDS	K04796	small nuclear ribonucleoprotein
NODE_1_length_1538194_cov_1083.054483_1082	+	1032717	1033220	504		CDS
NODE_1_length_1538194_cov_1083.054483_1083	+	1033361	1034578	1218	metK, MAT	CDS	K00789	S-adenosylmethionine synthetase [EC:2.5.1.6]
NODE_1_length_1538194_cov_1083.054483_1084	-	1034538	1036526	1989	K09150	CDS	K09150	uncharacterized protein
NODE_1_length_1538194_cov_1083.054483_1085	+	1036707	1037012	306		CDS
NODE_1_length_1538194_cov_1083.054483_1086	-	1037130	1038761	1632	pyrG, CTPS	CDS	K01937	CTP synthase [EC:6.3.4.2]
NODE_1_length_1538194_cov_1083.054483_1087	-	1038807	1039493	687	DPH6	CDS	K06927	diphthine-ammonia ligase [EC:6.3.1.14]
NODE_1_length_1538194_cov_1083.054483_1088	-	1039504	1040199	696		CDS
NODE_1_length_1538194_cov_1083.054483_1089	+	1040261	1041079	819		CDS
NODE_1_length_1538194_cov_1083.054483_1090	+	1041135	1041887	753	sufC	CDS	K09013	Fe-S cluster assembly ATP-binding protein
NODE_1_length_1538194_cov_1083.054483_1091	+	1041884	1043116	1233	K07033	CDS	K07033	uncharacterized protein
NODE_1_length_1538194_cov_1083.054483_1092	-	1043197	1044153	957	birA	CDS	K03524	BirA family transcriptional regulator, biotin operon repressor / biotin---[acetyl-CoA-carboxylase] ligase [EC:6.3.4.15]
NODE_1_length_1538194_cov_1083.054483_1093	-	1044185	1045384	1200	uctC	CDS	K18702	CoA:oxalate CoA-transferase [EC:2.8.3.19]
NODE_1_length_1538194_cov_1083.054483_1094	-	1045568	1047142	1575	mmdA	CDS	K01604	methylmalonyl-CoA decarboxylase subunit alpha [EC:7.2.4.3]
NODE_1_length_1538194_cov_1083.054483_1095	-	1047159	1047569	411		CDS
NODE_1_length_1538194_cov_1083.054483_1096	-	1047588	1049174	1587	pycA	CDS	K01959	pyruvate carboxylase subunit A [EC:6.4.1.1]
NODE_1_length_1538194_cov_1083.054483_1097	-	1049380	1050057	678	hypB	CDS	K04652	hydrogenase nickel incorporation protein HypB
NODE_1_length_1538194_cov_1083.054483_1098	-	1050363	1050830	468	asnC	CDS	K03718	Lrp/AsnC family transcriptional regulator, regulator for asnA, asnC and gidA
NODE_1_length_1538194_cov_1083.054483_1099	-	1050963	1051730	768		CDS
NODE_1_length_1538194_cov_1083.054483_1100	+	1051954	1052964	1011	purA, ADSS	CDS	K01939	adenylosuccinate synthase [EC:6.3.4.4]
NODE_1_length_1538194_cov_1083.054483_1101	-	1053033	1053554	522		CDS
NODE_1_length_1538194_cov_1083.054483_1102	-	1053574	1055376	1803	glmS, GFPT	CDS	K00820	glutamine---fructose-6-phosphate transaminase (isomerizing) [EC:2.6.1.16]
NODE_1_length_1538194_cov_1083.054483_1103	-	1055487	1057442	1956	gatE	CDS	K03330	glutamyl-tRNA(Gln) amidotransferase subunit E [EC:6.3.5.7]
NODE_1_length_1538194_cov_1083.054483_1104	-	1057432	1058907	1476	gatD	CDS	K09482	glutamyl-tRNA(Gln) amidotransferase subunit D [EC:6.3.5.7]
NODE_1_length_1538194_cov_1083.054483_1105	+	1059071	1059358	288	RP-S26e, RPS26	CDS	K02976	small subunit ribosomal protein S26e
NODE_1_length_1538194_cov_1083.054483_1106	+	1059372	1059941	570	trmY	CDS	K16317	tRNA (pseudouridine54-N1)-methyltransferase [EC:2.1.1.257]
NODE_1_length_1538194_cov_1083.054483_1107	+	1060006	1060350	345	padR	CDS	K10947	PadR family transcriptional regulator, regulatory protein PadR
NODE_1_length_1538194_cov_1083.054483_1108	-	1060482	1061045	564	E2.7.8.39	CDS	K17884	archaetidylinositol phosphate synthase [EC:2.7.8.39]
NODE_1_length_1538194_cov_1083.054483_1109	+	1061112	1062296	1185	guaA, GMPS	CDS	K01951	GMP synthase (glutamine-hydrolysing) [EC:6.3.5.2]
NODE_1_length_1538194_cov_1083.054483_1110	+	1062425	1063081	657	guaA, GMPS	CDS	K01951	GMP synthase (glutamine-hydrolysing) [EC:6.3.5.2]
NODE_1_length_1538194_cov_1083.054483_1111	-	1063731	1065137	1407		CDS
NODE_1_length_1538194_cov_1083.054483_1112	+	1065347	1065778	432		CDS
NODE_1_length_1538194_cov_1083.054483_1113	+	1065802	1066602	801		CDS
NODE_1_length_1538194_cov_1083.054483_1114	-	1066919	1067353	435		CDS
NODE_1_length_1538194_cov_1083.054483_1115	+	1067477	1067959	483		CDS
NODE_1_length_1538194_cov_1083.054483_1116	-	1068027	1068914	888	flaK	CDS	K07991	archaeal preflagellin peptidase FlaK [EC:3.4.23.52]
NODE_1_length_1538194_cov_1083.054483_1117	+	1069044	1070528	1485	flaI	CDS	K07332	archaeal flagellar protein FlaI
NODE_1_length_1538194_cov_1083.054483_1118	+	1070525	1071511	987	flaJ	CDS	K07333	archaeal flagellar protein FlaJ
NODE_1_length_1538194_cov_1083.054483_1119	+	1071516	1072346	831	flaJ	CDS	K07333	archaeal flagellar protein FlaJ
NODE_1_length_1538194_cov_1083.054483_1120	-	1072590	1073762	1173		CDS
NODE_1_length_1538194_cov_1083.054483_1121	-	1074035	1074466	432		CDS
NODE_1_length_1538194_cov_1083.054483_1122	-	1074477	1074785	309		CDS
NODE_1_length_1538194_cov_1083.054483_1123	-	1074844	1076730	1887	TARS, thrS	CDS	K01868	threonyl-tRNA synthetase [EC:6.1.1.3]
NODE_1_length_1538194_cov_1083.054483_1124	-	1077011	1077340	330		CDS
NODE_1_length_1538194_cov_1083.054483_1125	+	1077643	1077786	144		CDS
NODE_1_length_1538194_cov_1083.054483_1126	-	1077824	1080487	2664	pol	CDS	K02319	DNA polymerase, archaea type [EC:2.7.7.7]
NODE_1_length_1538194_cov_1083.054483_1127	-	1080772	1080987	216		CDS
NODE_1_length_1538194_cov_1083.054483_1128	+	1081505	1082092	588		CDS
NODE_1_length_1538194_cov_1083.054483_1129	-	1082197	1083804	1608		CDS
NODE_1_length_1538194_cov_1083.054483_1130	+	1084014	1085963	1950	RARS, argS	CDS	K01887	arginyl-tRNA synthetase [EC:6.1.1.19]
NODE_1_length_1538194_cov_1083.054483_1131	+	1086110	1086973	864		CDS
NODE_1_length_1538194_cov_1083.054483_1132	+	1086966	1088180	1215	treT	CDS	K13057	trehalose synthase [EC:2.4.1.245]
NODE_1_length_1538194_cov_1083.054483_1133	+	1088316	1088663	348		CDS
NODE_1_length_1538194_cov_1083.054483_1134	+	1088663	1090432	1770	aor	CDS	K03738	aldehyde:ferredoxin oxidoreductase [EC:1.2.7.5]
NODE_1_length_1538194_cov_1083.054483_1135	+	1090506	1091348	843	fbaB	CDS	K11645	fructose-bisphosphate aldolase, class I [EC:4.1.2.13]
NODE_1_length_1538194_cov_1083.054483_1136	+	1091370	1092269	900	rbsK, RBKS	CDS	K00852	ribokinase [EC:2.7.1.15]
NODE_1_length_1538194_cov_1083.054483_1137	+	1092372	1092890	519		CDS
NODE_1_length_1538194_cov_1083.054483_1138	-	1093216	1093446	231		CDS
NODE_1_length_1538194_cov_1083.054483_1139	-	1093461	1094321	861	htpX	CDS	K03799	heat shock protein HtpX [EC:3.4.24.-]
NODE_1_length_1538194_cov_1083.054483_1140	-	1094379	1096184	1806	ABCE1, Rli1	CDS	K06174	ATP-binding cassette, sub-family E, member 1
NODE_1_length_1538194_cov_1083.054483_1141	-	1096209	1096481	273		CDS
NODE_1_length_1538194_cov_1083.054483_1142	+	1096496	1097926	1431	tsaC, rimN, SUA5, YRDC	CDS	K07566	L-threonylcarbamoyladenylate synthase [EC:2.7.7.87]
NODE_1_length_1538194_cov_1083.054483_1143	-	1097932	1098489	558	cgi121	CDS	K09119	KEOPS complex subunit Cgi121
NODE_1_length_1538194_cov_1083.054483_1144	-	1098491	1099078	588	K07101	CDS	K07101	uncharacterized protein
NODE_1_length_1538194_cov_1083.054483_1145	-	1099088	1099369	282	moaD, cysO	CDS	K03636	sulfur-carrier protein
NODE_1_length_1538194_cov_1083.054483_1146	-	1099382	1100206	825		CDS
NODE_1_length_1538194_cov_1083.054483_1147	-	1100431	1100856	426		CDS
NODE_1_length_1538194_cov_1083.054483_1148	+	1100997	1101218	222	hmf, hmt	CDS	K24450	DNA-binding protein
NODE_1_length_1538194_cov_1083.054483_1149	+	1101338	1102978	1641	cct, ths	CDS	K22447	archaeal chaperonin
NODE_1_length_1538194_cov_1083.054483_1150	+	1103128	1103700	573	AK6, FAP7	CDS	K18532	adenylate kinase [EC:2.7.4.3]
NODE_1_length_1538194_cov_1083.054483_1151	-	1103645	1105387	1743		CDS
NODE_1_length_1538194_cov_1083.054483_1152	-	1105463	1105681	219		CDS
NODE_1_length_1538194_cov_1083.054483_1153	-	1105708	1106499	792		CDS
NODE_1_length_1538194_cov_1083.054483_1154	-	1106496	1107293	798		CDS
NODE_1_length_1538194_cov_1083.054483_1155	-	1107300	1109012	1713	flaI	CDS	K07332	archaeal flagellar protein FlaI
NODE_1_length_1538194_cov_1083.054483_1156	-	1108993	1109136	144		CDS
NODE_1_length_1538194_cov_1083.054483_1157	+	1109239	1109457	219		CDS
NODE_1_length_1538194_cov_1083.054483_1158	+	1109450	1109653	204		CDS
NODE_1_length_1538194_cov_1083.054483_1159	+	1109643	1109972	330		CDS
NODE_1_length_1538194_cov_1083.054483_1160	+	1110044	1110436	393		CDS
NODE_1_length_1538194_cov_1083.054483_1161	-	1110485	1111420	936	TFIIB, GTF2B, SUA7, tfb	CDS	K03124	transcription initiation factor TFIIB
NODE_1_length_1538194_cov_1083.054483_1162	+	1111736	1112161	426		CDS
NODE_1_length_1538194_cov_1083.054483_1163	+	1112171	1113712	1542	tgtA	CDS	K18779	7-cyano-7-deazaguanine tRNA-ribosyltransferase [EC:2.4.2.48]
NODE_1_length_1538194_cov_1083.054483_1164	+	1113768	1114295	528		CDS
NODE_1_length_1538194_cov_1083.054483_1165	-	1114326	1115039	714	K06869	CDS	K06869	uncharacterized protein
NODE_1_length_1538194_cov_1083.054483_1166	+	1115156	1116445	1290	K07577	CDS	K07577	putative mRNA 3-end processing factor
NODE_1_length_1538194_cov_1083.054483_1167	+	1116536	1117789	1254	glyA, SHMT	CDS	K00600	glycine hydroxymethyltransferase [EC:2.1.2.1]
NODE_1_length_1538194_cov_1083.054483_1168	-	1117825	1118595	771		CDS
NODE_1_length_1538194_cov_1083.054483_1169	-	1118870	1119910	1041	pflA, pflC, pflE	CDS	K04069	pyruvate formate lyase activating enzyme [EC:1.97.1.4]
NODE_1_length_1538194_cov_1083.054483_1170	+	1120111	1120911	801		CDS
NODE_1_length_1538194_cov_1083.054483_1171	+	1120925	1123768	2844		CDS
NODE_1_length_1538194_cov_1083.054483_1172	+	1123818	1124549	732		CDS
NODE_1_length_1538194_cov_1083.054483_1173	+	1124555	1124971	417		CDS
NODE_1_length_1538194_cov_1083.054483_1174	+	1125012	1125440	429		CDS
NODE_1_length_1538194_cov_1083.054483_1175	+	1125421	1125909	489		CDS
NODE_1_length_1538194_cov_1083.054483_1176	+	1126116	1126604	489		CDS
NODE_1_length_1538194_cov_1083.054483_1177	+	1126601	1127584	984		CDS
NODE_1_length_1538194_cov_1083.054483_1178	+	1127601	1130165	2565		CDS
NODE_1_length_1538194_cov_1083.054483_1179	-	1130361	1131440	1080	K08975	CDS	K08975	putative membrane protein
NODE_1_length_1538194_cov_1083.054483_1180	-	1131635	1132513	879		CDS
NODE_1_length_1538194_cov_1083.054483_1181	-	1132533	1133288	756	GPN	CDS	K24104	GPN-loop GTPase
NODE_1_length_1538194_cov_1083.054483_1182	-	1133285	1134073	789		CDS
NODE_1_length_1538194_cov_1083.054483_1183	-	1134103	1134303	201		CDS
NODE_1_length_1538194_cov_1083.054483_1184	-	1134397	1135050	654	pflX	CDS	K04070	putative pyruvate formate lyase activating enzyme [EC:1.97.1.4]
NODE_1_length_1538194_cov_1083.054483_1185	-	1135047	1135514	468		CDS
NODE_1_length_1538194_cov_1083.054483_1186	-	1135534	1136535	1002	pflA, pflC, pflE	CDS	K04069	pyruvate formate lyase activating enzyme [EC:1.97.1.4]
NODE_1_length_1538194_cov_1083.054483_1187	+	1136603	1137466	864	PRPS, prsA	CDS	K00948	ribose-phosphate pyrophosphokinase [EC:2.7.6.1]
NODE_1_length_1538194_cov_1083.054483_1188	+	1137468	1138496	1029	trm-G10	CDS	K07446	tRNA (guanine10-N2)-dimethyltransferase [EC:2.1.1.213]
NODE_1_length_1538194_cov_1083.054483_1189	+	1138564	1139403	840	rnz	CDS	K00784	ribonuclease Z [EC:3.1.26.11]
NODE_1_length_1538194_cov_1083.054483_1190	-	1139385	1140155	771		CDS
NODE_1_length_1538194_cov_1083.054483_1191	-	1140101	1140568	468	K09736	CDS	K09736	uncharacterized protein
NODE_1_length_1538194_cov_1083.054483_1192	-	1140549	1141097	549		CDS
NODE_1_length_1538194_cov_1083.054483_1193	+	1141160	1141717	558	thpR	CDS	K01975	RNA 2',3'-cyclic 3'-phosphodiesterase [EC:3.1.4.58]
NODE_1_length_1538194_cov_1083.054483_1194	+	1141710	1143113	1404	K07558, cca	CDS	K07558	tRNA nucleotidyltransferase (CCA-adding enzyme) [EC:2.7.7.72]
NODE_1_length_1538194_cov_1083.054483_1195	+	1143101	1143847	747	K07176	CDS	K07176	putative serine/threonine protein kinase
NODE_1_length_1538194_cov_1083.054483_1196	+	1144417	1144743	327		CDS
NODE_1_length_1538194_cov_1083.054483_1197	+	1144816	1144965	150		CDS
NODE_1_length_1538194_cov_1083.054483_1198	-	1145250	1146128	879		CDS
NODE_1_length_1538194_cov_1083.054483_1199	-	1146197	1146430	234		CDS
NODE_1_length_1538194_cov_1083.054483_1200	-	1147747	1148013	267		CDS
NODE_1_length_1538194_cov_1083.054483_1201	+	1148201	1149172	972		CDS
NODE_1_length_1538194_cov_1083.054483_1202	+	1149181	1150056	876	ABC-2.P	CDS	K01992	ABC-2 type transport system permease protein
NODE_1_length_1538194_cov_1083.054483_1203	+	1150512	1150691	180		CDS
NODE_1_length_1538194_cov_1083.054483_1204	+	1150950	1151246	297		CDS
NODE_1_length_1538194_cov_1083.054483_1205	-	1151525	1152496	972		CDS
NODE_1_length_1538194_cov_1083.054483_1206	-	1152666	1153937	1272	ENO, eno	CDS	K01689	enolase [EC:4.2.1.11]
NODE_1_length_1538194_cov_1083.054483_1207	-	1153944	1155134	1191	pncB, NAPRT1	CDS	K00763	nicotinate phosphoribosyltransferase [EC:6.3.4.21]
NODE_1_length_1538194_cov_1083.054483_1208	-	1155189	1157186	1998	helS	CDS	K03726	ATP-dependent DNA helicase [EC:5.6.2.4]
NODE_1_length_1538194_cov_1083.054483_1209	-	1157419	1159494	2076	mcm	CDS	K10726	replicative DNA helicase Mcm [EC:5.6.2.3]
NODE_1_length_1538194_cov_1083.054483_1210	-	1159494	1160057	564	ginS	CDS	K09723	DNA replication factor GINS
NODE_1_length_1538194_cov_1083.054483_1211	-	1160172	1160894	723		CDS
NODE_1_length_1538194_cov_1083.054483_1212	+	1161175	1162140	966	rfcS	CDS	K04801	replication factor C small subunit
NODE_1_length_1538194_cov_1083.054483_1213	+	1162167	1163354	1188	rfcL	CDS	K04800	replication factor C large subunit
NODE_1_length_1538194_cov_1083.054483_1214	-	1163345	1164763	1419	moaA, CNX2	CDS	K03639	GTP 3',8-cyclase [EC:4.1.99.22]
NODE_1_length_1538194_cov_1083.054483_1215	-	1164760	1165284	525	moaB	CDS	K03638	molybdopterin adenylyltransferase [EC:2.7.7.75]
NODE_1_length_1538194_cov_1083.054483_1216	-	1165271	1165729	459	moaC, CNX3	CDS	K03637	cyclic pyranopterin monophosphate synthase [EC:4.6.1.17]
NODE_1_length_1538194_cov_1083.054483_1217	-	1165726	1166004	279		CDS
NODE_1_length_1538194_cov_1083.054483_1218	-	1166001	1167194	1194	cdc6A	CDS	K10725	archaeal cell division control protein 6
NODE_1_length_1538194_cov_1083.054483_1219	-	1167284	1168291	1008	hypE	CDS	K04655	hydrogenase expression/formation protein HypE
NODE_1_length_1538194_cov_1083.054483_1220	-	1168288	1168797	510		CDS
NODE_1_length_1538194_cov_1083.054483_1221	-	1168825	1169763	939	corA	CDS	K03284	magnesium transporter
NODE_1_length_1538194_cov_1083.054483_1222	+	1169901	1170995	1095	K07138	CDS	K07138	uncharacterized protein
NODE_1_length_1538194_cov_1083.054483_1223	+	1171258	1171803	546	porC, porG	CDS	K00172	pyruvate ferredoxin oxidoreductase gamma subunit [EC:1.2.7.1]
NODE_1_length_1538194_cov_1083.054483_1224	+	1171797	1172048	252	porD	CDS	K00171	pyruvate ferredoxin oxidoreductase delta subunit [EC:1.2.7.1]
NODE_1_length_1538194_cov_1083.054483_1225	+	1172054	1173223	1170	porA	CDS	K00169	pyruvate ferredoxin oxidoreductase alpha subunit [EC:1.2.7.1]
NODE_1_length_1538194_cov_1083.054483_1226	+	1173220	1174104	885	porB	CDS	K00170	pyruvate ferredoxin oxidoreductase beta subunit [EC:1.2.7.1]
NODE_1_length_1538194_cov_1083.054483_1227	-	1174101	1175102	1002		CDS
NODE_1_length_1538194_cov_1083.054483_1228	-	1175195	1177075	1881	cooS, acsA	CDS	K00198	anaerobic carbon-monoxide dehydrogenase catalytic subunit [EC:1.2.7.4]
NODE_1_length_1538194_cov_1083.054483_1229	-	1177623	1179125	1503		CDS
NODE_1_length_1538194_cov_1083.054483_1230	+	1179250	1180893	1644		CDS
NODE_1_length_1538194_cov_1083.054483_1231	+	1180966	1182012	1047		CDS
NODE_1_length_1538194_cov_1083.054483_1232	+	1182581	1183975	1395		CDS
NODE_1_length_1538194_cov_1083.054483_1233	+	1184094	1184339	246		CDS
NODE_1_length_1538194_cov_1083.054483_1234	-	1185826	1186086	261		CDS
NODE_1_length_1538194_cov_1083.054483_1235	-	1186313	1186456	144	RP-L37e, RPL37	CDS	K02922	large subunit ribosomal protein L37e
NODE_1_length_1538194_cov_1083.054483_1236	-	1186462	1186692	231	RUXX	CDS	K04796	small nuclear ribonucleoprotein
NODE_1_length_1538194_cov_1083.054483_1237	+	1186774	1187271	498		CDS
NODE_1_length_1538194_cov_1083.054483_1238	-	1187311	1189233	1923	K07041	CDS	K07041	uncharacterized protein
NODE_1_length_1538194_cov_1083.054483_1239	-	1189266	1189916	651	psmB, prcB	CDS	K03433	proteasome beta subunit [EC:3.4.25.1]
NODE_1_length_1538194_cov_1083.054483_1240	+	1190058	1191155	1098	araM, egsA	CDS	K00096	glycerol-1-phosphate dehydrogenase [NAD(P)+] [EC:1.1.1.261]
NODE_1_length_1538194_cov_1083.054483_1241	+	1191155	1191631	477	K09730	CDS	K09730	uncharacterized protein
NODE_1_length_1538194_cov_1083.054483_1242	-	1191642	1192436	795		CDS
NODE_1_length_1538194_cov_1083.054483_1243	+	1192542	1193093	552	cyaB	CDS	K05873	adenylate cyclase, class 2 [EC:4.6.1.1]
NODE_1_length_1538194_cov_1083.054483_1244	-	1193042	1193674	633	K06950	CDS	K06950	uncharacterized protein
NODE_1_length_1538194_cov_1083.054483_1245	-	1193637	1194308	672	K07096	CDS	K07096	uncharacterized protein
NODE_1_length_1538194_cov_1083.054483_1246	+	1194433	1194666	234	hypC	CDS	K04653	hydrogenase expression/formation protein HypC
NODE_1_length_1538194_cov_1083.054483_1247	+	1194682	1195776	1095	hypD	CDS	K04654	hydrogenase expression/formation protein HypD
NODE_1_length_1538194_cov_1083.054483_1248	-	1195757	1196908	1152		CDS
NODE_1_length_1538194_cov_1083.054483_1249	+	1196975	1197739	765	E3.13.2.3	CDS	K22205	S-adenosyl-L-methionine hydrolase (adenosine-forming) [EC:3.13.2.3]
NODE_1_length_1538194_cov_1083.054483_1250	+	1197856	1198404	549	nadM	CDS	K00952	nicotinamide-nucleotide adenylyltransferase [EC:2.7.7.1]
NODE_1_length_1538194_cov_1083.054483_1251	-	1198370	1198903	534	ogt, MGMT	CDS	K00567	methylated-DNA-[protein]-cysteine S-methyltransferase [EC:2.1.1.63]
NODE_1_length_1538194_cov_1083.054483_1252	+	1198986	1200041	1056	RTCA, rtcA	CDS	K01974	RNA 3'-terminal phosphate cyclase (ATP) [EC:6.5.1.4]
NODE_1_length_1538194_cov_1083.054483_1253	-	1200112	1201143	1032	NOG1	CDS	K06943	nucleolar GTP-binding protein
NODE_1_length_1538194_cov_1083.054483_1254	-	1201140	1201394	255	K09715	CDS	K09715	uncharacterized protein
NODE_1_length_1538194_cov_1083.054483_1255	+	1201463	1202077	615	psmB, prcB	CDS	K03433	proteasome beta subunit [EC:3.4.25.1]
NODE_1_length_1538194_cov_1083.054483_1256	+	1202074	1203048	975	TYW1	CDS	K15449	tRNA wybutosine-synthesizing protein 1 [EC:4.1.3.44]
NODE_1_length_1538194_cov_1083.054483_1257	+	1203063	1203731	669	K07477	CDS	K07477	translin
NODE_1_length_1538194_cov_1083.054483_1258	+	1203728	1205308	1581	sepRS	CDS	K07587	O-phosphoseryl-tRNA synthetase [EC:6.1.1.27]
NODE_1_length_1538194_cov_1083.054483_1259	+	1205417	1206004	588	E3.1.21.7, nfi	CDS	K05982	deoxyribonuclease V [EC:3.1.21.7]
NODE_1_length_1538194_cov_1083.054483_1260	+	1205994	1206680	687	rfk	CDS	K07732	riboflavin kinase, archaea type [EC:2.7.1.161]
NODE_1_length_1538194_cov_1083.054483_1261	-	1206683	1206964	282		CDS
NODE_1_length_1538194_cov_1083.054483_1262	-	1207155	1207445	291	K09728	CDS	K09728	uncharacterized protein
NODE_1_length_1538194_cov_1083.054483_1263	-	1207442	1208233	792	dph5	CDS	K20215	diphthine synthase [EC:2.1.1.98]
NODE_1_length_1538194_cov_1083.054483_1264	-	1208616	1209278	663	ABC.CD.A	CDS	K02003	putative ABC transport system ATP-binding protein
NODE_1_length_1538194_cov_1083.054483_1265	-	1209275	1210474	1200	lolC_E	CDS	K09808	lipoprotein-releasing system permease protein
NODE_1_length_1538194_cov_1083.054483_1266	-	1210471	1210794	324		CDS
NODE_1_length_1538194_cov_1083.054483_1267	-	1210795	1211229	435		CDS
NODE_1_length_1538194_cov_1083.054483_1268	+	1211418	1212209	792		CDS
NODE_1_length_1538194_cov_1083.054483_1269	+	1212221	1212625	405		CDS
NODE_1_length_1538194_cov_1083.054483_1270	+	1212655	1212984	330	K06933	CDS	K06933	uncharacterized protein
NODE_1_length_1538194_cov_1083.054483_1271	-	1213070	1213837	768	bacA	CDS	K06153	undecaprenyl-diphosphatase [EC:3.6.1.27]
NODE_1_length_1538194_cov_1083.054483_1272	-	1213850	1214305	456		CDS
NODE_1_length_1538194_cov_1083.054483_1273	-	1214345	1216048	1704		CDS
NODE_1_length_1538194_cov_1083.054483_1274	-	1216064	1217071	1008	thiL	CDS	K00946	thiamine-monophosphate kinase [EC:2.7.4.16]
NODE_1_length_1538194_cov_1083.054483_1275	-	1217911	1218369	459	msrA	CDS	K07304	peptide-methionine (S)-S-oxide reductase [EC:1.8.4.11]
NODE_1_length_1538194_cov_1083.054483_1276	+	1218583	1218822	240	mscL	CDS	K03282	large conductance mechanosensitive channel
NODE_1_length_1538194_cov_1083.054483_1277	+	1218968	1219636	669	rpiA	CDS	K01807	ribose 5-phosphate isomerase A [EC:5.3.1.6]
NODE_1_length_1538194_cov_1083.054483_1278	-	1220027	1220239	213		CDS
NODE_1_length_1538194_cov_1083.054483_1279	-	1220779	1221267	489	pdaD	CDS	K02626	arginine decarboxylase [EC:4.1.1.19]
NODE_1_length_1538194_cov_1083.054483_1280	-	1221558	1222925	1368	aprE	CDS	K01342	subtilisin [EC:3.4.21.62]
NODE_1_length_1538194_cov_1083.054483_1281	+	1223159	1223677	519	bioY	CDS	K03523	biotin transport system substrate-specific component
NODE_1_length_1538194_cov_1083.054483_1282	-	1223715	1224242	528	dcd	CDS	K01494	dCTP deaminase [EC:3.5.4.13]
NODE_1_length_1538194_cov_1083.054483_1283	+	1224420	1225304	885	map	CDS	K01265	methionyl aminopeptidase [EC:3.4.11.18]
NODE_1_length_1538194_cov_1083.054483_1284	-	1225343	1225978	636		CDS
NODE_1_length_1538194_cov_1083.054483_1285	+	1226036	1226698	663	NTH	CDS	K10773	endonuclease III [EC:4.2.99.18]
NODE_1_length_1538194_cov_1083.054483_1286	-	1226798	1226977	180		CDS
NODE_1_length_1538194_cov_1083.054483_1287	-	1227035	1227304	270		CDS
NODE_1_length_1538194_cov_1083.054483_1288	-	1227431	1227862	432	K07006	CDS	K07006	uncharacterized protein
NODE_1_length_1538194_cov_1083.054483_1289	-	1228016	1230610	2595	mgtA, mgtB	CDS	K01531	P-type Mg2+ transporter [EC:7.2.2.14]
NODE_1_length_1538194_cov_1083.054483_1290	-	1230775	1231530	756	AS3MT	CDS	K07755	arsenite methyltransferase [EC:2.1.1.137]
NODE_1_length_1538194_cov_1083.054483_1291	+	1231803	1232000	198		CDS
NODE_1_length_1538194_cov_1083.054483_1292	-	1232715	1234247	1533	K09744	CDS	K09744	uncharacterized protein
NODE_1_length_1538194_cov_1083.054483_1293	-	1234247	1235578	1332		CDS
NODE_1_length_1538194_cov_1083.054483_1294	-	1235619	1236758	1140		CDS
NODE_1_length_1538194_cov_1083.054483_1295	+	1237042	1238307	1266	cdc6A	CDS	K10725	archaeal cell division control protein 6
NODE_1_length_1538194_cov_1083.054483_1296	+	1238421	1238963	543	K09120	CDS	K09120	uncharacterized protein
NODE_1_length_1538194_cov_1083.054483_1297	-	1239014	1240636	1623	polB	CDS	K02323	DNA polymerase II small subunit [EC:2.7.7.7]
NODE_1_length_1538194_cov_1083.054483_1298	+	1240775	1241773	999		CDS
NODE_1_length_1538194_cov_1083.054483_1299	+	1241810	1242178	369	speD, AMD1	CDS	K01611	S-adenosylmethionine decarboxylase [EC:4.1.1.50]
NODE_1_length_1538194_cov_1083.054483_1300	+	1242175	1243083	909	speE, SRM, SPE3	CDS	K00797	spermidine synthase [EC:2.5.1.16]
NODE_1_length_1538194_cov_1083.054483_1301	+	1243472	1243750	279		CDS
NODE_1_length_1538194_cov_1083.054483_1302	-	1243733	1243939	207		CDS
NODE_1_length_1538194_cov_1083.054483_1303	-	1244173	1245795	1623	lysK	CDS	K04566	lysyl-tRNA synthetase, class I [EC:6.1.1.6]
NODE_1_length_1538194_cov_1083.054483_1304	-	1245806	1246489	684		CDS
NODE_1_length_1538194_cov_1083.054483_1305	-	1247183	1248286	1104	thrC	CDS	K01733	threonine synthase [EC:4.2.3.1]
NODE_1_length_1538194_cov_1083.054483_1306	-	1248509	1249813	1305	paaK	CDS	K01912	phenylacetate-CoA ligase [EC:6.2.1.30]
NODE_1_length_1538194_cov_1083.054483_1307	-	1249806	1251281	1476	panF	CDS	K14392	sodium/pantothenate symporter
NODE_1_length_1538194_cov_1083.054483_1308	+	1251579	1252097	519		CDS
NODE_1_length_1538194_cov_1083.054483_1309	+	1252166	1252453	288		CDS
NODE_1_length_1538194_cov_1083.054483_1310	+	1252591	1253409	819		CDS
NODE_1_length_1538194_cov_1083.054483_1311	+	1253414	1254589	1176	CARS, cysS	CDS	K01883	cysteinyl-tRNA synthetase [EC:6.1.1.16]
NODE_1_length_1538194_cov_1083.054483_1312	-	1254657	1255097	441		CDS
NODE_1_length_1538194_cov_1083.054483_1313	+	1255168	1256328	1161		CDS
NODE_1_length_1538194_cov_1083.054483_1314	-	1256312	1256842	531	nob1	CDS	K07060	endoribonuclease Nob1 [EC:3.1.-.-]
NODE_1_length_1538194_cov_1083.054483_1315	-	1256842	1257678	837	ppnK, NADK	CDS	K00858	NAD+ kinase [EC:2.7.1.23]
NODE_1_length_1538194_cov_1083.054483_1316	+	1257851	1258876	1026	mtaA	CDS	K14080	[methyl-Co(III) methanol/glycine betaine-specific corrinoid protein]:coenzyme M methyltransferase [EC:2.1.1.246 2.1.1.377]
NODE_1_length_1538194_cov_1083.054483_1317	+	1258887	1259561	675		CDS
NODE_1_length_1538194_cov_1083.054483_1318	+	1259816	1260166	351		CDS
NODE_1_length_1538194_cov_1083.054483_1319	+	1260166	1261740	1575		CDS
NODE_1_length_1538194_cov_1083.054483_1320	-	1261982	1262329	348		CDS
NODE_1_length_1538194_cov_1083.054483_1321	-	1262887	1263441	555		CDS
NODE_1_length_1538194_cov_1083.054483_1322	+	1264031	1264426	396	EIF5A	CDS	K03263	translation initiation factor 5A
NODE_1_length_1538194_cov_1083.054483_1323	+	1264507	1265853	1347	SRP54, ffh	CDS	K03106	signal recognition particle subunit SRP54 [EC:3.6.5.4]
NODE_1_length_1538194_cov_1083.054483_1324	+	1265864	1266388	525	trmY	CDS	K16317	tRNA (pseudouridine54-N1)-methyltransferase [EC:2.1.1.257]
NODE_1_length_1538194_cov_1083.054483_1325	+	1266508	1267821	1314	PUS10	CDS	K07583	tRNA pseudouridine synthase 10 [EC:5.4.99.25]
NODE_1_length_1538194_cov_1083.054483_1326	+	1267824	1268120	297	RP-L21e, RPL21	CDS	K02889	large subunit ribosomal protein L21e
NODE_1_length_1538194_cov_1083.054483_1327	+	1268121	1268450	330	rpoF	CDS	K03051	DNA-directed RNA polymerase subunit F [EC:2.7.7.6]
NODE_1_length_1538194_cov_1083.054483_1328	+	1268509	1269099	591	K07572	CDS	K07572	putative nucleotide binding protein
NODE_1_length_1538194_cov_1083.054483_1329	+	1269102	1269959	858	ksgA	CDS	K02528	16S rRNA (adenine1518-N6/adenine1519-N6)-dimethyltransferase [EC:2.1.1.182]
NODE_1_length_1538194_cov_1083.054483_1330	+	1269934	1270509	576	hemK, prmC, HEMK	CDS	K02493	release factor glutamine methyltransferase [EC:2.1.1.297]
NODE_1_length_1538194_cov_1083.054483_1331	+	1270584	1271084	501	RP-L10e, RPL10	CDS	K02866	large subunit ribosomal protein L10e
NODE_1_length_1538194_cov_1083.054483_1332	+	1271157	1272122	966	DPH1, dph2	CDS	K07561	2-(3-amino-3-carboxypropyl)histidine synthase [EC:2.5.1.108]
NODE_1_length_1538194_cov_1083.054483_1333	+	1272140	1272823	684		CDS
NODE_1_length_1538194_cov_1083.054483_1334	+	1272805	1273359	555	CSL4, EXOSC1	CDS	K07573	exosome complex component CSL4
NODE_1_length_1538194_cov_1083.054483_1335	+	1273367	1273642	276	rpoL	CDS	K03056	DNA-directed RNA polymerase subunit L [EC:2.7.7.6]
NODE_1_length_1538194_cov_1083.054483_1336	+	1273771	1274199	429		CDS
NODE_1_length_1538194_cov_1083.054483_1337	+	1274200	1274547	348		CDS
NODE_1_length_1538194_cov_1083.054483_1338	+	1274658	1274987	330	tfs	CDS	K03057	transcription factor S
NODE_1_length_1538194_cov_1083.054483_1339	+	1275105	1275857	753	PCNA	CDS	K04802	proliferating cell nuclear antigen
NODE_1_length_1538194_cov_1083.054483_1340	+	1275871	1276953	1083	priL, pri2, priB	CDS	K18882	DNA primase large subunit
NODE_1_length_1538194_cov_1083.054483_1341	+	1276925	1278148	1224	priS, pri1, priA	CDS	K02683	DNA primase small subunit [EC:2.7.7.102]
NODE_1_length_1538194_cov_1083.054483_1342	+	1278154	1278627	474		CDS
NODE_1_length_1538194_cov_1083.054483_1343	+	1278633	1278908	276	RP-L44e, RPL44	CDS	K02929	large subunit ribosomal protein L44e
NODE_1_length_1538194_cov_1083.054483_1344	+	1278919	1279116	198	RP-S27e, RPS27	CDS	K02978	small subunit ribosomal protein S27e
NODE_1_length_1538194_cov_1083.054483_1345	+	1279252	1280037	786	EIF2S1	CDS	K03237	translation initiation factor 2 subunit 1
NODE_1_length_1538194_cov_1083.054483_1346	+	1280050	1280229	180	NOP10, NOLA3	CDS	K11130	H/ACA ribonucleoprotein complex subunit 3
NODE_1_length_1538194_cov_1083.054483_1347	-	1280292	1282325	2034	STT3	CDS	K07151	dolichyl-diphosphooligosaccharide---protein glycosyltransferase [EC:2.4.99.18]
NODE_1_length_1538194_cov_1083.054483_1348	+	1282477	1285644	3168	IARS, ileS	CDS	K01870	isoleucyl-tRNA synthetase [EC:6.1.1.5]
NODE_1_length_1538194_cov_1083.054483_1349	+	1285684	1286811	1128		CDS
NODE_1_length_1538194_cov_1083.054483_1350	-	1286835	1287242	408	gcvH, GCSH	CDS	K02437	glycine cleavage system H protein
NODE_1_length_1538194_cov_1083.054483_1351	-	1287381	1287587	207		CDS
NODE_1_length_1538194_cov_1083.054483_1352	-	1287556	1288113	558		CDS
NODE_1_length_1538194_cov_1083.054483_1353	+	1288168	1290222	2055	topA	CDS	K03168	DNA topoisomerase I [EC:5.6.2.1]
NODE_1_length_1538194_cov_1083.054483_1354	+	1290219	1290446	228		CDS
NODE_1_length_1538194_cov_1083.054483_1355	-	1290418	1291908	1491	argH, ASL	CDS	K01755	argininosuccinate lyase [EC:4.3.2.1]
NODE_1_length_1538194_cov_1083.054483_1356	-	1291928	1293124	1197	argG, ASS1	CDS	K01940	argininosuccinate synthase [EC:6.3.4.5]
NODE_1_length_1538194_cov_1083.054483_1357	-	1293212	1294648	1437		CDS
NODE_1_length_1538194_cov_1083.054483_1358	-	1294819	1295334	516		CDS
NODE_1_length_1538194_cov_1083.054483_1359	-	1295336	1296109	774	K09722, pps	CDS	K09722	4-phosphopantoate---beta-alanine ligase [EC:6.3.2.36]
NODE_1_length_1538194_cov_1083.054483_1360	-	1296094	1297047	954	pok	CDS	K06982	pantoate kinase [EC:2.7.1.169]
NODE_1_length_1538194_cov_1083.054483_1361	-	1297044	1298285	1242	coaBC, dfp	CDS	K13038	phosphopantothenoylcysteine decarboxylase / phosphopantothenate---cysteine ligase [EC:4.1.1.36 6.3.2.5]
NODE_1_length_1538194_cov_1083.054483_1362	+	1298437	1298787	351		CDS
NODE_1_length_1538194_cov_1083.054483_1363	-	1298794	1299276	483	carS	CDS	K19664	CDP-2,3-bis-(O-geranylgeranyl)-sn-glycerol synthase [EC:2.7.7.67]
NODE_1_length_1538194_cov_1083.054483_1364	-	1299269	1299940	672	radB	CDS	K04484	DNA repair protein RadB
NODE_1_length_1538194_cov_1083.054483_1365	-	1300105	1302030	1926	ERCC2, XPD	CDS	K10844	DNA excision repair protein ERCC-2 [EC:5.6.2.3]
NODE_1_length_1538194_cov_1083.054483_1366	+	1302263	1303588	1326	K25518	CDS	K25518	trans-anhydromevalonate 5-phosphate decarboxylase [EC:4.1.1.-]
NODE_1_length_1538194_cov_1083.054483_1367	+	1303663	1304865	1203	acnX1	CDS	K25517	mevalonate 5-phosphate dehydratase large subunit [EC:4.2.1.-]
NODE_1_length_1538194_cov_1083.054483_1368	+	1304849	1305283	435	acnX2	CDS	K09128	mevalonate 5-phosphate dehydratase small subunit [EC:4.2.1.-]
NODE_1_length_1538194_cov_1083.054483_1369	+	1305505	1306764	1260	K06885	CDS	K06885	uncharacterized protein
NODE_1_length_1538194_cov_1083.054483_1370	-	1306814	1307422	609	tmk, DTYMK	CDS	K00943	dTMP kinase [EC:2.7.4.9]
NODE_1_length_1538194_cov_1083.054483_1371	+	1307487	1308272	786		CDS
NODE_1_length_1538194_cov_1083.054483_1372	-	1308269	1308622	354	K07143	CDS	K07143	UPF0148 protein
NODE_1_length_1538194_cov_1083.054483_1373	+	1308688	1308942	255	K09721	CDS	K09721	uncharacterized protein
NODE_1_length_1538194_cov_1083.054483_1374	-	1308949	1309776	828	E3.1.3.25, IMPA, suhB	CDS	K01092	myo-inositol-1(or 4)-monophosphatase [EC:3.1.3.25]
NODE_1_length_1538194_cov_1083.054483_1375	+	1310320	1310964	645		CDS
NODE_1_length_1538194_cov_1083.054483_1376	+	1310976	1311641	666		CDS
NODE_1_length_1538194_cov_1083.054483_1377	+	1311709	1312992	1284	SEC11, sipW	CDS	K13280	signal peptidase I [EC:3.4.21.89]
NODE_1_length_1538194_cov_1083.054483_1378	+	1312982	1313716	735		CDS
NODE_1_length_1538194_cov_1083.054483_1379	+	1313746	1314777	1032		CDS
NODE_1_length_1538194_cov_1083.054483_1380	+	1314915	1315190	276		CDS
NODE_1_length_1538194_cov_1083.054483_1381	+	1315507	1315899	393		CDS
NODE_1_length_1538194_cov_1083.054483_1382	-	1316096	1316932	837	K03653	CDS	K03653	N-glycosylase/DNA lyase [EC:3.2.2.- 4.2.99.18]
NODE_1_length_1538194_cov_1083.054483_1383	+	1317064	1317738	675	PRDX2_4, ahpC	CDS	K03386	peroxiredoxin 2/4 [EC:1.11.1.24]
NODE_1_length_1538194_cov_1083.054483_1384	+	1317735	1318115	381	dfx	CDS	K05919	superoxide reductase [EC:1.15.1.2]
NODE_1_length_1538194_cov_1083.054483_1385	+	1318272	1319636	1365	glnA, GLUL	CDS	K01915	glutamine synthetase [EC:6.3.1.2]
NODE_1_length_1538194_cov_1083.054483_1386	-	1319854	1320453	600		CDS
NODE_1_length_1538194_cov_1083.054483_1387	-	1321025	1322050	1026	cheB	CDS	K03412	two-component system, chemotaxis family, protein-glutamate methylesterase/glutaminase [EC:3.1.1.61 3.5.1.44]
NODE_1_length_1538194_cov_1083.054483_1388	-	1322140	1323171	1032		CDS
NODE_1_length_1538194_cov_1083.054483_1389	-	1323288	1323599	312		CDS
NODE_1_length_1538194_cov_1083.054483_1390	+	1323756	1323959	204		CDS
NODE_1_length_1538194_cov_1083.054483_1391	+	1323969	1324751	783		CDS
NODE_1_length_1538194_cov_1083.054483_1392	+	1324832	1327063	2232	cheA	CDS	K03407	two-component system, chemotaxis family, sensor kinase CheA [EC:2.7.13.3]
NODE_1_length_1538194_cov_1083.054483_1393	+	1327535	1328374	840	mcp	CDS	K03406	methyl-accepting chemotaxis protein
NODE_1_length_1538194_cov_1083.054483_1394	+	1328685	1329206	522	cheW	CDS	K03408	purine-binding chemotaxis protein CheW
NODE_1_length_1538194_cov_1083.054483_1395	+	1329224	1329595	372	cheY	CDS	K03413	two-component system, chemotaxis family, chemotaxis protein CheY
NODE_1_length_1538194_cov_1083.054483_1396	+	1329612	1330151	540		CDS
NODE_1_length_1538194_cov_1083.054483_1397	+	1330126	1330662	537	cheD	CDS	K03411	chemotaxis protein CheD [EC:3.5.1.44]
NODE_1_length_1538194_cov_1083.054483_1398	+	1330710	1331672	963		CDS
NODE_1_length_1538194_cov_1083.054483_1399	-	1331842	1332996	1155		CDS
NODE_1_length_1538194_cov_1083.054483_1400	-	1333046	1334653	1608	flaJ	CDS	K07333	archaeal flagellar protein FlaJ
NODE_1_length_1538194_cov_1083.054483_1401	-	1334683	1336452	1770	flaI	CDS	K07332	archaeal flagellar protein FlaI
NODE_1_length_1538194_cov_1083.054483_1402	-	1336551	1337273	723	flaH	CDS	K07331	archaeal flagellar protein FlaH
NODE_1_length_1538194_cov_1083.054483_1403	-	1337393	1337905	513		CDS
NODE_1_length_1538194_cov_1083.054483_1404	-	1337921	1338400	480	flaG	CDS	K07330	archaeal flagellar protein FlaG
NODE_1_length_1538194_cov_1083.054483_1405	-	1338442	1339482	1041		CDS
NODE_1_length_1538194_cov_1083.054483_1406	-	1339693	1340358	666	flaB	CDS	K07325	archaeal flagellin FlaB
NODE_1_length_1538194_cov_1083.054483_1407	+	1340987	1341265	279		CDS
NODE_1_length_1538194_cov_1083.054483_1408	+	1341561	1342346	786		CDS
NODE_1_length_1538194_cov_1083.054483_1409	+	1343008	1344861	1854		CDS
NODE_1_length_1538194_cov_1083.054483_1410	-	1345062	1345205	144		CDS
NODE_1_length_1538194_cov_1083.054483_1411	-	1345424	1345843	420	bfr	CDS	K03594	bacterioferritin [EC:1.16.3.1]
NODE_1_length_1538194_cov_1083.054483_1412	-	1345910	1347157	1248	K07089	CDS	K07089	uncharacterized protein
NODE_1_length_1538194_cov_1083.054483_1413	-	1347154	1348452	1299		CDS
NODE_1_length_1538194_cov_1083.054483_1414	-	1348519	1349214	696		CDS
NODE_1_length_1538194_cov_1083.054483_1415	+	1349471	1350502	1032	galE, GALE	CDS	K01784	UDP-glucose 4-epimerase [EC:5.1.3.2]
NODE_1_length_1538194_cov_1083.054483_1416	-	1350757	1352034	1278		CDS
NODE_1_length_1538194_cov_1083.054483_1417	+	1352098	1353456	1359	gcvPA	CDS	K00282	glycine dehydrogenase subunit 1 [EC:1.4.4.2]
NODE_1_length_1538194_cov_1083.054483_1418	+	1353449	1354966	1518	gcvPB	CDS	K00283	glycine dehydrogenase subunit 2 [EC:1.4.4.2]
NODE_1_length_1538194_cov_1083.054483_1419	-	1354951	1356510	1560	mnhD, mrpD	CDS	K05568	multicomponent Na+:H+ antiporter subunit D
NODE_1_length_1538194_cov_1083.054483_1420	-	1356507	1356881	375	mnhC, mrpC	CDS	K05567	multicomponent Na+:H+ antiporter subunit C
NODE_1_length_1538194_cov_1083.054483_1421	-	1356878	1357654	777	mnhB, mrpB	CDS	K05566	multicomponent Na+:H+ antiporter subunit B
NODE_1_length_1538194_cov_1083.054483_1422	-	1357651	1357902	252		CDS
NODE_1_length_1538194_cov_1083.054483_1423	-	1357899	1358279	381	mnhG, mrpG	CDS	K05571	multicomponent Na+:H+ antiporter subunit G
NODE_1_length_1538194_cov_1083.054483_1424	-	1358242	1358511	270	mnhF, mrpF	CDS	K05570	multicomponent Na+:H+ antiporter subunit F
NODE_1_length_1538194_cov_1083.054483_1425	-	1358508	1358999	492	mnhE, mrpE	CDS	K05569	multicomponent Na+:H+ antiporter subunit E
NODE_1_length_1538194_cov_1083.054483_1426	-	1359004	1360443	1440	nuoM	CDS	K00342	NADH-quinone oxidoreductase subunit M [EC:7.1.1.2]
NODE_1_length_1538194_cov_1083.054483_1427	-	1360440	1362419	1980	nuoL	CDS	K00341	NADH-quinone oxidoreductase subunit L [EC:7.1.1.2]
NODE_1_length_1538194_cov_1083.054483_1428	+	1362702	1362989	288		CDS
NODE_1_length_1538194_cov_1083.054483_1429	+	1362995	1363273	279	moaD, cysO	CDS	K03636	sulfur-carrier protein
NODE_1_length_1538194_cov_1083.054483_1430	-	1363260	1364516	1257	CDKAL1	CDS	K15865	threonylcarbamoyladenosine tRNA methylthiotransferase CDKAL1 [EC:2.8.4.5]
NODE_1_length_1538194_cov_1083.054483_1431	-	1364534	1365196	663		CDS
NODE_1_length_1538194_cov_1083.054483_1432	-	1365209	1367236	2028	MARS, metG	CDS	K01874	methionyl-tRNA synthetase [EC:6.1.1.10]
NODE_1_length_1538194_cov_1083.054483_1433	+	1367388	1367801	414	EIF2S2	CDS	K03238	translation initiation factor 2 subunit 2
NODE_1_length_1538194_cov_1083.054483_1434	+	1367811	1368119	309	K09148	CDS	K09148	uncharacterized protein
NODE_1_length_1538194_cov_1083.054483_1435	+	1368131	1369225	1095	NMD3	CDS	K07562	60S ribosomal export protein NMD3
NODE_1_length_1538194_cov_1083.054483_1436	+	1369482	1370807	1326	HARS, hisS	CDS	K01892	histidyl-tRNA synthetase [EC:6.1.1.21]
NODE_1_length_1538194_cov_1083.054483_1437	-	1370772	1371554	783	E2.5.1.42	CDS	K17105	geranylgeranylglycerol-phosphate geranylgeranyltransferase [EC:2.5.1.42]
NODE_1_length_1538194_cov_1083.054483_1438	-	1371616	1372143	528	endA	CDS	K01170	tRNA-intron endonuclease, archaea type [EC:4.6.1.16]
NODE_1_length_1538194_cov_1083.054483_1439	+	1372260	1372673	414	hycI	CDS	K08315	hydrogenase 3 maturation protease [EC:3.4.23.51]
NODE_1_length_1538194_cov_1083.054483_1440	+	1372677	1373708	1032	mtnA	CDS	K08963	methylthioribose-1-phosphate isomerase [EC:5.3.1.23]
NODE_1_length_1538194_cov_1083.054483_1441	-	1373679	1374416	738	APRT, apt	CDS	K00759	adenine phosphoribosyltransferase [EC:2.4.2.7]
NODE_1_length_1538194_cov_1083.054483_1442	-	1374483	1374920	438	dcd	CDS	K01494	dCTP deaminase [EC:3.5.4.13]
NODE_1_length_1538194_cov_1083.054483_1443	-	1374926	1375324	399	K06934	CDS	K06934	uncharacterized protein
NODE_1_length_1538194_cov_1083.054483_1444	+	1375533	1376984	1452	mmsA, iolA, ALDH6A1	CDS	K00140	malonate-semialdehyde dehydrogenase (acetylating) / methylmalonate-semialdehyde dehydrogenase [EC:1.2.1.18 1.2.1.27]
NODE_1_length_1538194_cov_1083.054483_1445	+	1376986	1377405	420		CDS
NODE_1_length_1538194_cov_1083.054483_1446	-	1378344	1379285	942		CDS
NODE_1_length_1538194_cov_1083.054483_1447	-	1379306	1380475	1170		CDS
NODE_1_length_1538194_cov_1083.054483_1448	+	1380533	1380844	312	cutA	CDS	K03926	periplasmic divalent cation tolerance protein
NODE_1_length_1538194_cov_1083.054483_1449	+	1380923	1381570	648	K07073	CDS	K07073	uncharacterized protein
NODE_1_length_1538194_cov_1083.054483_1450	+	1381700	1382035	336		CDS
NODE_1_length_1538194_cov_1083.054483_1451	+	1382114	1383118	1005	K07129	CDS	K07129	uncharacterized protein
NODE_1_length_1538194_cov_1083.054483_1452	-	1383115	1384185	1071	PELO, DOM34, pelA	CDS	K06965	protein pelota
NODE_1_length_1538194_cov_1083.054483_1453	+	1384350	1384691	342	rimI	CDS	K03789	[ribosomal protein S18]-alanine N-acetyltransferase [EC:2.3.1.266]
NODE_1_length_1538194_cov_1083.054483_1454	-	1384681	1385976	1296	dnaG	CDS	K02316	DNA primase [EC:2.7.7.101]
NODE_1_length_1538194_cov_1083.054483_1455	-	1386130	1387194	1065	YARS, tyrS	CDS	K01866	tyrosyl-tRNA synthetase [EC:6.1.1.1]
NODE_1_length_1538194_cov_1083.054483_1456	-	1387496	1389163	1668	FARSB, pheT	CDS	K01890	phenylalanyl-tRNA synthetase beta chain [EC:6.1.1.20]
NODE_1_length_1538194_cov_1083.054483_1457	-	1389167	1390633	1467	FARSA, pheS	CDS	K01889	phenylalanyl-tRNA synthetase alpha chain [EC:6.1.1.20]
NODE_1_length_1538194_cov_1083.054483_1458	-	1390654	1391124	471	E2.7.7.3B	CDS	K02201	pantetheine-phosphate adenylyltransferase [EC:2.7.7.3]
NODE_1_length_1538194_cov_1083.054483_1459	-	1391128	1391487	360		CDS
NODE_1_length_1538194_cov_1083.054483_1460	-	1391499	1392620	1122		CDS
NODE_1_length_1538194_cov_1083.054483_1461	-	1392866	1393105	240		CDS
NODE_1_length_1538194_cov_1083.054483_1462	+	1393239	1394321	1083		CDS
NODE_1_length_1538194_cov_1083.054483_1463	+	1394534	1395562	1029	frhB	CDS	K00441	coenzyme F420 hydrogenase subunit beta [EC:1.12.98.1]
NODE_1_length_1538194_cov_1083.054483_1464	+	1396763	1397578	816		CDS
NODE_1_length_1538194_cov_1083.054483_1465	+	1397629	1397919	291		CDS
NODE_1_length_1538194_cov_1083.054483_1466	+	1397966	1398262	297		CDS
NODE_1_length_1538194_cov_1083.054483_1467	-	1398692	1399378	687	pyrH	CDS	K09903	uridylate kinase [EC:2.7.4.22]
NODE_1_length_1538194_cov_1083.054483_1468	+	1399433	1400707	1275	ETF1, ERF1	CDS	K03265	peptide chain release factor subunit 1
NODE_1_length_1538194_cov_1083.054483_1469	-	1400709	1401521	813	proC	CDS	K00286	pyrroline-5-carboxylate reductase [EC:1.5.1.2]
NODE_1_length_1538194_cov_1083.054483_1470	-	1401518	1402858	1341	proA	CDS	K00147	glutamate-5-semialdehyde dehydrogenase [EC:1.2.1.41]
NODE_1_length_1538194_cov_1083.054483_1471	-	1402848	1403672	825	proB	CDS	K00931	glutamate 5-kinase [EC:2.7.2.11]
NODE_1_length_1538194_cov_1083.054483_1472	+	1404135	1404500	366		CDS
NODE_1_length_1538194_cov_1083.054483_1473	-	1405087	1405428	342		CDS
NODE_1_length_1538194_cov_1083.054483_1474	+	1405879	1406058	180		CDS
NODE_1_length_1538194_cov_1083.054483_1475	+	1410882	1412393	1512	E3.4.17.19	CDS	K01299	carboxypeptidase Taq [EC:3.4.17.19]
NODE_1_length_1538194_cov_1083.054483_1476	-	1412452	1413297	846	cbiO	CDS	K02006	cobalt/nickel transport system ATP-binding protein
NODE_1_length_1538194_cov_1083.054483_1477	-	1413301	1414122	822	cbiQ	CDS	K02008	cobalt/nickel transport system permease protein
NODE_1_length_1538194_cov_1083.054483_1478	-	1414119	1414463	345		CDS
NODE_1_length_1538194_cov_1083.054483_1479	-	1414456	1415112	657	cbiM	CDS	K02007	cobalt/nickel transport system permease protein
NODE_1_length_1538194_cov_1083.054483_1480	+	1416042	1416695	654		CDS
NODE_1_length_1538194_cov_1083.054483_1481	-	1416918	1417454	537	TSR3	CDS	K09140	pre-rRNA-processing protein TSR3
NODE_1_length_1538194_cov_1083.054483_1482	+	1417522	1417758	237		CDS
NODE_1_length_1538194_cov_1083.054483_1483	+	1417772	1419103	1332	tiaS	CDS	K06932	tRNA(Ile2)-agmatinylcytidine synthase [EC:6.3.4.22]
NODE_1_length_1538194_cov_1083.054483_1484	-	1419056	1419334	279		CDS
NODE_1_length_1538194_cov_1083.054483_1485	+	1419642	1419971	330		CDS
NODE_1_length_1538194_cov_1083.054483_1486	+	1420262	1420528	267		CDS
NODE_1_length_1538194_cov_1083.054483_1487	-	1420545	1421117	573		CDS
NODE_1_length_1538194_cov_1083.054483_1488	+	1421624	1421824	201		CDS
NODE_1_length_1538194_cov_1083.054483_1489	+	1421873	1423132	1260	mcrC	CDS	K19147	5-methylcytosine-specific restriction enzyme subunit McrC
NODE_1_length_1538194_cov_1083.054483_1490	+	1423129	1424769	1641	mcrB	CDS	K07452	5-methylcytosine-specific restriction enzyme B [EC:3.1.21.-]
NODE_1_length_1538194_cov_1083.054483_1491	-	1424924	1427803	2880		CDS
NODE_1_length_1538194_cov_1083.054483_1492	-	1427968	1428987	1020		CDS
NODE_1_length_1538194_cov_1083.054483_1493	-	1429090	1429407	318		CDS
NODE_1_length_1538194_cov_1083.054483_1494	-	1429761	1430075	315		CDS
NODE_1_length_1538194_cov_1083.054483_1495	+	1431187	1431597	411		CDS
NODE_1_length_1538194_cov_1083.054483_1496	-	1431602	1432234	633		CDS
NODE_1_length_1538194_cov_1083.054483_1497	-	1432385	1432939	555		CDS
NODE_1_length_1538194_cov_1083.054483_1498	+	1433006	1435324	2319	hypF	CDS	K04656	hydrogenase maturation protein HypF
NODE_1_length_1538194_cov_1083.054483_1499	-	1435571	1437307	1737	K08979	CDS	K08979	putative membrane protein
NODE_1_length_1538194_cov_1083.054483_1500	+	1437440	1438426	987	K07577	CDS	K07577	putative mRNA 3-end processing factor
NODE_1_length_1538194_cov_1083.054483_1501	-	1438431	1438598	168		CDS
NODE_1_length_1538194_cov_1083.054483_1502	+	1438700	1440019	1320	glyA, SHMT	CDS	K00600	glycine hydroxymethyltransferase [EC:2.1.2.1]
NODE_1_length_1538194_cov_1083.054483_1503	+	1440053	1440883	831		CDS
NODE_1_length_1538194_cov_1083.054483_1504	-	1440875	1444327	3453	polC	CDS	K02322	DNA polymerase II large subunit [EC:2.7.7.7]
NODE_1_length_1538194_cov_1083.054483_1505	-	1444324	1444902	579		CDS
NODE_1_length_1538194_cov_1083.054483_1506	-	1444886	1445647	762	E2.5.1.41	CDS	K17104	phosphoglycerol geranylgeranyltransferase [EC:2.5.1.41]
NODE_1_length_1538194_cov_1083.054483_1507	-	1445634	1445885	252		CDS
NODE_1_length_1538194_cov_1083.054483_1508	-	1445957	1447045	1089	RFA1, RPA1, rpa	CDS	K07466	replication factor A1
NODE_1_length_1538194_cov_1083.054483_1509	-	1447100	1447477	378		CDS
NODE_1_length_1538194_cov_1083.054483_1510	+	1447554	1448933	1380	K07137	CDS	K07137	uncharacterized protein
NODE_1_length_1538194_cov_1083.054483_1511	+	1448999	1449712	714		CDS
NODE_1_length_1538194_cov_1083.054483_1512	+	1449969	1450673	705	K07731	CDS	K07731	putative transcriptional regulator
NODE_1_length_1538194_cov_1083.054483_1513	+	1450760	1451824	1065	HMGCS	CDS	K01641	hydroxymethylglutaryl-CoA synthase [EC:2.3.3.10]
NODE_1_length_1538194_cov_1083.054483_1514	+	1451844	1452998	1155	ACAT, atoB	CDS	K00626	acetyl-CoA C-acetyltransferase [EC:2.3.1.9]
NODE_1_length_1538194_cov_1083.054483_1515	+	1453000	1453395	396	K07068	CDS	K07068	uncharacterized protein
NODE_1_length_1538194_cov_1083.054483_1516	+	1453445	1455715	2271	nrdD	CDS	K21636	ribonucleoside-triphosphate reductase (formate) [EC:1.1.98.6]
NODE_1_length_1538194_cov_1083.054483_1517	-	1455705	1456055	351	EGD2, NACA	CDS	K03626	nascent polypeptide-associated complex subunit alpha
NODE_1_length_1538194_cov_1083.054483_1518	-	1456062	1456571	510	K07398	CDS	K07398	conserved protein with predicted RNA binding PUA domain
NODE_1_length_1538194_cov_1083.054483_1519	-	1456537	1457724	1188	psmR	CDS	K03420	proteasome regulatory subunit
NODE_1_length_1538194_cov_1083.054483_1520	+	1457794	1458282	489	MBF1	CDS	K03627	putative transcription factor
NODE_1_length_1538194_cov_1083.054483_1521	+	1458313	1458870	558	atrm56	CDS	K07254	tRNA (cytidine56-2'-O)-methyltransferase [EC:2.1.1.206]
NODE_1_length_1538194_cov_1083.054483_1522	+	1458917	1459420	504	TFIIE1, GTF2E1, TFA1, tfe	CDS	K03136	transcription initiation factor TFIIE subunit alpha
NODE_1_length_1538194_cov_1083.054483_1523	-	1459611	1460039	429		CDS
NODE_1_length_1538194_cov_1083.054483_1524	-	1460084	1461082	999		CDS
NODE_1_length_1538194_cov_1083.054483_1525	+	1461224	1461649	426	K06934	CDS	K06934	uncharacterized protein
NODE_1_length_1538194_cov_1083.054483_1526	+	1461694	1463091	1398		CDS
NODE_1_length_1538194_cov_1083.054483_1527	-	1463109	1463324	216		CDS
NODE_1_length_1538194_cov_1083.054483_1528	-	1463865	1464485	621		CDS
NODE_1_length_1538194_cov_1083.054483_1529	-	1464478	1465548	1071		CDS
NODE_1_length_1538194_cov_1083.054483_1530	-	1465656	1466453	798		CDS
NODE_1_length_1538194_cov_1083.054483_1531	+	1466569	1466754	186		CDS
NODE_1_length_1538194_cov_1083.054483_1532	+	1466754	1466915	162		CDS
NODE_1_length_1538194_cov_1083.054483_1533	+	1467347	1467943	597		CDS
NODE_1_length_1538194_cov_1083.054483_1534	-	1467917	1468762	846	E2.1.1.72	CDS	K00571	site-specific DNA-methyltransferase (adenine-specific) [EC:2.1.1.72]
NODE_1_length_1538194_cov_1083.054483_1535	+	1469407	1469595	189		CDS
NODE_1_length_1538194_cov_1083.054483_1536	+	1469592	1469792	201		CDS
NODE_1_length_1538194_cov_1083.054483_1537	+	1469789	1470550	762		CDS
NODE_1_length_1538194_cov_1083.054483_1538	+	1470547	1470672	126		CDS
NODE_1_length_1538194_cov_1083.054483_1539	+	1470669	1471175	507		CDS
NODE_1_length_1538194_cov_1083.054483_1540	+	1471185	1471382	198		CDS
NODE_1_length_1538194_cov_1083.054483_1541	+	1471370	1471540	171		CDS
NODE_1_length_1538194_cov_1083.054483_1542	+	1471612	1472082	471		CDS
NODE_1_length_1538194_cov_1083.054483_1543	+	1472119	1473888	1770		CDS
NODE_1_length_1538194_cov_1083.054483_1544	+	1474010	1474114	105		CDS
NODE_1_length_1538194_cov_1083.054483_1545	+	1474118	1475008	891		CDS
NODE_1_length_1538194_cov_1083.054483_1546	+	1475008	1475187	180		CDS
NODE_1_length_1538194_cov_1083.054483_1547	+	1475171	1475485	315		CDS
NODE_1_length_1538194_cov_1083.054483_1548	+	1475478	1475834	357		CDS
NODE_1_length_1538194_cov_1083.054483_1549	+	1475836	1477104	1269		CDS
NODE_1_length_1538194_cov_1083.054483_1550	-	1477302	1478327	1026	xerD	CDS	K04763	integrase/recombinase XerD
NODE_1_length_1538194_cov_1083.054483_1551	-	1478610	1479359	750		CDS
NODE_1_length_1538194_cov_1083.054483_1552	-	1479432	1480490	1059	asnB, ASNS	CDS	K01953	asparagine synthase (glutamine-hydrolysing) [EC:6.3.5.4]
NODE_1_length_1538194_cov_1083.054483_1553	+	1480506	1481105	600		CDS
NODE_1_length_1538194_cov_1083.054483_1554	+	1481149	1482315	1167	dapE	CDS	K01439	succinyl-diaminopimelate desuccinylase [EC:3.5.1.18]
NODE_1_length_1538194_cov_1083.054483_1555	+	1482415	1483443	1029		CDS
NODE_1_length_1538194_cov_1083.054483_1556	-	1483465	1483929	465		CDS
NODE_1_length_1538194_cov_1083.054483_1557	+	1484027	1484773	747	rfbA, rmlA, rffH	CDS	K00973	glucose-1-phosphate thymidylyltransferase [EC:2.7.7.24]
NODE_1_length_1538194_cov_1083.054483_1558	-	1484829	1485779	951	galE, GALE	CDS	K01784	UDP-glucose 4-epimerase [EC:5.1.3.2]
NODE_1_length_1538194_cov_1083.054483_1559	+	1485921	1487102	1182	aksA	CDS	K10977	methanogen homocitrate synthase [EC:2.3.3.14 2.3.3.-]
NODE_1_length_1538194_cov_1083.054483_1560	+	1487099	1487932	834		CDS
NODE_1_length_1538194_cov_1083.054483_1561	-	1487996	1490110	2115	mgsC	CDS	K22083	methylamine---glutamate N-methyltransferase subunit C [EC:2.1.1.21]
NODE_1_length_1538194_cov_1083.054483_1562	-	1490092	1491003	912	mgsA	CDS	K22081	methylamine---glutamate N-methyltransferase subunit A [EC:2.1.1.21]
NODE_1_length_1538194_cov_1083.054483_1563	-	1491130	1491558	429	glnK	CDS	K04752	nitrogen regulatory protein P-II 2
NODE_1_length_1538194_cov_1083.054483_1564	-	1491570	1492904	1335	amt, AMT, MEP	CDS	K03320	ammonium transporter, Amt family
NODE_1_length_1538194_cov_1083.054483_1565	+	1492969	1493574	606		CDS
NODE_1_length_1538194_cov_1083.054483_1566	+	1493658	1494902	1245		CDS
NODE_1_length_1538194_cov_1083.054483_1567	+	1494899	1495393	495	leuD, IPMI-S	CDS	K01704	3-isopropylmalate/(R)-2-methylmalate dehydratase small subunit [EC:4.2.1.33 4.2.1.35]
NODE_1_length_1538194_cov_1083.054483_1568	+	1495393	1496976	1584	E2.2.1.6L, ilvB, ilvG, ilvI	CDS	K01652	acetolactate synthase I/II/III large subunit [EC:2.2.1.6]
NODE_1_length_1538194_cov_1083.054483_1569	+	1497032	1498006	975		CDS
NODE_1_length_1538194_cov_1083.054483_1570	+	1497993	1499177	1185		CDS
NODE_1_length_1538194_cov_1083.054483_1571	+	1499274	1500278	1005	ALG7	CDS	K01001	UDP-N-acetylglucosamine--dolichyl-phosphate N-acetylglucosaminephosphotransferase [EC:2.7.8.15]
NODE_1_length_1538194_cov_1083.054483_1572	-	1500228	1500926	699		CDS
NODE_1_length_1538194_cov_1083.054483_1573	+	1501502	1502353	852		CDS
NODE_1_length_1538194_cov_1083.054483_1574	+	1502355	1503458	1104		CDS
NODE_1_length_1538194_cov_1083.054483_1575	+	1503891	1504697	807		CDS
NODE_1_length_1538194_cov_1083.054483_1576	-	1504904	1505596	693		CDS
NODE_1_length_1538194_cov_1083.054483_1577	-	1506010	1507086	1077	top6A	CDS	K03166	DNA topoisomerase VI subunit A [EC:5.6.2.2]
NODE_1_length_1538194_cov_1083.054483_1578	-	1507043	1508587	1545	top6B	CDS	K03167	DNA topoisomerase VI subunit B [EC:5.6.2.2]
NODE_1_length_1538194_cov_1083.054483_1579	-	1508591	1509241	651	KRR1	CDS	K06961	ribosomal RNA assembly protein
NODE_1_length_1538194_cov_1083.054483_1580	-	1509238	1510020	783	RIOK1	CDS	K07178	RIO kinase 1 [EC:2.7.11.1]
NODE_1_length_1538194_cov_1083.054483_1581	-	1510095	1510394	300	EIF1A	CDS	K03236	translation initiation factor 1A
NODE_1_length_1538194_cov_1083.054483_1582	+	1510658	1510864	207		CDS
NODE_1_length_1538194_cov_1083.054483_1583	+	1511362	1512330	969		CDS
NODE_1_length_1538194_cov_1083.054483_1584	+	1512440	1513231	792		CDS
NODE_1_length_1538194_cov_1083.054483_1585	+	1513715	1514320	606		CDS
NODE_1_length_1538194_cov_1083.054483_1586	+	1514788	1515555	768	ABC-2.A	CDS	K01990	ABC-2 type transport system ATP-binding protein
NODE_1_length_1538194_cov_1083.054483_1587	+	1515552	1517180	1629		CDS
NODE_1_length_1538194_cov_1083.054483_1588	-	1517190	1518914	1725	TC.KEF	CDS	K03455	monovalent cation:H+ antiporter-2, CPA2 family
NODE_1_length_1538194_cov_1083.054483_1589	-	1519044	1519757	714	tyrA2	CDS	K04517	prephenate dehydrogenase [EC:1.3.1.12]
NODE_1_length_1538194_cov_1083.054483_1590	-	1519754	1520812	1059	pheA	CDS	K14170	chorismate mutase / prephenate dehydratase [EC:5.4.99.5 4.2.1.51]
NODE_1_length_1538194_cov_1083.054483_1591	-	1520802	1521908	1107	aroC	CDS	K01736	chorismate synthase [EC:4.2.3.5]
NODE_1_length_1538194_cov_1083.054483_1592	-	1521905	1523200	1296	aroA	CDS	K00800	3-phosphoshikimate 1-carboxyvinyltransferase [EC:2.5.1.19]
NODE_1_length_1538194_cov_1083.054483_1593	-	1523190	1524056	867	aroK, aroL	CDS	K00891	shikimate kinase [EC:2.7.1.71]
NODE_1_length_1538194_cov_1083.054483_1594	-	1524053	1524910	858	aroE	CDS	K00014	shikimate dehydrogenase [EC:1.1.1.25]
NODE_1_length_1538194_cov_1083.054483_1595	-	1524907	1525584	678		CDS
NODE_1_length_1538194_cov_1083.054483_1596	-	1525589	1526677	1089	aroB	CDS	K01735	3-dehydroquinate synthase [EC:4.2.3.4]
NODE_1_length_1538194_cov_1083.054483_1597	-	1526674	1527654	981	AROA2, aroA	CDS	K03856	3-deoxy-7-phosphoheptulonate synthase [EC:2.5.1.54]
NODE_1_length_1538194_cov_1083.054483_1598	-	1527651	1528562	912	E2.2.1.1, tktA, tktB	CDS	K00615	transketolase [EC:2.2.1.1]
NODE_1_length_1538194_cov_1083.054483_1599	-	1528553	1529410	858	E2.2.1.1, tktA, tktB	CDS	K00615	transketolase [EC:2.2.1.1]
NODE_1_length_1538194_cov_1083.054483_1600	+	1529733	1531337	1605		CDS
NODE_1_length_1538194_cov_1083.054483_1601	-	1531362	1532018	657	DPH6	CDS	K06927	diphthine-ammonia ligase [EC:6.3.1.14]
NODE_1_length_1538194_cov_1083.054483_1602	-	1532122	1535364	3243	carB, CPA2	CDS	K01955	carbamoyl-phosphate synthase large subunit [EC:6.3.5.5]
NODE_1_length_1538194_cov_1083.054483_1603	-	1535357	1536484	1128	carA, CPA1	CDS	K01956	carbamoyl-phosphate synthase small subunit [EC:6.3.5.5]
NODE_1_length_1538194_cov_1083.054483_1604	+	1536571	1537299	729		CDS
NODE_1_length_1538194_cov_1083.054483_1605	+	1537309	1538010	702		CDS
NODE_1_length_1538194_cov_1083.054483_1606	-	1538078	1538194	117		CDS

## Sheet: Supplementary Table 2
Supplementary Table 2. Transcript of Verstraetearchaeum methanopetrocarbonis LWZ-6 grown on methanol and hydrogen.
Pathway	Gene_ID	Annotation	Gene	AM31 (FPKM)	AM32(FPKM)	AM33(FPKM)	AM31(RANK(%))	AM32(RANK(%))	AM33(RANK(%))
Methanogenesis	NODE_1_length_1538194_cov_1083.054483_1018	methyl-coenzyme M reductase alpha subunit	mcrA	15713.8	15511.7	16833.7	0.498132	0.373599	0.560399
	NODE_1_length_1538194_cov_1083.054483_1019	methyl-coenzyme M reductase gamma subunit	mcrG	14041.2	18331.4	17635.2	0.747198	0.249066	0.311333
	NODE_1_length_1538194_cov_1083.054483_1020	methyl-coenzyme M reductase beta subunit	mcrB	13484.4	15936.1	15465.5	0.871731	0.311333	0.871731
	NODE_1_length_1538194_cov_1083.054483_989	methyl-coenzyme M reductase subunit C	mcrC	817.233	993.239	810.318	20.1743	19.0535	19.7385
	NODE_1_length_1538194_cov_1083.054483_990	methyl-coenzyme M reductase subunit D	mcrD	1322.29	1741.23	1444.16	12.2665	10.7721	11.208
	NODE_1_length_1538194_cov_1083.054483_1316	methyl-Co(III) methanol/glycine betaine-specific corrinoid protein:coenzyme M methyltransferase	mtaA	10704.3	7983.32	11153.9	1.24533	1.6812	1.1208
	NODE_1_length_1538194_cov_1083.054483_505	methyl-Co(III) methanol/glycine betaine-specific corrinoid protein: coenzyme M methyltransferase	mtaA	925.006	1024.59	1094.13	17.6214	18.3686	14.8194
	NODE_1_length_1538194_cov_1083.054483_510	methanol corrinoid protein	mtaC	18650.4	13128.6	15834.1	0.311333	0.684932	0.747198
	NODE_1_length_1538194_cov_1083.054483_511	methanol---5-hydroxybenzimidazolylcobamide Co-methyltransferase	mtaB	17285.2	12886.8	13978.5	0.373599	0.809465	0.996264
	NODE_1_length_1538194_cov_1083.054483_968	heterodisulfide reductase subunit D	hdrD	12326.5	10406.4	15799.4	1.05853	1.05853	0.809465
	NODE_1_length_1538194_cov_1083.054483_969	glycolate dehydrogenase FAD-linked subunit	glcD	14825	14177.7	17514.9	0.622665	0.622665	0.373599
Energy conservation	NODE_1_length_1538194_cov_1083.054483_279	Energy-converting hydrogenase B, subunitA	ehbA	1265.54	1338.24	993.73	13.0137	14.01	15.9402
	NODE_1_length_1538194_cov_1083.054483_280	Energy-converting hydrogenase B, subunit B	ehbB	879.446	863.891	711.877	18.8667	21.2951	22.665
	NODE_1_length_1538194_cov_1083.054483_281	Energy-converting hydrogenase B subunit C	EhbC	867.42	892.365	799.473	19.1781	20.6725	20.3611
	NODE_1_length_1538194_cov_1083.054483_282	Energy-converting hydrogenase B, subunit D	ehbD	898.576	861.109	846.856	18.3686	21.4197	19.2403
	NODE_1_length_1538194_cov_1083.054483_283	Energy-converting hydrogenase B, subunit E	ehbE	843.349	772.901	734.801	19.7385	22.9141	21.8555
	NODE_1_length_1538194_cov_1083.054483_284	energy-converting hydrogenase B, subunit F	ehbF	564.386	468.559	569.009	26.7123	33.2503	26.2765
	NODE_1_length_1538194_cov_1083.054483_285	energy-converting hydrogenase B, subunit G	ehbG	616.287	492.558	637.658	24.9689	31.32	24.533
	NODE_1_length_1538194_cov_1083.054483_286	energy-converting hydrogenase B, subunit I/H	ehbI/ehbH	469.817	369.839	483.966	30.6974	38.6675	29.5766
	NODE_1_length_1538194_cov_1083.054483_287	energy-converting hydrogenase B, subunit J	ehbJ	285.03	249.665	260.897	40.3487	46.6999	41.9676
	NODE_1_length_1538194_cov_1083.054483_289	energy-converting hydrogenase B, subunit K	ehbK	551.853	484.814	527.595	27.1482	31.7559	27.8954
	NODE_1_length_1538194_cov_1083.054483_290	energy-converting hydrogenase B, subunit L	ehbL	585.499	519.974	602.99	25.7783	30.5106	25.4047
	NODE_1_length_1538194_cov_1083.054483_291	energy-converting hydrogenase B, subunit M	ehbM	512.763	481.568	548.449	28.7671	32.0672	26.8369
	NODE_1_length_1538194_cov_1083.054483_292	energy-converting hydrogenase B, subunit N	ehbN	611.777	493.504	631.892	25.1557	31.1955	24.5953
	NODE_1_length_1538194_cov_1083.054483_293	energy-converting hydrogenase B, subunit O	ehbO	426.219	419.255	492.961	32.7522	35.8655	29.2653
	NODE_1_length_1538194_cov_1083.054483_294	energy-converting hydrogenase B, subunit P	ehbP	982.378	1018.12	1063.18	16.3761	18.5554	15.0062
	NODE_1_length_1538194_cov_1083.054483_513	Proton-conducting membrane transporter	ehdB	219.158	276.93	202.768	46.2017	44.4583	48.132
	NODE_1_length_1538194_cov_1083.054483_514	4Fe-4S dicluster domain	ehdC	110.23	143.125	134.718	61.7061	60.274	57.5342
	NODE_1_length_1538194_cov_1083.054483_515	heterodisulfide reductase subunit C1	ehdD	107.922	183.45	108.773	62.0797	53.9228	62.391
	NODE_1_length_1538194_cov_1083.054483_516	heterodisulfide reductase subunit B2	ehdE	218.428	299.983	208.161	46.3263	43.0884	47.3225
	NODE_1_length_1538194_cov_1083.054483_517	Membrane bound hydrogenase subunit	ehdF	294.356	329.377	299.814	39.6638	40.9714	39.1656
	NODE_1_length_1538194_cov_1083.054483_518	NADH-quinone oxidoreductase subunit	ehdG	326.52	302.05	326.934	37.4844	42.8394	37.1108
	NODE_1_length_1538194_cov_1083.054483_519	4Fe-4S cluster	ehdH	341.937	353.124	356.394	36.3014	39.477	35.4919
	NODE_1_length_1538194_cov_1083.054483_520	4Fe-4S cluster	edhI	171.285	201.913	206.099	51.9303	51.9925	47.7584
	NODE_1_length_1538194_cov_1083.054483_573	NADH-quinone oxidoreductase subunit A	fpo-likeA	71.153	150.895	108.189	69.4271	58.9041	62.6401
	NODE_1_length_1538194_cov_1083.054483_574	NADH-quinone oxidoreductase subunit B	fpo-likeB	43.2858	83.7178	78.9741	78.0822	70.2989	67.8082
	NODE_1_length_1538194_cov_1083.054483_575	NADH-quinone oxidoreductase subunit C	fpo-likeC	13.2225	29.614	30.4624	87.9826	84.1843	82.5031
	NODE_1_length_1538194_cov_1083.054483_576	NADH-quinone oxidoreductase subunit D	fpo-likeD	44.0851	71.0084	68.9867	77.9577	72.7273	70.9838
	NODE_1_length_1538194_cov_1083.054483_577	NADH-quinone oxidoreductase subunit H	fpo-likeH	21.8391	35.0756	32.3348	85.056	82.1295	81.8804
	NODE_1_length_1538194_cov_1083.054483_578	NADH-quinone oxidoreductase subunit I	fpo-likeI	51.6433	58.966	67.8432	75.4047	75.8406	71.3574
	NODE_1_length_1538194_cov_1083.054483_579	NADH-quinone oxidoreductase subunit J	fpo-likeJ	47.6048	51.8406	66.3485	76.8991	77.5218	71.8555
	NODE_1_length_1538194_cov_1083.054483_581	NADH-quinone oxidoreductase subunit K	fpo-likeK	36.0799	58.3127	50.7463	80.4483	75.9651	76.1519
	NODE_1_length_1538194_cov_1083.054483_583	NADH-quinone oxidoreductase subunit L	fpo-likeL	25.8039	32.0477	39.7855	83.6862	83.3126	79.5766
	NODE_1_length_1538194_cov_1083.054483_584	NADH-quinone oxidoreductase subunit M	fpo-likeM	19.6261	30.3989	26.8535	85.8032	83.873	83.6239
	NODE_1_length_1538194_cov_1083.054483_297	V/A-type H+/Na+-transporting ATPase subunit A	ATPVA	336.38	528.752	384.791	36.7372	30.0125	34.2466
	NODE_1_length_1538194_cov_1083.054483_298	V/A-type H+/Na+-transporting ATPase subunit B	ATPVB	620.924	668.704	657.322	24.7198	25.9651	24.2217
	NODE_1_length_1538194_cov_1083.054483_303	V/A-type H+/Na+-transporting ATPase subunit C	ATPVC	148.148	228.68	155.72	55.7285	49.1283	54.1096
	NODE_1_length_1538194_cov_1083.054483_299	V/A-type H+/Na+-transporting ATPase subunit D	ATPVD	424.497	449.76	409.463	32.8767	34.2466	33.0635
	NODE_1_length_1538194_cov_1083.054483_296	V/A-type H+/Na+-transporting ATPase subunit E	ATPVE	597.909	1144.49	628.874	25.467	16.2516	24.7198
	NODE_1_length_1538194_cov_1083.054483_295	V/A-type H+/Na+-transporting ATPase subunit F	ATPVF	1177.38	1807.96	1125.4	14.1968	10.274	14.01
	NODE_1_length_1538194_cov_1083.054483_304	V/A-type H+/Na+-transporting ATPase subunit H	ATPVH	154.77	266.223	166.092	54.4209	45.0809	52.802
	NODE_1_length_1538194_cov_1083.054483_302	V/A-type H+/Na+-transporting ATPase subunit I	ATPVI	257.852	293.479	259.747	42.5903	43.3998	42.0922
	NODE_1_length_1538194_cov_1083.054483_301	V/A-type H+/Na+-transporting ATPase subunit K	ATPVK	6021.11	6119.09	5752.47	2.42839	2.30386	2.30386
Gluconeogenesis	NODE_1_length_1538194_cov_1083.054483_337	glycogen phosphorylase	glgP	135.333	149.48	123.182	57.472	59.1532	59.6513
	NODE_1_length_1538194_cov_1083.054483_250	1,4-alpha-glucan branching enzyme	glgB	48.901	47.9519	55.1394	76.5878	78.7049	74.8443
	NODE_1_length_1538194_cov_1083.054483_253	4-alpha-glucanotransferase	malQ	146.319	136.164	149.128	56.2267	60.9589	55.1059
	NODE_1_length_1538194_cov_1083.054483_251	maltose alpha-D-glucosyltransferase / alpha-amylase	treS	140.784	131.312	147.91	57.0361	62.3288	55.3549
	NODE_1_length_1538194_cov_1083.054483_1132	trehalose synthase	treT	91.1617	99.3716	102.031	65.0062	67.2478	63.6986
	NODE_1_length_1538194_cov_1083.054483_246	glucokinase	glk	75.5348	107.691	92.8352	68.0573	66.0648	64.944
	NODE_1_length_1538194_cov_1083.054483_1058	glucose-6-phosphate isomerase	pgi	583.008	638.727	592.269	25.8406	26.7746	25.5915
	NODE_1_length_1538194_cov_1083.054483_693	fructose 1,6-bisphosphate aldolase/phosphatase	fbp	902.85	926.502	877.833	18.3064	20.1121	18.68
	NODE_1_length_1538194_cov_1083.054483_1135	fructose-bisphosphate aldolase	fbaB	620.12	612.449	607.596	24.8443	27.335	25.1557
	NODE_1_length_1538194_cov_1083.054483_1056	glyceraldehyde-3-phosphate dehydrogenase	gap2	1163.72	1312.18	1361.55	14.3213	14.3213	11.7061
	NODE_1_length_1538194_cov_1083.054483_1057	phosphoglycerate kinase	pgk	1154.76	1206.68	1102.4	14.3836	15.4421	14.4458
	NODE_1_length_1538194_cov_1083.054483_726	2,3-bisphosphoglycerate-independent phosphoglycerate mutase	apgM	1639.5	1595.19	1771.99	10.5853	12.0174	9.58904
	NODE_1_length_1538194_cov_1083.054483_1206	enolase	eno	113.135	103.182	207.622	61.0834	66.7497	47.3848
	NODE_1_length_1538194_cov_1083.054483_308	pyruvate, water dikinase	pps	2912.16	2948.21	2744.67	6.16438	6.78705	6.22665
	NODE_1_length_1538194_cov_1083.054483_1032	pyruvate ferredoxin oxidoreductase alpha subunit	porA	1501.21	1317.86	1474.27	11.208	14.1345	10.9589
	NODE_1_length_1538194_cov_1083.054483_1033	pyruvate ferredoxin oxidoreductase beta subunit	porB	2735.5	2972.86	2835.62	6.60025	6.53798	6.03985
	NODE_1_length_1538194_cov_1083.054483_1030	pyruvate ferredoxin oxidoreductase gamma subunit	porC	229.358	230.842	294.56	45.33	48.9415	39.477
	NODE_1_length_1538194_cov_1083.054483_1031	pyruvate ferredoxin oxidoreductase delta subunit	porD	271.415	325.82	426.051	41.594	41.0959	32.3786
	NODE_1_length_1538194_cov_1083.054483_781	acetate-CoA ligase (ADP-forming) subunit alpha	acdA	456.355	572.125	465.759	31.32	28.4558	30.1993
	NODE_1_length_1538194_cov_1083.054483_929	acetate-CoA ligase (ADP-forming)	acdAB	46.8113	66.3426	40.507	77.2105	73.9103	79.3898
	NODE_1_length_1538194_cov_1083.054483_571	acetyl-CoA synthetase	acs	85.4786	50.6371	89.2133	65.8157	77.6463	65.5666
TCA cycle	NODE_1_length_1538194_cov_1083.054483_1096	pyruvate carboxylase subunit A	pycA	3126.83	3015.67	2881.8	5.79078	6.47572	5.97758
	NODE_1_length_1538194_cov_1083.054483_970	pyruvate carboxylase subunit B	pycB	107.498	120.096	102.1	62.2042	63.8232	63.6364
	NODE_1_length_1538194_cov_1083.054483_1559	citrate synthase	aksA	215.819	244.946	239.35	46.5753	47.0735	43.7733
	NODE_1_length_1538194_cov_1083.054483_170	citrate synthase	CS	905.887	540.747	1056.03	18.0573	29.6389	15.193
	NODE_1_length_1538194_cov_1083.054483_433	isocitrate dehydrogenase	IDH3	1140.86	1143.71	994.497	14.5081	16.3138	15.878
	NODE_1_length_1538194_cov_1083.054483_455	2-oxoglutarate/2-oxoacid ferredoxin oxidoreductase subunit alpha	korA	126.682	124.151	147.496	58.5305	63.0137	55.4172
	NODE_1_length_1538194_cov_1083.054483_454	2-oxoglutarate/2-oxoacid ferredoxin oxidoreductase subunit beta	korB	232.526	166.52	219.763	44.5828	56.2267	45.4545
	NODE_1_length_1538194_cov_1083.054483_691	Fumarate reductase flavoprotein C-term	sdhA	56.7089	65.3441	74.0789	73.9103	74.2217	69.2403
	NODE_1_length_1538194_cov_1083.054483_1075	fumarate hydratase subunit alpha	fumA	59.9953	72.7795	64.5367	72.7273	72.1669	72.1046
	NODE_1_length_1538194_cov_1083.054483_1076	fumarate hydratase subunit beta	fumB	43.1806	49.1941	40.576	78.269	78.3313	79.3275
Nucleotide salvage pathway	NODE_1_length_1538194_cov_1083.054483_186	6-phospho-3-hexuloisomerase	hxlB	434.872	445.951	414.219	32.0672	34.3088	32.8144
	NODE_1_length_1538194_cov_1083.054483_360	AMP phosphorylase	ampp	209.024	232.952	214.331	47.4471	48.5056	46.2017
	NODE_1_length_1538194_cov_1083.054483_1277	ribose 5-phosphate isomerase A	rpiA	208.247	152.809	184.912	47.6961	58.655	50.1868
	NODE_1_length_1538194_cov_1083.054483_358	ribose 1,5-bisphosphate isomerase	rpi	142.571	178.847	140.502	56.787	54.1719	56.7248
	NODE_1_length_1538194_cov_1083.054483_359	ribulose-bisphosphate carboxylase large chain	rbcL	684.496	698.693	626.962	23.4122	24.9689	24.8443
	NODE_1_length_1538194_cov_1083.054483_357	ribose-phosphate pyrophosphokinase	prsA	207.234	231.806	193.176	47.9452	48.8169	48.6301
	NODE_1_length_1538194_cov_1083.054483_1441	adenine phosphoribosyltransferase	apt	709.245	784.094	694.751	22.7273	22.6027	23.1009
	NODE_1_length_1538194_cov_1083.054483_1598	transketolase	tktA, tktB	114.666	333.051	169.075	60.8344	40.7223	52.3661
	NODE_1_length_1538194_cov_1083.054483_1599	transketolase	tktA, tktB	413.532	1092.72	462.491	33.1258	17.3101	30.3861
Amino acid biosynthesis	NODE_1_length_1538194_cov_1083.054483_259	Xaa-Pro aminopeptidase	pepP	65.5615	56.3209	66.2652	71.1083	76.5255	71.9178
	NODE_1_length_1538194_cov_1083.054483_850	aminopeptidase	pepS	755.705	739.123	817.561	21.2951	23.9726	19.6139
	NODE_1_length_1538194_cov_1083.054483_537	protease PrsW	prsW	273.671	401.953	315.036	41.4072	36.8618	37.9826
	NODE_1_length_1538194_cov_1083.054483_851	protease I	pfpI	32.8376	64.8544	38.7186	81.4446	74.4085	79.8879
	NODE_1_length_1538194_cov_1083.054483_965	membrane-bound serine protease	protease	402.271	548.654	428.988	33.6239	29.2653	31.9427
	NODE_1_length_1538194_cov_1083.054483_830	aspartate aminotransferase	aspB	135.245	143.182	141.293	57.5342	60.2117	56.6002
	NODE_1_length_1538194_cov_1083.054483_958	L-2-aminoadipate ligase	lysX	209.831	180.794	214.034	47.2603	53.9851	46.264
	NODE_1_length_1538194_cov_1083.054483_959	5-phospho-L-glutamate reductase	lysY,argC	214.4	161.164	210.636	46.8244	57.1606	46.7621
	NODE_1_length_1538194_cov_1083.054483_960	L-glutamate 6-kinase	lysZ,argB	113.212	113.405	113.453	61.0212	65.1308	61.3948
	NODE_1_length_1538194_cov_1083.054483_961	L-glutamate aminotransferase	lysJ, argD	159.985	165.236	152.38	53.4869	56.4757	54.4209
	NODE_1_length_1538194_cov_1083.054483_962	lysine/ornithine hydrolase	lysK, argE	67.625	85.2326	69.7566	70.3611	70.0498	70.5479
	NODE_1_length_1538194_cov_1083.054483_443	L-2-aminoadipate ligase	lysX	722.302	1599.5	1392.76	22.2914	11.9552	11.5193
	NODE_1_length_1538194_cov_1083.054483_444	alpha-aminoadipate	lysW	2051.25	4713.65	3601.08	8.96638	3.61146	4.79452
	NODE_1_length_1538194_cov_1083.054483_434	aspartate kinase	lysC	519.912	567.571	535.402	28.6426	28.6426	27.7086
	NODE_1_length_1538194_cov_1083.054483_161	phosphoglucosamine mutase	glmM	529.044	507.686	473.104	28.1445	30.8219	30.0747
	NODE_1_length_1538194_cov_1083.054483_900	ketol-acid reductoisomerase	ilvC	946.679	812.974	806.578	17.2478	22.1669	19.9875
	NODE_1_length_1538194_cov_1083.054483_902	acetolactate synthase I/III small subunit	ilvH, ilvN	1.66842	1.02642	0	91.1582	91.1582	91.5318
	NODE_1_length_1538194_cov_1083.054483_903	acetolactate synthase I/II/III large subunit	ilvB, ilvG, ilvI	706.288	805.725	751.715	22.8518	22.2291	21.5442
	NODE_1_length_1538194_cov_1083.054483_696	dihydroxy-acid dehydratase	ilvD	167.276	120.539	162.881	52.4907	63.6986	53.3001
	NODE_1_length_1538194_cov_1083.054483_625	phosphoribosylformimino-5-aminoimidazole carboxamide ribotide isomeras	hisA	19.5068	14.2577	20.071	85.8655	87.7958	85.1806
	NODE_1_length_1538194_cov_1083.054483_627	imidazoleglycerol-phosphate dehydratase	hisB	17.7759	7.73735	20.0439	86.4882	89.6638	85.3051
	NODE_1_length_1538194_cov_1083.054483_628	histidinol-phosphate aminotransferase	hisC	29.2226	16.473	36.8328	82.8144	87.4222	80.3861
	NODE_1_length_1538194_cov_1083.054483_629	histidinol dehydrogenase	hisD	383.407	135.44	323.278	34.6202	61.0834	37.4844
	NODE_1_length_1538194_cov_1083.054483_623	phosphoribosyl-AMP cyclohydrolase / phosphoribosyl-ATP pyrophosphohydrolase	hisIE	62.0831	58.7117	69.4438	72.1046	75.9029	70.7347
	NODE_1_length_1538194_cov_1083.054483_624	imidazole glycerol-phosphate synthase subunit HisF	hisF	24.8358	20.9892	32.7358	84.2466	86.3014	81.5068
	NODE_1_length_1538194_cov_1083.054483_626	imidazole glycerol-phosphate synthase subunit HisH	hisH	71.3252	36.64	74.4453	69.3649	81.6314	69.1781
	NODE_1_length_1538194_cov_1083.054483_631	ATP phosphoribosyltransferase regulatory subunit	hisZ	113.667	35.7003	135.634	60.8966	81.7559	57.2852
	NODE_1_length_1538194_cov_1083.054483_912	aldehyde:ferredoxin oxidoreductase	aor	600.964	445.33	659.466	25.4047	34.3711	24.1594
	NODE_1_length_1538194_cov_1083.054483_1134	aldehyde:ferredoxin oxidoreductase	aor	57.2799	73.5785	75.3782	73.7235	72.0423	68.6177
	NODE_1_length_1538194_cov_1083.054483_1077	aldehyde:ferredoxin oxidoreductase	aor	748.415	791.93	714.054	21.4819	22.4782	22.4782
	NODE_1_length_1538194_cov_1083.054483_1045	indolepyruvate ferredoxin oxidoreductase, alpha subunit	iorA	315.874	421.546	303.156	38.2316	35.741	38.8543
	NODE_1_length_1538194_cov_1083.054483_1044	indolepyruvate ferredoxin oxidoreductase, beta subunit	iorB	137.386	220.539	146.345	57.2852	49.6887	55.5417
	NODE_1_length_1538194_cov_1083.054483_455	2-oxoglutarate/2-oxoacid ferredoxin oxidoreductase subunit alpha	korA	126.682	124.151	147.496	58.5305	63.0137	55.4172
	NODE_1_length_1538194_cov_1083.054483_454	2-oxoglutarate/2-oxoacid ferredoxin oxidoreductase subunit beta	korB	232.526	166.52	219.763	44.5828	56.2267	45.4545
	NODE_1_length_1538194_cov_1083.054483_1385	glutamine synthetase	gln	502.027	315.074	455.784	29.1407	42.0299	30.6974
Urea cycle	NODE_1_length_1538194_cov_1083.054483_1603	carbamoyl-phosphate synthase small subunit	carA	8.8984	11.0822	9.80836	88.9788	88.792	87.6712
	NODE_1_length_1538194_cov_1083.054483_1602	carbamoyl-phosphate synthase large subunit	carB	49.8574	71.1342	45.5328	75.9029	72.6027	77.8331
	NODE_1_length_1538194_cov_1083.054483_1355	argininosuccinate lyase	argH	186.095	174.759	156.676	50.2491	54.7945	54.0473
	NODE_1_length_1538194_cov_1083.054483_1356	argininosuccinate synthase	argG	285.203	311.868	312.842	40.2864	42.279	38.0448
	NODE_1_length_1538194_cov_1083.054483_204	ornithine carbamoyltransferase	argF, argI	918.651	1354.61	901.659	17.6837	13.7609	18.2441

## Sheet: Supplementary Table 3
Supplementary Table 3. General information on the 23 Verstraetearchaeales genomes obtained in our study.
Cluster	Genome ID	Temperature (ºC)	Quality	Completeness (%)	Contamination (%)	Genome size (Mbp)	No. of scaffolds	DNA G+C content (%)	No. of ORFs	No. of mcrA/mcrA-like copies	No. of 16S rRNA gene copies	No. of 23S rRNA gene copies	No. of 5s rRNA gene copies	No. of tRNA genes	Quality score (completeness – 4×contamination)$
Verstraetearcheum methanopetracarbonis (Cluster 1)	LWZ-6#	55	High	100	0	1.54	1	54.42	1646	1	1	1	1	45	100
Ca. Verstraetearcheum methanopetracarbonis (Cluster 1)	XY_C20_T55_P1_bin.108	55	High	94.39	0	1.03	14	54.83	1152	1	1	1	1	39	94.39
Ca. Verstraetearcheum methanopetracarbonis (Cluster 1)	XY_C20_T55_P2_bin.18	55	High	90.65	0	1.3	40	54.51	1408	1	1	1	n.d.	32	90.65
Ca. Verstraetearcheum methanopetracarbonis (Cluster 1)	XY_C16_T55_B1_bin.3	55	High	93.46	0	1.28	56	54.84	1413	1	1	1	1	40	93.46
Ca. Verstraetearcheum methanopetracarbonis (Cluster 1)	XY_C16_T55_CK_bin.13	55	Medium	88.47	0.31	1.21	99	55.15	1397	1	n.d.	n.d.	n.d.	34	87.23
Ca. Verstraetearcheum methanopetracarbonis (Cluster 1)	XY_C20_T55_P3_bin.45	55	High	95.33	0	1.14	52	54.83	1279	1	1	1	1	41	95.33
Ca. Verstraetearcheum methanopetracarbonis (Cluster 1)	GD_Cm_T35_P1_bin.81	35	High	92.63	1.25	1.22	49	55.59	1346	1	n.d.	n.d.	n.d.	30	87.63
Ca. Verstraetearcheum methanopetracarbonis (Cluster 1)	GD_Cm_T35_P2_bin.12	35	High	92.52	0	0.95	52	56.37	1067	1	n.d.	n.d.	n.d.	32	92.52
Ca. Verstraetearcheum methanopetracarbonis (Cluster 1)	GD_Cm_T35_P3_bin.24	35	High	93.93	0.69	1.23	125	55.74	1421	1	n.d.	n.d.	n.d.	28	91.17
Ca. Verstraetearcheum methanopetracarbonis (Cluster 1)	GD_Cm_T35_P0_bin.43	35	High	97.2	0	1.5	2	54.61	1597	1	n.d.	n.d.	n.d.	37	97.2
Ca. Verstraetearcheum methanopetracarbonis (Cluster 1)	HX_O_T65_bin.2	65	High	100	0	1.47	3	54.35	1568	1	1	1	1	44	100
Ca. Verstraetearcheum methanopetracarbonis (Cluster 1)	HX_Cm_T55_B3_bin.47	55	High	90.73	0	1.03	89	54.33	1225	1	n.d.	n.d.	n.d.	38	90.73
Ca. Verstraetearcheum methanopetracarbonis (Cluster 1)	XY_O_T55_M2_bin.40	55	High	99.07	1.87	1.75	169	54.65	2038	1	1	1	1	50	91.59
Ca. Verstraetearcheum methanopetracarbonis (Cluster 1)	SK_C16_T55_P0_bin.9	55	High	99.07	0	1.47	26	54.61	1573	1	1	1	1	47	99.07
Ca. Verstraetearcheum methanopetracarbonis (Cluster 1)	SK_C16_T55_P1_bin.23	55	High	98.13	0.93	1.64	175	54.29	1853	1	1	1	1	46	94.41
Ca. Verstraetearcheum methanopetracarbonis (Cluster 1)	SK_C16_T55_P2_bin.6	55	High	99.07	0	1.55	50	54.51	1688	1	1	1	1	44	99.07
Ca. Verstraetearcheum methanopetracarbonis (Cluster 1)	SK_C16_T55_P3_bin.44	55	High	100	0	1.51	16	54.54	1621	1	1	1	1	47	100
Ca. Verstraetearcheum methanopetracarbonis (Cluster 1)	XY_O_T55_M1_bin.33	55	High	95.33	0	1.29	63	54.81	1429	1	1	1	1	46	95.33
Ca. Verstraetearcheum thermotaenarum (Cluster 2)	XY_C20_T55_P1_bin.49#	55	Medium	88.21	0	1.09	75	54.64	1277	1	n.d.	n.d.	n.d.	19	88.21
Ca. Verstraetearcheum thermotaenarum (Cluster 2)	XY_C20_T55_P2_bin.121	55	Medium	83.54	0	0.92	71	55.14	1091	0	n.d.	n.d.	n.d.	20	83.54
Ca. Verstraetearcheum mesootaenarum (Cluster 3)	GD_Cm_T35_P0_bin.90#	35	High	95.33	0	1.46	14	53.47	1602	1	n.d.	n.d.	n.d.	37	95.33
Ca. Luimethanimicrobium subterraneum (Cluster 4)	GD_Cm_T35_P0_bin.15#	35	Medium	81.31	0.93	1.49	8	58.76	1567	2	n.d.	n.d.	n.d.	30	77.59
Ca. Methanostamsia subterranea (Cluster 5)	XY_C20_T55_P2_bin.56#	55	High	91.12	0.93	1.4	305	47	1805	1	1*	n.d.	n.d.	44	87.4
Notes:	names of MAGs: sub-location (XY) of oily sludge sources plus substrates (C16) plus temperature (55) used plus MAGs (bin) number.
	# name of representative MAGs (also type sequences) are shown in bold
	n.d., not detected;
	*, 16S rRNA of cluster5 were partial;
	$, according to Chuvochina et al., Syst. Appl. Microbiol. 42 (2019) 15–21

## Sheet: Supplementary Table 4
Supplementary Table 4. Methanogenetic features and energy mechanism of 5 Verstraetearchaeales clusters in our study, other Verstraetearchaeales, Ca. Nezhaarchaeales and Ca. Culexarchaeales genomes and other hydrogen-dependent methylotrophic methanogens in Euryarchaeota. 1: Present, 0: Absent.
					Verstraetearchaeia																																												Euryarchaeota
					Verstraetearchaeales																									Ca. Aukarchaeales		Ca. Nezhaarchaeales								Ca. Culexarchaeales (9)									Euryarchaeota
					Verstraetearchaeum methanopetracarbonis LWZ-6	Ca. Methanosuratincola yellowstonensis LCB70	Ca. Verstraetearcheum thermotaenarum	Ca. Verstraetearchaeum mesotaenarum	Ca. Luimethanimicrobium subterraneum	Ca. Methanostamsia subterranea	Verstraetearchaeales (19)																			Ca. Aukarchaeales		Ca. Nezhaarchaeales (8)								Ca. Culexarchaeales (9)									Methanosphaera stadtmanae DSM 3091T
Pathway		Gene	KO	Function	LWZ-6	LCB70	XY_C20_T55_P1_bin.49 (Cluster 2)	GD_Cm_T35_P0_bin.90 (Cluster 3)	GD_Cm_T35_P0_bin.15 (Cluster 4)	XY_C20_T55_P2_bin.56 (Cluster 5)	GCA_004348015.1	GCA_020832905.1	GCA_024461155.1	Ga0263253	GCA_025057955.1	GCA_004347955.1	GCA_011605805.1	GCA_014361445.1	Ga0263254	Ga0263249	GCA_001717015.1	GCA_004028775.1	GCA_014361455.1	GCA_014361425.1	GCA_024464205.1	GCA_001717025.1	GCA_001717035.1	GCA_015660995.1	GCA_016882195.1	GCA_003649095.1	GCA_021160575.1	GCA_003649615.1	GCA_003650865.1	GCA_003649565.1	GCA_011364685.1	GCA_011369775.1	GCA_020833355.1	GCA_025059375.1	Ga0180368	GCA_011372955.1	GCA_020833005.1	GCA_021158885.1	GCA_025061095.1	GCA_025061115.1	GCA_025061245.1	Ga0181710	GCA_024707015.1	GCA_003649185.1	GCA_000012545.1
Methanogenesis	Methanogenesis	mcrA or mcrA-like	K00399	methyl-coenzyme M reductase alpha subunit	1	1	1	1	1	1	1	1	1	1	1	1	1	1	1	1	1	1	1	1	1	1	1	1	1	0	1	0	0	1	0	1	0	1	1	0	0	0	0	0	0	0	0	0	1
		mcrB or mcrB-like	K00401	methyl-coenzyme M reductase beta subunit	1	1	1	1	1	1	1	1	1	1	1	1	1	1	1	1	1	1	1	1	1	1	1	1	1	0	1	0	0	1	0	1	0	1	1	0	0	0	0	0	0	0	0	0	1
		mcrG or mcrG-like	K00402	methyl-coenzyme M reductase gamma subunit	1	1	1	1	1	1	1	1	1	1	1	1	1	1	1	1	1	1	1	1	1	1	1	1	1	0	1	0	0	0	0	1	0	1	1	0	0	0	0	0	0	0	0	0	1
		mcrC	K03421	methyl-coenzyme M reductase subunit C	1	1	1	1	1	1	1	1	1	1	1	1	1	1	1	1	1	1	1	1	1	1	1	1	1	0	1	0	1	1	0	1	0	1	1	0	0	0	0	0	0	0	0	0	1
		mcrD	K03422	methyl-coenzyme M reductase subunit D	1	1	1	1	0	0	1	1	1	1	1	1	1	1	0	0	1	0	1	1	0	0	0	0	0	0	1	0	0	1	0	1	0	1	1	0	0	0	0	0	0	0	0	0	1
	Methylotrophic	mtaA	K14080	[methyl-Co(III) methanol-specific corrinoid protein]:coenzyme M methyltransferase	1	1	1	1	1	1	1	1	1	1	1	1	1	1	1	1	1	1	1	1	1	1	1	1	1	1	1	0	0	0	0	0	0	0	0	0	0	0	0	0	0	0	0	0	1
		mtaB	K04480	methanol-5-hydroxybenzimidazolylcobamide Co-methyltransferase	1	1	0	1	1	0	0	0	0	0	0	0	0	0	0	0	0	1	1	1	0	0	0	1	0	0	0	0	0	0	0	0	0	0	0	0	0	0	0	0	0	0	0	0	1
		mtaC	K14081	methanol corrinoid protein	1	1	0	1	1	0	0	0	0	0	0	0	0	0	0	0	0	1	1	1	0	0	0	1	0	0	0	0	0	0	0	0	0	0	0	0	0	0	0	0	0	0	0	0	1
		mtbA	K14082	[methyl-Co(III) methylamine-specific corrinoid protein]:coenzyme M methyltransferase	0	0	0	1	1	0	1	1	1	1	1	0	0	0	0	0	0	0	1	0	0	1	0	0	0	0	1	0	0	0	0	0	0	0	0	0	0	0	0	0	0	0	0	0	0
		mtmC	K16177	monomethylamine corrinoid protein	0	0	0	0	0	0	0	0	0	0	0	0	0	0	0	0	0	0	0	0	0	0	0	0	0	0	0	0	0	0	0	0	0	0	0	0	0	0	0	0	0	0	0	0	0
		mtmB	K16176	methylamine---corrinoid protein Co-methyltransferase	1	1	1	1	0	1	1	1	1	1	1	0	1	1	1	1	1	1	1	1	1	0	0	1	1	0	0	0	0	0	0	0	0	0	0	0	0	0	0	0	0	0	0	0	0
		mtbC	K16179	dimethylamine corrinoid protein	1	1	1	1	0	1	0	0	0	1	0	1	1	1	1	1	1	1	1	1	0	0	1	1	1	0	0	0	0	0	0	1	0	1	1	0	0	0	0	0	0	0	0	0	0
		mtbB	K16178	dimethylamine---corrinoid protein Co-methyltransferase	0	0	0	0	0	0	0	0	0	0	0	0	0	0	0	0	0	0	0	0	0	0	0	0	0	0	0	0	0	0	0	0	0	0	0	0	0	0	0	0	0	0	0	0	0
		mttC	K14084	trimethylamine corrinoid protein	1	1	1	1	0	1	1	1	1	1	1	1	1	1	0	0	1	1	1	1	1	0	1	1	0	0	0	0	0	0	0	0	0	0	0	0	0	0	0	0	0	0	0	0	0
		mttB	K14083	trimethylamine---corrinoid protein Co-methyltransferase	0	0	0	0	0	0	0	0	0	0	0	0	0	0	0	0	0	0	0	0	0	0	0	0	0	0	0	0	0	0	0	0	0	0	0	1	1	0	0	0	0	1	1	0	0
	Hydrogenotrophic	fwdA, fmdA	K00200	formylmethanofuran dehydrogenase subunit A	0	0	0	0	0	0	0	0	0	0	0	0	0	0	0	0	0	0	0	0	0	0	0	0	0	1	0	1	1	1	1	1	1	1	1	1	1	0	0	1	1	1	0	0	1
		fwdB, fmdB	K00201	formylmethanofuran dehydrogenase subunit B	0	0	0	0	0	0	0	0	0	0	0	0	0	0	0	0	0	0	0	0	0	0	0	0	0	1	0	1	1	0	1	1	1	1	1	1	1	0	0	1	1	1	0	0	1
		fwdC, fmdC	K00202	formylmethanofuran dehydrogenase subunit C	0	0	0	0	0	0	0	0	0	0	0	0	0	0	0	0	0	0	0	0	0	0	0	0	0	1	0	1	1	1	1	1	1	1	1	1	1	0	0	1	0	1	0	0	1
		fwdD, fmdD	K00203	formylmethanofuran dehydrogenase subunit D	0	0	0	0	0	0	0	0	0	0	0	0	0	0	0	0	0	0	0	0	0	0	0	0	0	0	0	0	0	1	0	0	0	0	0	0	0	0	0	0	0	0	0	0	1
		fwdE, fmdE	K11261	formylmethanofuran dehydrogenase subunit E	0	0	0	0	0	0	0	0	0	0	0	0	0	0	0	0	0	0	0	0	0	0	0	0	0	0	0	0	0	0	0	1	1	1	1	1	1	1	1	1	1	0	0	1	0
		fwdH	K00204	4Fe-4S ferredoxin	0	0	0	0	0	0	0	0	0	0	0	0	0	0	0	0	0	0	0	0	0	0	0	0	0	0	0	0	0	0	0	0	0	0	0	0	0	0	0	0	0	0	0	0	0
		fwdF, fmdF	K00205	4Fe-4S ferredoxin	0	0	0	0	0	0	0	0	0	0	0	0	0	0	0	0	0	0	0	0	0	0	0	0	0	0	0	1	1	1	1	1	1	1	1	0	0	0	0	0	1	0	0	0	0
		fwdG	K11260	4Fe-4S ferredoxin	0	0	0	0	0	0	0	0	0	0	0	0	0	0	0	0	0	0	0	0	0	0	0	0	0	0	0	1	1	0	0	1	1	1	1	0	0	0	0	0	1	0	0	0	0
		ftr	K00672	formylmethanofuran--tetrahydromethanopterin N-formyltransferase	0	0	0	0	0	0	0	0	0	0	0	0	0	0	0	0	0	0	0	0	0	0	0	0	0	1	0	1	1	1	1	1	1	1	1	1	1	0	0	1	1	1	0	0	1
		mch	K01499	methenyltetrahydromethanopterin cyclohydrolase	0	0	0	0	0	0	0	0	0	0	0	0	0	0	0	0	0	0	0	0	0	0	0	0	0	0	0	1	1	1	0	1	1	1	1	1	1	0	0	1	0	1	0	0	1
		mtd	K00319	methylenetetrahydromethanopterin dehydrogenase	0	0	0	0	0	0	0	0	0	0	0	0	0	0	0	0	0	0	0	0	0	0	0	0	0	0	0	1	1	1	1	1	1	1	1	1	1	1	1	1	1	1	1	1	1
		hmd	K13942	5,10-methenyltetrahydromethanopterin hydrogenase	0	0	0	0	0	0	0	0	0	0	0	0	0	0	0	0	0	0	0	0	0	0	0	0	0	0	0	0	0	0	0	0	0	0	0	0	0	0	0	0	0	0	0	0	0
		mer	K00320	5,10-methylenetetrahydromethanopterin reductase	0	0	0	0	0	0	0	0	0	0	0	0	0	0	0	0	0	0	0	0	0	0	0	0	0	0	0	1	1	1	1	1	1	1	1	1	1	1	0	0	1	1	0	0	1
		mtrA	K00577	tetrahydromethanopterin S-methyltransferase subunit A	0	0	0	0	0	0	0	0	0	0	0	0	0	0	0	0	0	0	0	0	0	0	0	0	0	1	0	0	1	1	1	1	1	1	1	0	0	0	0	0	0	0	0	0	1
		mtrB	K00578	tetrahydromethanopterin S-methyltransferase subunit B	0	0	0	0	0	0	0	0	0	0	0	0	0	0	0	0	0	0	0	0	0	0	0	0	0	0	0	0	1	0	0	1	0	1	1	0	0	0	0	0	0	0	0	0	1
		mtrC	K00579	tetrahydromethanopterin S-methyltransferase subunit C	0	0	0	0	0	0	0	0	0	0	0	0	0	0	0	0	0	0	0	0	0	0	0	0	0	1	0	0	1	0	0	1	0	1	1	0	0	0	0	0	0	0	0	0	1
		mtrD	K00580	tetrahydromethanopterin S-methyltransferase subunit D	0	0	0	0	0	0	0	0	0	0	0	0	0	0	0	0	0	0	0	0	0	0	0	0	0	1	0	0	1	0	0	1	0	1	1	0	0	0	0	0	0	0	0	0	1
		mtrE	K00581	tetrahydromethanopterin S-methyltransferase subunit E	0	0	0	0	0	0	0	0	0	0	0	0	0	0	0	0	0	0	0	0	0	0	0	0	0	1	0	0	1	0	0	1	0	1	1	0	0	0	0	0	0	0	0	0	1
		mtrF	K00582	tetrahydromethanopterin S-methyltransferase subunit F	0	0	0	0	0	0	0	0	0	0	0	0	0	0	0	0	0	0	0	0	0	0	0	0	0	0	0	0	0	0	0	0	0	0	0	0	0	0	0	0	0	0	0	0	1
		mtrG	K00583	tetrahydromethanopterin S-methyltransferase subunit G	0	0	0	0	0	0	0	0	0	0	0	0	0	0	0	0	0	0	0	0	0	0	0	0	0	0	0	0	0	0	0	0	0	0	0	0	0	0	0	0	0	0	0	0	1
		mtrH	K00584	tetrahydromethanopterin S-methyltransferase subunit H	1	1	1	1	1	1	1	1	1	1	1	1	1	1	1	1	1	1	1	1	1	1	1	1	1	1	1	0	1	1	1	1	1	1	1	1	1	0	0	1	0	1	0	0	1
	Acetoclastic	ACSS1_2, acs	K01895	acetyl-CoA synthetase	1	1	1	1	0	1	1	1	1	1	1	1	1	1	1	1	1	1	1	1	0	0	0	1	1	0	1	1	0	1	0	0	0	0	0	0	0	0	0	0	0	0	0	0	1
		ackA	K00925	acetate kinase	0	0	0	0	0	0	0	0	0	0	0	0	0	0	0	0	0	0	0	0	0	0	0	0	0	0	0	0	0	0	0	0	0	0	0	0	0	0	0	0	0	0	0	0	0
		E2.3.1.8, pta	K00625	phosphate acetyltransferase	0	0	0	0	0	0	0	0	0	0	0	0	0	0	0	0	0	0	0	0	0	0	0	0	0	0	0	0	0	0	0	0	0	0	0	0	0	0	0	0	0	0	0	0	0
		cooS	K00198	anaerobic carbon-monoxide dehydrogenase catalytic subunit	1	1	1	1	0	1	0	0	0	1	0	1	1	1	1	1	1	1	1	1	1	1	1	0	1	0	0	0	0	0	0	0	0	0	0	0	0	0	0	0	0	0	0	0	0
		cooF	K00196	anaerobic carbon-monoxide dehydrogenase iron sulfur subunit	0	0	0	0	0	0	0	0	0	0	0	0	0	0	0	0	0	0	0	0	0	0	0	0	0	0	0	0	0	1	0	1	1	1	1	0	0	0	0	0	0	0	0	0	0
		chdA	K00192	anaerobic carbon-monoxide dehydrogenase, CODH/ACS complex subunit alpha	0	0	0	0	0	0	0	0	0	0	0	0	0	0	0	0	0	0	0	0	0	0	0	0	0	1	0	1	0	0	1	1	0	1	1	1	1	0	0	0	1	1	0	0	0
		cdhB	K00195	anaerobic carbon-monoxide dehydrogenase, CODH/ACS complex subunit epsilon	0	0	0	0	0	0	0	0	0	0	0	0	0	0	0	0	0	0	0	0	0	0	0	0	0	1	0	1	0	0	1	1	1	1	1	1	1	0	0	0	1	1	0	0	0
		cdhC	K00193	acetyl-CoA decarbonylase/synthase, CODH/ACS complex subunit beta	0	0	0	0	0	0	0	0	0	0	0	0	0	0	0	0	0	0	0	0	0	0	0	0	0	1	0	1	0	0	1	1	1	1	1	1	1	0	0	0	1	1	0	0	0
		cdhE, acsC	K00197	acetyl-CoA decarbonylase/synthase, CODH/ACS complex subunit gamma	0	0	0	0	0	0	0	0	0	0	0	0	0	0	0	0	0	0	0	0	0	0	0	0	0	1	0	1	0	0	1	1	1	1	1	1	1	0	0	0	1	1	0	0	0
		cdhD, acsD	K00194	acetyl-CoA decarbonylase/synthase, CODH/ACS complex subunit delta	0	0	0	0	0	0	0	0	0	0	0	0	0	0	0	0	0	0	0	0	0	0	0	0	0	1	0	1	0	0	1	1	1	1	1	1	1	0	0	0	1	1	0	0	0
		mtrA	K00577	tetrahydromethanopterin S-methyltransferase subunit A	0	0	0	0	0	0	0	0	0	0	0	0	0	0	0	0	0	0	0	0	0	0	0	0	0	1	0	0	1	1	1	1	1	1	1	0	0	0	0	0	0	0	0	0	1
		mtrB	K00578	tetrahydromethanopterin S-methyltransferase subunit B	0	0	0	0	0	0	0	0	0	0	0	0	0	0	0	0	0	0	0	0	0	0	0	0	0	0	0	0	1	0	0	1	0	1	1	0	0	0	0	0	0	0	0	0	1
		mtrC	K00579	tetrahydromethanopterin S-methyltransferase subunit C	0	0	0	0	0	0	0	0	0	0	0	0	0	0	0	0	0	0	0	0	0	0	0	0	0	1	0	0	1	0	0	1	0	1	1	0	0	0	0	0	0	0	0	0	1
		mtrD	K00580	tetrahydromethanopterin S-methyltransferase subunit D	0	0	0	0	0	0	0	0	0	0	0	0	0	0	0	0	0	0	0	0	0	0	0	0	0	1	0	0	1	0	0	1	0	1	1	0	0	0	0	0	0	0	0	0	1
		mtrE	K00581	tetrahydromethanopterin S-methyltransferase subunit E	0	0	0	0	0	0	0	0	0	0	0	0	0	0	0	0	0	0	0	0	0	0	0	0	0	1	0	0	1	0	0	1	0	1	1	0	0	0	0	0	0	0	0	0	1
		mtrF	K00582	tetrahydromethanopterin S-methyltransferase subunit F	0	0	0	0	0	0	0	0	0	0	0	0	0	0	0	0	0	0	0	0	0	0	0	0	0	0	0	0	0	0	0	0	0	0	0	0	0	0	0	0	0	0	0	0	1
		mtrG	K00583	tetrahydromethanopterin S-methyltransferase subunit G	0	0	0	0	0	0	0	0	0	0	0	0	0	0	0	0	0	0	0	0	0	0	0	0	0	0	0	0	0	0	0	0	0	0	0	0	0	0	0	0	0	0	0	0	1
		mtrH	K00584	tetrahydromethanopterin S-methyltransferase subunit H	1	1	1	1	1	1	1	1	1	1	1	1	1	1	1	1	1	1	1	1	1	1	1	1	1	1	1	0	1	1	1	1	1	1	1	1	1	0	0	1	0	1	0	0	1
Electron cycling and energy conservation		hdrA2	K03388	heterodisulfide reductase subunit A2	0	0	0	0	0	0	0	0	0	0	0	0	0	0	0	0	0	0	0	0	0	0	0	0	0	1	0	1	1	1	1	1	1	1	1	1	1	0	1	1	1	1	1	1	1
		hdrB2	K03389	heterodisulfide reductase subunit B2	1	1	0	1	1	0	1	1	1	1	0	0	0	0	1	0	1	1	1	1	1	1	1	1	1	1	1	1	1	1	1	1	1	1	1	1	1	0	1	1	1	1	1	1	1
		hdrC2	K03390	heterodisulfide reductase subunit C2	1	1	0	1	1	0	1	1	1	1	0	0	0	0	0	0	1	1	1	1	0	0	0	1	1	1	1	1	1	1	0	1	1	1	1	1	1	0	1	1	1	1	1	1	1
		hdrD	K08264	heterodisulfide reductase subunit D	1	1	1	1	1	1	1	1	1	1	1	1	1	1	1	1	1	1	1	1	0	1	1	1	0	1	1	1	1	1	1	1	0	1	1	0	0	0	0	0	0	0	0	0	0
		hdrE	K08265	heterodisulfide reductase subunit E	0	0	0	0	0	0	0	0	0	0	0	0	0	0	0	0	0	0	0	0	0	0	0	0	0	0	0	0	0	0	0	0	0	0	0	0	0	0	0	0	0	0	0	0	0
		glcD	K00104	glycolate oxidase [EC:1.1.3.15]	1	1	0	1	1	1	1	1	1	1	1	1	1	1	1	1	1	1	1	1	1	1	1	1	0	1	1	1	1	1	1	1	1	1	1	1	1	1	1	1	1	1	1	1	0
		lldG	K00782	L-lactate dehydrogenase complex protein LldG	1	1	1	1	1	0	1	1	1	1	1	1	1	1	0	1	0	1	1	1	1	1	1	1	1	1	1	1	1	0	1	1	0	1	1	0	0	0	0	0	0	0	0	0	0
		hydA	K17993/COG3259	sulfhydrogenase subunit alpha	0	0	0	0	0	0	0	0	0	0	0	0	0	0	0	0	0	0	0	0	1	0	0	1	0	0	1	0	1	0	0	1	1	1	1	0	0	0	0	0	0	0	0	0	0
		hydD	K17994/COG1941	sulfhydrogenase subunit delta	1	0	0	1	0	0	0	0	0	0	0	0	0	0	0	0	0	1	0	1	0	0	0	1	0	0	0	0	1	1	0	1	1	1	1	1	1	0	0	0	1	1	1	0	0
		hydG	K17995/COG0543	sulfhydrogenase subunit gamma (sulfur reductase)	0	0	0	0	0	0	0	0	0	0	0	0	0	0	0	0	0	0	0	0	0	0	1	1	0	0	0	0	0	0	0	0	0	0	0	0	0	0	0	1	0	0	0	0	0
		hydB	K17996/COG1145	sulfhydrogenase subunit beta (sulfur reductase)	0	0	0	0	1	1	0	0	0	0	0	1	1	1	1	1	1	0	0	1	0	0	0	1	1	0	0	0	1	1	0	1	1	1	1	0	0	0	0	0	0	0	0	0	0
		mvhA	K14126/COG3259	F420-non-reducing hydrogenase large subunit	0	0	0	0	0	0	0	0	0	0	0	0	0	0	0	0	0	0	0	0	0	0	0	0	0	1	0	0	1	0	0	1	1	1	1	1	0	0	0	1	0	0	1	0	1
		mvhD	K14127/COG1908	F420-non-reducing hydrogenase iron-sulfur subunit	0	0	0	0	0	0	0	0	0	0	0	0	0	0	0	0	0	0	0	0	0	0	0	0	0	1	0	0	0	0	0	0	0	0	0	1	1	1	1	1	1	1	1	1	1
		mvhG	K14128/COG1941	F420-non-reducing hydrogenase small subunit	0	0	0	0	0	0	0	0	0	0	0	0	0	0	0	0	0	0	0	0	0	0	0	0	0	1	0	0	0	0	0	0	0	0	0	1	1	1	1	1	1	1	1	1	1
		nuoA	K00330	NADH-quinone oxidoreductase subunit A	0	0	0	0	0	0	0	0	0	0	0	0	0	0	0	0	0	0	0	0	0	0	0	0	0	0	0	0	0	0	0	0	0	0	0	0	0	0	0	0	0	0	0	0	0
		nuoB	K00331	NADH-quinone oxidoreductase subunit B	1	1	0	1	1	0	0	0	0	0	0	0	0	0	0	0	1	1	1	1	0	1	1	1	0	1	0	1	0	0	1	1	1	0	1	0	0	0	1	0	0	0	0	1	0
		nuoC	K00332	NADH-quinone oxidoreductase subunit C	1	1	1	0	0	0	0	0	0	0	0	0	0	0	0	0	1	1	0	1	0	1	1	0	0	1	1	1	0	0	1	1	1	1	1	1	1	1	1	1	0	1	0	1	0
		nuoCD	K13378	NADH-quinone oxidoreductase subunit C/D	0	0	0	0	0	0	0	0	0	0	0	0	0	0	0	0	0	0	0	0	0	1	1	0	0	1	0	1	0	0	1	1	1	0	1	0	0	0	0	0	0	0	0	0	0
		nuoD	K00333	NADH-quinone oxidoreductase subunit D	1	1	1	0	1	1	1	1	1	1	1	1	1	1	1	1	1	1	0	1	1	1	1	1	0	1	1	1	0	0	1	1	1	1	1	1	1	0	0	1	1	1	1	0	0
		nuoE	K00334	NADH-quinone oxidoreductase subunit E	0	0	0	0	0	0	0	0	0	0	0	0	0	0	0	0	0	0	0	0	0	0	0	0	0	0	0	0	0	0	0	0	0	0	0	0	0	0	0	0	0	0	0	0	0
		nuoF	K00335	NADH-quinone oxidoreductase subunit F	0	0	0	0	0	0	0	0	0	0	0	0	0	0	0	0	0	0	0	0	0	0	0	0	0	0	0	0	0	0	0	0	0	0	0	0	0	0	0	0	0	0	0	0	0
		nuoG	K00336	NADH-quinone oxidoreductase subunit G	0	0	0	0	0	0	0	0	0	0	0	0	0	0	0	0	0	0	0	0	0	0	0	0	0	0	0	0	0	0	0	0	0	0	0	0	0	0	0	0	0	0	0	0	0
		nuoH	K00337	NADH-quinone oxidoreductase subunit H	0	0	0	0	1	1	1	1	1	1	1	1	1	1	1	1	0	0	0	0	1	1	1	1	1	1	1	1	0	1	1	1	1	1	1	1	1	1	1	1	1	1	1	1	0
		nuoI	K00338	NADH-quinone oxidoreductase subunit I	0	0	0	0	0	0	0	0	0	0	1	0	0	0	0	0	0	0	0	0	0	0	1	0	0	0	0	1	0	1	0	1	0	1	1	1	0	1	1	0	1	0	0	1	0
		nuoJ	K00339	NADH-quinone oxidoreductase subunit J	0	0	0	0	0	0	0	0	0	0	0	0	0	0	0	0	0	0	0	0	0	0	0	0	0	0	0	0	0	0	0	0	0	0	0	0	0	0	0	0	0	0	0	0	0
		nuoK	K00340	NADH-quinone oxidoreductase subunit K	0	0	0	0	1	0	0	0	0	1	1	0	0	0	0	0	0	0	0	0	1	0	1	0	0	1	0	0	0	0	0	0	0	0	0	0	0	0	0	1	1	0	0	0	0
		nuoL	K00341	NADH-quinone oxidoreductase subunit L	1	1	1	1	1	1	1	1	1	1	1	1	1	1	1	1	0	1	1	1	1	1	1	1	1	1	1	1	0	0	1	1	1	1	1	1	1	1	1	1	1	1	1	1	0
		nuoLM	K15863	NADH-quinone oxidoreductase subunit L/M	1	1	1	0	0	0	0	0	0	0	0	0	0	0	0	0	0	1	0	1	0	0	0	0	0	0	0	0	0	0	0	0	0	0	0	0	0	0	0	0	0	0	0	0	0
		nuoM	K00342	NADH-quinone oxidoreductase subunit M	1	1	1	1	1	1	1	1	1	1	0	1	1	1	1	1	0	1	1	1	1	1	1	1	1	1	0	1	1	1	1	1	1	1	1	1	1	1	1	1	1	1	1	1	0
		nuoN	K00343	NADH-quinone oxidoreductase subunit N	0	0	0	0	0	0	0	0	0	0	0	0	0	0	0	0	0	0	0	0	0	0	0	0	0	0	0	0	0	0	0	0	0	0	0	0	0	0	0	0	0	0	0	0	0
		rnfA	K03617	Na+-translocating ferredoxin:NAD+ oxidoreductase subunit A	0	0	0	0	0	0	0	0	0	0	0	0	0	0	0	0	0	0	0	0	0	0	0	0	0	0	0	0	0	0	0	0	0	0	0	0	0	0	0	0	0	0	0	0	0
		rnfB	K03616	Na+-translocating ferredoxin:NAD+ oxidoreductase subunit B	0	0	0	0	0	0	0	0	0	0	0	0	0	0	0	0	0	0	0	0	0	0	0	0	0	0	0	0	0	0	0	0	0	0	0	0	0	0	0	0	0	0	0	0	0
		rnfC	K03615	Na+-translocating ferredoxin:NAD+ oxidoreductase subunit C	0	0	0	0	0	0	0	0	0	0	0	0	0	0	0	0	0	0	0	0	0	0	0	0	0	0	0	0	0	0	0	0	0	0	0	0	0	0	0	0	0	0	0	0	0
		rnfD	K03614	Na+-translocating ferredoxin:NAD+ oxidoreductase subunit D	0	0	0	0	0	0	0	0	0	0	0	0	0	0	0	0	0	0	0	0	0	0	0	0	0	0	0	0	0	0	0	0	0	0	0	0	0	0	0	0	0	0	0	0	0
		rnfE	K03613	Na+-translocating ferredoxin:NAD+ oxidoreductase subunit E	0	0	0	0	0	0	0	0	0	0	0	0	0	0	0	0	0	0	0	0	0	0	0	0	0	0	0	0	0	0	0	0	0	0	0	0	0	0	0	0	0	0	0	0	0
		rnfG	K03612	Na+-translocating ferredoxin:NAD+ oxidoreductase subunit G	0	0	0	0	0	0	0	0	0	0	0	0	0	0	0	0	0	0	0	0	0	0	0	0	0	0	0	0	0	0	0	0	0	0	0	0	0	0	0	0	0	0	0	0	0
		ATPVA, ntpA, atpA	K02117	V/A-type H+/Na+-transporting ATPase subunit A	1	1	1	1	1	1	1	1	1	1	1	1	1	1	1	1	1	1	1	1	1	1	1	1	1	1	1	1	1	1	1	1	1	1	1	1	1	1	1	1	1	1	1	0	1
		ATPVB, ntpB, atpB	K02118	V/A-type H+/Na+-transporting ATPase subunit B	1	1	1	1	1	1	1	1	1	1	1	1	1	1	1	1	1	1	1	1	1	1	1	1	1	1	1	0	1	1	1	1	1	1	1	1	1	1	1	1	1	1	1	0	1
		ATPVC, ntpC, atpC	K02119	V/A-type H+/Na+-transporting ATPase subunit C	0	0	0	0	1	0	1	1	1	0	0	0	1	1	0	1	0	0	0	0	0	0	0	0	1	1	1	1	1	0	0	1	1	1	1	1	1	1	0	1	1	1	1	0	1
		ATPVD, ntpD, atpD	K02120	V/A-type H+/Na+-transporting ATPase subunit D	1	1	1	1	0	1	1	1	1	1	1	1	1	1	1	1	1	1	1	1	0	1	1	1	1	1	1	1	1	1	1	1	0	1	1	1	1	1	0	1	1	1	1	0	1
		ATPVE, ntpE, atpE	K02121	V/A-type H+/Na+-transporting ATPase subunit E	1	1	1	1	1	0	0	0	0	0	0	0	0	0	0	0	1	0	1	1	0	1	0	0	1	1	1	1	1	1	1	1	0	0	1	1	1	0	1	1	1	1	1	0	1
		ATPVF, ntpF, atpF	K02122	V/A-type H+/Na+-transporting ATPase subunit F	0	0	0	0	1	0	0	0	0	0	1	1	1	1	1	1	0	0	0	0	1	1	1	1	1	1	0	1	1	0	1	0	1	0	1	1	1	0	0	1	1	1	1	0	1
		ATPVI, ntpI, atpI	K02123	V/A-type H+/Na+-transporting ATPase subunit I	1	1	1	1	1	0	1	1	1	1	1	1	1	1	1	1	1	1	1	1	1	1	1	1	1	1	1	1	0	0	1	1	1	1	1	1	1	1	0	1	1	1	1	0	1
		ATPVK, ntpK, atpK	K02124	V/A-type H+/Na+-transporting ATPase subunit K	0	0	0	0	1	0	0	0	0	0	0	0	0	0	0	0	0	0	0	0	0	0	0	0	0	0	0	1	1	1	0	0	1	0	0	0	0	1	0	0	0	0	0	0	1
		echA	K14086	ech hydrogenase subunit A	0	0	0	0	0	0	0	0	0	0	0	0	0	0	0	0	0	0	0	0	0	0	0	0	0	0	0	0	0	0	0	0	0	0	0	0	0	0	0	0	0	0	0	0	0
		echB	K14087	ech hydrogenase subunit B	0	0	0	0	0	0	0	0	0	0	0	0	0	0	0	0	0	0	0	0	0	0	0	0	0	0	0	0	0	0	0	0	0	0	0	0	0	0	0	0	0	0	0	0	0
		echC	K14088	ech hydrogenase subunit C	1	1	1	1	1	1	1	1	1	1	1	1	1	1	1	1	1	1	1	1	1	1	1	1	1	1	1	1	0	0	0	1	1	1	1	1	1	1	1	1	1	1	1	1	0
		echD	K14089	ech hydrogenase subunit D	0	1	0	0	0	0	0	0	0	0	0	0	0	0	0	0	0	0	0	0	0	0	0	0	0	0	0	0	0	0	0	0	0	0	0	0	0	0	0	0	0	0	0	0	0
		echE	K14090	ech hydrogenase subunit E	1	1	1	0	1	1	1	1	1	1	1	1	1	1	1	1	1	1	0	1	1	1	1	1	1	1	1	1	0	0	0	1	1	1	1	1	1	1	1	1	1	1	1	1	0
		echF	K14091	ech hydrogenase subunit F	0	0	0	0	1	1	1	1	1	1	0	1	1	1	1	1	0	0	0	0	1	1	1	1	1	1	0	0	0	0	0	1	1	1	1	0	1	0	0	1	0	1	1	0	0
		ehaA	K14092	energy-converting hydrogenase A subunit A	0	0	0	0	0	0	0	0	0	0	0	0	0	0	0	0	0	0	0	0	0	0	0	0	0	0	0	0	0	0	0	0	0	0	0	0	0	0	0	0	0	0	0	0	0
		ehaB	K14093	energy-converting hydrogenase A subunit B	0	0	0	0	0	0	0	0	0	0	0	0	0	0	0	0	0	0	0	0	0	0	0	0	0	0	0	0	0	0	0	0	0	0	0	0	0	0	0	0	0	0	0	0	0
		ehaC	K14094	energy-converting hydrogenase A subunit C	0	0	0	0	0	0	0	0	0	0	0	0	0	0	0	0	0	0	0	0	0	0	0	0	0	0	0	0	0	0	0	0	0	0	0	0	0	0	0	0	0	0	0	0	0
		ehaD	K14095	energy-converting hydrogenase A subunit D	0	0	0	0	0	0	0	0	0	0	0	0	0	0	0	0	0	0	0	0	0	0	0	0	0	0	0	0	0	0	0	0	0	0	0	0	0	0	0	0	0	0	0	0	0
		ehaE	K14096	energy-converting hydrogenase A subunit E	0	0	0	0	0	0	0	0	0	0	0	0	0	0	0	0	0	0	0	0	0	0	0	0	0	0	0	0	0	0	0	0	0	0	0	0	0	0	0	0	0	0	0	0	0
		ehaF	K14097	energy-converting hydrogenase A subunit F	0	0	0	0	0	0	0	0	0	0	0	0	0	0	0	0	0	0	0	0	0	0	0	0	0	0	0	0	0	0	0	0	0	0	0	0	0	0	0	0	0	0	0	0	0
		ehaG	K14098	energy-converting hydrogenase A subunit G	0	0	0	0	0	0	0	0	0	0	0	0	0	0	0	0	0	0	0	0	0	0	0	0	0	0	0	0	0	0	0	0	0	0	0	0	0	0	0	0	0	0	0	0	0
		ehaH	K14099	energy-converting hydrogenase A subunit H	0	0	0	0	0	0	0	0	0	0	0	0	0	0	0	0	0	0	0	0	0	0	0	0	0	0	0	0	0	0	0	0	0	0	0	0	0	0	0	0	0	0	0	0	0
		ehaI	K14100	energy-converting hydrogenase A subunit I	0	0	0	0	0	0	0	0	0	0	0	0	0	0	0	0	0	0	0	0	0	0	0	0	0	0	0	0	0	0	0	0	0	0	0	0	0	0	0	0	0	0	0	0	0
		ehaJ	K14101	energy-converting hydrogenase A subunit J	0	0	0	0	0	0	0	0	0	0	0	0	0	0	0	0	0	0	0	0	0	0	0	0	0	0	0	0	0	0	0	0	0	0	0	0	0	0	0	0	0	0	0	0	0
		ehaK	K14102	energy-converting hydrogenase A subunit K	0	0	0	0	0	0	0	0	0	0	0	0	0	0	0	0	0	0	0	0	0	0	0	0	0	0	0	0	0	0	0	0	0	0	0	0	0	0	0	0	0	0	0	0	0
		ehaL	K14103	energy-converting hydrogenase A subunit L	0	0	0	0	0	0	0	0	0	0	0	0	0	0	0	0	0	0	0	0	0	0	0	0	0	0	0	0	0	0	0	0	0	0	0	0	0	0	0	0	0	0	0	0	0
		ehaM	K14104	energy-converting hydrogenase A subunit M	0	0	0	0	0	0	0	0	0	0	0	0	0	0	0	0	0	0	0	0	0	0	0	0	0	0	0	0	0	0	0	0	0	0	0	0	0	0	0	0	0	0	0	0	0
		ehaN	K14105	energy-converting hydrogenase A subunit N	0	0	0	0	0	0	0	0	0	0	0	0	0	0	0	0	0	0	0	0	0	0	0	0	0	0	0	0	0	0	0	0	0	0	0	0	0	0	0	0	0	0	0	0	0
		ehaO	K14106	energy-converting hydrogenase A subunit O	0	0	0	0	0	0	0	0	0	0	0	0	0	0	0	0	0	0	0	0	0	0	0	0	0	0	0	0	0	0	0	0	0	0	0	0	0	0	0	0	0	0	0	0	0
		ehaP	K14107	energy-converting hydrogenase A subunit P	0	0	0	0	0	0	0	0	0	0	0	0	0	0	0	0	0	0	0	0	0	0	0	0	0	0	0	0	0	0	0	0	0	0	0	0	0	0	0	0	0	0	0	0	0
		ehaQ	K14108	energy-converting hydrogenase A subunit Q	0	0	0	0	0	0	0	0	0	0	0	0	0	0	0	0	0	0	0	0	0	0	0	0	0	0	0	0	0	0	0	0	0	0	0	0	0	0	0	0	0	0	0	0	0
		ehaR	K14109	energy-converting hydrogenase A subunit R	0	0	0	0	0	0	0	0	0	0	0	0	0	0	0	0	0	0	0	0	0	0	0	0	0	0	0	0	0	0	0	0	0	0	0	0	0	0	0	0	0	0	0	0	1
		ehbA	K14110	energy-converting hydrogenase B subunit A	1	1	1	1	1	1	1	1	1	1	1	1	1	1	1	1	1	1	0	1	1	1	1	1	1	1	1	0	0	0	0	0	0	0	0	0	0	0	0	0	0	0	0	0	1
		ehbB	K14111	energy-converting hydrogenase B subunit B	0	0	0	0	0	0	0	0	0	0	0	0	0	0	0	0	0	0	0	0	0	0	0	0	0	0	0	0	0	0	0	0	0	0	0	0	0	0	0	0	0	0	0	0	1
		ehbC	K14112	energy-converting hydrogenase B subunit C	0	0	0	0	0	0	0	0	0	0	0	0	0	0	0	0	0	0	0	0	0	0	0	0	0	0	0	0	0	0	0	0	0	0	0	0	0	0	0	0	0	0	0	0	1
		ehbD	K14113	energy-converting hydrogenase B subunit D	1	1	1	1	1	1	1	1	1	1	1	1	1	1	1	1	1	1	0	1	1	1	1	1	1	1	1	0	0	0	0	0	0	0	0	0	0	0	0	0	0	0	0	0	1
		ehbE	K14114	energy-converting hydrogenase B subunit E	1	1	1	1	1	1	1	1	1	1	1	1	1	1	1	1	1	1	0	1	1	1	1	1	1	1	1	0	0	0	0	0	0	0	0	0	0	0	0	0	0	0	0	0	1
		ehbF	K14115	energy-converting hydrogenase B subunit F	1	1	1	1	1	1	1	1	1	1	1	1	1	1	1	1	1	1	1	1	1	1	1	1	1	1	1	0	0	0	0	0	0	0	0	0	0	0	0	0	0	0	0	0	1
		ehbG	K14116	energy-converting hydrogenase B subunit G	0	0	0	0	0	0	0	0	0	0	0	0	0	0	0	0	0	0	0	0	0	0	0	0	0	0	0	0	0	0	0	0	0	0	0	0	0	0	0	0	0	0	0	0	1
		ehbH	K14117	energy-converting hydrogenase B subunit H	0	0	0	0	0	0	0	0	0	0	0	0	0	0	0	0	0	0	0	0	0	0	0	0	0	0	0	0	0	0	0	0	0	0	0	0	0	0	0	0	0	0	0	0	1
		ehbI	K14118	energy-converting hydrogenase B subunit I	1	1	1	1	1	1	1	1	1	1	1	1	1	1	1	1	1	1	1	1	1	1	1	1	1	1	0	0	0	0	0	0	0	0	0	0	0	0	0	0	0	0	0	0	1
		ehbJ	K14119	energy-converting hydrogenase B subunit J	0	0	0	0	0	0	0	0	0	0	0	0	0	0	0	0	0	0	0	0	0	0	0	0	0	0	0	0	0	0	0	0	0	0	0	0	0	0	0	0	0	0	0	0	1
		ehbK	K14120	energy-converting hydrogenase B subunit K	1	0	0	0	1	0	0	0	0	1	1	0	0	0	0	0	1	0	0	1	0	0	0	1	0	1	1	0	0	0	0	0	0	0	0	0	0	0	0	0	0	0	0	0	1
		ehbL	K14121	energy-converting hydrogenase B subunit L	1	1	1	1	1	1	1	1	1	1	1	1	1	1	0	1	1	1	1	1	1	1	1	1	1	0	1	0	0	0	0	0	0	0	0	0	0	0	0	0	0	0	0	0	1
		ehbM	K14122	energy-converting hydrogenase B subunit M	1	1	1	1	1	1	1	1	1	1	1	1	1	1	0	1	1	1	1	1	1	1	1	1	1	0	1	0	0	0	0	0	0	0	0	0	0	0	0	0	0	0	0	0	1
		ehbN	K14123	energy-converting hydrogenase B subunit N	1	1	1	1	1	1	1	1	1	1	1	1	1	1	0	1	1	1	1	1	1	1	1	1	1	0	1	0	0	0	0	0	0	0	0	0	0	0	0	0	0	0	0	0	1
		ehbO	K14124	energy-converting hydrogenase B subunit O	1	1	1	1	1	1	1	1	1	1	1	1	1	1	0	1	1	1	1	1	1	1	1	1	1	0	1	0	0	0	0	0	0	0	0	0	0	0	0	0	0	0	0	0	1
		ehbP	K14125	energy-converting hydrogenase B subunit P	1	1	1	1	1	0	1	1	1	1	1	1	1	1	0	1	1	1	1	1	1	1	1	1	1	0	1	0	0	0	0	0	0	0	0	0	0	0	0	0	0	0	0	0	1
		ehbQ	K06862	energy-converting hydrogenase B subunit Q	0	0	0	0	0	0	0	0	0	0	0	0	0	0	0	0	0	0	0	0	0	0	0	0	0	0	0	0	0	0	0	0	0	0	0	0	0	0	0	0	0	0	0	0	1
		fqoA	K22171	F420H2: quinone oxidoreductase subunit A	0	0	0	0	0	0	0	0	0	0	0	0	0	0	0	0	0	0	0	0	0	0	0	0	0	0	0	0	0	0	0	0	0	0	0	0	0	0	0	0	0	0	0	0	0
		fqoBC	K22172	F420H2: quinone oxidoreductase subunit B/C	0	0	0	0	0	0	0	0	0	0	0	0	0	0	0	0	0	0	0	0	0	0	0	0	0	0	0	0	0	0	0	0	0	0	0	0	0	0	0	0	0	0	0	0	0
		fqoD	K22173	F420H2: quinone oxidoreductase subunit D	0	0	0	0	0	0	0	0	0	0	0	0	0	0	0	0	0	0	0	0	0	0	0	0	0	0	0	0	0	0	0	0	0	0	0	0	0	0	0	0	0	0	0	0	0
		fqoF	K22174	F420H2: quinone oxidoreductase subunit F	0	0	0	0	0	0	0	0	0	0	0	0	0	0	0	0	0	0	0	0	0	0	0	0	0	0	0	0	0	0	0	0	0	0	0	0	0	0	0	0	0	0	0	0	0
		fqoH	K22175	F420H2: quinone oxidoreductase subunit H	0	0	0	0	0	0	0	0	0	0	0	0	0	0	0	0	0	0	0	0	0	0	0	0	0	0	0	0	0	0	0	0	0	0	0	0	0	0	0	0	0	0	0	0	0
		fqoI	K22176	F420H2: quinone oxidoreductase subunit I	0	0	0	0	0	0	0	0	0	0	0	0	0	0	0	0	0	0	0	0	0	0	0	0	0	0	0	0	0	0	0	0	0	0	0	0	0	0	0	0	0	0	0	0	0
		fqoJ	K22177	F420H2: quinone oxidoreductase subunit J	0	0	0	0	0	0	0	0	0	0	0	0	0	0	0	0	0	0	0	0	0	0	0	0	0	0	0	0	0	0	0	0	0	0	0	0	0	0	0	0	0	0	0	0	0
		fqoK	K22178	F420H2: quinone oxidoreductase subunit K	0	0	0	0	0	0	0	0	0	0	0	0	0	0	0	0	0	0	0	0	0	0	0	0	0	0	0	0	0	0	0	0	0	0	0	0	0	0	0	0	0	0	0	0	0
		fqoL	K22179	F420H2: quinone oxidoreductase subunit L	0	0	0	0	0	0	0	0	0	0	0	0	0	0	0	0	0	0	0	0	0	0	0	0	0	0	0	0	0	0	0	0	0	0	0	0	0	0	0	0	0	0	0	0	0
		fqoM	K22180	F420H2: quinone oxidoreductase subunit M	0	0	0	0	0	0	0	0	0	0	0	0	0	0	0	0	0	0	0	0	0	0	0	0	0	0	0	0	0	0	0	0	0	0	0	0	0	0	0	0	0	0	0	0	0
		fqoN	K22181	F420H2: quinone oxidoreductase subunit N	0	0	0	0	0	0	0	0	0	0	0	0	0	0	0	0	0	0	0	0	0	0	0	0	0	0	0	0	0	0	0	0	0	0	0	0	0	0	0	0	0	0	0	0	0
		fpoA	K22158	F420H2 dehydrogenase subunit A	0	0	0	0	0	0	0	0	0	0	0	0	0	0	0	0	0	0	0	0	0	0	0	0	0	0	0	0	0	0	0	0	0	0	0	0	0	0	0	0	0	0	0	0	0
		fpoB	K22159	F420H2 dehydrogenase subunit B	0	0	0	0	0	0	0	0	0	0	0	0	0	0	0	0	0	0	0	0	0	0	0	0	0	0	0	0	0	0	0	0	0	0	0	0	0	0	0	0	0	0	0	0	0
		fpoC	K22160	F420H2 dehydrogenase subunit C	0	0	0	0	0	0	0	0	0	0	0	0	0	0	0	0	0	0	0	0	0	0	1	0	0	1	0	0	0	0	0	0	0	0	0	0	0	0	0	0	1	1	1	0	0
		fpoD	K22161	F420H2 dehydrogenase subunit D	0	0	0	0	0	0	0	0	0	0	0	0	0	0	0	0	0	0	0	0	0	0	0	0	0	0	0	0	0	0	0	0	0	0	0	0	0	1	0	0	0	0	0	0	0
		fpoF	K22162	F420H2 dehydrogenase subunit F	0	0	0	0	0	0	0	0	0	0	0	0	0	0	0	0	0	0	0	0	0	0	0	0	0	0	0	0	0	0	0	0	0	0	0	0	0	0	0	0	0	0	0	0	0
		fpoH	K22163	F420H2 dehydrogenase subunit H	0	1	0	0	0	0	0	0	0	0	0	0	0	0	0	0	0	0	0	0	0	0	0	0	0	0	0	0	0	0	0	0	0	0	0	0	0	0	0	0	0	0	0	0	0
		fpoI	K22164	F420H2 dehydrogenase subunit I	0	0	0	0	0	0	0	0	0	0	0	0	0	0	0	0	0	0	0	0	0	0	0	0	0	0	0	0	0	0	0	0	0	0	0	0	0	0	0	0	0	0	0	0	0
		fpoJ	K22165	F420H2 dehydrogenase subunit J	0	0	0	0	0	0	0	0	0	0	0	0	0	0	0	0	0	0	0	0	0	0	0	0	0	0	0	0	0	0	0	0	0	0	0	0	0	0	0	0	0	0	0	0	0
		fpoK	K22166	F420H2 dehydrogenase subunit K	0	0	0	0	0	0	0	0	0	0	0	0	0	0	0	0	0	0	0	0	0	0	0	0	0	0	0	0	0	0	0	0	0	0	0	0	0	0	0	0	0	0	0	0	0
		fpoL	K22167	F420H2 dehydrogenase subunit L	0	0	0	0	0	0	0	0	0	0	0	0	0	0	0	0	0	0	0	0	0	0	0	0	0	0	0	0	0	0	0	0	0	0	0	0	0	0	0	0	0	0	0	0	0
		fpoM	K22168	F420H2 dehydrogenase subunit M	0	0	0	0	0	0	0	0	0	0	0	0	0	0	0	0	0	0	0	0	0	0	0	0	0	0	0	0	0	0	0	0	0	0	0	0	0	0	0	0	0	0	0	0	0
		fpoN	K22169	F420H2 dehydrogenase subunit N	0	0	0	0	0	0	0	0	0	0	0	0	0	0	0	0	0	0	0	0	0	0	0	0	0	0	0	0	0	0	0	0	0	0	0	0	0	0	0	0	0	0	0	0	0
		fpoO	K22170	F420H2 dehydrogenase subunit O	0	0	0	0	0	0	0	0	0	0	0	0	0	0	0	0	0	0	0	0	0	0	0	0	0	0	0	0	0	0	0	0	0	0	0	0	0	0	0	0	0	0	0	0	0
[truncated: 3 more columns]

## Sheet: Supplementary Table 5
Supplementary Table 5. Global distribution of 16S rRNA gene sequences and MAGs of Verstraetearchaeales in different biotopes.
Data repository	Data type	Sample accession number	Bioproject accession number	BioSample accession number	Latitude	Longitude	Organism	Description (Environment)	Biotope	Total number of sequences	Number of sequences of ‘Verstraetearchaeota’	Verstraetearchaeota relative abundance
NCBI	16S rRNA	SRR947071	PRJNA214152	SAMN02203841	22.79	113.63	Freshwater metagenome	Freshwater (china: pear river estuary)	Freshwater/sediment	1270	28	0.0220472
NCBI	16S rRNA	SRR947067	PRJNA214152	SAMN02203837	23.11	113.22	Freshwater metagenome	Freshwater (china: pear river estuary)	Freshwater/sediment	2268	4	0.00176367
NCBI	16S rRNA	SRR900437	PRJNA207095	SAMN02191959	44.2907	-110.51	Hot springs metagenome	Hot springs (mat/sediment/water slurry)	Hot spring/sediment	16150	57	0.00352941
NCBI	16S rRNA	SRR900433	PRJNA207095	SAMN02191958	44.2907	-110.51	Hot springs metagenome	Hot springs (mat/sediment/water slurry)	Hot spring/sediment	22697	1234	0.0543684
NCBI	16S rRNA	SRR900431	PRJNA207095	SAMN02191957	44.2907	-110.51	Hot springs metagenome	Hot springs (mat/sediment/water slurry)	Hot spring/sediment	20475	2007	0.098022
NCBI	16S rRNA	SRR900428	PRJNA207095	SAMN02191955	44.2905	-110.51	Hot springs metagenome	Hot springs (mat/sediment/water slurry)	Hot spring/sediment	16849	165	0.00979287
NCBI	16S rRNA	SRR900426	PRJNA207095	SAMN02191954	44.2905	-110.51	Hot springs metagenome	Hot springs (mat/sediment/water slurry)	Hot spring/sediment	8633	24	0.00278003
NCBI	16S rRNA	SRR8745495	PRJNA527308	SAMN11149341	55.13	-77.4	Freshwater metagenome	Sas2e thermokarst lake	Freshwater/sediment	13232	173	0.0130744
NCBI	16S rRNA	SRR8745481	PRJNA527308	SAMN11149331	55.13	-77.4	Freshwater metagenome	Sas2e thermokarst lake	Freshwater/sediment	19681	116	0.00589401
NCBI	16S rRNA	SRR8719973	PRJNA526528	SAMN11106938	58.3979	15.5753	Bioreactor metagenome	Digestate	Anaerobic digester/reactor	36197	67	0.00185098
NCBI	16S rRNA	SRR8719956	PRJNA526528	SAMN11106938	58.3979	15.5753	Bioreactor metagenome	Digestate	Anaerobic digester/reactor	37498	2097	0.055923
NCBI	16S rRNA	SRR8719955	PRJNA526528	SAMN11106938	58.3979	15.5753	Bioreactor metagenome	Digestate	Anaerobic digester/reactor	50317	4048	0.0804499
NCBI	16S rRNA	SRR8719954	PRJNA526528	SAMN11106938	58.3979	15.5753	Bioreactor metagenome	Digestate	Anaerobic digester/reactor	49935	3963	0.0793632
NCBI	16S rRNA	SRR8719953	PRJNA526528	SAMN11106938	58.3979	15.5753	Bioreactor metagenome	Digestate	Anaerobic digester/reactor	48029	4141	0.0862187
NCBI	16S rRNA	SRR8719952	PRJNA526528	SAMN11106938	58.3979	15.5753	Bioreactor metagenome	Digestate	Anaerobic digester/reactor	50169	3517	0.0701031
NCBI	16S rRNA	SRR8719951	PRJNA526528	SAMN11106938	58.3979	15.5753	Bioreactor metagenome	Digestate	Anaerobic digester/reactor	58250	3152	0.0541116
NCBI	16S rRNA	SRR8719950	PRJNA526528	SAMN11106938	58.3979	15.5753	Bioreactor metagenome	Digestate	Anaerobic digester/reactor	47964	3768	0.0785589
NCBI	16S rRNA	SRR8719946	PRJNA526528	SAMN11106938	58.3979	15.5753	Bioreactor metagenome	Digestate	Anaerobic digester/reactor	31007	2158	0.0695972
NCBI	16S rRNA	SRR8719873	PRJNA526528	SAMN11106938	58.3979	15.5753	Bioreactor metagenome	Digestate	Anaerobic digester/reactor	36535	2792	0.0764199
NCBI	16S rRNA	SRR8719872	PRJNA526528	SAMN11106938	58.3979	15.5753	Bioreactor metagenome	Digestate	Anaerobic digester/reactor	23143	1778	0.0768267
NCBI	16S rRNA	SRR8719871	PRJNA526528	SAMN11106938	58.3979	15.5753	Bioreactor metagenome	Digestate	Anaerobic digester/reactor	36355	2351	0.0646679
NCBI	16S rRNA	SRR8719870	PRJNA526528	SAMN11106938	58.3979	15.5753	Bioreactor metagenome	Digestate	Anaerobic digester/reactor	38721	2695	0.0696005
NCBI	16S rRNA	SRR8719869	PRJNA526528	SAMN11106938	58.3979	15.5753	Bioreactor metagenome	Digestate	Anaerobic digester/reactor	38536	2399	0.0622535
NCBI	16S rRNA	SRR8719868	PRJNA526528	SAMN11106938	58.3979	15.5753	Bioreactor metagenome	Digestate	Anaerobic digester/reactor	41878	3323	0.0793495
NCBI	16S rRNA	SRR8719867	PRJNA526528	SAMN11106938	58.3979	15.5753	Bioreactor metagenome	Digestate	Anaerobic digester/reactor	34543	2454	0.0710419
NCBI	16S rRNA	SRR8719865	PRJNA526528	SAMN11106938	58.3979	15.5753	Bioreactor metagenome	Digestate	Anaerobic digester/reactor	36055	44	0.00122036
NCBI	16S rRNA	SRR8719787	PRJNA526528	SAMN11106938	58.3979	15.5753	Bioreactor metagenome	Digestate	Anaerobic digester/reactor	48052	51	0.00106135
NCBI	16S rRNA	SRR8710175	PRJNA526396	SAMN11097611	22.14	113.11	Freshwater sediment metagenome	River sediment	Freshwater/sediment	20673	50	0.00241861
NCBI	16S rRNA	SRR8710171	PRJNA526396	SAMN11097617	22.14	113.11	Freshwater sediment metagenome	River sediment	Freshwater/sediment	9166	33	0.00360026
NCBI	16S rRNA	SRR8710163	PRJNA526396	SAMN11097551	22.14	113.11	Freshwater sediment metagenome	River sediment	Freshwater/sediment	13822	17	0.00122992
NCBI	16S rRNA	SRR8710153	PRJNA526396	SAMN11097584	22.14	113.11	Freshwater sediment metagenome	River sediment	Freshwater/sediment	4757	5	0.00105108
NCBI	16S rRNA	SRR8710148	PRJNA526396	SAMN11097533	22.14	113.11	Freshwater sediment metagenome	River sediment	Freshwater/sediment	14150	102	0.00720848
NCBI	16S rRNA	SRR8710112	PRJNA526396	SAMN11097641	22.14	113.11	Freshwater sediment metagenome	River sediment	Freshwater/sediment	26000	48	0.00184615
NCBI	16S rRNA	SRR8710103	PRJNA526396	SAMN11097600	22.14	113.11	Freshwater sediment metagenome	River sediment	Freshwater/sediment	23523	29	0.00123284
NCBI	16S rRNA	SRR8710083	PRJNA526396	SAMN11097593	22.14	113.11	Freshwater sediment metagenome	River sediment	Freshwater/sediment	13104	33	0.00251832
NCBI	16S rRNA	SRR8710078	PRJNA526396	SAMN11097625	22.14	113.11	Freshwater sediment metagenome	River sediment	Freshwater/sediment	32253	33	0.00102316
NCBI	16S rRNA	SRR8710071	PRJNA526396	SAMN11097626	22.14	113.11	Freshwater sediment metagenome	River sediment	Freshwater/sediment	18180	115	0.00632563
NCBI	16S rRNA	SRR8641017	PRJNA524430	SAMN11026462	N.A.	N.A.	Sludge metagenome	Propionate-fed mesophilic anaerobic chemostat at high dilution rate	Anaerobic digester/reactor	18358	98	0.00533827
NCBI	16S rRNA	SRR8641016	PRJNA524430	SAMN11026455	N.A.	N.A.	Sludge metagenome	Propionate-fed mesophilic anaerobic chemostat at high dilution rate	Anaerobic digester/reactor	11212	44	0.00392437
NCBI	16S rRNA	SRR8641014	PRJNA524430	SAMN11026452	N.A.	N.A.	Sludge metagenome	Propionate-fed mesophilic anaerobic chemostat at high dilution rate	Anaerobic digester/reactor	5407	13	0.00240429
NCBI	16S rRNA	SRR8641010	PRJNA524430	SAMN11026430	N.A.	N.A.	Sludge metagenome	Propionate-fed mesophilic anaerobic chemostat at high dilution rate	Anaerobic digester/reactor	5306	18	0.00339239
NCBI	16S rRNA	SRR8641009	PRJNA524430	SAMN11026429	N.A.	N.A.	Sludge metagenome	Propionate-fed mesophilic anaerobic chemostat at high dilution rate	Anaerobic digester/reactor	33788	40	0.00118385
NCBI	16S rRNA	SRR8641006	PRJNA524430	SAMN11026426	N.A.	N.A.	Sludge metagenome	Propionate-fed mesophilic anaerobic chemostat at high dilution rate	Anaerobic digester/reactor	9077	40	0.00440674
NCBI	16S rRNA	SRR8641005	PRJNA524430	SAMN11026425	N.A.	N.A.	Sludge metagenome	Propionate-fed mesophilic anaerobic chemostat at high dilution rate	Anaerobic digester/reactor	5263	51	0.00969029
NCBI	16S rRNA	SRR8641004	PRJNA524430	SAMN11026446	N.A.	N.A.	Sludge metagenome	Propionate-fed mesophilic anaerobic chemostat at high dilution rate	Anaerobic digester/reactor	10408	33	0.00317064
NCBI	16S rRNA	SRR8641003	PRJNA524430	SAMN11026445	N.A.	N.A.	Sludge metagenome	Propionate-fed mesophilic anaerobic chemostat at high dilution rate	Anaerobic digester/reactor	6646	34	0.00511586
NCBI	16S rRNA	SRR8641002	PRJNA524430	SAMN11026448	N.A.	N.A.	Sludge metagenome	Propionate-fed mesophilic anaerobic chemostat at high dilution rate	Anaerobic digester/reactor	6792	10	0.00147232
NCBI	16S rRNA	SRR8640998	PRJNA524430	SAMN11026434	N.A.	N.A.	Sludge metagenome	Propionate-fed mesophilic anaerobic chemostat at high dilution rate	Anaerobic digester/reactor	8568	22	0.00256769
NCBI	16S rRNA	SRR8640994	PRJNA524430	SAMN11026418	N.A.	N.A.	Sludge metagenome	Propionate-fed mesophilic anaerobic chemostat at high dilution rate	Anaerobic digester/reactor	8158	82	0.0100515
NCBI	16S rRNA	SRR8640993	PRJNA524430	SAMN11026417	N.A.	N.A.	Sludge metagenome	Propionate-fed mesophilic anaerobic chemostat at high dilution rate	Anaerobic digester/reactor	32677	47	0.00143832
NCBI	16S rRNA	SRR8640992	PRJNA524430	SAMN11026416	N.A.	N.A.	Sludge metagenome	Propionate-fed mesophilic anaerobic chemostat at high dilution rate	Anaerobic digester/reactor	6506	16	0.00245927
NCBI	16S rRNA	SRR8640991	PRJNA524430	SAMN11026415	N.A.	N.A.	Sludge metagenome	Propionate-fed mesophilic anaerobic chemostat at high dilution rate	Anaerobic digester/reactor	9491	17	0.00179117
NCBI	16S rRNA	SRR8640989	PRJNA524430	SAMN11026421	N.A.	N.A.	Sludge metagenome	Propionate-fed mesophilic anaerobic chemostat at high dilution rate	Anaerobic digester/reactor	6018	35	0.00581589
NCBI	16S rRNA	SRR8640988	PRJNA524430	SAMN11026420	N.A.	N.A.	Sludge metagenome	Propionate-fed mesophilic anaerobic chemostat at high dilution rate	Anaerobic digester/reactor	8701	29	0.00333295
NCBI	16S rRNA	SRR8640986	PRJNA524430	SAMN11026424	N.A.	N.A.	Sludge metagenome	Propionate-fed mesophilic anaerobic chemostat at high dilution rate	Anaerobic digester/reactor	7868	23	0.00292323
NCBI	16S rRNA	SRR8640985	PRJNA524430	SAMN11026423	N.A.	N.A.	Sludge metagenome	Propionate-fed mesophilic anaerobic chemostat at high dilution rate	Anaerobic digester/reactor	6924	7	0.00101098
NCBI	16S rRNA	SRR8640984	PRJNA524430	SAMN11026457	N.A.	N.A.	Sludge metagenome	Propionate-fed mesophilic anaerobic chemostat at high dilution rate	Anaerobic digester/reactor	12175	23	0.00188912
NCBI	16S rRNA	SRR8640982	PRJNA524430	SAMN11026444	N.A.	N.A.	Sludge metagenome	Propionate-fed mesophilic anaerobic chemostat at high dilution rate	Anaerobic digester/reactor	9561	13	0.00135969
NCBI	16S rRNA	SRR8640981	PRJNA524430	SAMN11026463	N.A.	N.A.	Sludge metagenome	Propionate-fed mesophilic anaerobic chemostat at high dilution rate	Anaerobic digester/reactor	15153	53	0.00349766
NCBI	16S rRNA	SRR8640976	PRJNA524430	SAMN11026436	N.A.	N.A.	Sludge metagenome	Propionate-fed mesophilic anaerobic chemostat at high dilution rate	Anaerobic digester/reactor	7025	9	0.00128114
NCBI	16S rRNA	SRR8640975	PRJNA524430	SAMN11026441	N.A.	N.A.	Sludge metagenome	Propionate-fed mesophilic anaerobic chemostat at high dilution rate	Anaerobic digester/reactor	9031	29	0.00321116
NCBI	16S rRNA	SRR8640974	PRJNA524430	SAMN11026442	N.A.	N.A.	Sludge metagenome	Propionate-fed mesophilic anaerobic chemostat at high dilution rate	Anaerobic digester/reactor	10156	18	0.00177235
NCBI	16S rRNA	SRR8640972	PRJNA524430	SAMN11026440	N.A.	N.A.	Sludge metagenome	Propionate-fed mesophilic anaerobic chemostat at high dilution rate	Anaerobic digester/reactor	7060	15	0.00212465
NCBI	16S rRNA	SRR8640971	PRJNA524430	SAMN11026459	N.A.	N.A.	Sludge metagenome	Propionate-fed mesophilic anaerobic chemostat at high dilution rate	Anaerobic digester/reactor	8308	30	0.00361098
NCBI	16S rRNA	SRR8640969	PRJNA524430	SAMN11026461	N.A.	N.A.	Sludge metagenome	Propionate-fed mesophilic anaerobic chemostat at high dilution rate	Anaerobic digester/reactor	8391	14	0.00166845
NCBI	16S rRNA	SRR8640968	PRJNA524430	SAMN11026458	N.A.	N.A.	Sludge metagenome	Propionate-fed mesophilic anaerobic chemostat at high dilution rate	Anaerobic digester/reactor	13070	42	0.00321347
NCBI	16S rRNA	SRR8607581	PRJNA523725	SAMN10986704	N.A.	N.A.	Soil metagenome	Oil sludge	Petroleum field	55528	140	0.00252125
NCBI	16S rRNA	SRR8586762	PRJNA505597	SAMN10358641	19.076	72.8777	Biogas fermenter metagenome	Anaerobic digester	Anaerobic digester/reactor	246542	322	0.00130607
NCBI	16S rRNA	SRR8584988	PRJNA522873	SAMN10959211	23.11	102.74	Soil metagenome	Soil	Soil	20308	138	0.00679535
NCBI	16S rRNA	SRR8584984	PRJNA522873	SAMN10959213	23.11	102.74	Soil metagenome	Soil	Soil	14098	387	0.0274507
NCBI	16S rRNA	SRR8584978	PRJNA522873	SAMN10959228	23.11	102.74	Soil metagenome	Soil	Soil	16804	51	0.00303499
NCBI	16S rRNA	SRR8584976	PRJNA522873	SAMN10959230	23.11	102.74	Soil metagenome	Soil	Soil	5264	44	0.00835866
NCBI	16S rRNA	SRR8584975	PRJNA522873	SAMN10959229	23.11	102.74	Soil metagenome	Soil	Soil	8645	30	0.00347021
NCBI	16S rRNA	SRR8584974	PRJNA522873	SAMN10959232	23.11	102.74	Soil metagenome	Soil	Soil	11575	298	0.0257451
NCBI	16S rRNA	SRR8584971	PRJNA522873	SAMN10959216	23.11	102.74	Soil metagenome	Soil	Soil	11919	47	0.00394328
NCBI	16S rRNA	SRR8584968	PRJNA522873	SAMN10959219	23.11	102.74	Soil metagenome	Soil	Soil	11852	170	0.0143436
NCBI	16S rRNA	SRR8584967	PRJNA522873	SAMN10959220	23.11	102.74	Soil metagenome	Soil	Soil	8325	32	0.00384384
NCBI	16S rRNA	SRR8554650	PRJNA520198	SAMN10866146	63.0472	21.7116	Soil metagenome	Soil from un-oxidized zone	Soil	6237222	8169	0.00130972
NCBI	16S rRNA	SRR8554432	PRJNA519342	SAMN10864855	44.11	-88.23	Activated sludge metagenome	Anaerobic digester	Anaerobic digester/reactor	2834528	18421	0.00649879
NCBI	16S rRNA	SRR8554430	PRJNA519341	SAMN10865506	44.11	-88.23	Activated sludge metagenome	Anaerobic digester	Anaerobic digester/reactor	4212694	11800	0.00280106
NCBI	16S rRNA	SRR8554429	PRJNA519339	SAMN10864917	44.11	-88.23	Activated sludge metagenome	Anaerobic digester	Anaerobic digester/reactor	2682322	8893	0.00331541
NCBI	16S rRNA	SRR8554428	PRJNA519340	SAMN10865523	44.11	-88.23	Activated sludge metagenome	Anaerobic digester	Anaerobic digester/reactor	5579241	20460	0.00366717
NCBI	16S rRNA	SRR8554426	PRJNA519335	SAMN10864911	44.11	-88.23	Activated sludge metagenome	Anaerobic digester	Anaerobic digester/reactor	2773170	10397	0.00374914
NCBI	16S rRNA	SRR8554424	PRJNA519336	SAMN10864918	44.11	-88.23	Activated sludge metagenome	Anaerobic digester	Anaerobic digester/reactor	3171893	12481	0.00393487
NCBI	16S rRNA	SRR8554423	PRJNA519333	SAMN10865505	44.11	-88.23	Activated sludge metagenome	Anaerobic digester	Anaerobic digester/reactor	2775782	12106	0.00436129
NCBI	16S rRNA	SRR8554422	PRJNA519334	SAMN10864865	44.11	-88.23	Activated sludge metagenome	Anaerobic digester	Anaerobic digester/reactor	880243	11340	0.0128828
NCBI	16S rRNA	SRR8554421	PRJNA519338	SAMN10864937	44.11	-88.23	Activated sludge metagenome	Anaerobic digester	Anaerobic digester/reactor	3321319	87416	0.0263197
NCBI	16S rRNA	SRR8554420	PRJNA519337	SAMN10864866	44.11	-88.23	Activated sludge metagenome	Anaerobic digester	Anaerobic digester/reactor	2345522	40271	0.0171693
NCBI	16S rRNA	SRR8553931	PRJNA521556	SAMN10907529	31.84	117.29	Sludge metagenome	Sludge	Anaerobic digester/reactor	46143	151	0.00327244
NCBI	16S rRNA	SRR8553914	PRJNA521556	SAMN10907514	31.84	117.29	Sludge metagenome	Sludge	Anaerobic digester/reactor	39912	41	0.00102726
NCBI	16S rRNA	SRR8549912	PRJNA520802	SAMN10882654	N.A.	N.A.	Freshwater sediment metagenome	Freshwater pond	Freshwater/sediment	495347	922	0.00186132
NCBI	16S rRNA	SRR8549911	PRJNA520802	SAMN10882655	N.A.	N.A.	Freshwater sediment metagenome	Freshwater pond	Freshwater/sediment	168303	638	0.00379078
NCBI	16S rRNA	SRR8549909	PRJNA520802	SAMN10882653	N.A.	N.A.	Freshwater sediment metagenome	Freshwater pond	Freshwater/sediment	210934	241	0.00114254
NCBI	16S rRNA	SRR8549908	PRJNA520802	SAMN10882649	N.A.	N.A.	Freshwater sediment metagenome	Freshwater pond	Freshwater/sediment	212613	545	0.00256334
NCBI	16S rRNA	SRR8506368	PRJNA517284	SAMN10824114	N.A.	N.A.	Sediment metagenome	Sediments in karst wetland restored by vegetation	Freshwater/sediment	38611	39	0.00101007
NCBI	16S rRNA	SRR8506363	PRJNA517284	SAMN10824114	N.A.	N.A.	Sediment metagenome	Sediments in karst wetland restored by vegetation	Freshwater/sediment	49486	198	0.00400113
NCBI	16S rRNA	SRR8400075	PRJNA513152	SAMN10697239	30.12	116.81	Freshwater sediment metagenome	River sediment	Freshwater/sediment	27324	77	0.00281804
NCBI	16S rRNA	SRR8392692	PRJNA355587	SAMN10092546	38.4967	-77.3155	Sediment metagenomen	Pond sediment	Freshwater/sediment	16183	23	0.00142124
NCBI	16S rRNA	SRR8392691	PRJNA355587	SAMN10092553	38.4967	-77.3155	Sediment metagenomen	Pond sediment	Freshwater/sediment	17868	18	0.00100739
NCBI	16S rRNA	SRR8392688	PRJNA355587	SAMN10092550	38.4967	-77.3155	Sediment metagenomen	Pond sediment	Freshwater/sediment	20241	40	0.00197619
NCBI	16S rRNA	SRR8392686	PRJNA355587	SAMN10092554	38.4967	-77.3155	Sediment metagenomen	Pond sediment	Freshwater/sediment	18239	50	0.00274138
NCBI	16S rRNA	SRR8392673	PRJNA355587	SAMN10092535	38.4967	-77.3155	Sediment metagenomen	Pond sediment	Freshwater/sediment	14493	20	0.00137998
NCBI	16S rRNA	SRR8392665	PRJNA355587	SAMN10092531	38.4967	-77.3155	Sediment metagenomen	Pond sediment	Freshwater/sediment	10814	20	0.00184945
NCBI	16S rRNA	SRR8392664	PRJNA355587	SAMN10092530	38.4967	-77.3155	Sediment metagenomen	Pond sediment	Freshwater/sediment	7393	11	0.00148789
NCBI	16S rRNA	SRR8392661	PRJNA355587	SAMN10092544	38.4967	-77.3155	Sediment metagenomen	Pond sediment	Freshwater/sediment	18113	27	0.00149064
NCBI	16S rRNA	SRR8392660	PRJNA355587	SAMN10092545	38.4967	-77.3155	Sediment metagenomen	Pond sediment	Freshwater/sediment	16871	17	0.00100765
NCBI	16S rRNA	SRR8392631	PRJNA355587	SAMN10092522	38.4967	-77.3155	Sediment metagenomen	Pond sediment	Freshwater/sediment	15304	16	0.00104548
NCBI	16S rRNA	SRR8392626	PRJNA355587	SAMN10092519	38.4967	-77.3155	Sediment metagenomen	Pond sediment	Freshwater/sediment	16967	19	0.00111982
NCBI	16S rRNA	SRR8392588	PRJNA355587	SAMN10092543	38.4967	-77.3155	Sediment metagenomen	Pond sediment	Freshwater/sediment	12453	20	0.00160604
NCBI	16S rRNA	SRR8392586	PRJNA355587	SAMN10092537	38.4967	-77.3155	Sediment metagenomen	Pond sediment	Freshwater/sediment	12997	17	0.00130799
NCBI	16S rRNA	SRR8351615	PRJNA510526	SAMN10390815	23.05	113.41	Sludge metagenome	Paper sludge	Anaerobic digester/reactor	80922	137	0.00169299
NCBI	16S rRNA	SRR8351614	PRJNA510526	SAMN10390814	23.05	113.41	Sludge metagenome	Paper sludge	Anaerobic digester/reactor	98862	817	0.00826404
NCBI	16S rRNA	SRR8351613	PRJNA510526	SAMN10390817	23.05	113.41	Sludge metagenome	Paper sludge	Anaerobic digester/reactor	102688	384	0.00373948
NCBI	16S rRNA	SRR8351612	PRJNA510526	SAMN10390816	23.05	113.41	Sludge metagenome	Paper sludge	Anaerobic digester/reactor	104369	391	0.00374632
NCBI	16S rRNA	SRR8351611	PRJNA510526	SAMN10390811	23.05	113.41	Sludge metagenome	Paper sludge	Anaerobic digester/reactor	89944	564	0.00627057
NCBI	16S rRNA	SRR8351610	PRJNA510526	SAMN10390810	23.05	113.41	Wastewater metagenome	Waste water treatment plant	Anaerobic digester/reactor	118276	1726	0.014593
NCBI	16S rRNA	SRR8351609	PRJNA510526	SAMN10390813	23.05	113.41	Sludge metagenome	Paper sludge	Anaerobic digester/reactor	108301	491	0.00453366
NCBI	16S rRNA	SRR8351608	PRJNA510526	SAMN10390812	23.05	113.41	Sludge metagenome	Paper sludge	Anaerobic digester/reactor	90916	424	0.00466365
NCBI	16S rRNA	SRR828590	PRJNA196819	SAMN02044483	N.A.	N.A.	Freshwater metagenome	Lake kivu water sample depth at 80m	Freshwater/sediment	5493	23	0.00418715
NCBI	16S rRNA	SRR828579	PRJNA196819	SAMN02044472	N.A.	N.A.	Freshwater metagenome	Lake kivu water sample depth at 80m	Freshwater/sediment	4855	6	0.00123584
NCBI	16S rRNA	SRR8285039	PRJNA508441	SAMN10522718	22.5	113.98	Marine metagenome	The shenzhen river-bay watershed in china	Marine water/sediment	56333	196	0.00347931
NCBI	16S rRNA	SRR8285033	PRJNA508441	SAMN10522716	22.5	114.01	Marine metagenome	The shenzhen river-bay watershed in china	Marine water/sediment	67335	347	0.00515334
NCBI	16S rRNA	SRR8285031	PRJNA508441	SAMN10522714	22.54	113.95	Freshwater metagenome	The shenzhen river-bay watershed in china	Freshwater/sediment	86179	116	0.00134604
NCBI	16S rRNA	SRR8285014	PRJNA508441	SAMN10522731	22.55	113.95	Freshwater metagenome	The shenzhen river-bay watershed in china	Freshwater/sediment	127076	128	0.00100727
NCBI	16S rRNA	SRR8284936	PRJNA508441	SAMN10522693	22.58	113.95	Freshwater metagenome	The shenzhen river-bay watershed in china	Freshwater/sediment	75308	89	0.00118181
NCBI	16S rRNA	SRR8284927	PRJNA508441	SAMN10522698	22.5	114.01	Marine metagenome	The shenzhen river-bay watershed in china	Marine water/sediment	53981	193	0.00357533
NCBI	16S rRNA	SRR8284922	PRJNA508441	SAMN10522749	22.55	113.95	Freshwater metagenome	The shenzhen river-bay watershed in china	Freshwater/sediment	57321	145	0.00252961
NCBI	16S rRNA	SRR8284910	PRJNA508441	SAMN10522704	22.47	113.94	Marine metagenome	The shenzhen river-bay watershed in china	Marine water/sediment	104012	129	0.00124024
NCBI	16S rRNA	SRR8284909	PRJNA508441	SAMN10522703	22.49	113.95	Marine metagenome	The shenzhen river-bay watershed in china	Marine water/sediment	86944	87	0.00100064
NCBI	16S rRNA	SRR8284907	PRJNA508441	SAMN10522705	22.47	113.93	Marine metagenome	The shenzhen river-bay watershed in china	Marine water/sediment	70285	134	0.00190652
NCBI	16S rRNA	SRR8284906	PRJNA508441	SAMN10522748	22.56	113.95	Freshwater metagenome	The shenzhen river-bay watershed in china	Freshwater/sediment	63191	68	0.0010761
NCBI	16S rRNA	SRR8284898	PRJNA508441	SAMN10522746	22.59	113.98	Freshwater metagenome	The shenzhen river-bay watershed in china	Freshwater/sediment	94391	116	0.00122893
NCBI	16S rRNA	SRR8284897	PRJNA508441	SAMN10522745	22.59	113.96	Freshwater metagenome	The shenzhen river-bay watershed in china	Freshwater/sediment	100997	1661	0.016446
NCBI	16S rRNA	SRR769714	PRJNA187566	SAMN01939295	0.45	36.25	Aquatic metagenome	Soda lake sediment	Soda Lake sediment	842	3	0.00356295
NCBI	16S rRNA	SRR769690	PRJNA187566	SAMN01939271	-2	36.2167	Aquatic metagenome	Soda lake sediment	Soda Lake sediment	2723	4	0.00146897
NCBI	16S rRNA	SRR769683	PRJNA187566	SAMN01939264	-2	36.2167	Aquatic metagenome	Soda lake sediment	Soda Lake sediment	1968	5	0.00254065
NCBI	16S rRNA	SRR769681	PRJNA187566	SAMN01939262	-2	36.2167	Aquatic metagenome	Soda lake sediment	Soda Lake sediment	1486	16	0.0107672
NCBI	16S rRNA	SRR769680	PRJNA187566	SAMN01939261	-2	36.2167	Aquatic metagenome	Soda lake sediment	Soda Lake sediment	2041	32	0.0156786
NCBI	16S rRNA	SRR769626	PRJNA187566	SAMN01939207	0.3333	36.25	Aquatic metagenome	Soda lake sediment	Soda Lake sediment	1636	3	0.00183374
NCBI	16S rRNA	SRR769624	PRJNA187566	SAMN01939205	0.3333	36.25	Aquatic metagenome	Soda lake sediment	Soda Lake sediment	2484	164	0.0660225
NCBI	16S rRNA	SRR769623	PRJNA187566	SAMN01939204	0.3333	36.25	Aquatic metagenome	Soda lake sediment	Soda Lake sediment	2001	3	0.00149925
NCBI	16S rRNA	SRR769622	PRJNA187566	SAMN01939203	0.3333	36.25	Aquatic metagenome	Soda lake sediment	Soda Lake sediment	2887	88	0.0304815
NCBI	16S rRNA	SRR769619	PRJNA187566	SAMN01939200	0.3333	36.25	Aquatic metagenome	Soda lake sediment	Soda Lake sediment	2228	22	0.00987433
NCBI	16S rRNA	SRR769615	PRJNA187566	SAMN01939196	0.3333	36.25	Aquatic metagenome	Soda lake sediment	Soda Lake sediment	2663	118	0.0443109
NCBI	16S rRNA	SRR769614	PRJNA187566	SAMN01939195	0.3333	36.25	Aquatic metagenome	Soda lake sediment	Soda Lake sediment	6022	588	0.097642
NCBI	16S rRNA	SRR769613	PRJNA187566	SAMN01939194	0.3333	36.25	Aquatic metagenome	Soda lake sediment	Soda Lake sediment	3095	10	0.00323102
NCBI	16S rRNA	SRR769612	PRJNA187566	SAMN01939193	0.3333	36.25	Aquatic metagenome	Soda lake sediment	Soda Lake sediment	4153	8	0.00192632
NCBI	16S rRNA	SRR7650199	PRJNA484628	SAMN09767325	31.9927	34.8172	Gut metagenome	Bos taurus, 60-microns-protozoab9	Gut	21296	25	0.00117393
NCBI	16S rRNA	SRR7650175	PRJNA484628	SAMN09767329	31.9927	34.8172	Gut metagenome	Bos taurus, 60-microns-protozoab9	Gut	5363	7	0.00130524
NCBI	16S rRNA	SRR7650174	PRJNA484628	SAMN09767326	31.9927	34.8172	Gut metagenome	Bos taurus, 60-microns-protozoab9	Gut	10757	33	0.00306777
NCBI	16S rRNA	SRR7650158	PRJNA484628	SAMN09767332	31.9927	34.8172	Gut metagenome	Bos taurus, 60-microns-protozoab9	Gut	5578	8	0.00143421
NCBI	16S rRNA	SRR7650155	PRJNA484628	SAMN09767330	31.9927	34.8172	Gut metagenome	Bos taurus, 60-microns-protozoab9	Gut	11804	51	0.00432057
NCBI	16S rRNA	SRR7650154	PRJNA484628	SAMN09767327	31.9927	34.8172	Gut metagenome	Bos taurus, 60-microns-protozoab9	Gut	23874	86	0.00360225
NCBI	16S rRNA	SRR7650153	PRJNA484628	SAMN09767328	31.9927	34.8172	Gut metagenome	Bos taurus, 60-microns-protozoab9	Gut	59231	65	0.0010974
NCBI	16S rRNA	SRR7650152	PRJNA484628	SAMN09767331	31.9927	34.8172	Gut metagenome	Bos taurus, 60-microns-protozoab9	Gut	9947	58	0.0058309
NCBI	16S rRNA	SRR7548211	PRJNA482160	SAMN09699106	45.24	-73.33	Wastewater metagenome	Wastewater	Anaerobic digester/reactor	125338	294	0.00234566
NCBI	16S rRNA	SRR7548210	PRJNA482160	SAMN09699105	45.24	-73.33	Wastewater metagenome	Wastewater	Anaerobic digester/reactor	141997	856	0.0060283
NCBI	16S rRNA	SRR7548209	PRJNA482160	SAMN09699110	45.24	-73.33	Wastewater metagenome	Wastewater	Anaerobic digester/reactor	139955	176	0.00125755
NCBI	16S rRNA	SRR7548208	PRJNA482160	SAMN09699109	45.24	-73.33	Wastewater metagenome	Wastewater	Anaerobic digester/reactor	152128	195	0.00128182
NCBI	16S rRNA	SRR7548206	PRJNA482160	SAMN09699101	45.24	-73.33	Wastewater metagenome	Wastewater	Anaerobic digester/reactor	155151	158	0.00101836
NCBI	16S rRNA	SRR7548205	PRJNA482160	SAMN09699100	45.24	-73.33	Wastewater metagenome	Wastewater	Anaerobic digester/reactor	103054	130	0.00126147
NCBI	16S rRNA	SRR7548204	PRJNA482160	SAMN09699099	45.24	-73.33	Wastewater metagenome	Wastewater	Anaerobic digester/reactor	148224	699	0.00471584
NCBI	16S rRNA	SRR7548203	PRJNA482160	SAMN09699104	45.24	-73.33	Wastewater metagenome	Wastewater	Anaerobic digester/reactor	133726	423	0.00316318
NCBI	16S rRNA	SRR7548202	PRJNA482160	SAMN09699108	45.24	-73.33	Wastewater metagenome	Wastewater	Anaerobic digester/reactor	125554	296	0.00235755
NCBI	16S rRNA	SRR7548201	PRJNA482160	SAMN09699107	45.24	-73.33	Wastewater metagenome	Wastewater	Anaerobic digester/reactor	131374	176	0.00133969
NCBI	16S rRNA	SRR7183062	PRJNA471552	SAMN09211837	63.2524	-120.846	Hydrocarbon metagenome	Shale (fracing fluids)	Petroleum field	70454	140	0.00198711
NCBI	16S rRNA	SRR6976377	PRJNA449441	SAMN08904500	45.59	84.77	Oil field metagenome	Oil field	Petroleum field	9446	15	0.00158797
NCBI	16S rRNA	SRR6829007	PRJNA438037	SAMN08689235	30.37	113.37	Aquatic metagenome	Groundwater	Groundwater	53231	65	0.00122109
NCBI	16S rRNA	SRR6377055	PRJNA416782	SAMN07964863	42.63	1.79	Freshwater sediment metagenome	Lake sediment	Freshwater/sediment	11887	31	0.00260789
NCBI	16S rRNA	SRR6377050	PRJNA416782	SAMN07964874	42.62	0.88	Freshwater sediment metagenome	Lake sediment	Freshwater/sediment	16586	54	0.00325576
NCBI	16S rRNA	SRR6377046	PRJNA416782	SAMN07964870	42.84	0.5	Freshwater sediment metagenome	Lake sediment	Freshwater/sediment	17080	60	0.00351288
NCBI	16S rRNA	SRR6377040	PRJNA416782	SAMN07964890	42.59	1.43	Freshwater sediment metagenome	Lake sediment	Freshwater/sediment	25275	174	0.00688427
NCBI	16S rRNA	SRR6377038	PRJNA416782	SAMN07964892	42.79	0.86	Freshwater sediment metagenome	Lake sediment	Freshwater/sediment	16488	292	0.0177098
NCBI	16S rRNA	SRR6377036	PRJNA416782	SAMN07964876	42.84	0.5	Freshwater sediment metagenome	Lake sediment	Freshwater/sediment	18245	78	0.00427514
NCBI	16S rRNA	SRR6377035	PRJNA416782	SAMN07964875	42.74	1.34	Freshwater sediment metagenome	Lake sediment	Freshwater/sediment	14000	66	0.00471429
NCBI	16S rRNA	SRR6314114	PRJNA419286	SAMN08048990	60.25	25.3	Marine metagenome	Baltic sea water and littoral sediment	Coastal sediment	53978	133	0.00246397
NCBI	16S rRNA	SRR629168	PRJNA171759	SAMN01096358	N.A.	N.A.	Hot springs metagenome	Hot springs	Hot spring/sediment	1311	2	0.00152555
NCBI	16S rRNA	SRR620257	PRJNA179276	SAMN01805428	N.A.	N.A.	Hot springs metagenome	Hot springs	Hot spring/sediment	1464	39	0.0266393
NCBI	16S rRNA	SRR620249	PRJNA179276	SAMN01805420	N.A.	N.A.	Hot springs metagenome	Hot springs	Hot spring/sediment	9503	14	0.00147322
NCBI	16S rRNA	SRR6186920	PRJNA414748	SAMN07809310	61.2	25.1	Freshwater metagenome	Sediments of a boreal, humic lake	Freshwater/sediment	3552	4	0.00112613
NCBI	16S rRNA	SRR6186917	PRJNA414748	SAMN07809314	61.2	25.1	Freshwater metagenome	Sediments of a boreal, humic lake	Freshwater/sediment	5757	8	0.00138961
NCBI	16S rRNA	SRR6186905	PRJNA414748	SAMN07809312	61.2	25.1	Freshwater metagenome	Sediments of a boreal, humic lake	Freshwater/sediment	4808	6	0.00124792
NCBI	16S rRNA	SRR6186898	PRJNA414748	SAMN07809330	61.2	25.1	Freshwater metagenome	Sediments of a boreal, humic lake	Freshwater/sediment	5710	6	0.00105079
NCBI	16S rRNA	SRR6186887	PRJNA414748	SAMN07809318	61.2	25.1	Freshwater metagenome	Sediments of a boreal, humic lake	Freshwater/sediment	5998	12	0.00200067
NCBI	16S rRNA	SRR5916393	PRJNA317932	SAMN07483677	-13.9747	141.653	Soil metagenome	Australian soils	Soil	44573	57	0.0012788
NCBI	16S rRNA	SRR5916347	PRJNA317932	SAMN07483655	-13.8299	143.099	Soil metagenome	Australian soils	Soil	63605	179	0.00281424
NCBI	16S rRNA	SRR5916346	PRJNA317932	SAMN07483654	-13.8347	143.098	Soil metagenome	Australian soils	Soil	55019	131	0.002381
NCBI	16S rRNA	SRR5916301	PRJNA317932	SAMN07483663	-13.7723	141.888	Soil metagenome	Australian soils	Soil	42842	178	0.0041548
NCBI	16S rRNA	SRR5916203	PRJNA317932	SAMN07483651	-13.6812	143.14	Soil metagenome	Australian soils	Soil	74122	113	0.00152451
NCBI	16S rRNA	SRR5916201	PRJNA317932	SAMN07483653	-13.8347	143.098	Soil metagenome	Australian soils	Soil	63110	144	0.00228173
NCBI	16S rRNA	SRR5916131	PRJNA317932	SAMN07483659	-13.5323	143.048	Soil metagenome	Australian soils	Soil	78711	131	0.00166432
NCBI	16S rRNA	SRR5916106	PRJNA317932	SAMN07483665	-13.7701	141.89	Soil metagenome	Australian soils	Soil	33692	50	0.00148403
NCBI	16S rRNA	SRR5916037	PRJNA317932	SAMN07483675	-13.8439	141.616	Soil metagenome	Australian soils	Soil	51888	117	0.00225486
NCBI	16S rRNA	SRR5915988	PRJNA317932	SAMN07483657	-13.534	143.048	Soil metagenome	Australian soils	Soil	74065	107	0.00144468
NCBI	16S rRNA	SRR5915967	PRJNA317932	SAMN07483667	-13.6024	141.681	Soil metagenome	Australian soils	Soil	34895	59	0.00169079
NCBI	16S rRNA	SRR5915964	PRJNA317932	SAMN07483669	-13.6031	141.684	Soil metagenome	Australian soils	Soil	19783	22	0.00111207
NCBI	16S rRNA	SRR5860981	PRJNA395500	SAMN07407775	22.49	114.03	Sediment metagenome	Surface sediments of a subtropical coastal wetland	Coastal sediment	50514	201	0.00397909
NCBI	16S rRNA	SRR5860980	PRJNA395500	SAMN07407774	22.49	114.03	Sediment metagenome	Surface sediments of a subtropical coastal wetland	Coastal sediment	28480	42	0.00147472
NCBI	16S rRNA	SRR5860979	PRJNA395500	SAMN07407769	22.49	114.03	Sediment metagenome	Surface sediments of a subtropical coastal wetland	Coastal sediment	46008	113	0.00245609
NCBI	16S rRNA	SRR5860978	PRJNA395500	SAMN07407768	22.49	114.03	Sediment metagenome	Surface sediments of a subtropical coastal wetland	Coastal sediment	46856	51	0.00108844
NCBI	16S rRNA	SRR5860976	PRJNA395500	SAMN07407766	22.49	114.03	Sediment metagenome	Surface sediments of a subtropical coastal wetland	Coastal sediment	19992	35	0.0017507
NCBI	16S rRNA	SRR5860961	PRJNA395500	SAMN07407760	22.49	114.03	Sediment metagenome	Surface sediments of a subtropical coastal wetland	Coastal sediment	69310	223	0.00321743
NCBI	16S rRNA	SRR5860960	PRJNA395500	SAMN07407761	22.49	114.03	Sediment metagenome	Surface sediments of a subtropical coastal wetland	Coastal sediment	24356	29	0.00119067
NCBI	16S rRNA	SRR5860959	PRJNA395500	SAMN07407762	22.49	114.03	Sediment metagenome	Surface sediments of a subtropical coastal wetland	Coastal sediment	26256	51	0.00194241
NCBI	16S rRNA	SRR5860957	PRJNA395500	SAMN07407756	22.49	114.03	Sediment metagenome	Surface sediments of a subtropical coastal wetland	Coastal sediment	42584	93	0.00218392
NCBI	16S rRNA	SRR5860956	PRJNA395500	SAMN07407757	22.49	114.03	Sediment metagenome	Surface sediments of a subtropical coastal wetland	Coastal sediment	44085	156	0.00353862
NCBI	16S rRNA	SRR5860955	PRJNA395500	SAMN07407758	22.49	114.03	Sediment metagenome	Surface sediments of a subtropical coastal wetland	Coastal sediment	33017	60	0.00181725
NCBI	16S rRNA	SRR5860920	PRJNA395500	SAMN07407797	22.49	114.03	Sediment metagenome	Surface sediments of a subtropical coastal wetland	Coastal sediment	76234	90	0.00118058
NCBI	16S rRNA	SRR5860919	PRJNA395500	SAMN07407802	22.49	114.03	Sediment metagenome	Surface sediments of a subtropical coastal wetland	Coastal sediment	31746	39	0.0012285
NCBI	16S rRNA	SRR5860916	PRJNA395500	SAMN07407801	22.49	114.03	Sediment metagenome	Surface sediments of a subtropical coastal wetland	Coastal sediment	31411	32	0.00101875
NCBI	16S rRNA	SRR5860911	PRJNA395500	SAMN07407789	22.49	114.03	Sediment metagenome	Surface sediments of a subtropical coastal wetland	Coastal sediment	48661	69	0.00141797
NCBI	16S rRNA	SRR5860910	PRJNA395500	SAMN07407788	22.49	114.03	Sediment metagenome	Surface sediments of a subtropical coastal wetland	Coastal sediment	28983	29	0.00100059
NCBI	16S rRNA	SRR5860909	PRJNA395500	SAMN07407791	22.49	114.03	Sediment metagenome	Surface sediments of a subtropical coastal wetland	Coastal sediment	31121	127	0.00408085
NCBI	16S rRNA	SRR5860906	PRJNA395500	SAMN07407792	22.49	114.03	Sediment metagenome	Surface sediments of a subtropical coastal wetland	Coastal sediment	38530	52	0.0013496
NCBI	16S rRNA	SRR5860891	PRJNA395500	SAMN07407809	22.49	114.03	Sediment metagenome	Surface sediments of a subtropical coastal wetland	Coastal sediment	54198	176	0.00324735
NCBI	16S rRNA	SRR5860890	PRJNA395500	SAMN07407808	22.49	114.03	Sediment metagenome	Surface sediments of a subtropical coastal wetland	Coastal sediment	48581	87	0.00179082
NCBI	16S rRNA	SRR5860889	PRJNA395500	SAMN07407811	22.49	114.03	Sediment metagenome	Surface sediments of a subtropical coastal wetland	Coastal sediment	38584	47	0.00121812
NCBI	16S rRNA	SRR5860888	PRJNA395500	SAMN07407810	22.49	114.03	Sediment metagenome	Surface sediments of a subtropical coastal wetland	Coastal sediment	36108	136	0.00376648
NCBI	16S rRNA	SRR5860887	PRJNA395500	SAMN07407813	22.49	114.03	Sediment metagenome	Surface sediments of a subtropical coastal wetland	Coastal sediment	27822	33	0.00118611
NCBI	16S rRNA	SRR5860886	PRJNA395500	SAMN07407812	22.49	114.03	Sediment metagenome	Surface sediments of a subtropical coastal wetland	Coastal sediment	43955	176	0.0040041
NCBI	16S rRNA	SRR5860885	PRJNA395500	SAMN07407784	22.49	114.03	Sediment metagenome	Surface sediments of a subtropical coastal wetland	Coastal sediment	42745	495	0.0115803
NCBI	16S rRNA	SRR5860884	PRJNA395500	SAMN07407785	22.49	114.03	Sediment metagenome	Surface sediments of a subtropical coastal wetland	Coastal sediment	45965	261	0.00567823
NCBI	16S rRNA	SRR5860883	PRJNA395500	SAMN07407778	22.49	114.03	Sediment metagenome	Surface sediments of a subtropical coastal wetland	Coastal sediment	41551	311	0.00748478
NCBI	16S rRNA	SRR5860881	PRJNA395500	SAMN07407776	22.49	114.03	Sediment metagenome	Surface sediments of a subtropical coastal wetland	Coastal sediment	31763	151	0.00475396
NCBI	16S rRNA	SRR5860879	PRJNA395500	SAMN07407782	22.49	114.03	Sediment metagenome	Surface sediments of a subtropical coastal wetland	Coastal sediment	48822	190	0.00389169
NCBI	16S rRNA	SRR5860878	PRJNA395500	SAMN07407783	22.49	114.03	Sediment metagenome	Surface sediments of a subtropical coastal wetland	Coastal sediment	39270	495	0.012605
NCBI	16S rRNA	SRR5860877	PRJNA395500	SAMN07407780	22.49	114.03	Sediment metagenome	Surface sediments of a subtropical coastal wetland	Coastal sediment	32612	94	0.00288237
NCBI	16S rRNA	SRR5826126	PRJNA394057	SAMN07348365	31.15	108.56	Soil metagenome	Wetland, soil	Soil	32441	84	0.00258932
NCBI	16S rRNA	SRR5826125	PRJNA394057	SAMN07348365	31.15	108.56	Soil metagenome	Wetland, soil	Soil	28229	80	0.00283397
NCBI	16S rRNA	SRR5826124	PRJNA394057	SAMN07348365	31.15	108.56	Soil metagenome	Wetland, soil	Soil	23296	53	0.00227507
NCBI	16S rRNA	SRR5826099	PRJNA394057	SAMN07348365	31.15	108.56	Soil metagenome	Wetland, soil	Soil	31138	128	0.00411073
NCBI	16S rRNA	SRR5826087	PRJNA394057	SAMN07348365	31.15	108.56	Soil metagenome	Wetland, soil	Soil	21531	184	0.00854582
NCBI	16S rRNA	SRR5678519	PRJNA390231	SAMN07224502	N.A.	N.A.	Soil metagenome	Soil	Soil	3716	5	0.00134553
NCBI	16S rRNA	SRR5678518	PRJNA390231	SAMN07224503	N.A.	N.A.	Soil metagenome	Soil	Soil	4579	13	0.00283905
NCBI	16S rRNA	SRR5678515	PRJNA390231	SAMN07224498	N.A.	N.A.	Soil metagenome	Soil	Soil	4159	10	0.00240442
NCBI	16S rRNA	SRR5678512	PRJNA390231	SAMN07224501	N.A.	N.A.	Soil metagenome	Soil	Soil	3992	6	0.00150301
NCBI	16S rRNA	SRR5678508	PRJNA390231	SAMN07224497	N.A.	N.A.	Soil metagenome	Soil	Soil	4245	14	0.003298
NCBI	16S rRNA	SRR5678505	PRJNA390231	SAMN07224508	N.A.	N.A.	Soil metagenome	Soil	Soil	3916	8	0.0020429
NCBI	16S rRNA	SRR5678499	PRJNA390231	SAMN07224480	N.A.	N.A.	Soil metagenome	Soil	Soil	4122	13	0.00315381
NCBI	16S rRNA	SRR5678478	PRJNA390231	SAMN07224485	N.A.	N.A.	Soil metagenome	Soil	Soil	2690	5	0.00185874
NCBI	16S rRNA	SRR5678477	PRJNA390231	SAMN07224484	N.A.	N.A.	Soil metagenome	Soil	Soil	3776	11	0.00291314
NCBI	16S rRNA	SRR5678476	PRJNA390231	SAMN07224487	N.A.	N.A.	Soil metagenome	Soil	Soil	4036	21	0.00520317
NCBI	16S rRNA	SRR5678475	PRJNA390231	SAMN07224486	N.A.	N.A.	Soil metagenome	Soil	Soil	4657	20	0.00429461
NCBI	16S rRNA	SRR5678471	PRJNA390231	SAMN07224492	N.A.	N.A.	Soil metagenome	Soil	Soil	4593	9	0.0019595
NCBI	16S rRNA	SRR5678469	PRJNA390231	SAMN07224507	N.A.	N.A.	Soil metagenome	Soil	Soil	5623	9	0.00160057
NCBI	16S rRNA	SRR5678468	PRJNA390231	SAMN07224506	N.A.	N.A.	Soil metagenome	Soil	Soil	3556	13	0.00365579
NCBI	16S rRNA	SRR5678466	PRJNA390231	SAMN07224505	N.A.	N.A.	Soil metagenome	Soil	Soil	3011	8	0.00265692
NCBI	16S rRNA	SRR5678464	PRJNA390231	SAMN07224479	N.A.	N.A.	Soil metagenome	Soil	Soil	3790	9	0.00237467
NCBI	16S rRNA	SRR5678463	PRJNA390231	SAMN07224478	N.A.	N.A.	Soil metagenome	Soil	Soil	4222	14	0.00331596
NCBI	16S rRNA	SRR5678462	PRJNA390231	SAMN07224481	N.A.	N.A.	Soil metagenome	Soil	Soil	4483	27	0.00602275
NCBI	16S rRNA	SRR5678461	PRJNA390231	SAMN07224504	N.A.	N.A.	Soil metagenome	Soil	Soil	4577	12	0.0026218
NCBI	16S rRNA	SRR5678460	PRJNA390231	SAMN07224475	N.A.	N.A.	Soil metagenome	Soil	Soil	1730	4	0.00231214
NCBI	16S rRNA	SRR5678459	PRJNA390231	SAMN07224474	N.A.	N.A.	Soil metagenome	Soil	Soil	4051	9	0.00222167
NCBI	16S rRNA	SRR5678458	PRJNA390231	SAMN07224477	N.A.	N.A.	Soil metagenome	Soil	Soil	1780	7	0.00393258
NCBI	16S rRNA	SRR5678457	PRJNA390231	SAMN07224476	N.A.	N.A.	Soil metagenome	Soil	Soil	3477	19	0.00546448
NCBI	16S rRNA	SRR5678455	PRJNA390231	SAMN07224483	N.A.	N.A.	Soil metagenome	Soil	Soil	4091	16	0.00391102
NCBI	16S rRNA	SRR5678454	PRJNA390231	SAMN07224482	N.A.	N.A.	Soil metagenome	Soil	Soil	4145	25	0.00603136
NCBI	16S rRNA	SRR5666278	PRJNA390050	SAMN07212355	N.A.	N.A.	Soil metagenome	Soil	Soil	4182	13	0.00310856
NCBI	16S rRNA	SRR5666277	PRJNA390050	SAMN07212356	N.A.	N.A.	Soil metagenome	Soil	Soil	3768	9	0.00238854
NCBI	16S rRNA	SRR5666276	PRJNA390050	SAMN07212357	N.A.	N.A.	Soil metagenome	Soil	Soil	4094	13	0.00317538
NCBI	16S rRNA	SRR5666274	PRJNA390050	SAMN07212351	N.A.	N.A.	Soil metagenome	Soil	Soil	4022	9	0.00223769
NCBI	16S rRNA	SRR5666273	PRJNA390050	SAMN07212352	N.A.	N.A.	Soil metagenome	Soil	Soil	1745	4	0.00229226
NCBI	16S rRNA	SRR5666272	PRJNA390050	SAMN07212353	N.A.	N.A.	Soil metagenome	Soil	Soil	3467	18	0.00519181
NCBI	16S rRNA	SRR5666271	PRJNA390050	SAMN07212354	N.A.	N.A.	Soil metagenome	Soil	Soil	1774	7	0.00394589
NCBI	16S rRNA	SRR5666269	PRJNA390050	SAMN07212359	N.A.	N.A.	Soil metagenome	Soil	Soil	4114	25	0.00607681
NCBI	16S rRNA	SRR5666268	PRJNA390050	SAMN07212360	N.A.	N.A.	Soil metagenome	Soil	Soil	4065	16	0.00393604
NCBI	16S rRNA	SRR5666267	PRJNA390050	SAMN07212358	N.A.	N.A.	Soil metagenome	Soil	Soil	4486	27	0.00601872
NCBI	16S rRNA	SRR5666261	PRJNA390050	SAMN07212385	N.A.	N.A.	Soil metagenome	Soil	Soil	3905	9	0.00230474
NCBI	16S rRNA	SRR5666257	PRJNA390050	SAMN07212381	N.A.	N.A.	Soil metagenome	Soil	Soil	4500	12	0.00266667
NCBI	16S rRNA	SRR5666256	PRJNA390050	SAMN07212382	N.A.	N.A.	Soil metagenome	Soil	Soil	2969	8	0.00269451
NCBI	16S rRNA	SRR5666255	PRJNA390050	SAMN07212383	N.A.	N.A.	Soil metagenome	Soil	Soil	3550	13	0.00366197
NCBI	16S rRNA	SRR5666254	PRJNA390050	SAMN07212384	N.A.	N.A.	Soil metagenome	Soil	Soil	5614	9	0.00160314
NCBI	16S rRNA	SRR5666253	PRJNA390050	SAMN07212367	N.A.	N.A.	Soil metagenome	Soil	Soil	4328	5	0.00115527
NCBI	16S rRNA	SRR5666249	PRJNA390050	SAMN07212363	N.A.	N.A.	Soil metagenome	Soil	Soil	4639	20	0.00431127
NCBI	16S rRNA	SRR5666248	PRJNA390050	SAMN07212364	N.A.	N.A.	Soil metagenome	Soil	Soil	4005	21	0.00524345
NCBI	16S rRNA	SRR5666247	PRJNA390050	SAMN07212361	N.A.	N.A.	Soil metagenome	Soil	Soil	3756	11	0.00292865
NCBI	16S rRNA	SRR5666246	PRJNA390050	SAMN07212362	N.A.	N.A.	Soil metagenome	Soil	Soil	2684	5	0.00186289
NCBI	16S rRNA	SRR5666245	PRJNA390050	SAMN07212369	N.A.	N.A.	Soil metagenome	Soil	Soil	4542	9	0.00198151
NCBI	16S rRNA	SRR5666221	PRJNA390050	SAMN07212374	N.A.	N.A.	Soil metagenome	Soil	Soil	4216	14	0.00332068
NCBI	16S rRNA	SRR5666217	PRJNA390050	SAMN07212378	N.A.	N.A.	Soil metagenome	Soil	Soil	3967	6	0.00151248
NCBI	16S rRNA	SRR5666214	PRJNA390050	SAMN07212375	N.A.	N.A.	Soil metagenome	Soil	Soil	4126	10	0.00242365
NCBI	16S rRNA	SRR5666213	PRJNA390050	SAMN07212380	N.A.	N.A.	Soil metagenome	Soil	Soil	4587	13	0.0028341
NCBI	16S rRNA	SRR5666212	PRJNA390050	SAMN07212379	N.A.	N.A.	Soil metagenome	Soil	Soil	3717	5	0.00134517
NCBI	16S rRNA	SRR5665960	PRJNA390002	SAMN07211957	N.A.	N.A.	Soil metagenome	Soil	Soil	4017	9	0.00224048
NCBI	16S rRNA	SRR5665959	PRJNA390002	SAMN07211958	N.A.	N.A.	Soil metagenome	Soil	Soil	1731	4	0.0023108
NCBI	16S rRNA	SRR5665958	PRJNA390002	SAMN07211959	N.A.	N.A.	Soil metagenome	Soil	Soil	3466	18	0.00519331
NCBI	16S rRNA	SRR5665957	PRJNA390002	SAMN07211960	N.A.	N.A.	Soil metagenome	Soil	Soil	1776	7	0.00394144
NCBI	16S rRNA	SRR5665956	PRJNA390002	SAMN07211961	N.A.	N.A.	Soil metagenome	Soil	Soil	4171	13	0.00311676
NCBI	16S rRNA	SRR5665955	PRJNA390002	SAMN07211962	N.A.	N.A.	Soil metagenome	Soil	Soil	3774	9	0.00238474
NCBI	16S rRNA	SRR5665954	PRJNA390002	SAMN07211963	N.A.	N.A.	Soil metagenome	Soil	Soil	4107	13	0.00316533
NCBI	16S rRNA	SRR5665953	PRJNA390002	SAMN07211964	N.A.	N.A.	Soil metagenome	Soil	Soil	4477	27	0.00603082
NCBI	16S rRNA	SRR5665952	PRJNA390002	SAMN07211965	N.A.	N.A.	Soil metagenome	Soil	Soil	4105	25	0.00609013
NCBI	16S rRNA	SRR5665951	PRJNA390002	SAMN07211966	N.A.	N.A.	Soil metagenome	Soil	Soil	4046	16	0.00395452
NCBI	16S rRNA	SRR5665949	PRJNA390002	SAMN07211989	N.A.	N.A.	Soil metagenome	Soil	Soil	3553	13	0.00365888
NCBI	16S rRNA	SRR5665948	PRJNA390002	SAMN07211984	N.A.	N.A.	Soil metagenome	Soil	Soil	3975	6	0.00150943
NCBI	16S rRNA	SRR5665945	PRJNA390002	SAMN07211981	N.A.	N.A.	Soil metagenome	Soil	Soil	4137	10	0.00241721
NCBI	16S rRNA	SRR5665944	PRJNA390002	SAMN07211980	N.A.	N.A.	Soil metagenome	Soil	Soil	4214	14	0.00332226
NCBI	16S rRNA	SRR5665940	PRJNA390002	SAMN07211986	N.A.	N.A.	Soil metagenome	Soil	Soil	4576	13	0.00284091
NCBI	16S rRNA	SRR5665939	PRJNA390002	SAMN07211985	N.A.	N.A.	Soil metagenome	Soil	Soil	3715	5	0.0013459
NCBI	16S rRNA	SRR5665919	PRJNA390002	SAMN07211987	N.A.	N.A.	Soil metagenome	Soil	Soil	4504	12	0.0026643
NCBI	16S rRNA	SRR5665918	PRJNA390002	SAMN07211988	N.A.	N.A.	Soil metagenome	Soil	Soil	2971	7	0.00235611
NCBI	16S rRNA	SRR5665917	PRJNA390002	SAMN07211975	N.A.	N.A.	Soil metagenome	Soil	Soil	4541	9	0.00198194
NCBI	16S rRNA	SRR5665915	PRJNA390002	SAMN07211991	N.A.	N.A.	Soil metagenome	Soil	Soil	3898	9	0.00230888
NCBI	16S rRNA	SRR5665912	PRJNA390002	SAMN07211990	N.A.	N.A.	Soil metagenome	Soil	Soil	5576	9	0.00161406
NCBI	16S rRNA	SRR5665911	PRJNA390002	SAMN07211969	N.A.	N.A.	Soil metagenome	Soil	Soil	4649	20	0.004302
NCBI	16S rRNA	SRR5665910	PRJNA390002	SAMN07211970	N.A.	N.A.	Soil metagenome	Soil	Soil	4014	21	0.00523169
NCBI	16S rRNA	SRR5665909	PRJNA390002	SAMN07211967	N.A.	N.A.	Soil metagenome	Soil	Soil	3759	11	0.00292631
NCBI	16S rRNA	SRR5665908	PRJNA390002	SAMN07211968	N.A.	N.A.	Soil metagenome	Soil	Soil	2677	5	0.00186776
NCBI	16S rRNA	SRR5665907	PRJNA390002	SAMN07211973	N.A.	N.A.	Soil metagenome	Soil	Soil	4329	5	0.001155
NCBI	16S rRNA	SRR5641195	PRJNA359729	SAMN06198978	31.46	119.85	Aquatic metagenome	Water and surface sediment of tilapia ponds	Freshwater/sediment	8246	9	0.00109144
NCBI	16S rRNA	SRR5641194	PRJNA359729	SAMN06199002	31.46	119.85	Aquatic metagenome	Water and surface sediment of tilapia ponds	Freshwater/sediment	7539	40	0.00530574
NCBI	16S rRNA	SRR5641193	PRJNA359729	SAMN06199003	31.46	119.85	Aquatic metagenome	Water and surface sediment of tilapia ponds	Freshwater/sediment	10213	67	0.00656027
NCBI	16S rRNA	SRR5641192	PRJNA359729	SAMN06198998	31.46	119.85	Aquatic metagenome	Water and surface sediment of tilapia ponds	Freshwater/sediment	11593	35	0.00301906
NCBI	16S rRNA	SRR5641191	PRJNA359729	SAMN06198999	31.46	119.85	Aquatic metagenome	Water and surface sediment of tilapia ponds	Freshwater/sediment	11513	89	0.00773039
NCBI	16S rRNA	SRR5641190	PRJNA359729	SAMN06199000	31.46	119.85	Aquatic metagenome	Water and surface sediment of tilapia ponds	Freshwater/sediment	8847	59	0.00666893
NCBI	16S rRNA	SRR5641189	PRJNA359729	SAMN06199001	31.46	119.85	Aquatic metagenome	Water and surface sediment of tilapia ponds	Freshwater/sediment	6927	19	0.00274289
NCBI	16S rRNA	SRR5641188	PRJNA359729	SAMN06198994	31.46	119.85	Aquatic metagenome	Water and surface sediment of tilapia ponds	Freshwater/sediment	9742	107	0.0109834
NCBI	16S rRNA	SRR5641187	PRJNA359729	SAMN06198995	31.46	119.85	Aquatic metagenome	Water and surface sediment of tilapia ponds	Freshwater/sediment	11568	85	0.00734786
NCBI	16S rRNA	SRR5641186	PRJNA359729	SAMN06198996	31.46	119.85	Aquatic metagenome	Water and surface sediment of tilapia ponds	Freshwater/sediment	9820	58	0.00590631
NCBI	16S rRNA	SRR5641185	PRJNA359729	SAMN06198997	31.46	119.85	Aquatic metagenome	Water and surface sediment of tilapia ponds	Freshwater/sediment	11052	14	0.00126674
NCBI	16S rRNA	SRR5641184	PRJNA359729	SAMN06199006	31.46	119.85	Aquatic metagenome	Water and surface sediment of tilapia ponds	Freshwater/sediment	9153	49	0.00535344
NCBI	16S rRNA	SRR5641182	PRJNA359729	SAMN06199007	31.46	119.85	Aquatic metagenome	Water and surface sediment of tilapia ponds	Freshwater/sediment	9658	30	0.00310623
NCBI	16S rRNA	SRR5641181	PRJNA359729	SAMN06198981	31.46	119.85	Aquatic metagenome	Water and surface sediment of tilapia ponds	Freshwater/sediment	9509	29	0.00304974
NCBI	16S rRNA	SRR5641178	PRJNA359729	SAMN06198974	31.46	119.85	Aquatic metagenome	Water and surface sediment of tilapia ponds	Freshwater/sediment	11460	19	0.00165794
NCBI	16S rRNA	SRR5641175	PRJNA359729	SAMN06198983	31.46	119.85	Aquatic metagenome	Water and surface sediment of tilapia ponds	Freshwater/sediment	14530	24	0.00165175
NCBI	16S rRNA	SRR5641174	PRJNA359729	SAMN06199005	31.46	119.85	Aquatic metagenome	Water and surface sediment of tilapia ponds	Freshwater/sediment	5273	17	0.00322397
NCBI	16S rRNA	SRR5641173	PRJNA359729	SAMN06198982	31.46	119.85	Aquatic metagenome	Water and surface sediment of tilapia ponds	Freshwater/sediment	12406	17	0.0013703
NCBI	16S rRNA	SRR5641172	PRJNA359729	SAMN06199004	31.46	119.85	Aquatic metagenome	Water and surface sediment of tilapia ponds	Freshwater/sediment	8291	77	0.00928718
NCBI	16S rRNA	SRR5641171	PRJNA359729	SAMN06198989	31.46	119.85	Aquatic metagenome	Water and surface sediment of tilapia ponds	Freshwater/sediment	10106	30	0.00296853
NCBI	16S rRNA	SRR5641169	PRJNA359729	SAMN06198991	31.46	119.85	Aquatic metagenome	Water and surface sediment of tilapia ponds	Freshwater/sediment	10663	64	0.00600206
NCBI	16S rRNA	SRR5641168	PRJNA359729	SAMN06198990	31.46	119.85	Aquatic metagenome	Water and surface sediment of tilapia ponds	Freshwater/sediment	10424	34	0.0032617
NCBI	16S rRNA	SRR5641166	PRJNA359729	SAMN06198984	31.46	119.85	Aquatic metagenome	Water and surface sediment of tilapia ponds	Freshwater/sediment	9759	47	0.00481607
NCBI	16S rRNA	SRR5641165	PRJNA359729	SAMN06198987	31.46	119.85	Aquatic metagenome	Water and surface sediment of tilapia ponds	Freshwater/sediment	10411	19	0.00182499
NCBI	16S rRNA	SRR5641163	PRJNA359729	SAMN06198993	31.46	119.85	Aquatic metagenome	Water and surface sediment of tilapia ponds	Freshwater/sediment	12754	66	0.00517485
NCBI	16S rRNA	SRR5641162	PRJNA359729	SAMN06198992	31.46	119.85	Aquatic metagenome	Water and surface sediment of tilapia ponds	Freshwater/sediment	10842	29	0.00267478
NCBI	16S rRNA	SRR5436138	PRJNA382485	SAMN06706893	25.9506	100.1	Soil metagenome	Wetland sediments and soils	Soil	35907	110	0.00306347
NCBI	16S rRNA	SRR5436133	PRJNA382485	SAMN06706890	25.953	100.103	Soil metagenome	Wetland sediments and soils	Soil	29666	41	0.00138205
NCBI	16S rRNA	SRR5436131	PRJNA382485	SAMN06706889	25.9449	100.101	Soil metagenome	Wetland sediments and soils	Soil	31853	297	0.00932408
NCBI	16S rRNA	SRR5436129	PRJNA382485	SAMN06706888	25.9449	100.101	Soil metagenome	Wetland sediments and soils	Soil	24262	42	0.0017311
NCBI	16S rRNA	SRR5436127	PRJNA382485	SAMN06706887	25.9449	100.101	Soil metagenome	Wetland sediments and soils	Soil	34961	553	0.0158176
NCBI	16S rRNA	SRR5436125	PRJNA382485	SAMN06706886	25.9471	100.101	Soil metagenome	Wetland sediments and soils	Soil	36813	763	0.0207264
NCBI	16S rRNA	SRR5436113	PRJNA382485	SAMN06706885	25.9471	100.101	Soil metagenome	Wetland sediments and soils	Soil	25858	36	0.00139222
NCBI	16S rRNA	SRR5436111	PRJNA382485	SAMN06706884	25.9471	100.101	Soil metagenome	Wetland sediments and soils	Soil	29529	934	0.0316299
NCBI	16S rRNA	SRR5436104	PRJNA382485	SAMN06706881	25.948	100.1	Soil metagenome	Wetland sediments and soils	Soil	34108	264	0.00774012
NCBI	16S rRNA	SRR5436083	PRJNA382485	SAMN06706880	25.9495	100.1	Soil metagenome	Wetland sediments and soils	Soil	27535	656	0.0238242
NCBI	16S rRNA	SRR5436002	PRJNA382485	SAMN06706878	25.9495	100.1	Soil metagenome	Wetland sediments and soils	Soil	32387	520	0.0160558
NCBI	16S rRNA	SRR5435999	PRJNA382485	SAMN06706877	25.9515	100.102	Soil metagenome	Wetland sediments and soils	Soil	35390	147	0.00415372
NCBI	16S rRNA	SRR5435998	PRJNA382485	SAMN06706876	25.9515	100.102	Soil metagenome	Wetland sediments and soils	Soil	37291	201	0.00539004
NCBI	16S rRNA	SRR5435993	PRJNA382485	SAMN06706873	25.9516	100.102	Soil metagenome	Wetland sediments and soils	Soil	32995	60	0.00181846
NCBI	16S rRNA	SRR5192264	PRJNA362529	SAMN06241456	14.68	100.28	Soil metagenome	Wetland sediments and soils	Soil	296107	355	0.00119889
NCBI	16S rRNA	SRR5163993	PRJNA360023	SAMN06199444	12.3938	114.9	Marine sediment metagenome	Deep sea sediment	Marine water/sediment	26045	712	0.0273373
NCBI	16S rRNA	SRR5140032	PRJNA359993	SAMN06198789	N.A.	N.A.	Wastewater metagenome	Anaerobe reactor	Anaerobic digester/reactor	45432	5392	0.118683
NCBI	16S rRNA	SRR3944985	PRJNA330881	SAMN05429715	31.77	118.47	Freshwater metagenome	The yangtze river	Freshwater/sediment	99415	226	0.0022733
NCBI	16S rRNA	SRR3944960	PRJNA330881	SAMN05429692	29.74	116	Freshwater metagenome	The yangtze river	Freshwater/sediment	142830	295	0.00206539
NCBI	16S rRNA	SRR3944938	PRJNA330881	SAMN05429672	29.45	113.15	Freshwater metagenome	The yangtze river	Freshwater/sediment	95302	175	0.00183627
NCBI	16S rRNA	SRR3944908	PRJNA330881	SAMN05429897	28.9	105.55	Freshwater metagenome	The yangtze river	Freshwater/sediment	113547	119	0.00104802
NCBI	16S rRNA	SRR3944871	PRJNA330881	SAMN05429863	29.74	116.21	Freshwater metagenome	The yangtze river	Freshwater/sediment	46283	52	0.00112352
NCBI	16S rRNA	SRR3944804	PRJNA330881	SAMN05429803	29.42	113.13	Freshwater metagenome	The yangtze river	Freshwater/sediment	114475	324	0.00283031
NCBI	16S rRNA	SRR3944795	PRJNA330881	SAMN05429795	30.74	111.29	Freshwater metagenome	The yangtze river	Freshwater/sediment	39543	55	0.00139089
NCBI	16S rRNA	SRR3457254	PRJNA317932	SAMN04873955	-13.2964	132.336	Soil metagenome	Soil	Soil	26634	52	0.00195239
NCBI	16S rRNA	SRR3289221	PRJNA315338	SAMN04550823	21.82	112.46	Soil metagenome	Forest soil	Soil	414267	9517	0.0229731
NCBI	16S rRNA	SRR3181942	PRJNA312802	SAMN04506840	44.43	-110.42	Hot springs metagenome	Hot springs	Hot spring/sediment	197899	1636	0.00826684
NCBI	16S rRNA	SRR3134747	PRJNA309736	SAMN04441842	22.25	113.05	Sludge metagenome	Anaerobic digester sludge	Anaerobic digester/reactor	83773	181	0.0021606
NCBI	16S rRNA	SRR3084973	PRJNA307496	SAMN04381888	39.9561	-89.393	Sludge metagenome	Anaerobic digester sludge	Anaerobic digester/reactor	68492	88	0.00128482
NCBI	16S rRNA	SRR3029813	PRJNA280508	SAMN03463686	59.51	18.36	Freshwater sediment metagenome	Lake sediment	Freshwater/sediment	30394	145	0.00477068
NCBI	16S rRNA	SRR2989583	PRJNA302724	SAMN04279000	25.65	100.24	Freshwater sediment metagenome	Lake sediment	Freshwater/sediment	33352	160	0.00479731
NCBI	16S rRNA	SRR2989570	PRJNA302724	SAMN04278999	25.7	100.24	Freshwater sediment metagenome	Lake sediment	Freshwater/sediment	25487	313	0.0122808
NCBI	16S rRNA	SRR2989569	PRJNA302724	SAMN04278998	25.75	100.19	Freshwater sediment metagenome	Lake sediment	Freshwater/sediment	26651	518	0.0194364
NCBI	16S rRNA	SRR2989556	PRJNA302724	SAMN04278997	25.8	100.15	Freshwater sediment metagenome	Lake sediment	Freshwater/sediment	23340	228	0.00976864
NCBI	16S rRNA	SRR2989227	PRJNA302724	SAMN04278996	25.84	100.18	Freshwater sediment metagenome	Lake sediment	Freshwater/sediment	23661	541	0.0228646
NCBI	16S rRNA	SRR2989226	PRJNA302724	SAMN04278995	25.91	100.15	Freshwater sediment metagenome	Lake sediment	Freshwater/sediment	25729	342	0.0132924
NCBI	16S rRNA	SRR2989225	PRJNA302724	SAMN04278994	25.65	100.24	Freshwater sediment metagenome	Lake sediment	Freshwater/sediment	30613	302	0.00986509
NCBI	16S rRNA	SRR2989224	PRJNA302724	SAMN04278993	25.7	100.24	Freshwater sediment metagenome	Lake sediment	Freshwater/sediment	25543	378	0.0147986
NCBI	16S rRNA	SRR2989223	PRJNA302724	SAMN04278992	25.75	100.19	Freshwater sediment metagenome	Lake sediment	Freshwater/sediment	26543	830	0.03127
NCBI	16S rRNA	SRR2989222	PRJNA302724	SAMN04278991	25.8	100.15	Freshwater sediment metagenome	Lake sediment	Freshwater/sediment	28502	265	0.00929759
NCBI	16S rRNA	SRR2989198	PRJNA302724	SAMN04278990	25.84	100.18	Freshwater sediment metagenome	Lake sediment	Freshwater/sediment	22645	602	0.0265842
NCBI	16S rRNA	SRR2989167	PRJNA302724	SAMN04278989	25.91	100.15	Freshwater sediment metagenome	Lake sediment	Freshwater/sediment	25175	603	0.0239523
NCBI	16S rRNA	SRR2989166	PRJNA302724	SAMN04278988	24.72	102.64	Freshwater sediment metagenome	Lake sediment	Freshwater/sediment	22150	166	0.00749436
NCBI	16S rRNA	SRR2989165	PRJNA302724	SAMN04278987	24.75	102.63	Freshwater sediment metagenome	Lake sediment	Freshwater/sediment	27890	433	0.0155253
NCBI	16S rRNA	SRR2989164	PRJNA302724	SAMN04278986	24.77	102.69	Freshwater sediment metagenome	Lake sediment	Freshwater/sediment	26504	208	0.00784787
NCBI	16S rRNA	SRR2989163	PRJNA302724	SAMN04278985	24.86	102.71	Freshwater sediment metagenome	Lake sediment	Freshwater/sediment	26925	180	0.00668524
NCBI	16S rRNA	SRR2989162	PRJNA302724	SAMN04278984	24.89	102.72	Freshwater sediment metagenome	Lake sediment	Freshwater/sediment	25055	213	0.0085013
NCBI	16S rRNA	SRR2989160	PRJNA302724	SAMN04278983	24.93	102.66	Freshwater sediment metagenome	Lake sediment	Freshwater/sediment	20580	126	0.00612245
NCBI	16S rRNA	SRR2989158	PRJNA302724	SAMN04278982	24.72	102.64	Freshwater sediment metagenome	Lake sediment	Freshwater/sediment	22179	93	0.00419316
NCBI	16S rRNA	SRR2989157	PRJNA302724	SAMN04278981	24.75	102.63	Freshwater sediment metagenome	Lake sediment	Freshwater/sediment	23751	223	0.00938908
NCBI	16S rRNA	SRR2989156	PRJNA302724	SAMN04278980	24.77	102.69	Freshwater sediment metagenome	Lake sediment	Freshwater/sediment	17817	130	0.0072964
NCBI	16S rRNA	SRR2989154	PRJNA302724	SAMN04278979	24.86	102.71	Freshwater sediment metagenome	Lake sediment	Freshwater/sediment	26616	215	0.00807785
NCBI	16S rRNA	SRR2989153	PRJNA302724	SAMN04278978	24.89	102.72	Freshwater sediment metagenome	Lake sediment	Freshwater/sediment	27135	190	0.00700203
NCBI	16S rRNA	SRR2989152	PRJNA302724	SAMN04278977	24.93	102.66	Freshwater sediment metagenome	Lake sediment	Freshwater/sediment	30779	185	0.00601059
NCBI	16S rRNA	SRR2971123	PRJNA304206	SAMN04303227	N.A.	N.A.	Freshwater sediment metagenome	Lake sediment	Freshwater/sediment	14820	23	0.00155196
NCBI	16S rRNA	SRR2971121	PRJNA304206	SAMN04303227	N.A.	N.A.	Freshwater sediment metagenome	Lake sediment	Freshwater/sediment	14533	22	0.0015138
NCBI	16S rRNA	SRR2971118	PRJNA304206	SAMN04303226	N.A.	N.A.	Freshwater sediment metagenome	Lake sediment	Freshwater/sediment	7063	12	0.00169899
NCBI	16S rRNA	SRR2971117	PRJNA304206	SAMN04303226	N.A.	N.A.	Freshwater sediment metagenome	Lake sediment	Freshwater/sediment	7108	14	0.00196961
NCBI	16S rRNA	SRR2971110	PRJNA304206	SAMN04303224	N.A.	N.A.	Freshwater sediment metagenome	Lake sediment	Freshwater/sediment	19738	143	0.00724491
NCBI	16S rRNA	SRR2971109	PRJNA304206	SAMN04303224	N.A.	N.A.	Freshwater sediment metagenome	Lake sediment	Freshwater/sediment	19922	136	0.00682662
NCBI	16S rRNA	SRR2971107	PRJNA304206	SAMN04303223	N.A.	N.A.	Freshwater sediment metagenome	Lake sediment	Freshwater/sediment	18511	104	0.00561828
NCBI	16S rRNA	SRR2971105	PRJNA304206	SAMN04303223	N.A.	N.A.	Freshwater sediment metagenome	Lake sediment	Freshwater/sediment	18614	113	0.0060707
NCBI	16S rRNA	SRR2970913	PRJNA304206	SAMN04303222	N.A.	N.A.	Freshwater sediment metagenome	Lake sediment	Freshwater/sediment	11835	22	0.00185889
NCBI	16S rRNA	SRR2970912	PRJNA304206	SAMN04303222	N.A.	N.A.	Freshwater sediment metagenome	Lake sediment	Freshwater/sediment	12171	23	0.00188974
NCBI	16S rRNA	SRR2970899	PRJNA304206	SAMN04303221	N.A.	N.A.	Freshwater sediment metagenome	Lake sediment	Freshwater/sediment	12698	14	0.00110254
NCBI	16S rRNA	SRR2970847	PRJNA304206	SAMN04303220	N.A.	N.A.	Freshwater sediment metagenome	Lake sediment	Freshwater/sediment	15265	40	0.00262037
NCBI	16S rRNA	SRR2970845	PRJNA304206	SAMN04303220	N.A.	N.A.	Freshwater sediment metagenome	Lake sediment	Freshwater/sediment	15300	42	0.0027451
NCBI	16S rRNA	SRR2970829	PRJNA304206	SAMN04303219	N.A.	N.A.	Freshwater sediment metagenome	Lake sediment	Freshwater/sediment	17880	27	0.00151007
NCBI	16S rRNA	SRR2970828	PRJNA304206	SAMN04303219	N.A.	N.A.	Freshwater sediment metagenome	Lake sediment	Freshwater/sediment	17768	30	0.00168843
NCBI	16S rRNA	SRR2970825	PRJNA304206	SAMN04303218	N.A.	N.A.	Freshwater sediment metagenome	Lake sediment	Freshwater/sediment	13406	21	0.00156646
NCBI	16S rRNA	SRR2970824	PRJNA304206	SAMN04303218	N.A.	N.A.	Freshwater sediment metagenome	Lake sediment	Freshwater/sediment	13279	19	0.00143083
NCBI	16S rRNA	SRR2970821	PRJNA304206	SAMN04303217	N.A.	N.A.	Freshwater sediment metagenome	Lake sediment	Freshwater/sediment	8552	35	0.00409261
NCBI	16S rRNA	SRR2970820	PRJNA304206	SAMN04303217	N.A.	N.A.	Freshwater sediment metagenome	Lake sediment	Freshwater/sediment	8831	33	0.00373684
NCBI	16S rRNA	SRR2970816	PRJNA304206	SAMN04303216	N.A.	N.A.	Freshwater sediment metagenome	Lake sediment	Freshwater/sediment	11107	24	0.0021608
NCBI	16S rRNA	SRR2970815	PRJNA304206	SAMN04303216	N.A.	N.A.	Freshwater sediment metagenome	Lake sediment	Freshwater/sediment	11239	27	0.00240235
NCBI	16S rRNA	SRR2970796	PRJNA304206	SAMN04303214	N.A.	N.A.	Freshwater sediment metagenome	Lake sediment	Freshwater/sediment	15405	27	0.00175268
NCBI	16S rRNA	SRR2970795	PRJNA304206	SAMN04303214	N.A.	N.A.	Freshwater sediment metagenome	Lake sediment	Freshwater/sediment	15840	25	0.00157828
NCBI	16S rRNA	SRR2970601	PRJNA304206	SAMN04303213	N.A.	N.A.	Freshwater sediment metagenome	Lake sediment	Freshwater/sediment	19483	40	0.00205307
NCBI	16S rRNA	SRR2970596	PRJNA304206	SAMN04303213	N.A.	N.A.	Freshwater sediment metagenome	Lake sediment	Freshwater/sediment	19627	38	0.00193611
NCBI	16S rRNA	SRR2912890	PRJNA301766	SAMN04256430	52.02	105.5	Sediment metagenome	Lake sediment	Freshwater/sediment	10882	62	0.00569748
NCBI	16S rRNA	SRR2719589	PRJNA299092	SAMN04193518	31	118	Biofilm metagenome	Vegetated sediment bacteria in static water	Freshwater/sediment	12425	13	0.00104628
NCBI	16S rRNA	SRR2568167	PRJNA297940	SAMN04151505	31.3	121.5	Activated sludge metagenome	Activated sludge	Anaerobic digester/reactor	2195	805	0.366743
NCBI	16S rRNA	SRR2568158	PRJNA297940	SAMN04151501	31.3	121.5	Activated sludge metagenome	Activated sludge	Anaerobic digester/reactor	8428	272	0.0322734
NCBI	16S rRNA	SRR2509285	PRJNA271507	SAMN03274749	N.A.	N.A.	Aquatic metagenome	Petroleum reservoir	Petroleum field	2102	11	0.00523311
NCBI	16S rRNA	SRR2509283	PRJNA271507	SAMN03274748	N.A.	N.A.	Aquatic metagenome	Petroleum reservoir	Petroleum field	2687	20	0.00744325
NCBI	16S rRNA	SRR2509282	PRJNA271507	SAMN03274747	N.A.	N.A.	Aquatic metagenome	Petroleum reservoir	Petroleum field	2143	147	0.0685954
NCBI	16S rRNA	SRR2509281	PRJNA271507	SAMN03274746	N.A.	N.A.	Aquatic metagenome	Petroleum reservoir	Petroleum field	2707	3	0.00110824
NCBI	16S rRNA	SRR2509266	PRJNA271507	SAMN03274745	N.A.	N.A.	Aquatic metagenome	Petroleum reservoir	Petroleum field	2237	6	0.00268216
NCBI	16S rRNA	SRR2509173	PRJNA271507	SAMN03274744	N.A.	N.A.	Aquatic metagenome	Petroleum reservoir	Petroleum field	2104	43	0.0204373
NCBI	16S rRNA	SRR2508731	PRJNA271507	SAMN03274736	N.A.	N.A.	Aquatic metagenome	Petroleum reservoir	Petroleum field	2455	10	0.00407332
NCBI	16S rRNA	SRR2508730	PRJNA271507	SAMN03274735	N.A.	N.A.	Aquatic metagenome	Petroleum reservoir	Petroleum field	2329	10	0.00429369
NCBI	16S rRNA	SRR2508727	PRJNA271507	SAMN03274732	N.A.	N.A.	Aquatic metagenome	Petroleum reservoir	Petroleum field	2323	6	0.00258287
NCBI	16S rRNA	SRR2508725	PRJNA271507	SAMN03274730	N.A.	N.A.	Aquatic metagenome	Petroleum reservoir	Petroleum field	3012	209	0.0693891
NCBI	16S rRNA	SRR2508724	PRJNA271507	SAMN03274729	N.A.	N.A.	Aquatic metagenome	Petroleum reservoir	Petroleum field	2499	18	0.00720288
NCBI	16S rRNA	SRR2508722	PRJNA271507	SAMN03274727	N.A.	N.A.	Aquatic metagenome	Petroleum reservoir	Petroleum field	3260	35	0.0107362
NCBI	16S rRNA	SRR2508720	PRJNA271507	SAMN03274725	N.A.	N.A.	Aquatic metagenome	Petroleum reservoir	Petroleum field	2999	38	0.0126709
NCBI	16S rRNA	SRR2508719	PRJNA271507	SAMN03274724	N.A.	N.A.	Aquatic metagenome	Petroleum reservoir	Petroleum field	2366	40	0.0169062
NCBI	16S rRNA	SRR2508718	PRJNA271507	SAMN03274723	N.A.	N.A.	Aquatic metagenome	Petroleum reservoir	Petroleum field	1973	20	0.0101368
NCBI	16S rRNA	SRR2508352	PRJNA271507	SAMN03274720	N.A.	N.A.	Aquatic metagenome	Petroleum reservoir	Petroleum field	1683	47	0.0279263
NCBI	16S rRNA	SRR2508350	PRJNA271507	SAMN03274718	N.A.	N.A.	Aquatic metagenome	Petroleum reservoir	Petroleum field	2895	12	0.00414508
NCBI	16S rRNA	SRR2508348	PRJNA271507	SAMN03274716	N.A.	N.A.	Aquatic metagenome	Petroleum reservoir	Petroleum field	2859	12	0.00419727
NCBI	16S rRNA	SRR2508346	PRJNA271507	SAMN03274715	N.A.	N.A.	Aquatic metagenome	Petroleum reservoir	Petroleum field	2348	11	0.00468484
NCBI	16S rRNA	SRR2480545	PRJNA296488	SAMN04099947	N.A.	N.A.	Freshwater sediment metagenome	Lake sediment	Freshwater/sediment	6466	82	0.0126817
NCBI	16S rRNA	SRR2297189	PRJNA289496	SAMN04037978	60	17.1	Sediment metagenome	Lake sediments	Freshwater/sediment	11602	13	0.0011205
NCBI	16S rRNA	SRR2297187	PRJNA289496	SAMN04037976	60	17.1	Sediment metagenome	Lake sediments	Freshwater/sediment	3712	6	0.00161638
NCBI	16S rRNA	SRR2297184	PRJNA289496	SAMN04037973	60.48	18.03	Sediment metagenome	Lake sediments	Freshwater/sediment	8877	11	0.00123916
NCBI	16S rRNA	SRR2297183	PRJNA289496	SAMN04037972	60.48	18.03	Sediment metagenome	Lake sediments	Freshwater/sediment	34587	43	0.00124324
NCBI	16S rRNA	SRR2297182	PRJNA289496	SAMN04037971	60.48	18.03	Sediment metagenome	Lake sediments	Freshwater/sediment	35496	90	0.0025355
NCBI	16S rRNA	SRR2296256	PRJNA294485	SAMN04026611	23.01	114.1	Sediment metagenome	Wetland, river, sediment	Freshwater/sediment	29802	466	0.0156365
NCBI	16S rRNA	SRR2296255	PRJNA294485	SAMN04026610	23.01	114.1	Sediment metagenome	Wetland, river, sediment	Freshwater/sediment	34779	992	0.028523
NCBI	16S rRNA	SRR2296113	PRJNA294485	SAMN04026608	23.01	114.1	Sediment metagenome	Wetland, river, sediment	Freshwater/sediment	29108	2562	0.088017
NCBI	16S rRNA	SRR2296059	PRJNA294485	SAMN04026607	23.01	114.1	Sediment metagenome	Wetland, river, sediment	Freshwater/sediment	23165	1927	0.0831858
NCBI	16S rRNA	SRR2295972	PRJNA294485	SAMN04026606	23.01	114.1	Sediment metagenome	Wetland, river, sediment	Freshwater/sediment	30740	2132	0.0693559
NCBI	16S rRNA	SRR2295949	PRJNA294485	SAMN04026605	23.01	114.1	Sediment metagenome	Wetland, river, sediment	Freshwater/sediment	30318	1121	0.0369747
NCBI	16S rRNA	SRR2295934	PRJNA294485	SAMN04026609	23.01	114.1	Sediment metagenome	Wetland, river, sediment	Freshwater/sediment	26374	437	0.0165693
NCBI	16S rRNA	SRR2295933	PRJNA294485	SAMN04026604	23.01	114.1	Sediment metagenome	Wetland, river, sediment	Freshwater/sediment	27597	1529	0.0554046
NCBI	16S rRNA	SRR2295932	PRJNA294485	SAMN04026603	23.01	114.1	Sediment metagenome	Wetland, river, sediment	Freshwater/sediment	31445	266	0.00845921
NCBI	16S rRNA	SRR2295913	PRJNA294485	SAMN04026602	23.01	114.1	Sediment metagenome	Wetland, river, sediment	Freshwater/sediment	20755	1105	0.0532402
NCBI	16S rRNA	SRR2295912	PRJNA294485	SAMN04026601	23.01	114.1	Sediment metagenome	Wetland, river, sediment	Freshwater/sediment	33312	749	0.0224844
NCBI	16S rRNA	SRR2295911	PRJNA294485	SAMN04026600	23.01	114.1	Sediment metagenome	Wetland, river, sediment	Freshwater/sediment	25794	679	0.026324
NCBI	16S rRNA	SRR2295153	PRJNA294485	SAMN04026602	23.01	114.1	Sediment metagenome	Wetland, river, sediment	Freshwater/sediment	23800	30	0.0012605
NCBI	16S rRNA	SRR2127277	PRJNA283921	SAMN03892824	30.24	119.56	Sediment metagenome	Pond sediment	Freshwater/sediment	20172	361	0.0178961
NCBI	16S rRNA	SRR2127276	PRJNA283921	SAMN03892823	30.24	119.55	Sediment metagenome	Pond sediment	Freshwater/sediment	23831	195	0.00818262
NCBI	16S rRNA	SRR2127275	PRJNA283921	SAMN03892822	30.24	119.54	Sediment metagenome	Pond sediment	Freshwater/sediment	31017	213	0.0068672
NCBI	16S rRNA	SRR2127269	PRJNA283921	SAMN03892812	24.24	118.04	Sediment metagenome	Pond sediment	Freshwater/sediment	48010	167	0.00347844
NCBI	16S rRNA	SRR2104558	PRJNA289633	SAMN03856498	-2.29	-54.05	Sediment metagenome	Lake sediments from the amazon	Freshwater/sediment	1203	2	0.00166251
NCBI	16S rRNA	SRR2104510	PRJNA289633	SAMN03856468	-2.26	-54.53	Sediment metagenome	Lake sediments from the amazon	Freshwater/sediment	1889	5	0.0026469
NCBI	16S rRNA	SRR2104509	PRJNA289633	SAMN03856466	-2.25	-54.46	Sediment metagenome	Lake sediments from the amazon	Freshwater/sediment	1836	3	0.00163399
NCBI	16S rRNA	SRR2104506	PRJNA289633	SAMN03856464	-2.25	-54.46	Sediment metagenome	Lake sediments from the amazon	Freshwater/sediment	1383	2	0.00144613
NCBI	16S rRNA	SRR2097304	PRJNA289046	SAMN03853701	14.15	121.28	Soil metagenome	Saxnas peat bog soil 22-24 cm depth	Soil	964	3	0.00311203
NCBI	16S rRNA	SRR2072671	PRJNA286090	SAMN03770928	57.2	14.11	Soil metagenome	Saxnas peat bog soil 22-24 cm depth	Soil	633	2	0.00315956
NCBI	16S rRNA	SRR2068833	PRJNA286090	SAMN03770929	57.2	14.11	Soil metagenome	Saxnas peat bog soil 22-24 cm depth	Soil	3778	49	0.0129698
NCBI	16S rRNA	SRR2068829	PRJNA286090	SAMN03770927	57.2	14.11	Soil metagenome	Saxnas peat bog soil 22-24 cm depth	Soil	708	3	0.00423729
NCBI	16S rRNA	SRR2059675	PRJNA286319	SAMN03765502	N.A.	N.A.	Hot springs metagenome	Great boiling spring	Hot spring/sediment	54260	55	0.00101364
NCBI	16S rRNA	SRR2059659	PRJNA286319	SAMN03765488	N.A.	N.A.	Hot springs metagenome	Great boiling spring	Hot spring/sediment	33098	63	0.00190344
NCBI	16S rRNA	SRR2059606	PRJNA286319	SAMN03765440	40.5842	-119.005	Hot springs metagenome	Great boiling spring	Hot spring/sediment	24550	35	0.00142566
NCBI	16S rRNA	SRR2059449	PRJNA286319	SAMN03765437	41.0311	-119.018	Hot springs metagenome	Great boiling spring	Hot spring/sediment	30018	41	0.00136585
NCBI	16S rRNA	SRR2059436	PRJNA286319	SAMN03765417	40.3969	-119.22	Hot springs metagenome	Great boiling spring	Hot spring/sediment	33943	57	0.00167929
NCBI	16S rRNA	SRR2001625	PRJNA282444	SAMN03570114	36.09	120.15	Marine sediment metagenome	Marine sediment	Marine water/sediment	42847	58	0.00135365
NCBI	16S rRNA	SRR1980729	PRJNA281522	SAMN03491461	N.A.	N.A.	Wastewater metagenome	Pta wastewater	Anaerobic digester/reactor	32749	7295	0.222755
NCBI	16S rRNA	SRR1818304	PRJNA276421	SAMN03372573	38.7858	-76.7131	Soil metagenome	Freshwater marsh (soil)	Soil	467420	2928	0.00626417
NCBI	16S rRNA	SRR1805038	PRJNA275176	SAMN03339793	N.A.	N.A.	Sludge metagenome	Anaerobic digester sludge	Anaerobic digester/reactor	1855	34	0.0183288
NCBI	16S rRNA	SRR1805033	PRJNA275176	SAMN03339788	N.A.	N.A.	Sludge metagenome	Anaerobic digester sludge	Anaerobic digester/reactor	3049	14	0.00459167
NCBI	16S rRNA	SRR1805032	PRJNA275176	SAMN03339786	N.A.	N.A.	Sludge metagenome	Anaerobic digester sludge	Anaerobic digester/reactor	2876	67	0.0232962
NCBI	16S rRNA	SRR1805031	PRJNA275176	SAMN03339785	N.A.	N.A.	Sludge metagenome	Anaerobic digester sludge	Anaerobic digester/reactor	3193	63	0.0197307
NCBI	16S rRNA	SRR1805029	PRJNA275176	SAMN03339784	N.A.	N.A.	Sludge metagenome	Anaerobic digester sludge	Anaerobic digester/reactor	2728	3	0.00109971
NCBI	16S rRNA	SRR1805028	PRJNA275176	SAMN03339783	N.A.	N.A.	Sludge metagenome	Anaerobic digester sludge	Anaerobic digester/reactor	2302	80	0.0347524
NCBI	16S rRNA	SRR1795474	PRJNA272661	SAMN03284754	N.A.	N.A.	Sediment metagenome	Methane hydrate- and oil bearing sediments	Petroleum field	47536	908	0.0191013
NCBI	16S rRNA	SRR1784993	PRJNA274316	SAMN03325914	30.04	119.54	Soil metagenome	Soil	Soil	404051	527	0.00130429
NCBI	16S rRNA	SRR1779210	PRJNA272921	SAMN03295505	N.A.	N.A.	Soil metagenome	Soil	Soil	6462	12	0.00185701
NCBI	16S rRNA	SRR1778443	PRJNA272921	SAMN03295511	N.A.	N.A.	Soil metagenome	Soil	Soil	3184	6	0.00188442
NCBI	16S rRNA	SRR1778277	PRJNA272921	SAMN03295506	N.A.	N.A.	Soil metagenome	Soil	Soil	7719	275	0.0356264
NCBI	16S rRNA	SRR1771443	PRJNA268143	SAMN03281097	42.07	2.45	Freshwater metagenome	Lake sediment	Freshwater/sediment	10724	26	0.00242447
NCBI	16S rRNA	SRR1771442	PRJNA268143	SAMN03281096	42.07	2.45	Freshwater metagenome	Lake sediment	Freshwater/sediment	5658	6	0.00106045
NCBI	16S rRNA	SRR1771438	PRJNA268143	SAMN03281092	42.07	2.45	Freshwater metagenome	Lake sediment	Freshwater/sediment	7336	71	0.0096783
NCBI	16S rRNA	SRR1618577	PRJNA264145	SAMN03114875	31	120	Biofilm metagenome	Lake biofilm of graphite felt	Freshwater/sediment	1908	7	0.00366876
NCBI	16S rRNA	SRR1618575	PRJNA264145	SAMN03114874	31	120	Biofilm metagenome	Lake biofilm of graphite felt	Freshwater/sediment	1940	2	0.00103093
NCBI	16S rRNA	SRR1618573	PRJNA264145	SAMN03114873	31	120	Freshwater sediment metagenome	Lake sediment	Freshwater/sediment	4073	133	0.0326541
NCBI	16S rRNA	SRR1618571	PRJNA264145	SAMN03114872	31	120	Freshwater sediment metagenome	Lake sediment	Freshwater/sediment	9574	346	0.0361395
NCBI	16S rRNA	SRR1618569	PRJNA264145	SAMN03114871	31	120	Freshwater sediment metagenome	Lake sediment	Freshwater/sediment	12132	91	0.00750082
NCBI	16S rRNA	SRR1618567	PRJNA264145	SAMN03114870	31	120	Freshwater sediment metagenome	Lake sediment	Freshwater/sediment	4060	100	0.0246305
NCBI	16S rRNA	SRR1618565	PRJNA264145	SAMN03114869	31	120	Freshwater sediment metagenome	Lake sediment	Freshwater/sediment	3555	19	0.00534459
NCBI	16S rRNA	SRR1618563	PRJNA264145	SAMN03114868	31	120	Freshwater sediment metagenome	Lake sediment	Freshwater/sediment	2903	50	0.0172236
NCBI	16S rRNA	SRR1578047	PRJNA261295	SAMN03092779	14.1625	121.26	Soil metagenome	Paddy field soil	Soil	721	1	0.00138696
NCBI	16S rRNA	SRR1578041	PRJNA261295	SAMN03092773	14.1625	121.26	Soil metagenome	Paddy field soil	Soil	542	3	0.00553506
NCBI	16S rRNA	SRR1531773	PRJNA178165	SAMN02947133	N.A.	N.A.	Aquatic metagenome	China: yunnan, tengchong， hot spring	Hot spring/sediment	2928	19	0.00648907
NCBI	16S rRNA	SRR1531771	PRJNA178165	SAMN02947131	N.A.	N.A.	Aquatic metagenome	China: yunnan, tengchong， hot spring	Hot spring/sediment	2365	20	0.00845666
NCBI	16S rRNA	SRR1522046	PRJNA255835	SAMN02929376	51.3333	12.3833	Wastewater metagenome	Wastewater reactor	Anaerobic digester/reactor	13785	595	0.0431629
NCBI	16S rRNA	SRR1522044	PRJNA255835	SAMN02929375	51.3333	12.3833	Wastewater metagenome	Wastewater reactor	Anaerobic digester/reactor	17121	728	0.0425209
NCBI	16S rRNA	SRR1522040	PRJNA255835	SAMN02929374	51.3333	12.3833	Wastewater metagenome	Wastewater reactor	Anaerobic digester/reactor	32238	701	0.0217445
NCBI	16S rRNA	SRR1522035	PRJNA255835	SAMN02929373	51.3333	12.3833	Wastewater metagenome	Wastewater reactor	Anaerobic digester/reactor	36595	255	0.00696817
NCBI	16S rRNA	SRR1522025	PRJNA255835	SAMN02929372	51.3333	12.3833	Wastewater metagenome	Wastewater reactor	Anaerobic digester/reactor	2904	206	0.0709366
NCBI	16S rRNA	SRR1522016	PRJNA255835	SAMN02929371	51.3333	12.3833	Wastewater metagenome	Wastewater reactor	Anaerobic digester/reactor	43225	1403	0.0324581
NCBI	16S rRNA	SRR1518912	PRJNA255371	SAMN02918191	59.2924	18.0142	Freshwater sediment metagenome	Sweden: vallentunasjon lake sediment	Freshwater/sediment	16775	17	0.00101341
NCBI	16S rRNA	SRR1518910	PRJNA255371	SAMN02918191	59.2924	18.0142	Freshwater sediment metagenome	Sweden: vallentunasjon lake sediment	Freshwater/sediment	13280	16	0.00120482
NCBI	16S rRNA	SRR1518909	PRJNA255371	SAMN02918191	59.2924	18.0142	Freshwater sediment metagenome	Sweden: vallentunasjon lake sediment	Freshwater/sediment	17133	23	0.00134244
NCBI	16S rRNA	SRR1518901	PRJNA255371	SAMN02918191	59.2924	18.0142	Freshwater sediment metagenome	Sweden: vallentunasjon lake sediment	Freshwater/sediment	13294	14	0.00105311
NCBI	16S rRNA	SRR1518900	PRJNA255371	SAMN02918191	59.2924	18.0142	Freshwater sediment metagenome	Sweden: vallentunasjon lake sediment	Freshwater/sediment	16562	18	0.00108683
NCBI	16S rRNA	SRR1518899	PRJNA255371	SAMN02918191	59.2924	18.0142	Freshwater sediment metagenome	Sweden: vallentunasjon lake sediment	Freshwater/sediment	16608	19	0.00114403
NCBI	16S rRNA	SRR1518897	PRJNA255371	SAMN02918191	59.2924	18.0142	Freshwater sediment metagenome	Sweden: vallentunasjon lake sediment	Freshwater/sediment	16551	28	0.00169174
NCBI	16S rRNA	SRR1518896	PRJNA255371	SAMN02918191	59.2924	18.0142	Freshwater sediment metagenome	Sweden: vallentunasjon lake sediment	Freshwater/sediment	15200	16	0.00105263
NCBI	16S rRNA	SRR1518894	PRJNA255371	SAMN02918191	59.2924	18.0142	Freshwater sediment metagenome	Sweden: vallentunasjon lake sediment	Freshwater/sediment	14159	23	0.00162441
NCBI	16S rRNA	SRR1518891	PRJNA255371	SAMN02918191	59.2924	18.0142	Freshwater sediment metagenome	Sweden: vallentunasjon lake sediment	Freshwater/sediment	16703	21	0.00125726
NCBI	16S rRNA	SRR1518887	PRJNA255371	SAMN02918191	59.2924	18.0142	Freshwater sediment metagenome	Sweden: vallentunasjon lake sediment	Freshwater/sediment	14790	15	0.0010142
NCBI	16S rRNA	SRR1518885	PRJNA255371	SAMN02918191	59.2924	18.0142	Freshwater sediment metagenome	Sweden: vallentunasjon lake sediment	Freshwater/sediment	17243	23	0.00133387
NCBI	16S rRNA	SRR1518884	PRJNA255371	SAMN02918191	59.2924	18.0142	Freshwater sediment metagenome	Sweden: vallentunasjon lake sediment	Freshwater/sediment	17225	21	0.00121916
NCBI	16S rRNA	SRR1518883	PRJNA255371	SAMN02918191	59.2924	18.0142	Freshwater sediment metagenome	Sweden: vallentunasjon lake sediment	Freshwater/sediment	18511	30	0.00162066
NCBI	16S rRNA	SRR1518882	PRJNA255371	SAMN02918191	59.2924	18.0142	Freshwater sediment metagenome	Sweden: vallentunasjon lake sediment	Freshwater/sediment	18192	29	0.00159411
NCBI	16S rRNA	SRR1518881	PRJNA255371	SAMN02918191	59.2924	18.0142	Freshwater sediment metagenome	Sweden: vallentunasjon lake sediment	Freshwater/sediment	22151	33	0.00148977
NCBI	16S rRNA	SRR1518879	PRJNA255371	SAMN02918191	59.2924	18.0142	Freshwater sediment metagenome	Sweden: vallentunasjon lake sediment	Freshwater/sediment	20636	32	0.00155069
NCBI	16S rRNA	SRR1518878	PRJNA255371	SAMN02918191	59.2924	18.0142	Freshwater sediment metagenome	Sweden: vallentunasjon lake sediment	Freshwater/sediment	18696	21	0.00112323
NCBI	16S rRNA	SRR1518877	PRJNA255371	SAMN02918191	59.2924	18.0142	Freshwater sediment metagenome	Sweden: vallentunasjon lake sediment	Freshwater/sediment	24149	41	0.00169779
NCBI	16S rRNA	SRR1518876	PRJNA255371	SAMN02918191	59.2924	18.0142	Freshwater sediment metagenome	Sweden: vallentunasjon lake sediment	Freshwater/sediment	20506	32	0.00156052
NCBI	16S rRNA	SRR1518875	PRJNA255371	SAMN02918191	59.2924	18.0142	Freshwater sediment metagenome	Sweden: vallentunasjon lake sediment	Freshwater/sediment	20058	23	0.00114667
NCBI	16S rRNA	SRR1518874	PRJNA255371	SAMN02918191	59.2924	18.0142	Freshwater sediment metagenome	Sweden: vallentunasjon lake sediment	Freshwater/sediment	22323	39	0.00174708
NCBI	16S rRNA	SRR1518872	PRJNA255371	SAMN02918191	59.2924	18.0142	Freshwater sediment metagenome	Sweden: vallentunasjon lake sediment	Freshwater/sediment	21690	44	0.00202858
NCBI	16S rRNA	SRR1518871	PRJNA255371	SAMN02918191	59.2924	18.0142	Freshwater sediment metagenome	Sweden: vallentunasjon lake sediment	Freshwater/sediment	22153	39	0.00176048
NCBI	16S rRNA	SRR1518870	PRJNA255371	SAMN02918191	59.2924	18.0142	Freshwater sediment metagenome	Sweden: vallentunasjon lake sediment	Freshwater/sediment	24154	32	0.00132483
NCBI	16S rRNA	SRR1518868	PRJNA255371	SAMN02918191	59.2924	18.0142	Freshwater sediment metagenome	Sweden: vallentunasjon lake sediment	Freshwater/sediment	23283	32	0.00137439
NCBI	16S rRNA	SRR1518833	PRJNA255371	SAMN02918191	59.2924	18.0142	Freshwater sediment metagenome	Sweden: vallentunasjon lake sediment	Freshwater/sediment	7224	8	0.00110742
NCBI	16S rRNA	SRR1518823	PRJNA255371	SAMN02918191	59.2924	18.0142	Freshwater sediment metagenome	Sweden: vallentunasjon lake sediment	Freshwater/sediment	8870	9	0.00101466
NCBI	16S rRNA	SRR1518818	PRJNA255371	SAMN02918191	59.2924	18.0142	Freshwater sediment metagenome	Sweden: vallentunasjon lake sediment	Freshwater/sediment	18246	19	0.00104132
NCBI	16S rRNA	SRR1518816	PRJNA255371	SAMN02918191	59.2924	18.0142	Freshwater sediment metagenome	Sweden: vallentunasjon lake sediment	Freshwater/sediment	4556	7	0.00153644
NCBI	16S rRNA	SRR1518814	PRJNA255371	SAMN02918191	59.2924	18.0142	Freshwater sediment metagenome	Sweden: vallentunasjon lake sediment	Freshwater/sediment	7863	14	0.00178049
NCBI	16S rRNA	SRR1518813	PRJNA255371	SAMN02918191	59.2924	18.0142	Freshwater sediment metagenome	Sweden: vallentunasjon lake sediment	Freshwater/sediment	20576	28	0.00136081
NCBI	16S rRNA	SRR1518812	PRJNA255371	SAMN02918191	59.2924	18.0142	Freshwater sediment metagenome	Sweden: vallentunasjon lake sediment	Freshwater/sediment	16654	22	0.001321
NCBI	16S rRNA	SRR1518811	PRJNA255371	SAMN02918191	59.2924	18.0142	Freshwater sediment metagenome	Sweden: vallentunasjon lake sediment	Freshwater/sediment	20121	30	0.00149098
NCBI	16S rRNA	SRR1518810	PRJNA255371	SAMN02918191	59.2924	18.0142	Freshwater sediment metagenome	Sweden: vallentunasjon lake sediment	Freshwater/sediment	16669	19	0.00113984
NCBI	16S rRNA	SRR1518809	PRJNA255371	SAMN02918191	59.2924	18.0142	Freshwater sediment metagenome	Sweden: vallentunasjon lake sediment	Freshwater/sediment	8668	10	0.00115367
NCBI	16S rRNA	SRR1518808	PRJNA255371	SAMN02918191	59.2924	18.0142	Freshwater sediment metagenome	Sweden: vallentunasjon lake sediment	Freshwater/sediment	18201	25	0.00137355
NCBI	16S rRNA	SRR1518807	PRJNA255371	SAMN02918191	59.2924	18.0142	Freshwater sediment metagenome	Sweden: vallentunasjon lake sediment	Freshwater/sediment	16603	35	0.00210805
NCBI	16S rRNA	SRR1518806	PRJNA255371	SAMN02918191	59.2924	18.0142	Freshwater sediment metagenome	Sweden: vallentunasjon lake sediment	Freshwater/sediment	25335	35	0.00138149
NCBI	16S rRNA	SRR1518804	PRJNA255371	SAMN02918191	59.2924	18.0142	Freshwater sediment metagenome	Sweden: vallentunasjon lake sediment	Freshwater/sediment	20362	25	0.00122778
NCBI	16S rRNA	SRR1518803	PRJNA255371	SAMN02918191	59.2924	18.0142	Freshwater sediment metagenome	Sweden: vallentunasjon lake sediment	Freshwater/sediment	33714	41	0.00121611
NCBI	16S rRNA	SRR1518802	PRJNA255371	SAMN02918191	59.2924	18.0142	Freshwater sediment metagenome	Sweden: vallentunasjon lake sediment	Freshwater/sediment	16758	26	0.0015515
NCBI	16S rRNA	SRR1518800	PRJNA255371	SAMN02918191	59.2924	18.0142	Freshwater sediment metagenome	Sweden: vallentunasjon lake sediment	Freshwater/sediment	27123	40	0.00147476
NCBI	16S rRNA	SRR1518799	PRJNA255371	SAMN02918191	59.2924	18.0142	Freshwater sediment metagenome	Sweden: vallentunasjon lake sediment	Freshwater/sediment	9519	18	0.00189095
NCBI	16S rRNA	SRR1518798	PRJNA255371	SAMN02918191	59.2924	18.0142	Freshwater sediment metagenome	Sweden: vallentunasjon lake sediment	Freshwater/sediment	18569	23	0.00123862
NCBI	16S rRNA	SRR1518797	PRJNA255371	SAMN02918191	59.2924	18.0142	Freshwater sediment metagenome	Sweden: vallentunasjon lake sediment	Freshwater/sediment	11067	16	0.00144574
NCBI	16S rRNA	SRR1518794	PRJNA255371	SAMN02918191	59.2924	18.0142	Freshwater sediment metagenome	Sweden: vallentunasjon lake sediment	Freshwater/sediment	17510	19	0.00108509
NCBI	16S rRNA	SRR1518793	PRJNA255371	SAMN02918191	59.2924	18.0142	Freshwater sediment metagenome	Sweden: vallentunasjon lake sediment	Freshwater/sediment	21990	29	0.00131878
NCBI	16S rRNA	SRR1518792	PRJNA255371	SAMN02918191	59.2924	18.0142	Freshwater sediment metagenome	Sweden: vallentunasjon lake sediment	Freshwater/sediment	18295	34	0.00185843
NCBI	16S rRNA	SRR1518791	PRJNA255371	SAMN02918191	59.2924	18.0142	Freshwater sediment metagenome	Sweden: vallentunasjon lake sediment	Freshwater/sediment	21415	35	0.00163437
NCBI	16S rRNA	SRR1518790	PRJNA255371	SAMN02918191	59.2924	18.0142	Freshwater sediment metagenome	Sweden: vallentunasjon lake sediment	Freshwater/sediment	21739	35	0.00161001
NCBI	16S rRNA	SRR1518789	PRJNA255371	SAMN02918191	59.2924	18.0142	Freshwater sediment metagenome	Sweden: vallentunasjon lake sediment	Freshwater/sediment	14794	16	0.00108152
NCBI	16S rRNA	SRR1518788	PRJNA255371	SAMN02918191	59.2924	18.0142	Freshwater sediment metagenome	Sweden: vallentunasjon lake sediment	Freshwater/sediment	23231	36	0.00154965
NCBI	16S rRNA	SRR1518786	PRJNA255371	SAMN02918191	59.2924	18.0142	Freshwater sediment metagenome	Sweden: vallentunasjon lake sediment	Freshwater/sediment	20625	23	0.00111515
NCBI	16S rRNA	SRR1518784	PRJNA255371	SAMN02918191	59.2924	18.0142	Freshwater sediment metagenome	Sweden: vallentunasjon lake sediment	Freshwater/sediment	7001	10	0.00142837
NCBI	16S rRNA	SRR1518783	PRJNA255371	SAMN02918191	59.2924	18.0142	Freshwater sediment metagenome	Sweden: vallentunasjon lake sediment	Freshwater/sediment	10397	11	0.001058
NCBI	16S rRNA	SRR1518779	PRJNA255371	SAMN02918191	59.2924	18.0142	Freshwater sediment metagenome	Sweden: vallentunasjon lake sediment	Freshwater/sediment	10679	13	0.00121734
NCBI	16S rRNA	SRR1518774	PRJNA255371	SAMN02918191	59.2924	18.0142	Freshwater sediment metagenome	Sweden: vallentunasjon lake sediment	Freshwater/sediment	9331	12	0.00128604
NCBI	16S rRNA	SRR1518773	PRJNA255371	SAMN02918191	59.2924	18.0142	Freshwater sediment metagenome	Sweden: vallentunasjon lake sediment	Freshwater/sediment	9563	10	0.0010457
NCBI	16S rRNA	SRR1518772	PRJNA255371	SAMN02918191	59.2924	18.0142	Freshwater sediment metagenome	Sweden: vallentunasjon lake sediment	Freshwater/sediment	7762	10	0.00128833
NCBI	16S rRNA	SRR1518771	PRJNA255371	SAMN02918191	59.2924	18.0142	Freshwater sediment metagenome	Sweden: vallentunasjon lake sediment	Freshwater/sediment	8632	11	0.00127433
NCBI	16S rRNA	SRR1518767	PRJNA255371	SAMN02918191	59.2924	18.0142	Freshwater sediment metagenome	Sweden: vallentunasjon lake sediment	Freshwater/sediment	9426	10	0.0010609
NCBI	16S rRNA	SRR1518766	PRJNA255371	SAMN02918191	59.2924	18.0142	Freshwater sediment metagenome	Sweden: vallentunasjon lake sediment	Freshwater/sediment	10929	16	0.00146399
NCBI	16S rRNA	SRR1518765	PRJNA255371	SAMN02918191	59.2924	18.0142	Freshwater sediment metagenome	Sweden: vallentunasjon lake sediment	Freshwater/sediment	6542	8	0.00122287
NCBI	16S rRNA	SRR1518764	PRJNA255371	SAMN02918191	59.2924	18.0142	Freshwater sediment metagenome	Sweden: vallentunasjon lake sediment	Freshwater/sediment	20065	33	0.00164465
NCBI	16S rRNA	SRR1518763	PRJNA255371	SAMN02918191	59.2924	18.0142	Freshwater sediment metagenome	Sweden: vallentunasjon lake sediment	Freshwater/sediment	12880	14	0.00108696
NCBI	16S rRNA	SRR1518762	PRJNA255371	SAMN02918191	59.2924	18.0142	Freshwater sediment metagenome	Sweden: vallentunasjon lake sediment	Freshwater/sediment	10951	17	0.00155237
NCBI	16S rRNA	SRR1518761	PRJNA255371	SAMN02918191	59.2924	18.0142	Freshwater sediment metagenome	Sweden: vallentunasjon lake sediment	Freshwater/sediment	18836	22	0.00116798
NCBI	16S rRNA	SRR1518760	PRJNA255371	SAMN02918191	59.2924	18.0142	Freshwater sediment metagenome	Sweden: vallentunasjon lake sediment	Freshwater/sediment	12133	13	0.00107146
NCBI	16S rRNA	SRR1518759	PRJNA255371	SAMN02918191	59.2924	18.0142	Freshwater sediment metagenome	Sweden: vallentunasjon lake sediment	Freshwater/sediment	16021	25	0.00156045
NCBI	16S rRNA	SRR1518758	PRJNA255371	SAMN02918191	59.2924	18.0142	Freshwater sediment metagenome	Sweden: vallentunasjon lake sediment	Freshwater/sediment	24188	37	0.00152968
NCBI	16S rRNA	SRR1518757	PRJNA255371	SAMN02918191	59.2924	18.0142	Freshwater sediment metagenome	Sweden: vallentunasjon lake sediment	Freshwater/sediment	20679	30	0.00145075
NCBI	16S rRNA	SRR1518755	PRJNA255371	SAMN02918191	59.2924	18.0142	Freshwater sediment metagenome	Sweden: vallentunasjon lake sediment	Freshwater/sediment	22860	39	0.00170604
NCBI	16S rRNA	SRR1518753	PRJNA255371	SAMN02918191	59.2924	18.0142	Freshwater sediment metagenome	Sweden: vallentunasjon lake sediment	Freshwater/sediment	10685	12	0.00112307
NCBI	16S rRNA	SRR1518752	PRJNA255371	SAMN02918191	59.2924	18.0142	Freshwater sediment metagenome	Sweden: vallentunasjon lake sediment	Freshwater/sediment	15112	24	0.00158814
NCBI	16S rRNA	SRR1518751	PRJNA255371	SAMN02918191	59.2924	18.0142	Freshwater sediment metagenome	Sweden: vallentunasjon lake sediment	Freshwater/sediment	12940	17	0.00131376
NCBI	16S rRNA	SRR1518750	PRJNA255371	SAMN02918191	59.2924	18.0142	Freshwater sediment metagenome	Sweden: vallentunasjon lake sediment	Freshwater/sediment	15849	23	0.0014512
NCBI	16S rRNA	SRR1518749	PRJNA255371	SAMN02918191	59.2924	18.0142	Freshwater sediment metagenome	Sweden: vallentunasjon lake sediment	Freshwater/sediment	8651	13	0.00150272
NCBI	16S rRNA	SRR1518748	PRJNA255371	SAMN02918191	59.2924	18.0142	Freshwater sediment metagenome	Sweden: vallentunasjon lake sediment	Freshwater/sediment	12656	20	0.00158028
NCBI	16S rRNA	SRR1518747	PRJNA255371	SAMN02918191	59.2924	18.0142	Freshwater sediment metagenome	Sweden: vallentunasjon lake sediment	Freshwater/sediment	12095	13	0.00107482
NCBI	16S rRNA	SRR1518743	PRJNA255371	SAMN02918191	59.2924	18.0142	Freshwater sediment metagenome	Sweden: vallentunasjon lake sediment	Freshwater/sediment	13957	21	0.00150462
NCBI	16S rRNA	SRR1518742	PRJNA255371	SAMN02918191	59.2924	18.0142	Freshwater sediment metagenome	Sweden: vallentunasjon lake sediment	Freshwater/sediment	16430	19	0.00115642
NCBI	16S rRNA	SRR1518741	PRJNA255371	SAMN02918191	59.2924	18.0142	Freshwater sediment metagenome	Sweden: vallentunasjon lake sediment	Freshwater/sediment	19893	22	0.00110592
NCBI	16S rRNA	SRR1518740	PRJNA255371	SAMN02918191	59.2924	18.0142	Freshwater sediment metagenome	Sweden: vallentunasjon lake sediment	Freshwater/sediment	18911	27	0.00142774
NCBI	16S rRNA	SRR1518739	PRJNA255371	SAMN02918191	59.2924	18.0142	Freshwater sediment metagenome	Sweden: vallentunasjon lake sediment	Freshwater/sediment	16078	17	0.00105735
NCBI	16S rRNA	SRR1518738	PRJNA255371	SAMN02918191	59.2924	18.0142	Freshwater sediment metagenome	Sweden: vallentunasjon lake sediment	Freshwater/sediment	15985	18	0.00112606
NCBI	16S rRNA	SRR1518737	PRJNA255371	SAMN02918191	59.2924	18.0142	Freshwater sediment metagenome	Sweden: vallentunasjon lake sediment	Freshwater/sediment	13239	17	0.00128408
NCBI	16S rRNA	SRR1518734	PRJNA255371	SAMN02918191	59.2924	18.0142	Freshwater sediment metagenome	Sweden: vallentunasjon lake sediment	Freshwater/sediment	8994	10	0.00111185
NCBI	16S rRNA	SRR1518733	PRJNA255371	SAMN02918191	59.2924	18.0142	Freshwater sediment metagenome	Sweden: vallentunasjon lake sediment	Freshwater/sediment	9194	10	0.00108767
NCBI	16S rRNA	SRR1518732	PRJNA255371	SAMN02918191	59.2924	18.0142	Freshwater sediment metagenome	Sweden: vallentunasjon lake sediment	Freshwater/sediment	6777	7	0.00103291
NCBI	16S rRNA	SRR1518728	PRJNA255371	SAMN02918191	59.2924	18.0142	Freshwater sediment metagenome	Sweden: vallentunasjon lake sediment	Freshwater/sediment	6886	8	0.00116178
NCBI	16S rRNA	SRR1518727	PRJNA255371	SAMN02918191	59.2924	18.0142	Freshwater sediment metagenome	Sweden: vallentunasjon lake sediment	Freshwater/sediment	7029	10	0.00142268
NCBI	16S rRNA	SRR1518726	PRJNA255371	SAMN02918191	59.2924	18.0142	Freshwater sediment metagenome	Sweden: vallentunasjon lake sediment	Freshwater/sediment	5665	6	0.00105914
NCBI	16S rRNA	SRR1518721	PRJNA255371	SAMN02918191	59.2924	18.0142	Freshwater sediment metagenome	Sweden: vallentunasjon lake sediment	Freshwater/sediment	9271	16	0.00172581
NCBI	16S rRNA	SRR1518717	PRJNA255371	SAMN02918191	59.2924	18.0142	Freshwater sediment metagenome	Sweden: vallentunasjon lake sediment	Freshwater/sediment	7502	13	0.00173287
NCBI	16S rRNA	SRR1518704	PRJNA255371	SAMN02918191	59.2924	18.0142	Freshwater sediment metagenome	Sweden: vallentunasjon lake sediment	Freshwater/sediment	10430	15	0.00143816
NCBI	16S rRNA	SRR1518703	PRJNA255371	SAMN02918191	59.2924	18.0142	Freshwater sediment metagenome	Sweden: vallentunasjon lake sediment	Freshwater/sediment	10236	13	0.00127003
NCBI	16S rRNA	SRR1518696	PRJNA255371	SAMN02918191	59.2924	18.0142	Freshwater sediment metagenome	Sweden: vallentunasjon lake sediment	Freshwater/sediment	10970	18	0.00164084
NCBI	16S rRNA	SRR1518693	PRJNA255371	SAMN02918191	59.2924	18.0142	Freshwater sediment metagenome	Sweden: vallentunasjon lake sediment	Freshwater/sediment	12900	17	0.00131783
NCBI	16S rRNA	SRR1518686	PRJNA255371	SAMN02918191	59.2924	18.0142	Freshwater sediment metagenome	Sweden: vallentunasjon lake sediment	Freshwater/sediment	13579	20	0.00147286
NCBI	16S rRNA	SRR1518685	PRJNA255371	SAMN02918191	59.2924	18.0142	Freshwater sediment metagenome	Sweden: vallentunasjon lake sediment	Freshwater/sediment	14454	17	0.00117615
NCBI	16S rRNA	SRR1518684	PRJNA255371	SAMN02918191	59.2924	18.0142	Freshwater sediment metagenome	Sweden: vallentunasjon lake sediment	Freshwater/sediment	14057	21	0.00149392
NCBI	16S rRNA	SRR1518683	PRJNA255371	SAMN02918191	59.2924	18.0142	Freshwater sediment metagenome	Sweden: vallentunasjon lake sediment	Freshwater/sediment	17334	18	0.00103842
NCBI	16S rRNA	SRR1518682	PRJNA255371	SAMN02918191	59.2924	18.0142	Freshwater sediment metagenome	Sweden: vallentunasjon lake sediment	Freshwater/sediment	13605	20	0.00147005
NCBI	16S rRNA	SRR1518681	PRJNA255371	SAMN02918191	59.2924	18.0142	Freshwater sediment metagenome	Sweden: vallentunasjon lake sediment	Freshwater/sediment	16040	24	0.00149626
NCBI	16S rRNA	SRR1518680	PRJNA255371	SAMN02918191	59.2924	18.0142	Freshwater sediment metagenome	Sweden: vallentunasjon lake sediment	Freshwater/sediment	14536	16	0.00110072
NCBI	16S rRNA	SRR1518679	PRJNA255371	SAMN02918191	59.2924	18.0142	Freshwater sediment metagenome	Sweden: vallentunasjon lake sediment	Freshwater/sediment	18958	32	0.00168794
NCBI	16S rRNA	SRR1518678	PRJNA255371	SAMN02918191	59.2924	18.0142	Freshwater sediment metagenome	Sweden: vallentunasjon lake sediment	Freshwater/sediment	16448	20	0.00121595
NCBI	16S rRNA	SRR1518677	PRJNA255371	SAMN02918191	59.2924	18.0142	Freshwater sediment metagenome	Sweden: vallentunasjon lake sediment	Freshwater/sediment	15670	29	0.00185067
NCBI	16S rRNA	SRR1518676	PRJNA255371	SAMN02918191	59.2924	18.0142	Freshwater sediment metagenome	Sweden: vallentunasjon lake sediment	Freshwater/sediment	17626	26	0.00147509
NCBI	16S rRNA	SRR1518675	PRJNA255371	SAMN02918191	59.2924	18.0142	Freshwater sediment metagenome	Sweden: vallentunasjon lake sediment	Freshwater/sediment	17625	22	0.00124823
NCBI	16S rRNA	SRR1518674	PRJNA255371	SAMN02918191	59.2924	18.0142	Freshwater sediment metagenome	Sweden: vallentunasjon lake sediment	Freshwater/sediment	16781	19	0.00113223
NCBI	16S rRNA	SRR1518673	PRJNA255371	SAMN02918191	59.2924	18.0142	Freshwater sediment metagenome	Sweden: vallentunasjon lake sediment	Freshwater/sediment	17133	18	0.0010506
NCBI	16S rRNA	SRR1518672	PRJNA255371	SAMN02918191	59.2924	18.0142	Freshwater sediment metagenome	Sweden: vallentunasjon lake sediment	Freshwater/sediment	18862	21	0.00111335
NCBI	16S rRNA	SRR1518671	PRJNA255371	SAMN02918191	59.2924	18.0142	Freshwater sediment metagenome	Sweden: vallentunasjon lake sediment	Freshwater/sediment	17172	20	0.00116469
NCBI	16S rRNA	SRR1518670	PRJNA255371	SAMN02918191	59.2924	18.0142	Freshwater sediment metagenome	Sweden: vallentunasjon lake sediment	Freshwater/sediment	17748	29	0.00163399
NCBI	16S rRNA	SRR1514149	PRJNA255063	SAMN02903348	N.A.	N.A.	Soil metagenome	Landfill leachate	Soil	82117	235	0.00286177
NCBI	16S rRNA	SRR1460490	PRJNA251951	SAMN02867814	31.5	120.18	Sediment metagenome	Freshwater lake sediment	Freshwater/sediment	1414	21	0.0148515
NCBI	16S rRNA	SRR1460488	PRJNA251951	SAMN02867813	31.5	120.18	Sediment metagenome	Freshwater lake sediment	Freshwater/sediment	2082	4	0.00192123
NCBI	16S rRNA	SRR1460486	PRJNA251951	SAMN02867812	31.5	120.18	Sediment metagenome	Freshwater lake sediment	Freshwater/sediment	1357	25	0.018423
NCBI	16S rRNA	SRR1460484	PRJNA251951	SAMN02867811	31.5	120.18	Sediment metagenome	Freshwater lake sediment	Freshwater/sediment	1741	10	0.00574383
NCBI	16S rRNA	SRR1460482	PRJNA251951	SAMN02867810	31.5	120.18	Sediment metagenome	Freshwater lake sediment	Freshwater/sediment	2216	44	0.0198556
NCBI	16S rRNA	SRR1460480	PRJNA251951	SAMN02867809	31.5	120.18	Sediment metagenome	Freshwater lake sediment	Freshwater/sediment	1751	38	0.0217019
NCBI	16S rRNA	SRR1460478	PRJNA251951	SAMN02867808	31.5	120.18	Sediment metagenome	Freshwater lake sediment	Freshwater/sediment	1548	15	0.00968992
NCBI	16S rRNA	SRR1265067	PRJNA245382	SAMN02737087	22.44	114	Wastewater metagenome	Anaerobic digester	Anaerobic digester/reactor	1403	49	0.0349252
NCBI	16S rRNA	SRR1265061	PRJNA245382	SAMN02737056	23.13	113.27	Wastewater metagenome	Anaerobic digester	Anaerobic digester/reactor	1017	251	0.246804
NCBI	16S rRNA	SRR1258059	PRJNA227416	SAMN02715745	37.54	118.33	Oil field metagenome	Oilfield, enrichment cultures degrading hydrocarbon	Petroleum field	29060	179	0.00615967
NCBI	16S rRNA	SRR1199205	PRJNA242588	SAMN02649632	52.0167	4.36667	Bioreactor metagenome	Anaerobic full-scale reactor	Anaerobic digester/reactor	10808	84	0.00777202
NCBI	16S rRNA	SRR1187292	PRJNA239777	SAMN02671069	N.A.	N.A.	Sediment metagenome	South hangzhou bay which received the effluent from an industrial park	Anaerobic digester/reactor	3558	5	0.00140528
NCBI	16S rRNA	SRR1187282	PRJNA239777	SAMN02671066	N.A.	N.A.	Sediment metagenome	South hangzhou bay which received the effluent from an industrial park	Anaerobic digester/reactor	7158	10	0.00139704
NCBI	16S rRNA	SRR1187270	PRJNA239777	SAMN02671063	N.A.	N.A.	Sediment metagenome	South hangzhou bay which received the effluent from an industrial park	Anaerobic digester/reactor	9384	28	0.0029838
NCBI	16S rRNA	SRR1187266	PRJNA239777	SAMN02671062	N.A.	N.A.	Sediment metagenome	South hangzhou bay which received the effluent from an industrial park	Anaerobic digester/reactor	9596	135	0.0140684
NCBI	16S rRNA	SRR1181464	PRJNA239749	SAMN02670763	N.A.	N.A.	Activated sludge metagenome	Activated sludge	Anaerobic digester/reactor	3979	166	0.041719
NCBI	16S rRNA	SRR1166563	PRJNA237100	SAMN02614505	23.7006	113.173	Sediment metagenome	The sediments collected from the lower pearl river, its estuary, and coastal south china sea	Freshwater/sediment	3487	48	0.0137654
NCBI	16S rRNA	SRR1166562	PRJNA237100	SAMN02614504	23.1612	112.825	Sediment metagenome	The sediments collected from the lower pearl river, its estuary, and coastal south china sea	Freshwater/sediment	2882	72	0.0249827
NCBI	16S rRNA	SRR1166561	PRJNA237100	SAMN02614503	23.0896	112.963	Sediment metagenome	The sediments collected from the lower pearl river, its estuary, and coastal south china sea	Freshwater/sediment	2500	18	0.0072
NCBI	16S rRNA	SRR1166559	PRJNA237100	SAMN02614502	23.0547	113.16	Sediment metagenome	The sediments collected from the lower pearl river, its estuary, and coastal south china sea	Freshwater/sediment	3084	46	0.0149157
NCBI	16S rRNA	SRR1166558	PRJNA237100	SAMN02614501	22.8739	113.571	Sediment metagenome	The sediments collected from the lower pearl river, its estuary, and coastal south china sea	Freshwater/sediment	2448	8	0.00326797
NCBI	16S rRNA	SRR1159363	PRJNA227416	SAMN02390992	37.54	118.33	Hydrocarbon metagenome	Oilfield, enrichment cultures degrading hydrocarbon	Petroleum field	9503	12	0.00126276
NCBI	16S rRNA	SRR1138530	PRJNA235920	SAMN02592632	22.7893	113.625	Sediment metagenome	Sediment of pearl estuary	Coastal sediment	5899	15	0.0025428
NCBI	16S rRNA	SRR1138408	PRJNA235920	SAMN02592629	23.0764	113.462	Sediment metagenome	Sediment of pearl estuary	Coastal sediment	5467	245	0.0448143
NCBI	16S rRNA	SRR1138407	PRJNA235920	SAMN02592628	23.0764	113.462	Sediment metagenome	Sediment of pearl estuary	Coastal sediment	6013	164	0.0272742
NCBI	16S rRNA	SRR1138406	PRJNA235920	SAMN02592627	23.0764	113.462	Sediment metagenome	Sediment of pearl estuary	Coastal sediment	5523	155	0.0280645
NCBI	16S rRNA	SRR1138405	PRJNA235920	SAMN02592626	23.1144	113.222	Sediment metagenome	Sediment of pearl estuary	Coastal sediment	5913	420	0.0710299
NCBI	16S rRNA	SRR1138404	PRJNA235920	SAMN02592625	23.1144	113.222	Sediment metagenome	Sediment of pearl estuary	Coastal sediment	7228	471	0.0651633
NCBI	16S rRNA	SRR1138403	PRJNA235920	SAMN02592624	23.1144	113.222	Sediment metagenome	Sediment of pearl estuary	Coastal sediment	6180	400	0.0647249
NCBI	16S rRNA	SRR1107422	PRJNA217821	SAMN02341457	59.2833	12	Freshwater sediment metagenome	Sediment samples from different depths in two different boreal lakes in sweden	Freshwater/sediment	11315	28	0.00247459
NCBI	16S rRNA	SRR1107421	PRJNA217821	SAMN02341437	59.2833	12	Freshwater sediment metagenome	Sediment samples from different depths in two different boreal lakes in sweden	Freshwater/sediment	9857	10	0.00101451
NCBI	16S rRNA	SRR1107417	PRJNA217821	SAMN02341565	59.5167	18.033	Freshwater sediment metagenome	Sediment samples from different depths in two different boreal lakes in sweden	Freshwater/sediment	8988	25	0.00278149
NCBI	16S rRNA	SRR1107414	PRJNA217821	SAMN02341562	59.5167	18.033	Freshwater sediment metagenome	Sediment samples from different depths in two different boreal lakes in sweden	Freshwater/sediment	6722	10	0.00148765
NCBI	16S rRNA	SRR1107412	PRJNA217821	SAMN02341559	59.5167	18.033	Freshwater sediment metagenome	Sediment samples from different depths in two different boreal lakes in sweden	Freshwater/sediment	5995	10	0.00166806
NCBI	16S rRNA	SRR1107408	PRJNA217821	SAMN02341549	59.5167	18.033	Freshwater sediment metagenome	Sediment samples from different depths in two different boreal lakes in sweden	Freshwater/sediment	5014	16	0.00319107
NCBI	16S rRNA	SRR1107402	PRJNA217821	SAMN02341502	59.2833	12	Freshwater sediment metagenome	Sediment samples from different depths in two different boreal lakes in sweden	Freshwater/sediment	4749	15	0.00315856
NCBI	16S rRNA	SRR1107401	PRJNA217821	SAMN02341501	59.2833	12	Freshwater sediment metagenome	Sediment samples from different depths in two different boreal lakes in sweden	Freshwater/sediment	5428	14	0.00257922
NCBI	16S rRNA	SRR1107400	PRJNA217821	SAMN02341500	59.2833	12	Freshwater sediment metagenome	Sediment samples from different depths in two different boreal lakes in sweden	Freshwater/sediment	6694	10	0.00149388
NCBI	16S rRNA	SRR1107399	PRJNA217821	SAMN02341499	59.2833	12	Freshwater sediment metagenome	Sediment samples from different depths in two different boreal lakes in sweden	Freshwater/sediment	9057	10	0.00110412
NCBI	16S rRNA	SRR1107397	PRJNA217821	SAMN02341497	59.2833	12	Freshwater sediment metagenome	Sediment samples from different depths in two different boreal lakes in sweden	Freshwater/sediment	6833	19	0.00278062
NCBI	16S rRNA	SRR1107393	PRJNA217821	SAMN02341492	59.2833	12	Freshwater sediment metagenome	Sediment samples from different depths in two different boreal lakes in sweden	Freshwater/sediment	5711	11	0.00192611
NCBI	16S rRNA	SRR1107391	PRJNA217821	SAMN02341483	59.2833	12	Freshwater sediment metagenome	Sediment samples from different depths in two different boreal lakes in sweden	Freshwater/sediment	8224	35	0.00425584
NCBI	16S rRNA	SRR1107390	PRJNA217821	SAMN02341470	59.2833	12	Freshwater sediment metagenome	Sediment samples from different depths in two different boreal lakes in sweden	Freshwater/sediment	3793	4	0.00105457
NCBI	16S rRNA	SRR1107177	PRJNA217821	SAMN02341539	59.5167	18.033	Freshwater sediment metagenome	Sediment samples from different depths in two different boreal lakes in sweden	Freshwater/sediment	4877	16	0.00328071
NCBI	16S rRNA	SRR1107176	PRJNA217821	SAMN02341480	59.2833	12	Freshwater sediment metagenome	Sediment samples from different depths in two different boreal lakes in sweden	Freshwater/sediment	7179	10	0.00139295
NCBI	16S rRNA	SRR1107174	PRJNA217821	SAMN02341476	59.2833	12	Freshwater sediment metagenome	Sediment samples from different depths in two different boreal lakes in sweden	Freshwater/sediment	4482	16	0.00356983
NCBI	16S rRNA	SRR1107172	PRJNA217821	SAMN02341433	59.2833	12	Freshwater sediment metagenome	Sediment samples from different depths in two different boreal lakes in sweden	Freshwater/sediment	5424	19	0.00350295
NCBI	16S rRNA	SRR1107171	PRJNA217821	SAMN02341523	59.5167	18.033	Freshwater sediment metagenome	Sediment samples from different depths in two different boreal lakes in sweden	Freshwater/sediment	4546	17	0.00373955
NCBI	16S rRNA	SRR1107164	PRJNA217821	SAMN02341544	59.5167	18.033	Freshwater sediment metagenome	Sediment samples from different depths in two different boreal lakes in sweden	Freshwater/sediment	4020	5	0.00124378
NCBI	16S rRNA	SRR1107163	PRJNA217821	SAMN02341477	59.2833	12	Freshwater sediment metagenome	Sediment samples from different depths in two different boreal lakes in sweden	Freshwater/sediment	4068	10	0.00245821
NCBI	16S rRNA	SRR1107162	PRJNA217821	SAMN02341455	59.2833	12	Freshwater sediment metagenome	Sediment samples from different depths in two different boreal lakes in sweden	Freshwater/sediment	4585	14	0.00305344
NCBI	16S rRNA	SRR1107161	PRJNA217821	SAMN02341524	59.5167	18.033	Freshwater sediment metagenome	Sediment samples from different depths in two different boreal lakes in sweden	Freshwater/sediment	5465	19	0.00347667
NCBI	16S rRNA	SRR1107160	PRJNA217821	SAMN02341521	59.5167	18.033	Freshwater sediment metagenome	Sediment samples from different depths in two different boreal lakes in sweden	Freshwater/sediment	7337	26	0.00354368
NCBI	16S rRNA	SRR1107155	PRJNA217821	SAMN02341656	59.5167	18.033	Freshwater sediment metagenome	Sediment samples from different depths in two different boreal lakes in sweden	Freshwater/sediment	925	6	0.00648649
NCBI	16S rRNA	SRR1107154	PRJNA217821	SAMN02341699	59.5167	18.033	Freshwater sediment metagenome	Sediment samples from different depths in two different boreal lakes in sweden	Freshwater/sediment	4482	16	0.00356983
NCBI	16S rRNA	SRR1107145	PRJNA217821	SAMN02341714	59.5167	18.033	Freshwater sediment metagenome	Sediment samples from different depths in two different boreal lakes in sweden	Freshwater/sediment	9905	10	0.00100959
NCBI	16S rRNA	SRR1107143	PRJNA217821	SAMN02341701	59.5167	18.033	Freshwater sediment metagenome	Sediment samples from different depths in two different boreal lakes in sweden	Freshwater/sediment	4414	21	0.00475759
NCBI	16S rRNA	SRR1107142	PRJNA217821	SAMN02341700	59.5167	18.033	Freshwater sediment metagenome	Sediment samples from different depths in two different boreal lakes in sweden	Freshwater/sediment	4071	10	0.0024564
NCBI	16S rRNA	SRR1107141	PRJNA217821	SAMN02341698	59.5167	18.033	Freshwater sediment metagenome	Sediment samples from different depths in two different boreal lakes in sweden	Freshwater/sediment	6759	19	0.00281107
NCBI	16S rRNA	SRR1107140	PRJNA217821	SAMN02341697	59.5167	18.033	Freshwater sediment metagenome	Sediment samples from different depths in two different boreal lakes in sweden	Freshwater/sediment	5942	10	0.00168294
NCBI	16S rRNA	SRR1107138	PRJNA217821	SAMN02341675	59.5167	18.033	Freshwater sediment metagenome	Sediment samples from different depths in two different boreal lakes in sweden	Freshwater/sediment	5194	43	0.00827878
NCBI	16S rRNA	SRR1107129	PRJNA217821	SAMN02341688	59.5167	18.033	Freshwater sediment metagenome	Sediment samples from different depths in two different boreal lakes in sweden	Freshwater/sediment	3575	32	0.00895105
NCBI	16S rRNA	SRR1107128	PRJNA217821	SAMN02341661	59.5167	18.033	Freshwater sediment metagenome	Sediment samples from different depths in two different boreal lakes in sweden	Freshwater/sediment	6490	7	0.00107858
NCBI	16S rRNA	SRR1107124	PRJNA217821	SAMN02341684	59.5167	18.033	Freshwater sediment metagenome	Sediment samples from different depths in two different boreal lakes in sweden	Freshwater/sediment	5717	11	0.00192409
NCBI	16S rRNA	SRR1107122	PRJNA217821	SAMN02341607	59.2833	12	Freshwater sediment metagenome	Sediment samples from different depths in two different boreal lakes in sweden	Freshwater/sediment	1531	13	0.00849118
NCBI	16S rRNA	SRR1107120	PRJNA217821	SAMN02341711	59.5167	18.033	Freshwater sediment metagenome	Sediment samples from different depths in two different boreal lakes in sweden	Freshwater/sediment	5466	14	0.00256129
NCBI	16S rRNA	SRR1107118	PRJNA217821	SAMN02341687	59.5167	18.033	Freshwater sediment metagenome	Sediment samples from different depths in two different boreal lakes in sweden	Freshwater/sediment	2423	16	0.00660338
NCBI	16S rRNA	SRR1107116	PRJNA217821	SAMN02341605	59.2833	12	Freshwater sediment metagenome	Sediment samples from different depths in two different boreal lakes in sweden	Freshwater/sediment	6721	10	0.00148787
NCBI	16S rRNA	SRR1107114	PRJNA217821	SAMN02341713	59.5167	18.033	Freshwater sediment metagenome	Sediment samples from different depths in two different boreal lakes in sweden	Freshwater/sediment	4023	5	0.00124285
NCBI	16S rRNA	SRR1107113	PRJNA217821	SAMN02341709	59.5167	18.033	Freshwater sediment metagenome	Sediment samples from different depths in two different boreal lakes in sweden	Freshwater/sediment	4768	15	0.00314597
NCBI	16S rRNA	SRR1107109	PRJNA217821	SAMN02341710	59.5167	18.033	Freshwater sediment metagenome	Sediment samples from different depths in two different boreal lakes in sweden	Freshwater/sediment	11354	28	0.00246609
NCBI	16S rRNA	SRR1107106	PRJNA217821	SAMN02341696	59.5167	18.033	Freshwater sediment metagenome	Sediment samples from different depths in two different boreal lakes in sweden	Freshwater/sediment	6870	10	0.0014556
NCBI	16S rRNA	SRR1107102	PRJNA217821	SAMN02341707	59.5167	18.033	Freshwater sediment metagenome	Sediment samples from different depths in two different boreal lakes in sweden	Freshwater/sediment	9054	10	0.00110448
NCBI	16S rRNA	SRR1107099	PRJNA217821	SAMN02341683	59.5167	18.033	Freshwater sediment metagenome	Sediment samples from different depths in two different boreal lakes in sweden	Freshwater/sediment	6606	16	0.00242204
NCBI	16S rRNA	SRR1107096	PRJNA217821	SAMN02341678	59.5167	18.033	Freshwater sediment metagenome	Sediment samples from different depths in two different boreal lakes in sweden	Freshwater/sediment	1775	17	0.00957746
NCBI	16S rRNA	SRR1107095	PRJNA217821	SAMN02341677	59.5167	18.033	Freshwater sediment metagenome	Sediment samples from different depths in two different boreal lakes in sweden	Freshwater/sediment	7124	10	0.00140371
NCBI	16S rRNA	SRR1107094	PRJNA217821	SAMN02341666	59.5167	18.033	Freshwater sediment metagenome	Sediment samples from different depths in two different boreal lakes in sweden	Freshwater/sediment	3641	19	0.00521835
NCBI	16S rRNA	SRR1107093	PRJNA217821	SAMN02341702	59.5167	18.033	Freshwater sediment metagenome	Sediment samples from different depths in two different boreal lakes in sweden	Freshwater/sediment	4878	16	0.00328003
NCBI	16S rRNA	SRR1107091	PRJNA217821	SAMN02341689	59.5167	18.033	Freshwater sediment metagenome	Sediment samples from different depths in two different boreal lakes in sweden	Freshwater/sediment	2219	11	0.00495719
NCBI	16S rRNA	SRR1107090	PRJNA217821	SAMN02341583	59.2833	12	Freshwater sediment metagenome	Sediment samples from different depths in two different boreal lakes in sweden	Freshwater/sediment	8960	25	0.00279018
NCBI	16S rRNA	SRR1107088	PRJNA217821	SAMN02341606	59.2833	12	Freshwater sediment metagenome	Sediment samples from different depths in two different boreal lakes in sweden	Freshwater/sediment	1146	5	0.004363
NCBI	16S rRNA	SRR1107086	PRJNA217821	SAMN02341659	59.5167	18.033	Freshwater sediment metagenome	Sediment samples from different depths in two different boreal lakes in sweden	Freshwater/sediment	3347	16	0.0047804
NCBI	16S rRNA	SRR1107083	PRJNA217821	SAMN02341668	59.5167	18.033	Freshwater sediment metagenome	Sediment samples from different depths in two different boreal lakes in sweden	Freshwater/sediment	7319	26	0.0035524
NCBI	16S rRNA	SRR1107073	PRJNA217821	SAMN02341660	59.5167	18.033	Freshwater sediment metagenome	Sediment samples from different depths in two different boreal lakes in sweden	Freshwater/sediment	7555	25	0.00330907
NCBI	16S rRNA	SRR1107061	PRJNA217821	SAMN02341670	59.5167	18.033	Freshwater sediment metagenome	Sediment samples from different depths in two different boreal lakes in sweden	Freshwater/sediment	4675	17	0.00363636
NCBI	16S rRNA	SRR1107060	PRJNA217821	SAMN02341579	59.2833	12	Freshwater sediment metagenome	Sediment samples from different depths in two different boreal lakes in sweden	Freshwater/sediment	4671	24	0.00513809
NCBI	16S rRNA	SRR1107059	PRJNA217821	SAMN02341669	59.5167	18.033	Freshwater sediment metagenome	Sediment samples from different depths in two different boreal lakes in sweden	Freshwater/sediment	7580	21	0.00277045
NCBI	16S rRNA	SRR1107058	PRJNA217821	SAMN02341694	59.5167	18.033	Freshwater sediment metagenome	Sediment samples from different depths in two different boreal lakes in sweden	Freshwater/sediment	5337	19	0.00356005
NCBI	16S rRNA	SRR1107057	PRJNA217821	SAMN02341693	59.5167	18.033	Freshwater sediment metagenome	Sediment samples from different depths in two different boreal lakes in sweden	Freshwater/sediment	3828	19	0.00496343
NCBI	16S rRNA	SRR1107056	PRJNA217821	SAMN02341692	59.5167	18.033	Freshwater sediment metagenome	Sediment samples from different depths in two different boreal lakes in sweden	Freshwater/sediment	5464	10	0.00183016
NCBI	16S rRNA	SRR1107055	PRJNA217821	SAMN02341691	59.5167	18.033	Freshwater sediment metagenome	Sediment samples from different depths in two different boreal lakes in sweden	Freshwater/sediment	4994	16	0.00320384
NCBI	16S rRNA	SRR1107054	PRJNA217821	SAMN02341628	59.2833	12	Freshwater sediment metagenome	Sediment samples from different depths in two different boreal lakes in sweden	Freshwater/sediment	11822	15	0.00126882
NCBI	16S rRNA	SRR1107046	PRJNA217821	SAMN02341682	59.5167	18.033	Freshwater sediment metagenome	Sediment samples from different depths in two different boreal lakes in sweden	Freshwater/sediment	4558	14	0.00307152
NCBI	16S rRNA	SRR1107045	PRJNA217821	SAMN02341681	59.5167	18.033	Freshwater sediment metagenome	Sediment samples from different depths in two different boreal lakes in sweden	Freshwater/sediment	6737	37	0.00549206
NCBI	16S rRNA	SRR1107044	PRJNA217821	SAMN02341680	59.5167	18.033	Freshwater sediment metagenome	Sediment samples from different depths in two different boreal lakes in sweden	Freshwater/sediment	2627	10	0.00380662
NCBI	16S rRNA	SRR1107043	PRJNA217821	SAMN02341679	59.5167	18.033	Freshwater sediment metagenome	Sediment samples from different depths in two different boreal lakes in sweden	Freshwater/sediment	5396	19	0.00352113
NCBI	16S rRNA	SRR1107041	PRJNA217821	SAMN02341646	59.5167	18.033	Freshwater sediment metagenome	Sediment samples from different depths in two different boreal lakes in sweden	Freshwater/sediment	9120	13	0.00142544
NCBI	16S rRNA	SRR1107039	PRJNA217821	SAMN02341705	59.5167	18.033	Freshwater sediment metagenome	Sediment samples from different depths in two different boreal lakes in sweden	Freshwater/sediment	5827	30	0.00514845
NCBI	16S rRNA	SRR1107037	PRJNA217821	SAMN02341704	59.5167	18.033	Freshwater sediment metagenome	Sediment samples from different depths in two different boreal lakes in sweden	Freshwater/sediment	7212	36	0.00499168
NCBI	16S rRNA	SRR1107036	PRJNA217821	SAMN02341703	59.5167	18.033	Freshwater sediment metagenome	Sediment samples from different depths in two different boreal lakes in sweden	Freshwater/sediment	4384	18	0.00410584
NCBI	16S rRNA	SRR1107034	PRJNA217821	SAMN02341639	59.2833	12	Freshwater sediment metagenome	Sediment samples from different depths in two different boreal lakes in sweden	Freshwater/sediment	1509	13	0.00861498
NCBI	16S rRNA	SRR1107029	PRJNA217821	SAMN02341635	59.2833	12	Freshwater sediment metagenome	Sediment samples from different depths in two different boreal lakes in sweden	Freshwater/sediment	3806	4	0.00105097
NCBI	16S rRNA	SRR1107018	PRJNA217821	SAMN02341648	59.5167	18.033	Freshwater sediment metagenome	Sediment samples from different depths in two different boreal lakes in sweden	Freshwater/sediment	5015	25	0.00498504
NCBI	16S rRNA	SRR1107017	PRJNA217821	SAMN02341647	59.5167	18.033	Freshwater sediment metagenome	Sediment samples from different depths in two different boreal lakes in sweden	Freshwater/sediment	7485	10	0.00133601
NCBI	16S rRNA	SRR1107016	PRJNA217821	SAMN02341454	59.2833	12	Freshwater sediment metagenome	Sediment samples from different depths in two different boreal lakes in sweden	Freshwater/sediment	4784	16	0.00334448
NCBI	16S rRNA	SRR1107015	PRJNA217821	SAMN02341453	59.2833	12	Freshwater sediment metagenome	Sediment samples from different depths in two different boreal lakes in sweden	Freshwater/sediment	5062	25	0.00493876
NCBI	16S rRNA	SRR1107014	PRJNA217821	SAMN02341452	59.2833	12	Freshwater sediment metagenome	Sediment samples from different depths in two different boreal lakes in sweden	Freshwater/sediment	7381	10	0.00135483
NCBI	16S rRNA	SRR1107013	PRJNA217821	SAMN02341451	59.2833	12	Freshwater sediment metagenome	Sediment samples from different depths in two different boreal lakes in sweden	Freshwater/sediment	9093	13	0.00142967
NCBI	16S rRNA	SRR1106994	PRJNA217821	SAMN02341504	59.5167	18.033	Freshwater sediment metagenome	Sediment samples from different depths in two different boreal lakes in sweden	Freshwater/sediment	7223	36	0.00498408
NCBI	16S rRNA	SRR1106983	PRJNA217821	SAMN02341561	59.5167	18.033	Freshwater sediment metagenome	Sediment samples from different depths in two different boreal lakes in sweden	Freshwater/sediment	6639	16	0.00241
NCBI	16S rRNA	SRR1106982	PRJNA217821	SAMN02341442	59.2833	12	Freshwater sediment metagenome	Sediment samples from different depths in two different boreal lakes in sweden	Freshwater/sediment	4388	18	0.0041021
NCBI	16S rRNA	SRR1106980	PRJNA217821	SAMN02341555	59.5167	18.033	Freshwater sediment metagenome	Sediment samples from different depths in two different boreal lakes in sweden	Freshwater/sediment	6437	7	0.00108746
NCBI	16S rRNA	SRR1106978	PRJNA217821	SAMN02341553	59.5167	18.033	Freshwater sediment metagenome	Sediment samples from different depths in two different boreal lakes in sweden	Freshwater/sediment	2668	7	0.00262369
NCBI	16S rRNA	SRR1106969	PRJNA217821	SAMN02341486	59.2833	12	Freshwater sediment metagenome	Sediment samples from different depths in two different boreal lakes in sweden	Freshwater/sediment	13812	28	0.00202722
NCBI	16S rRNA	SRR1106965	PRJNA217821	SAMN02341478	59.2833	12	Freshwater sediment metagenome	Sediment samples from different depths in two different boreal lakes in sweden	Freshwater/sediment	4417	21	0.00475436
NCBI	16S rRNA	SRR1106950	PRJNA217821	SAMN02341532	59.5167	18.033	Freshwater sediment metagenome	Sediment samples from different depths in two different boreal lakes in sweden	Freshwater/sediment	3708	5	0.00134844
NCBI	16S rRNA	SRR1106944	PRJNA217821	SAMN02341466	59.2833	12	Freshwater sediment metagenome	Sediment samples from different depths in two different boreal lakes in sweden	Freshwater/sediment	4619	24	0.00519593
NCBI	16S rRNA	SRR1106941	PRJNA217821	SAMN02341463	59.2833	12	Freshwater sediment metagenome	Sediment samples from different depths in two different boreal lakes in sweden	Freshwater/sediment	7612	55	0.00722543
NCBI	16S rRNA	SRR1106940	PRJNA217821	SAMN02341462	59.2833	12	Freshwater sediment metagenome	Sediment samples from different depths in two different boreal lakes in sweden	Freshwater/sediment	5837	30	0.00513963
NCBI	16S rRNA	SRR1106936	PRJNA217821	SAMN02341456	59.2833	12	Freshwater sediment metagenome	Sediment samples from different depths in two different boreal lakes in sweden	Freshwater/sediment	5003	16	0.00319808
NCBI	16S rRNA	SRR1106935	PRJNA217821	SAMN02341455	59.2833	12	Freshwater sediment metagenome	Sediment samples from different depths in two different boreal lakes in sweden	Freshwater/sediment	4593	14	0.00304812
NCBI	16S rRNA	SRR1106934	PRJNA217821	SAMN02341433	59.2833	12	Freshwater sediment metagenome	Sediment samples from different depths in two different boreal lakes in sweden	Freshwater/sediment	5295	19	0.00358829
NCBI	16S rRNA	SRR1106933	PRJNA217821	SAMN02341526	59.5167	18.033	Freshwater sediment metagenome	Sediment samples from different depths in two different boreal lakes in sweden	Freshwater/sediment	6738	37	0.00549124
NCBI	16S rRNA	SRR1106932	PRJNA217821	SAMN02341525	59.5167	18.033	Freshwater sediment metagenome	Sediment samples from different depths in two different boreal lakes in sweden	Freshwater/sediment	2599	10	0.00384763
NCBI	16S rRNA	SRR1106931	PRJNA217821	SAMN02341524	59.5167	18.033	Freshwater sediment metagenome	Sediment samples from different depths in two different boreal lakes in sweden	Freshwater/sediment	5399	19	0.00351917
NCBI	16S rRNA	SRR1106930	PRJNA217821	SAMN02341523	59.5167	18.033	Freshwater sediment metagenome	Sediment samples from different depths in two different boreal lakes in sweden	Freshwater/sediment	4767	17	0.00356618
NCBI	16S rRNA	SRR1106929	PRJNA217821	SAMN02341432	59.2833	12	Freshwater sediment metagenome	Sediment samples from different depths in two different boreal lakes in sweden	Freshwater/sediment	3801	19	0.00499868
NCBI	16S rRNA	SRR1106928	PRJNA217821	SAMN02341522	59.5167	18.033	Freshwater sediment metagenome	Sediment samples from different depths in two different boreal lakes in sweden	Freshwater/sediment	7578	21	0.00277118
NCBI	16S rRNA	SRR1106927	PRJNA217821	SAMN02341521	59.5167	18.033	Freshwater sediment metagenome	Sediment samples from different depths in two different boreal lakes in sweden	Freshwater/sediment	7288	26	0.00356751
NCBI	16S rRNA	SRR1106925	PRJNA217821	SAMN02341519	59.5167	18.033	Freshwater sediment metagenome	Sediment samples from different depths in two different boreal lakes in sweden	Freshwater/sediment	7588	25	0.00329468
NCBI	16S rRNA	SRR1106924	PRJNA217821	SAMN02341518	59.5167	18.033	Freshwater sediment metagenome	Sediment samples from different depths in two different boreal lakes in sweden	Freshwater/sediment	3393	16	0.00471559
NCBI	16S rRNA	SRR1106922	PRJNA217821	SAMN02341516	59.5167	18.033	Freshwater sediment metagenome	Sediment samples from different depths in two different boreal lakes in sweden	Freshwater/sediment	3389	6	0.00177043
NCBI	16S rRNA	SRR1045987	PRJNA230888	SAMN02438470	N.A.	N.A.	Bioreactor metagenome	Anaerobic reactor	Anaerobic digester/reactor	53978	73	0.0013524
NCBI	16S rRNA	SRR1024109	PRJNA227416	SAMN02390992	37.54	118.33	Hydrocarbon metagenome	Oilfield, microbiology of anaerobic hydrocarbon degradation	Petroleum field	9485	12	0.00126516
NCBI	16S rRNA	SRR1010970	PRJNA222598	SAMN02371549	N.A.	N.A.	Sediment metagenome	Surface sediment of the norhtern part of chinese marginal seas	Marine water/sediment	5386	13	0.00241367
NCBI	16S rRNA	ERR985493	PRJEB10388	SAMEA3506729	31.445	120.312	Unidentified archaeon	Sediment or freshwater from lake taihu	Freshwater/sediment	36332	2713	0.0746725
NCBI	16S rRNA	ERR985492	PRJEB10388	SAMEA3506728	31.209	120.455	Unidentified archaeon	Sediment or freshwater from lake taihu	Freshwater/sediment	34563	583	0.0168677
NCBI	16S rRNA	ERR985491	PRJEB10388	SAMEA3506727	31.099	120.336	Unidentified archaeon	Sediment or freshwater from lake taihu	Freshwater/sediment	37870	587	0.0155004
NCBI	16S rRNA	ERR985490	PRJEB10388	SAMEA3506726	31.095	120.466	Unidentified archaeon	Sediment or freshwater from lake taihu	Freshwater/sediment	22821	758	0.033215
NCBI	16S rRNA	ERR985489	PRJEB10388	SAMEA3506725	31.016	120.46	Unidentified archaeon	Sediment or freshwater from lake taihu	Freshwater/sediment	30936	695	0.0224657
NCBI	16S rRNA	ERR985488	PRJEB10388	SAMEA3506724	30.963	120.123	Unidentified archaeon	Sediment or freshwater from lake taihu	Freshwater/sediment	31675	353	0.0111444
NCBI	16S rRNA	ERR985487	PRJEB10388	SAMEA3506723	31.242	119.898	Unidentified archaeon	Sediment or freshwater from lake taihu	Freshwater/sediment	21114	529	0.0250545
NCBI	16S rRNA	ERR985486	PRJEB10388	SAMEA3506722	31.326	119.951	Unidentified archaeon	Sediment or freshwater from lake taihu	Freshwater/sediment	34452	441	0.0128004
NCBI	16S rRNA	ERR985485	PRJEB10388	SAMEA3506721	31.395	120.036	Unidentified archaeon	Sediment or freshwater from lake taihu	Freshwater/sediment	34081	36	0.00105631
NCBI	16S rRNA	ERR985484	PRJEB10388	SAMEA3506720	31.504	120.131	Unidentified archaeon	Sediment or freshwater from lake taihu	Freshwater/sediment	29399	1129	0.0384027
NCBI	16S rRNA	ERR985483	PRJEB10388	SAMEA3506719	31.478	120.209	Unidentified archaeon	Sediment or freshwater from lake taihu	Freshwater/sediment	34283	48	0.00140011
NCBI	16S rRNA	ERR985482	PRJEB10387	SAMEA3506718	31.395	120.036	Unidentified archaeon	Sediment or freshwater from lake taihu	Freshwater/sediment	21405	34	0.00158841
NCBI	16S rRNA	ERR788954	PRJEB8765	SAMEA3302568	43.1824	86.227	Aquatic sediment	River water, sediment	Freshwater/sediment	177250	296	0.00166996
NCBI	16S rRNA	ERR490229	PRJEB6160	SAMEA2482258	50.1467	12.4508	Soil metagenome	Wetland soil	Soil	3800	6	0.00157895
NCBI	16S rRNA	ERR3346732	PRJEB28246	SAMEA5669990	33.2236	78.3286	Hot springs metagenome	Hot spring, microbial mat	Hot spring/sediment	56604	128	0.00226132
NCBI	16S rRNA	ERR3346730	PRJEB28246	SAMEA5669988	33.2236	78.3286	Hot springs metagenome	Hot spring, microbial mat	Hot spring/sediment	89028	177	0.00198814
NCBI	16S rRNA	ERR3346728	PRJEB28246	SAMEA5669986	33.2236	78.3286	Hot springs metagenome	Hot spring, microbial mat	Hot spring/sediment	91429	172	0.00188124
NCBI	16S rRNA	ERR3346725	PRJEB28246	SAMEA5669983	33.2236	78.3286	Hot springs metagenome	Hot spring, microbial mat	Hot spring/sediment	71894	73	0.00101538
NCBI	16S rRNA	ERR3291763	PRJEB23384	SAMEA5576368	N.A.	N.A.	Anaerobic digester metagenome	Anaerobic digester	Anaerobic digester/reactor	80605	124	0.00153837
NCBI	16S rRNA	ERR3291742	PRJEB23384	SAMEA5576347	N.A.	N.A.	Anaerobic digester metagenome	Anaerobic digester	Anaerobic digester/reactor	41118	61	0.00148354
NCBI	16S rRNA	ERR2240728	PRJEB24353	SAMEA104460421	N.A.	N.A.	Hot springs metagenome	Geothermal spring water column	Hot spring/sediment	40342	67	0.0016608
NCBI	16S rRNA	ERR2240651	PRJEB24353	SAMEA104460344	N.A.	N.A.	Hot springs metagenome	Geothermal spring water column	Hot spring/sediment	28583	44	0.00153938
NCBI	16S rRNA	ERR2193723	PRJEB23384	SAMEA104372096	N.A.	N.A.	Anaerobic digester metagenome	Anaerobic digester	Anaerobic digester/reactor	26965	73	0.00270721
NCBI	16S rRNA	ERR2119506	PRJEB21670	SAMEA104293533	33	102	Soil metagenome	Mountain meadow soil	Soil	44824	327	0.0072952
NCBI	16S rRNA	ERR2119504	PRJEB21670	SAMEA104293531	33	102	Soil metagenome	Mountain meadow soil	Soil	39414	224	0.00568326
NCBI	16S rRNA	ERR2015296	PRJEB21491	SAMEA104139659	51.6522	-128.13	Soil metagenome	Forest soil	Soil	14802	38	0.00256722
NCBI	16S rRNA	ERR2015294	PRJEB21491	SAMEA104139657	51.6522	-128.13	Soil metagenome	Forest soil	Soil	19615	42	0.00214122
NCBI	16S rRNA	ERR2015275	PRJEB21491	SAMEA104139638	51.6522	-128.13	Soil metagenome	Forest soil	Soil	15983	35	0.00218983
NCBI	16S rRNA	ERR2015261	PRJEB21491	SAMEA104139624	51.6522	-128.13	Soil metagenome	Forest soil	Soil	17376	43	0.00247468
NCBI	16S rRNA	ERR2015167	PRJEB21491	SAMEA104139530	51.6522	-128.13	Soil metagenome	Forest soil	Soil	45381	47	0.00103568
NCBI	16S rRNA	ERR2015164	PRJEB21491	SAMEA104139527	51.6522	-128.13	Soil metagenome	Forest soil	Soil	28397	30	0.00105645
NCBI	16S rRNA	ERR2015098	PRJEB21491	SAMEA104139461	51.6522	-128.13	Soil metagenome	Forest soil	Soil	43576	66	0.0015146
NCBI	16S rRNA	ERR1726499	PRJEB17863	SAMEA4545608	33.1055	102.653	Soil metagenome	Peat	Soil	11856	19	0.00160256
NCBI	16S rRNA	ERR1726498	PRJEB17863	SAMEA4545607	33.1055	102.653	Soil metagenome	Peat	Soil	17588	49	0.00278599
NCBI	16S rRNA	ERR1726495	PRJEB17863	SAMEA4545604	33.1055	102.653	Soil metagenome	Peat	Soil	9953	45	0.00452125
NCBI	16S rRNA	ERR1726494	PRJEB17863	SAMEA4545603	33.1055	102.653	Soil metagenome	Peat	Soil	9875	31	0.00313924
NCBI	16S rRNA	ERR1670382	PRJEB15624	SAMEA4477443	N.A.	N.A.	Metagenome	Digesters and their influent streams	Anaerobic digester/reactor	20141	24	0.0011916
NCBI	16S rRNA	ERR1670381	PRJEB15624	SAMEA4477442	N.A.	N.A.	Metagenome	Digesters and their influent streams	Anaerobic digester/reactor	19209	32	0.00166589
NCBI	16S rRNA	ERR1670380	PRJEB15624	SAMEA4477441	N.A.	N.A.	Metagenome	Digesters and their influent streams	Anaerobic digester/reactor	28607	91	0.00318104
NCBI	16S rRNA	ERR1670379	PRJEB15624	SAMEA4477440	N.A.	N.A.	Metagenome	Digesters and their influent streams	Anaerobic digester/reactor	16382	38	0.00231962
NCBI	16S rRNA	ERR1670378	PRJEB15624	SAMEA4477439	N.A.	N.A.	Metagenome	Digesters and their influent streams	Anaerobic digester/reactor	18940	22	0.00116156
NCBI	16S rRNA	ERR1670377	PRJEB15624	SAMEA4477438	N.A.	N.A.	Metagenome	Digesters and their influent streams	Anaerobic digester/reactor	18969	31	0.00163425
NCBI	16S rRNA	ERR1670376	PRJEB15624	SAMEA4477437	N.A.	N.A.	Metagenome	Digesters and their influent streams	Anaerobic digester/reactor	18324	50	0.00272866
NCBI	16S rRNA	ERR1670375	PRJEB15624	SAMEA4477436	N.A.	N.A.	Metagenome	Digesters and their influent streams	Anaerobic digester/reactor	16166	51	0.00315477
NCBI	16S rRNA	ERR1670374	PRJEB15624	SAMEA4477435	N.A.	N.A.	Metagenome	Digesters and their influent streams	Anaerobic digester/reactor	17697	21	0.00118664
NCBI	16S rRNA	ERR1670373	PRJEB15624	SAMEA4477434	N.A.	N.A.	Metagenome	Digesters and their influent streams	Anaerobic digester/reactor	12435	24	0.00193004
NCBI	16S rRNA	ERR1670372	PRJEB15624	SAMEA4477433	N.A.	N.A.	Metagenome	Digesters and their influent streams	Anaerobic digester/reactor	21596	61	0.0028246
NCBI	16S rRNA	ERR1670371	PRJEB15624	SAMEA4477432	N.A.	N.A.	Metagenome	Digesters and their influent streams	Anaerobic digester/reactor	18013	45	0.0024982
NCBI	16S rRNA	ERR1670370	PRJEB15624	SAMEA4477431	N.A.	N.A.	Metagenome	Digesters and their influent streams	Anaerobic digester/reactor	14293	34	0.00237879
NCBI	16S rRNA	ERR1670369	PRJEB15624	SAMEA4477430	N.A.	N.A.	Metagenome	Digesters and their influent streams	Anaerobic digester/reactor	13511	29	0.0021464
NCBI	16S rRNA	ERR1670368	PRJEB15624	SAMEA4477429	N.A.	N.A.	Metagenome	Digesters and their influent streams	Anaerobic digester/reactor	19671	58	0.0029485
NCBI	16S rRNA	ERR1670366	PRJEB15624	SAMEA4477427	N.A.	N.A.	Metagenome	Digesters and their influent streams	Anaerobic digester/reactor	18252	43	0.00235591
NCBI	16S rRNA	ERR1670365	PRJEB15624	SAMEA4477426	N.A.	N.A.	Metagenome	Digesters and their influent streams	Anaerobic digester/reactor	23378	53	0.00226709
NCBI	16S rRNA	ERR1670364	PRJEB15624	SAMEA4477425	N.A.	N.A.	Metagenome	Digesters and their influent streams	Anaerobic digester/reactor	20578	58	0.00281854
NCBI	16S rRNA	ERR1670363	PRJEB15624	SAMEA4477424	N.A.	N.A.	Metagenome	Digesters and their influent streams	Anaerobic digester/reactor	15059	31	0.00205857
NCBI	16S rRNA	ERR1670362	PRJEB15624	SAMEA4477423	N.A.	N.A.	Metagenome	Digesters and their influent streams	Anaerobic digester/reactor	14986	27	0.00180168
NCBI	16S rRNA	ERR1670361	PRJEB15624	SAMEA4477422	N.A.	N.A.	Metagenome	Digesters and their influent streams	Anaerobic digester/reactor	18731	38	0.00202872
NCBI	16S rRNA	ERR1670360	PRJEB15624	SAMEA4477421	N.A.	N.A.	Metagenome	Digesters and their influent streams	Anaerobic digester/reactor	13831	32	0.00231364
NCBI	16S rRNA	ERR1670359	PRJEB15624	SAMEA4477420	N.A.	N.A.	Metagenome	Digesters and their influent streams	Anaerobic digester/reactor	21108	49	0.00232139
NCBI	16S rRNA	ERR1670357	PRJEB15624	SAMEA4477418	N.A.	N.A.	Metagenome	Digesters and their influent streams	Anaerobic digester/reactor	19837	51	0.00257095
NCBI	16S rRNA	ERR1670356	PRJEB15624	SAMEA4477417	N.A.	N.A.	Metagenome	Digesters and their influent streams	Anaerobic digester/reactor	17366	46	0.00264885
NCBI	16S rRNA	ERR1670355	PRJEB15624	SAMEA4477416	N.A.	N.A.	Metagenome	Digesters and their influent streams	Anaerobic digester/reactor	17661	45	0.00254799
NCBI	16S rRNA	ERR1670354	PRJEB15624	SAMEA4477415	N.A.	N.A.	Metagenome	Digesters and their influent streams	Anaerobic digester/reactor	19900	73	0.00366834
NCBI	16S rRNA	ERR1670352	PRJEB15624	SAMEA4477413	N.A.	N.A.	Metagenome	Digesters and their influent streams	Anaerobic digester/reactor	16580	31	0.00186972
NCBI	16S rRNA	ERR1670351	PRJEB15624	SAMEA4477412	N.A.	N.A.	Metagenome	Digesters and their influent streams	Anaerobic digester/reactor	16865	20	0.00118589
NCBI	16S rRNA	ERR1670350	PRJEB15624	SAMEA4477411	N.A.	N.A.	Metagenome	Digesters and their influent streams	Anaerobic digester/reactor	16009	44	0.00274845
NCBI	16S rRNA	ERR1670349	PRJEB15624	SAMEA4477410	N.A.	N.A.	Metagenome	Digesters and their influent streams	Anaerobic digester/reactor	19302	46	0.00238317
NCBI	16S rRNA	ERR1670348	PRJEB15624	SAMEA4477409	N.A.	N.A.	Metagenome	Digesters and their influent streams	Anaerobic digester/reactor	18692	62	0.00331693
NCBI	16S rRNA	ERR1670346	PRJEB15624	SAMEA4477407	N.A.	N.A.	Metagenome	Digesters and their influent streams	Anaerobic digester/reactor	22125	60	0.00271186
NCBI	16S rRNA	ERR1670345	PRJEB15624	SAMEA4477406	N.A.	N.A.	Metagenome	Digesters and their influent streams	Anaerobic digester/reactor	27368	68	0.00248465
NCBI	16S rRNA	ERR1670344	PRJEB15624	SAMEA4477405	N.A.	N.A.	Metagenome	Digesters and their influent streams	Anaerobic digester/reactor	20919	68	0.00325063
NCBI	16S rRNA	ERR1670340	PRJEB15624	SAMEA4477401	N.A.	N.A.	Metagenome	Digesters and their influent streams	Anaerobic digester/reactor	17664	56	0.00317029
NCBI	16S rRNA	ERR1670339	PRJEB15624	SAMEA4477400	N.A.	N.A.	Metagenome	Digesters and their influent streams	Anaerobic digester/reactor	16554	42	0.00253715
NCBI	16S rRNA	ERR1670338	PRJEB15624	SAMEA4477399	N.A.	N.A.	Metagenome	Digesters and their influent streams	Anaerobic digester/reactor	20413	64	0.00313526
NCBI	16S rRNA	ERR1670337	PRJEB15624	SAMEA4477398	N.A.	N.A.	Metagenome	Digesters and their influent streams	Anaerobic digester/reactor	17291	41	0.00237118
NCBI	16S rRNA	ERR1670335	PRJEB15624	SAMEA4477396	N.A.	N.A.	Metagenome	Digesters and their influent streams	Anaerobic digester/reactor	18525	80	0.00431849
NCBI	16S rRNA	ERR1670334	PRJEB15624	SAMEA4477395	N.A.	N.A.	Metagenome	Digesters and their influent streams	Anaerobic digester/reactor	13625	50	0.00366972
NCBI	16S rRNA	ERR1670333	PRJEB15624	SAMEA4477394	N.A.	N.A.	Metagenome	Digesters and their influent streams	Anaerobic digester/reactor	12720	43	0.0033805
NCBI	16S rRNA	ERR1670332	PRJEB15624	SAMEA4477393	N.A.	N.A.	Metagenome	Digesters and their influent streams	Anaerobic digester/reactor	13200	40	0.0030303
NCBI	16S rRNA	ERR1670331	PRJEB15624	SAMEA4477392	N.A.	N.A.	Metagenome	Digesters and their influent streams	Anaerobic digester/reactor	17469	105	0.00601065
NCBI	16S rRNA	ERR1670330	PRJEB15624	SAMEA4477391	N.A.	N.A.	Metagenome	Digesters and their influent streams	Anaerobic digester/reactor	18550	98	0.00528302
NCBI	16S rRNA	ERR1670329	PRJEB15624	SAMEA4477390	N.A.	N.A.	Metagenome	Digesters and their influent streams	Anaerobic digester/reactor	17229	87	0.00504963
NCBI	16S rRNA	ERR1670324	PRJEB15624	SAMEA4477385	N.A.	N.A.	Metagenome	Digesters and their influent streams	Anaerobic digester/reactor	16352	59	0.00360812
NCBI	16S rRNA	ERR1670301	PRJEB15624	SAMEA4477362	N.A.	N.A.	Metagenome	Digesters and their influent streams	Anaerobic digester/reactor	15068	18	0.00119458
NCBI	16S rRNA	ERR1670300	PRJEB15624	SAMEA4477361	N.A.	N.A.	Metagenome	Digesters and their influent streams	Anaerobic digester/reactor	24529	52	0.00211994
NCBI	16S rRNA	ERR1670299	PRJEB15624	SAMEA4477360	N.A.	N.A.	Metagenome	Digesters and their influent streams	Anaerobic digester/reactor	16314	22	0.00134854
NCBI	16S rRNA	ERR1670231	PRJEB15624	SAMEA4477292	N.A.	N.A.	Metagenome	Digesters and their influent streams	Anaerobic digester/reactor	26912	193	0.00717152
NCBI	16S rRNA	ERR1670230	PRJEB15624	SAMEA4477291	N.A.	N.A.	Metagenome	Digesters and their influent streams	Anaerobic digester/reactor	33471	334	0.00997879
NCBI	16S rRNA	ERR1670224	PRJEB15624	SAMEA4477285	N.A.	N.A.	Metagenome	Digesters and their influent streams	Anaerobic digester/reactor	34671	78	0.00224972
NCBI	16S rRNA	ERR1670223	PRJEB15624	SAMEA4477284	N.A.	N.A.	Metagenome	Digesters and their influent streams	Anaerobic digester/reactor	24567	115	0.00468108
NCBI	16S rRNA	ERR1670195	PRJEB15624	SAMEA4477256	N.A.	N.A.	Metagenome	Digesters and their influent streams	Anaerobic digester/reactor	35046	42	0.00119842
NCBI	16S rRNA	ERR1670190	PRJEB15624	SAMEA4477251	N.A.	N.A.	Metagenome	Digesters and their influent streams	Anaerobic digester/reactor	17560	54	0.00307517
NCBI	16S rRNA	ERR1670189	PRJEB15624	SAMEA4477250	N.A.	N.A.	Metagenome	Digesters and their influent streams	Anaerobic digester/reactor	28007	209	0.00746242
NCBI	16S rRNA	ERR1670178	PRJEB15624	SAMEA4477239	N.A.	N.A.	Metagenome	Digesters and their influent streams	Anaerobic digester/reactor	20386	168	0.00824095
NCBI	16S rRNA	ERR1670177	PRJEB15624	SAMEA4477238	N.A.	N.A.	Metagenome	Digesters and their influent streams	Anaerobic digester/reactor	19825	72	0.00363178
NCBI	16S rRNA	ERR1670176	PRJEB15624	SAMEA4477237	N.A.	N.A.	Metagenome	Digesters and their influent streams	Anaerobic digester/reactor	22742	71	0.00312198
NCBI	16S rRNA	ERR1670164	PRJEB15624	SAMEA4477225	N.A.	N.A.	Metagenome	Digesters and their influent streams	Anaerobic digester/reactor	29018	136	0.00468675
NCBI	16S rRNA	ERR1670163	PRJEB15624	SAMEA4477224	N.A.	N.A.	Metagenome	Digesters and their influent streams	Anaerobic digester/reactor	31472	145	0.00460727
NCBI	16S rRNA	ERR1670151	PRJEB15624	SAMEA4477212	N.A.	N.A.	Metagenome	Digesters and their influent streams	Anaerobic digester/reactor	18087	91	0.00503124
NCBI	16S rRNA	ERR1670150	PRJEB15624	SAMEA4477211	N.A.	N.A.	Metagenome	Digesters and their influent streams	Anaerobic digester/reactor	22365	152	0.00679633
NCBI	16S rRNA	ERR1670149	PRJEB15624	SAMEA4477210	N.A.	N.A.	Metagenome	Digesters and their influent streams	Anaerobic digester/reactor	29014	116	0.00399807
NCBI	16S rRNA	ERR1670141	PRJEB15624	SAMEA4477202	N.A.	N.A.	Metagenome	Digesters and their influent streams	Anaerobic digester/reactor	24157	99	0.00409819
NCBI	16S rRNA	ERR1670140	PRJEB15624	SAMEA4477201	N.A.	N.A.	Metagenome	Digesters and their influent streams	Anaerobic digester/reactor	21717	129	0.00594005
NCBI	16S rRNA	ERR1670128	PRJEB15624	SAMEA4477189	N.A.	N.A.	Metagenome	Digesters and their influent streams	Anaerobic digester/reactor	28199	54	0.00191496
NCBI	16S rRNA	ERR1670118	PRJEB15624	SAMEA4477179	N.A.	N.A.	Metagenome	Digesters and their influent streams	Anaerobic digester/reactor	18673	86	0.00460558
NCBI	16S rRNA	ERR1670117	PRJEB15624	SAMEA4477178	N.A.	N.A.	Metagenome	Digesters and their influent streams	Anaerobic digester/reactor	22791	117	0.00513361
NCBI	16S rRNA	ERR1670110	PRJEB15624	SAMEA4477171	N.A.	N.A.	Metagenome	Digesters and their influent streams	Anaerobic digester/reactor	22728	135	0.00593981
NCBI	16S rRNA	ERR1670109	PRJEB15624	SAMEA4477170	N.A.	N.A.	Metagenome	Digesters and their influent streams	Anaerobic digester/reactor	26069	27	0.00103571
NCBI	16S rRNA	ERR1670108	PRJEB15624	SAMEA4477169	N.A.	N.A.	Metagenome	Digesters and their influent streams	Anaerobic digester/reactor	26568	221	0.00831828
NCBI	16S rRNA	ERR1670107	PRJEB15624	SAMEA4477168	N.A.	N.A.	Metagenome	Digesters and their influent streams	Anaerobic digester/reactor	26070	54	0.00207135
NCBI	16S rRNA	ERR1670106	PRJEB15624	SAMEA4477167	N.A.	N.A.	Metagenome	Digesters and their influent streams	Anaerobic digester/reactor	27488	123	0.00447468
NCBI	16S rRNA	ERR1670105	PRJEB15624	SAMEA4477166	N.A.	N.A.	Metagenome	Digesters and their influent streams	Anaerobic digester/reactor	28939	579	0.0200076
NCBI	16S rRNA	ERR1670104	PRJEB15624	SAMEA4477165	N.A.	N.A.	Metagenome	Digesters and their influent streams	Anaerobic digester/reactor	32183	264	0.00820309
NCBI	16S rRNA	ERR1670103	PRJEB15624	SAMEA4477164	N.A.	N.A.	Metagenome	Digesters and their influent streams	Anaerobic digester/reactor	24709	170	0.00688008
NCBI	16S rRNA	ERR1670102	PRJEB15624	SAMEA4477163	N.A.	N.A.	Metagenome	Digesters and their influent streams	Anaerobic digester/reactor	26305	133	0.00505607
NCBI	16S rRNA	ERR1670101	PRJEB15624	SAMEA4477162	N.A.	N.A.	Metagenome	Digesters and their influent streams	Anaerobic digester/reactor	27772	175	0.00630131
NCBI	16S rRNA	ERR1670086	PRJEB15624	SAMEA4477147	N.A.	N.A.	Metagenome	Digesters and their influent streams	Anaerobic digester/reactor	3159	6	0.00189934
NCBI	16S rRNA	ERR1670085	PRJEB15624	SAMEA4477146	N.A.	N.A.	Metagenome	Digesters and their influent streams	Anaerobic digester/reactor	3147	5	0.00158881
NCBI	16S rRNA	ERR1670084	PRJEB15624	SAMEA4477145	N.A.	N.A.	Metagenome	Digesters and their influent streams	Anaerobic digester/reactor	6321	30	0.00474608
NCBI	16S rRNA	ERR1670083	PRJEB15624	SAMEA4477144	N.A.	N.A.	Metagenome	Digesters and their influent streams	Anaerobic digester/reactor	6731	59	0.00876541
NCBI	16S rRNA	ERR1670039	PRJEB15624	SAMEA4477100	N.A.	N.A.	Metagenome	Digesters and their influent streams	Anaerobic digester/reactor	2534	6	0.0023678
NCBI	16S rRNA	ERR1670037	PRJEB15624	SAMEA4477098	N.A.	N.A.	Metagenome	Digesters and their influent streams	Anaerobic digester/reactor	5661	10	0.00176647
NCBI	16S rRNA	ERR1670031	PRJEB15624	SAMEA4477092	N.A.	N.A.	Metagenome	Digesters and their influent streams	Anaerobic digester/reactor	7150	27	0.00377622
NCBI	16S rRNA	ERR1670019	PRJEB15624	SAMEA4477080	N.A.	N.A.	Metagenome	Digesters and their influent streams	Anaerobic digester/reactor	8336	16	0.00191939
NCBI	16S rRNA	ERR1670017	PRJEB15624	SAMEA4477078	N.A.	N.A.	Metagenome	Digesters and their influent streams	Anaerobic digester/reactor	8054	103	0.0127887
NCBI	16S rRNA	ERR1670016	PRJEB15624	SAMEA4477077	N.A.	N.A.	Metagenome	Digesters and their influent streams	Anaerobic digester/reactor	8108	27	0.00333004
NCBI	16S rRNA	ERR1670001	PRJEB15624	SAMEA4477062	N.A.	N.A.	Metagenome	Digesters and their influent streams	Anaerobic digester/reactor	5330	12	0.00225141
NCBI	16S rRNA	ERR1669989	PRJEB15624	SAMEA4477050	N.A.	N.A.	Metagenome	Digesters and their influent streams	Anaerobic digester/reactor	6318	19	0.00300728
NCBI	16S rRNA	ERR1669982	PRJEB15624	SAMEA4477043	N.A.	N.A.	Metagenome	Digesters and their influent streams	Anaerobic digester/reactor	4802	9	0.00187422
NCBI	16S rRNA	ERR1669974	PRJEB15624	SAMEA4477035	N.A.	N.A.	Metagenome	Digesters and their influent streams	Anaerobic digester/reactor	5184	21	0.00405093
NCBI	16S rRNA	ERR1669973	PRJEB15624	SAMEA4477034	N.A.	N.A.	Metagenome	Digesters and their influent streams	Anaerobic digester/reactor	5374	19	0.00353554
NCBI	16S rRNA	ERR1669947	PRJEB15624	SAMEA4477008	N.A.	N.A.	Metagenome	Digesters and their influent streams	Anaerobic digester/reactor	4294	18	0.0041919
NCBI	16S rRNA	ERR1669942	PRJEB15624	SAMEA4477003	N.A.	N.A.	Metagenome	Digesters and their influent streams	Anaerobic digester/reactor	5410	71	0.0131238
NCBI	16S rRNA	ERR1669936	PRJEB15624	SAMEA4476997	N.A.	N.A.	Metagenome	Digesters and their influent streams	Anaerobic digester/reactor	6176	13	0.00210492
NCBI	16S rRNA	ERR1669935	PRJEB15624	SAMEA4476996	N.A.	N.A.	Metagenome	Digesters and their influent streams	Anaerobic digester/reactor	8445	52	0.00615749
NCBI	16S rRNA	ERR1669934	PRJEB15624	SAMEA4476995	N.A.	N.A.	Metagenome	Digesters and their influent streams	Anaerobic digester/reactor	5916	34	0.00574713
NCBI	16S rRNA	ERR1669933	PRJEB15624	SAMEA4476994	N.A.	N.A.	Metagenome	Digesters and their influent streams	Anaerobic digester/reactor	6224	42	0.00674807
NCBI	16S rRNA	ERR1669923	PRJEB15624	SAMEA4476984	N.A.	N.A.	Metagenome	Digesters and their influent streams	Anaerobic digester/reactor	7666	20	0.00260892
NCBI	16S rRNA	ERR1669920	PRJEB15624	SAMEA4476981	N.A.	N.A.	Metagenome	Digesters and their influent streams	Anaerobic digester/reactor	9298	26	0.0027963
NCBI	16S rRNA	ERR1669918	PRJEB15624	SAMEA4476979	N.A.	N.A.	Metagenome	Digesters and their influent streams	Anaerobic digester/reactor	7375	13	0.00176271
NCBI	16S rRNA	ERR1669917	PRJEB15624	SAMEA4476978	N.A.	N.A.	Metagenome	Digesters and their influent streams	Anaerobic digester/reactor	9052	16	0.00176757
NCBI	16S rRNA	ERR1669913	PRJEB15624	SAMEA4476974	N.A.	N.A.	Metagenome	Digesters and their influent streams	Anaerobic digester/reactor	633	1	0.00157978
NCBI	16S rRNA	ERR1074717	PRJEB11422	SAMEA3610279	48.3333	8.0333	Biogas fermenter metagenome	Biogas reactors	Anaerobic digester/reactor	42841	646	0.015079
NCBI	16S rRNA	DRR119262	PRJDB6599	SAMD00107648	22.4821	31.7177	Fish gut metagenome	Tilapia gut contents	Gut	6531	9	0.00137804
NCBI	16S rRNA	DRR111523	PRJDB6502	SAMD00099692	40.1139	-88.2267	Bioreactor sludge metagenome	Anaerobic bioreactors treating pta wastewater	Anaerobic digester/reactor	45055	177	0.00392853
NCBI	16S rRNA	DRR111520	PRJDB6502	SAMD00099689	40.1139	-88.2267	Bioreactor sludge metagenome	Anaerobic bioreactors treating pta wastewater	Anaerobic digester/reactor	53386	65	0.00121755
NCBI	16S rRNA	DRR111518	PRJDB6502	SAMD00099687	40.1139	-88.2267	Bioreactor sludge metagenome	Anaerobic bioreactors treating pta wastewater	Anaerobic digester/reactor	57274	89	0.00155393
NCBI	16S rRNA	DRR111517	PRJDB6502	SAMD00099686	40.1139	-88.2267	Bioreactor sludge metagenome	Anaerobic bioreactors treating pta wastewater	Anaerobic digester/reactor	47487	300	0.00631752
NCBI	16S rRNA	DRR111516	PRJDB6502	SAMD00099685	40.1139	-88.2267	Bioreactor sludge metagenome	Anaerobic bioreactors treating pta wastewater	Anaerobic digester/reactor	114518	152	0.0013273
NCBI	16S rRNA	DRR111504	PRJDB6502	SAMD00099683	40.1139	-88.2267	Bioreactor sludge metagenome	Anaerobic bioreactors treating pta wastewater	Anaerobic digester/reactor	59404	85	0.00143088
NCBI	16S rRNA	DRR111503	PRJDB6502	SAMD00099682	40.1139	-88.2267	Bioreactor sludge metagenome	Anaerobic bioreactors treating pta wastewater	Anaerobic digester/reactor	56402	78	0.00138293
NCBI	16S rRNA	DRR111502	PRJDB6502	SAMD00099681	40.1139	-88.2267	Bioreactor sludge metagenome	Anaerobic bioreactors treating pta wastewater	Anaerobic digester/reactor	409928	923	0.00225161
NCBI	16S rRNA	DRR111501	PRJDB6502	SAMD00099680	40.1139	-88.2267	Bioreactor sludge metagenome	Anaerobic bioreactors treating pta wastewater	Anaerobic digester/reactor	140446	568	0.00404426
NCBI	16S rRNA	DRR111499	PRJDB6502	SAMD00099678	40.1139	-88.2267	Bioreactor sludge metagenome	Anaerobic bioreactors treating pta wastewater	Anaerobic digester/reactor	46355	52	0.00112178
NCBI	16S rRNA	DRR111498	PRJDB6502	SAMD00099677	40.1139	-88.2267	Bioreactor sludge metagenome	Anaerobic bioreactors treating pta wastewater	Anaerobic digester/reactor	57276	94	0.00164118
NCBI	16S rRNA	DRR111497	PRJDB6502	SAMD00099676	40.1139	-88.2267	Bioreactor sludge metagenome	Anaerobic bioreactors treating pta wastewater	Anaerobic digester/reactor	90301	188	0.00208193
NCBI	16S rRNA	DRR111496	PRJDB6502	SAMD00099675	40.1139	-88.2267	Bioreactor sludge metagenome	Anaerobic bioreactors treating pta wastewater	Anaerobic digester/reactor	308428	1098	0.00355999
NCBI	16S rRNA	DRR111495	PRJDB6502	SAMD00099674	40.1139	-88.2267	Bioreactor sludge metagenome	Anaerobic bioreactors treating pta wastewater	Anaerobic digester/reactor	151262	501	0.00331213
NCBI	16S rRNA	DRR111494	PRJDB6502	SAMD00099673	40.1139	-88.2267	Bioreactor sludge metagenome	Anaerobic bioreactors treating pta wastewater	Anaerobic digester/reactor	383604	1473	0.0038399
NCBI	16S rRNA	DRR111493	PRJDB6502	SAMD00099672	40.1139	-88.2267	Bioreactor sludge metagenome	Anaerobic bioreactors treating pta wastewater	Anaerobic digester/reactor	145920	401	0.00274808
NCBI	16S rRNA	DRR111492	PRJDB6502	SAMD00099671	40.1139	-88.2267	Bioreactor sludge metagenome	Anaerobic bioreactors treating pta wastewater	Anaerobic digester/reactor	366339	1217	0.00332206
NCBI	16S rRNA	DRR111491	PRJDB6502	SAMD00099670	40.1139	-88.2267	Bioreactor sludge metagenome	Anaerobic bioreactors treating pta wastewater	Anaerobic digester/reactor	342932	1131	0.00329803
NCBI	16S rRNA	DRR111490	PRJDB6502	SAMD00099669	40.1139	-88.2267	Bioreactor sludge metagenome	Anaerobic bioreactors treating pta wastewater	Anaerobic digester/reactor	417661	1576	0.0037734
NCBI	16S rRNA	DRR111489	PRJDB6502	SAMD00099668	40.1139	-88.2267	Bioreactor sludge metagenome	Anaerobic bioreactors treating pta wastewater	Anaerobic digester/reactor	147454	490	0.00332307
NCBI	16S rRNA	DRR111479	PRJDB6502	SAMD00099658	40.1139	-88.2267	Bioreactor sludge metagenome	Anaerobic bioreactors treating pta wastewater	Anaerobic digester/reactor	139946	164	0.00117188
NCBI	16S rRNA	DRR111478	PRJDB6502	SAMD00099657	40.1139	-88.2267	Bioreactor sludge metagenome	Anaerobic bioreactors treating pta wastewater	Anaerobic digester/reactor	48608	560	0.0115207
NCBI	16S rRNA	DRR111477	PRJDB6502	SAMD00099656	40.1139	-88.2267	Bioreactor sludge metagenome	Anaerobic bioreactors treating pta wastewater	Anaerobic digester/reactor	48527	428	0.00881983
NCBI	16S rRNA	DRR111476	PRJDB6502	SAMD00099655	40.1139	-88.2267	Bioreactor sludge metagenome	Anaerobic bioreactors treating pta wastewater	Anaerobic digester/reactor	46940	430	0.00916063
NCBI	16S rRNA	DRR111475	PRJDB6502	SAMD00099654	40.1139	-88.2267	Bioreactor sludge metagenome	Anaerobic bioreactors treating pta wastewater	Anaerobic digester/reactor	151447	1977	0.0130541
NCBI	16S rRNA	DRR111474	PRJDB6502	SAMD00099653	40.1139	-88.2267	Bioreactor sludge metagenome	Anaerobic bioreactors treating pta wastewater	Anaerobic digester/reactor	159828	2171	0.0135834
NCBI	16S rRNA	DRR111473	PRJDB6502	SAMD00099652	40.1139	-88.2267	Bioreactor sludge metagenome	Anaerobic bioreactors treating pta wastewater	Anaerobic digester/reactor	139715	1952	0.0139713
NCBI	16S rRNA	DRR075969	PRJDB4560	SAMD00066001	31.6582	131.385	Groundwater metagenome	Groundwater	Groundwater	70174	108	0.00153903
NCBI	16S rRNA	DRR069335	PRJDB5140	SAMD00060004	38.88	-77.02	Sludge metagenome	Wastewater treatment sludges	Anaerobic digester/reactor	90605	304	0.00335522
NCBI	16S rRNA	DRR069334	PRJDB5140	SAMD00060003	38.88	-77.02	Sludge metagenome	Wastewater treatment sludges	Anaerobic digester/reactor	85439	170	0.00198972
NCBI	16S rRNA	DRR069333	PRJDB5140	SAMD00060002	38.88	-77.02	Sludge metagenome	Wastewater treatment sludges	Anaerobic digester/reactor	83176	195	0.00234443
NCBI	16S rRNA	DRR069332	PRJDB5140	SAMD00060001	38.88	-77.02	Sludge metagenome	Wastewater treatment sludges	Anaerobic digester/reactor	88900	149	0.00167604
NCBI	16S rRNA	DRR069331	PRJDB5140	SAMD00060000	38.88	-77.02	Sludge metagenome	Wastewater treatment sludges	Anaerobic digester/reactor	98251	127	0.00129261
NCBI	16S rRNA	DRR069330	PRJDB5140	SAMD00059999	38.88	-77.02	Sludge metagenome	Wastewater treatment sludges	Anaerobic digester/reactor	103512	143	0.00138148
NCBI	16S rRNA	DRR069329	PRJDB5140	SAMD00059998	38.88	-77.02	Sludge metagenome	Wastewater treatment sludges	Anaerobic digester/reactor	75298	83	0.00110229
NCBI	16S rRNA	DRR069328	PRJDB5140	SAMD00059997	38.88	-77.02	Sludge metagenome	Wastewater treatment sludges	Anaerobic digester/reactor	90715	278	0.00306454
NCBI	16S rRNA	DRR069327	PRJDB5140	SAMD00059996	38.88	-77.02	Sludge metagenome	Wastewater treatment sludges	Anaerobic digester/reactor	80750	318	0.00393808
NCBI	16S rRNA	DRR069326	PRJDB5140	SAMD00059995	38.88	-77.02	Sludge metagenome	Wastewater treatment sludges	Anaerobic digester/reactor	92214	168	0.00182185
NCBI	16S rRNA	DRR069325	PRJDB5140	SAMD00059994	38.88	-77.02	Sludge metagenome	Wastewater treatment sludges	Anaerobic digester/reactor	90693	130	0.00143341
NCBI	16S rRNA	DRR069323	PRJDB5140	SAMD00059992	38.88	-77.02	Sludge metagenome	Wastewater treatment sludges	Anaerobic digester/reactor	102792	288	0.00280177
NCBI	16S rRNA	DRR069322	PRJDB5140	SAMD00059991	38.88	-77.02	Sludge metagenome	Wastewater treatment sludges	Anaerobic digester/reactor	83979	193	0.00229819
NCBI	16S rRNA	DRR069321	PRJDB5140	SAMD00059990	38.88	-77.02	Sludge metagenome	Wastewater treatment sludges	Anaerobic digester/reactor	120384	157	0.00130416
NCBI	16S rRNA	DRR069320	PRJDB5140	SAMD00059989	38.88	-77.02	Sludge metagenome	Wastewater treatment sludges	Anaerobic digester/reactor	105432	322	0.0030541
NCBI	16S rRNA	DRR069317	PRJDB5140	SAMD00059986	38.88	-77.02	Sludge metagenome	Wastewater treatment sludges	Anaerobic digester/reactor	91416	138	0.00150958
NCBI	16S rRNA	DRR069316	PRJDB5140	SAMD00059985	38.88	-77.02	Sludge metagenome	Wastewater treatment sludges	Anaerobic digester/reactor	111766	257	0.00229945
NCBI	16S rRNA	DRR069315	PRJDB5140	SAMD00059984	38.88	-77.02	Sludge metagenome	Wastewater treatment sludges	Anaerobic digester/reactor	96971	180	0.00185623
NCBI	16S rRNA	DRR069314	PRJDB5140	SAMD00059983	38.88	-77.02	Sludge metagenome	Wastewater treatment sludges	Anaerobic digester/reactor	122769	189	0.00153948
NCBI	16S rRNA	DRR069313	PRJDB5140	SAMD00059982	38.88	-77.02	Sludge metagenome	Wastewater treatment sludges	Anaerobic digester/reactor	113666	150	0.00131966
NCBI	16S rRNA	DRR069312	PRJDB5140	SAMD00059981	38.88	-77.02	Sludge metagenome	Wastewater treatment sludges	Anaerobic digester/reactor	151221	292	0.00193095
NCBI	16S rRNA	DRR069311	PRJDB5140	SAMD00059980	38.88	-77.02	Sludge metagenome	Wastewater treatment sludges	Anaerobic digester/reactor	105362	183	0.00173687
NCBI	16S rRNA	DRR069309	PRJDB5140	SAMD00059978	38.88	-77.02	Sludge metagenome	Wastewater treatment sludges	Anaerobic digester/reactor	124398	179	0.00143893
NCBI	16S rRNA	DRR069308	PRJDB5140	SAMD00059977	38.88	-77.02	Sludge metagenome	Wastewater treatment sludges	Anaerobic digester/reactor	86807	174	0.00200445
NCBI	16S rRNA	DRR069307	PRJDB5140	SAMD00059976	38.88	-77.02	Sludge metagenome	Wastewater treatment sludges	Anaerobic digester/reactor	102500	330	0.00321951
NCBI	16S rRNA	DRR069306	PRJDB5140	SAMD00059975	38.88	-77.02	Sludge metagenome	Wastewater treatment sludges	Anaerobic digester/reactor	88759	599	0.00674861
NCBI	16S rRNA	DRR069305	PRJDB5140	SAMD00059974	38.88	-77.02	Sludge metagenome	Wastewater treatment sludges	Anaerobic digester/reactor	79247	177	0.00223352
NCBI	16S rRNA	DRR069304	PRJDB5140	SAMD00059973	38.88	-77.02	Sludge metagenome	Wastewater treatment sludges	Anaerobic digester/reactor	94242	453	0.00480677
NCBI	16S rRNA	DRR069303	PRJDB5140	SAMD00059972	38.88	-77.02	Sludge metagenome	Wastewater treatment sludges	Anaerobic digester/reactor	96232	252	0.00261867
NCBI	16S rRNA	DRR069302	PRJDB5140	SAMD00059971	38.88	-77.02	Sludge metagenome	Wastewater treatment sludges	Anaerobic digester/reactor	83328	150	0.00180012
NCBI	16S rRNA	DRR069299	PRJDB5140	SAMD00059968	38.88	-77.02	Sludge metagenome	Wastewater treatment sludges	Anaerobic digester/reactor	80046	162	0.00202384
NCBI	16S rRNA	DRR069297	PRJDB5140	SAMD00059966	38.88	-77.02	Sludge metagenome	Wastewater treatment sludges	Anaerobic digester/reactor	70927	76	0.00107152
NCBI	16S rRNA	DRR069296	PRJDB5140	SAMD00059965	38.88	-77.02	Sludge metagenome	Wastewater treatment sludges	Anaerobic digester/reactor	75466	111	0.00147086
NCBI	16S rRNA	DRR069295	PRJDB5140	SAMD00059964	38.88	-77.02	Sludge metagenome	Wastewater treatment sludges	Anaerobic digester/reactor	78109	106	0.00135708
NCBI	16S rRNA	DRR069294	PRJDB5140	SAMD00059963	38.88	-77.02	Sludge metagenome	Wastewater treatment sludges	Anaerobic digester/reactor	92210	331	0.00358963
NCBI	16S rRNA	DRR069293	PRJDB5140	SAMD00059962	38.88	-77.02	Sludge metagenome	Wastewater treatment sludges	Anaerobic digester/reactor	77291	264	0.00341566
NCBI	16S rRNA	DRR069291	PRJDB5140	SAMD00059960	38.88	-77.02	Sludge metagenome	Wastewater treatment sludges	Anaerobic digester/reactor	102678	564	0.0054929
NCBI	16S rRNA	DRR069288	PRJDB5140	SAMD00059957	38.88	-77.02	Sludge metagenome	Wastewater treatment sludges	Anaerobic digester/reactor	71573	92	0.0012854
NCBI	16S rRNA	DRR069287	PRJDB5140	SAMD00059956	38.88	-77.02	Sludge metagenome	Wastewater treatment sludges	Anaerobic digester/reactor	90087	223	0.00247538
NCBI	16S rRNA	DRR069286	PRJDB5140	SAMD00059955	38.88	-77.02	Sludge metagenome	Wastewater treatment sludges	Anaerobic digester/reactor	71017	283	0.00398496
NCBI	16S rRNA	DRR069285	PRJDB5140	SAMD00059954	38.88	-77.02	Sludge metagenome	Wastewater treatment sludges	Anaerobic digester/reactor	97050	227	0.002339
NCBI	16S rRNA	DRR069284	PRJDB5140	SAMD00059953	38.88	-77.02	Sludge metagenome	Wastewater treatment sludges	Anaerobic digester/reactor	97855	400	0.00408768
NCBI	16S rRNA	DRR069283	PRJDB5140	SAMD00059952	38.88	-77.02	Sludge metagenome	Wastewater treatment sludges	Anaerobic digester/reactor	92982	144	0.00154869
NCBI	16S rRNA	DRR069282	PRJDB5140	SAMD00059951	38.88	-77.02	Sludge metagenome	Wastewater treatment sludges	Anaerobic digester/reactor	109840	988	0.0089949
NCBI	16S rRNA	DRR069281	PRJDB5140	SAMD00059950	38.88	-77.02	Sludge metagenome	Wastewater treatment sludges	Anaerobic digester/reactor	126566	500	0.00395051
NCBI	16S rRNA	DRR069280	PRJDB5140	SAMD00059949	38.88	-77.02	Sludge metagenome	Wastewater treatment sludges	Anaerobic digester/reactor	104540	562	0.00537593
NCBI	16S rRNA	DRR069278	PRJDB5140	SAMD00059947	38.88	-77.02	Sludge metagenome	Wastewater treatment sludges	Anaerobic digester/reactor	125483	280	0.00223138
NCBI	16S rRNA	DRR069277	PRJDB5140	SAMD00059946	38.88	-77.02	Sludge metagenome	Wastewater treatment sludges	Anaerobic digester/reactor	127988	716	0.00559427
NCBI	16S rRNA	DRR069276	PRJDB5140	SAMD00059945	38.88	-77.02	Sludge metagenome	Wastewater treatment sludges	Anaerobic digester/reactor	89578	212	0.00236665
NCBI	16S rRNA	DRR069274	PRJDB5140	SAMD00059943	38.88	-77.02	Sludge metagenome	Wastewater treatment sludges	Anaerobic digester/reactor	58513	179	0.00305915
NCBI	16S rRNA	DRR069272	PRJDB5140	SAMD00059941	38.88	-77.02	Sludge metagenome	Wastewater treatment sludges	Anaerobic digester/reactor	54380	116	0.00213314
NCBI	16S rRNA	DRR069270	PRJDB5140	SAMD00059939	38.88	-77.02	Sludge metagenome	Wastewater treatment sludges	Anaerobic digester/reactor	55347	104	0.00187905
NCBI	16S rRNA	DRR069268	PRJDB5140	SAMD00059937	38.88	-77.02	Sludge metagenome	Wastewater treatment sludges	Anaerobic digester/reactor	55633	151	0.00271422
NCBI	16S rRNA	DRR069266	PRJDB5140	SAMD00059935	38.88	-77.02	Sludge metagenome	Wastewater treatment sludges	Anaerobic digester/reactor	72246	219	0.00303131
NCBI	16S rRNA	DRR069265	PRJDB5140	SAMD00059934	38.88	-77.02	Sludge metagenome	Wastewater treatment sludges	Anaerobic digester/reactor	84178	140	0.00166314
NCBI	16S rRNA	DRR069264	PRJDB5140	SAMD00059933	38.88	-77.02	Sludge metagenome	Wastewater treatment sludges	Anaerobic digester/reactor	49864	51	0.00102278
NCBI	16S rRNA	DRR069263	PRJDB5140	SAMD00059932	38.88	-77.02	Sludge metagenome	Wastewater treatment sludges	Anaerobic digester/reactor	84361	101	0.00119724
NCBI	16S rRNA	DRR069262	PRJDB5140	SAMD00059931	38.88	-77.02	Sludge metagenome	Wastewater treatment sludges	Anaerobic digester/reactor	73024	125	0.00171177
NCBI	16S rRNA	DRR069261	PRJDB5140	SAMD00059930	38.88	-77.02	Sludge metagenome	Wastewater treatment sludges	Anaerobic digester/reactor	70512	122	0.0017302
NCBI	16S rRNA	DRR069259	PRJDB5140	SAMD00059928	38.88	-77.02	Sludge metagenome	Wastewater treatment sludges	Anaerobic digester/reactor	96527	209	0.0021652
NCBI	16S rRNA	DRR069258	PRJDB5140	SAMD00059927	38.88	-77.02	Sludge metagenome	Wastewater treatment sludges	Anaerobic digester/reactor	69424	109	0.00157006
NCBI	16S rRNA	DRR069257	PRJDB5140	SAMD00059926	38.88	-77.02	Sludge metagenome	Wastewater treatment sludges	Anaerobic digester/reactor	159894	221	0.00138217
NCBI	16S rRNA	DRR069256	PRJDB5140	SAMD00059925	38.88	-77.02	Sludge metagenome	Wastewater treatment sludges	Anaerobic digester/reactor	115386	403	0.00349262
NCBI	16S rRNA	DRR069254	PRJDB5140	SAMD00059923	38.88	-77.02	Sludge metagenome	Wastewater treatment sludges	Anaerobic digester/reactor	77898	149	0.00191276
NCBI	16S rRNA	DRR069253	PRJDB5140	SAMD00059922	38.88	-77.02	Sludge metagenome	Wastewater treatment sludges	Anaerobic digester/reactor	88895	197	0.0022161
NCBI	16S rRNA	DRR069252	PRJDB5140	SAMD00059921	38.88	-77.02	Sludge metagenome	Wastewater treatment sludges	Anaerobic digester/reactor	87645	186	0.0021222
NCBI	16S rRNA	DRR069251	PRJDB5140	SAMD00059920	38.88	-77.02	Sludge metagenome	Wastewater treatment sludges	Anaerobic digester/reactor	69582	182	0.00261562
NCBI	16S rRNA	DRR069250	PRJDB5140	SAMD00059919	38.88	-77.02	Sludge metagenome	Wastewater treatment sludges	Anaerobic digester/reactor	92934	205	0.00220587
NCBI	16S rRNA	DRR069249	PRJDB5140	SAMD00059918	38.88	-77.02	Sludge metagenome	Wastewater treatment sludges	Anaerobic digester/reactor	62357	96	0.00153952
NCBI	16S rRNA	DRR069247	PRJDB5140	SAMD00059916	38.88	-77.02	Sludge metagenome	Wastewater treatment sludges	Anaerobic digester/reactor	100108	278	0.002777
NCBI	16S rRNA	DRR069244	PRJDB5140	SAMD00059913	38.88	-77.02	Sludge metagenome	Wastewater treatment sludges	Anaerobic digester/reactor	97153	162	0.00166747
NCBI	16S rRNA	DRR069241	PRJDB5140	SAMD00059910	38.88	-77.02	Sludge metagenome	Wastewater treatment sludges	Anaerobic digester/reactor	125597	181	0.00144112
NCBI	16S rRNA	DRR069239	PRJDB5140	SAMD00059908	38.88	-77.02	Sludge metagenome	Wastewater treatment sludges	Anaerobic digester/reactor	131734	151	0.00114625
NCBI	16S rRNA	DRR069238	PRJDB5140	SAMD00059907	38.88	-77.02	Sludge metagenome	Wastewater treatment sludges	Anaerobic digester/reactor	114359	327	0.00285942
NCBI	16S rRNA	DRR069237	PRJDB5140	SAMD00059906	38.88	-77.02	Sludge metagenome	Wastewater treatment sludges	Anaerobic digester/reactor	128988	208	0.00161255
NCBI	16S rRNA	DRR069234	PRJDB5140	SAMD00059903	38.88	-77.02	Sludge metagenome	Wastewater treatment sludges	Anaerobic digester/reactor	145634	325	0.00223162
NCBI	16S rRNA	DRR069233	PRJDB5140	SAMD00059902	38.88	-77.02	Sludge metagenome	Wastewater treatment sludges	Anaerobic digester/reactor	138510	336	0.00242582
NCBI	16S rRNA	DRR069232	PRJDB5140	SAMD00059901	38.88	-77.02	Sludge metagenome	Wastewater treatment sludges	Anaerobic digester/reactor	136864	163	0.00119096
NCBI	16S rRNA	DRR069231	PRJDB5140	SAMD00059900	38.88	-77.02	Sludge metagenome	Wastewater treatment sludges	Anaerobic digester/reactor	167090	581	0.00347717
NCBI	16S rRNA	DRR069229	PRJDB5140	SAMD00059898	38.88	-77.02	Sludge metagenome	Wastewater treatment sludges	Anaerobic digester/reactor	185412	422	0.00227601
NCBI	16S rRNA	DRR069226	PRJDB5140	SAMD00059895	38.88	-77.02	Sludge metagenome	Wastewater treatment sludges	Anaerobic digester/reactor	110610	169	0.00152789
NCBI	16S rRNA	DRR069225	PRJDB5140	SAMD00059894	38.88	-77.02	Sludge metagenome	Wastewater treatment sludges	Anaerobic digester/reactor	130146	175	0.00134464
NCBI	16S rRNA	DRR069222	PRJDB5140	SAMD00059891	38.88	-77.02	Sludge metagenome	Wastewater treatment sludges	Anaerobic digester/reactor	105617	147	0.00139182
NCBI	16S rRNA	DRR069221	PRJDB5140	SAMD00059890	38.88	-77.02	Sludge metagenome	Wastewater treatment sludges	Anaerobic digester/reactor	145995	233	0.00159595
NCBI	16S rRNA	DRR069220	PRJDB5140	SAMD00059889	38.88	-77.02	Sludge metagenome	Wastewater treatment sludges	Anaerobic digester/reactor	112367	295	0.00262533
NCBI	16S rRNA	DRR069218	PRJDB5140	SAMD00059887	38.88	-77.02	Sludge metagenome	Wastewater treatment sludges	Anaerobic digester/reactor	140425	1283	0.00913655
NCBI	16S rRNA	DRR069216	PRJDB5140	SAMD00059885	38.88	-77.02	Sludge metagenome	Wastewater treatment sludges	Anaerobic digester/reactor	135284	356	0.0026315
NCBI	16S rRNA	DRR069214	PRJDB5140	SAMD00059883	38.88	-77.02	Sludge metagenome	Wastewater treatment sludges	Anaerobic digester/reactor	109035	119	0.00109139
NCBI	16S rRNA	DRR069213	PRJDB5140	SAMD00059882	38.88	-77.02	Sludge metagenome	Wastewater treatment sludges	Anaerobic digester/reactor	110296	114	0.00103358
NCBI	16S rRNA	DRR069210	PRJDB5140	SAMD00059879	38.88	-77.02	Sludge metagenome	Wastewater treatment sludges	Anaerobic digester/reactor	92092	95	0.00103158
NCBI	16S rRNA	DRR069206	PRJDB5140	SAMD00059875	38.88	-77.02	Sludge metagenome	Wastewater treatment sludges	Anaerobic digester/reactor	78370	110	0.0014036
NCBI	16S rRNA	DRR069195	PRJDB5140	SAMD00059864	38.88	-77.02	Sludge metagenome	Wastewater treatment sludges	Anaerobic digester/reactor	89290	212	0.00237429
NCBI	16S rRNA	DRR069194	PRJDB5140	SAMD00059863	38.88	-77.02	Sludge metagenome	Wastewater treatment sludges	Anaerobic digester/reactor	114940	120	0.00104402
NCBI	16S rRNA	DRR069192	PRJDB5140	SAMD00059861	38.88	-77.02	Sludge metagenome	Wastewater treatment sludges	Anaerobic digester/reactor	92880	184	0.00198105
NCBI	16S rRNA	DRR069190	PRJDB5140	SAMD00059859	38.88	-77.02	Sludge metagenome	Wastewater treatment sludges	Anaerobic digester/reactor	86970	111	0.0012763
NCBI	16S rRNA	DRR069187	PRJDB5140	SAMD00059856	38.88	-77.02	Sludge metagenome	Wastewater treatment sludges	Anaerobic digester/reactor	103170	198	0.00191916
NCBI	16S rRNA	DRR069186	PRJDB5140	SAMD00059855	38.88	-77.02	Sludge metagenome	Wastewater treatment sludges	Anaerobic digester/reactor	91547	462	0.00504659
NCBI	16S rRNA	DRR069184	PRJDB5140	SAMD00059853	38.88	-77.02	Sludge metagenome	Wastewater treatment sludges	Anaerobic digester/reactor	126016	268	0.00212671
NCBI	16S rRNA	DRR069183	PRJDB5140	SAMD00059852	38.88	-77.02	Sludge metagenome	Wastewater treatment sludges	Anaerobic digester/reactor	87427	98	0.00112094
NCBI	16S rRNA	DRR069179	PRJDB5140	SAMD00059848	38.88	-77.02	Sludge metagenome	Wastewater treatment sludges	Anaerobic digester/reactor	112565	162	0.00143917
NCBI	16S rRNA	DRR069178	PRJDB5140	SAMD00059847	38.88	-77.02	Sludge metagenome	Wastewater treatment sludges	Anaerobic digester/reactor	123752	148	0.00119594
NCBI	16S rRNA	DRR069175	PRJDB5140	SAMD00059844	38.88	-77.02	Sludge metagenome	Wastewater treatment sludges	Anaerobic digester/reactor	133460	206	0.00154353
NCBI	16S rRNA	DRR069173	PRJDB5140	SAMD00059842	38.88	-77.02	Sludge metagenome	Wastewater treatment sludges	Anaerobic digester/reactor	81105	111	0.0013686
NCBI	16S rRNA	DRR069172	PRJDB5140	SAMD00059841	38.88	-77.02	Sludge metagenome	Wastewater treatment sludges	Anaerobic digester/reactor	148982	511	0.00342994
NCBI	16S rRNA	DRR069171	PRJDB5140	SAMD00059840	38.88	-77.02	Sludge metagenome	Wastewater treatment sludges	Anaerobic digester/reactor	194528	571	0.00293531
NCBI	16S rRNA	DRR069169	PRJDB5140	SAMD00059838	38.88	-77.02	Sludge metagenome	Wastewater treatment sludges	Anaerobic digester/reactor	199355	221	0.00110858
NCBI	16S rRNA	DRR069167	PRJDB5140	SAMD00059836	38.88	-77.02	Sludge metagenome	Wastewater treatment sludges	Anaerobic digester/reactor	104335	147	0.00140892
NCBI	16S rRNA	DRR069163	PRJDB5140	SAMD00059832	38.88	-77.02	Sludge metagenome	Wastewater treatment sludges	Anaerobic digester/reactor	101977	115	0.00112771
NCBI	16S rRNA	DRR069160	PRJDB5140	SAMD00059829	38.88	-77.02	Sludge metagenome	Wastewater treatment sludges	Anaerobic digester/reactor	109047	109	0.000999569
NCBI	16S rRNA	DRR069158	PRJDB5140	SAMD00059827	38.88	-77.02	Sludge metagenome	Wastewater treatment sludges	Anaerobic digester/reactor	113368	211	0.0018612
NCBI	16S rRNA	DRR069156	PRJDB5140	SAMD00059825	38.88	-77.02	Sludge metagenome	Wastewater treatment sludges	Anaerobic digester/reactor	101438	124	0.00122242
NCBI	16S rRNA	DRR069154	PRJDB5140	SAMD00059823	38.88	-77.02	Sludge metagenome	Wastewater treatment sludges	Anaerobic digester/reactor	83178	206	0.00247662
NCBI	16S rRNA	DRR069153	PRJDB5140	SAMD00059822	38.88	-77.02	Sludge metagenome	Wastewater treatment sludges	Anaerobic digester/reactor	96737	151	0.00156093
NCBI	16S rRNA	DRR069152	PRJDB5140	SAMD00059821	38.88	-77.02	Sludge metagenome	Wastewater treatment sludges	Anaerobic digester/reactor	90159	122	0.00135316
NCBI	16S rRNA	DRR069151	PRJDB5140	SAMD00059820	38.88	-77.02	Sludge metagenome	Wastewater treatment sludges	Anaerobic digester/reactor	91039	165	0.00181241
NCBI	16S rRNA	DRR069150	PRJDB5140	SAMD00059819	38.88	-77.02	Sludge metagenome	Wastewater treatment sludges	Anaerobic digester/reactor	76724	322	0.00419686
NCBI	16S rRNA	DRR069149	PRJDB5140	SAMD00059818	38.88	-77.02	Sludge metagenome	Wastewater treatment sludges	Anaerobic digester/reactor	89086	109	0.00122354
NCBI	16S rRNA	DRR069148	PRJDB5140	SAMD00059817	38.88	-77.02	Sludge metagenome	Wastewater treatment sludges	Anaerobic digester/reactor	86735	179	0.00206376
NCBI	16S rRNA	DRR069147	PRJDB5140	SAMD00059816	38.88	-77.02	Sludge metagenome	Wastewater treatment sludges	Anaerobic digester/reactor	94644	115	0.00121508
NCBI	16S rRNA	DRR069145	PRJDB5140	SAMD00059814	38.88	-77.02	Sludge metagenome	Wastewater treatment sludges	Anaerobic digester/reactor	86889	122	0.00140409
NCBI	16S rRNA	DRR069144	PRJDB5140	SAMD00059813	38.88	-77.02	Sludge metagenome	Wastewater treatment sludges	Anaerobic digester/reactor	89021	270	0.00303299
NCBI	16S rRNA	DRR069140	PRJDB5140	SAMD00059809	38.88	-77.02	Sludge metagenome	Wastewater treatment sludges	Anaerobic digester/reactor	116111	824	0.00709666
NCBI	16S rRNA	DRR069138	PRJDB5140	SAMD00059807	38.88	-77.02	Sludge metagenome	Wastewater treatment sludges	Anaerobic digester/reactor	99495	444	0.00446254
NCBI	16S rRNA	DRR069136	PRJDB5140	SAMD00059805	38.88	-77.02	Sludge metagenome	Wastewater treatment sludges	Anaerobic digester/reactor	76012	77	0.001013
NCBI	16S rRNA	DRR069135	PRJDB5140	SAMD00059804	38.88	-77.02	Sludge metagenome	Wastewater treatment sludges	Anaerobic digester/reactor	87123	136	0.00156101
NCBI	16S rRNA	DRR069134	PRJDB5140	SAMD00059803	38.88	-77.02	Sludge metagenome	Wastewater treatment sludges	Anaerobic digester/reactor	94805	257	0.00271083
NCBI	16S rRNA	DRR069133	PRJDB5140	SAMD00059802	38.88	-77.02	Sludge metagenome	Wastewater treatment sludges	Anaerobic digester/reactor	104007	115	0.00110569
NCBI	16S rRNA	DRR069132	PRJDB5140	SAMD00059801	38.88	-77.02	Sludge metagenome	Wastewater treatment sludges	Anaerobic digester/reactor	96628	167	0.00172828
NCBI	16S rRNA	DRR069130	PRJDB5140	SAMD00059799	38.88	-77.02	Sludge metagenome	Wastewater treatment sludges	Anaerobic digester/reactor	97924	209	0.00213431
NCBI	16S rRNA	DRR069127	PRJDB5140	SAMD00059796	38.88	-77.02	Sludge metagenome	Wastewater treatment sludges	Anaerobic digester/reactor	97877	171	0.00174709
NCBI	16S rRNA	DRR069125	PRJDB5140	SAMD00059794	38.88	-77.02	Sludge metagenome	Wastewater treatment sludges	Anaerobic digester/reactor	102511	238	0.0023217
NCBI	16S rRNA	DRR069123	PRJDB5140	SAMD00059792	38.88	-77.02	Sludge metagenome	Wastewater treatment sludges	Anaerobic digester/reactor	113354	246	0.00217019
NCBI	16S rRNA	DRR069122	PRJDB5140	SAMD00059791	38.88	-77.02	Sludge metagenome	Wastewater treatment sludges	Anaerobic digester/reactor	104517	240	0.00229628
NCBI	16S rRNA	DRR069121	PRJDB5140	SAMD00059790	38.88	-77.02	Sludge metagenome	Wastewater treatment sludges	Anaerobic digester/reactor	148976	177	0.00118811
NCBI	16S rRNA	DRR069120	PRJDB5140	SAMD00059789	38.88	-77.02	Sludge metagenome	Wastewater treatment sludges	Anaerobic digester/reactor	90360	123	0.00136122
NCBI	16S rRNA	DRR069118	PRJDB5140	SAMD00059787	38.88	-77.02	Sludge metagenome	Wastewater treatment sludges	Anaerobic digester/reactor	91239	140	0.00153443
NCBI	16S rRNA	DRR069117	PRJDB5140	SAMD00059786	38.88	-77.02	Sludge metagenome	Wastewater treatment sludges	Anaerobic digester/reactor	92664	165	0.00178063
NCBI	16S rRNA	DRR069116	PRJDB5140	SAMD00059785	38.88	-77.02	Sludge metagenome	Wastewater treatment sludges	Anaerobic digester/reactor	100346	102	0.00101648
NCBI	16S rRNA	DRR069115	PRJDB5140	SAMD00059784	38.88	-77.02	Sludge metagenome	Wastewater treatment sludges	Anaerobic digester/reactor	102637	194	0.00189016
NCBI	16S rRNA	DRR069114	PRJDB5140	SAMD00059783	38.88	-77.02	Sludge metagenome	Wastewater treatment sludges	Anaerobic digester/reactor	89464	297	0.00331977
NCBI	16S rRNA	DRR069113	PRJDB5140	SAMD00059782	38.88	-77.02	Sludge metagenome	Wastewater treatment sludges	Anaerobic digester/reactor	85821	243	0.00283147
NCBI	16S rRNA	DRR069112	PRJDB5140	SAMD00059781	38.88	-77.02	Sludge metagenome	Wastewater treatment sludges	Anaerobic digester/reactor	106877	285	0.00266662
NCBI	16S rRNA	DRR069110	PRJDB5140	SAMD00059779	38.88	-77.02	Sludge metagenome	Wastewater treatment sludges	Anaerobic digester/reactor	96882	128	0.00132119
NCBI	16S rRNA	DRR069109	PRJDB5140	SAMD00059778	38.88	-77.02	Sludge metagenome	Wastewater treatment sludges	Anaerobic digester/reactor	95774	224	0.00233884
NCBI	16S rRNA	DRR069107	PRJDB5140	SAMD00059776	38.88	-77.02	Sludge metagenome	Wastewater treatment sludges	Anaerobic digester/reactor	79015	247	0.00312599
NCBI	16S rRNA	DRR069106	PRJDB5140	SAMD00059775	38.88	-77.02	Sludge metagenome	Wastewater treatment sludges	Anaerobic digester/reactor	87735	125	0.00142474
NCBI	16S rRNA	DRR069105	PRJDB5140	SAMD00059774	38.88	-77.02	Sludge metagenome	Wastewater treatment sludges	Anaerobic digester/reactor	78255	154	0.00196793
NCBI	16S rRNA	DRR069104	PRJDB5140	SAMD00059773	38.88	-77.02	Sludge metagenome	Wastewater treatment sludges	Anaerobic digester/reactor	94909	132	0.00139081
NCBI	16S rRNA	DRR069103	PRJDB5140	SAMD00059772	38.88	-77.02	Sludge metagenome	Wastewater treatment sludges	Anaerobic digester/reactor	112364	242	0.00215371
NCBI	16S rRNA	DRR069102	PRJDB5140	SAMD00059771	38.88	-77.02	Sludge metagenome	Wastewater treatment sludges	Anaerobic digester/reactor	93831	220	0.00234464
NCBI	16S rRNA	DRR069101	PRJDB5140	SAMD00059770	38.88	-77.02	Sludge metagenome	Wastewater treatment sludges	Anaerobic digester/reactor	105254	136	0.00129211
NCBI	16S rRNA	DRR069100	PRJDB5140	SAMD00059769	38.88	-77.02	Sludge metagenome	Wastewater treatment sludges	Anaerobic digester/reactor	75816	127	0.00167511
NCBI	16S rRNA	DRR069099	PRJDB5140	SAMD00059768	38.88	-77.02	Sludge metagenome	Wastewater treatment sludges	Anaerobic digester/reactor	85815	114	0.00132844
NCBI	16S rRNA	DRR069098	PRJDB5140	SAMD00059767	38.88	-77.02	Sludge metagenome	Wastewater treatment sludges	Anaerobic digester/reactor	86036	150	0.00174346
NCBI	16S rRNA	DRR069096	PRJDB5140	SAMD00059765	38.88	-77.02	Sludge metagenome	Wastewater treatment sludges	Anaerobic digester/reactor	70859	234	0.00330233
NCBI	16S rRNA	DRR033797	PRJDB3862	SAMD00029058	37.4231	138.778	Uncultured microorganism	Anaerobic sludge	Anaerobic digester/reactor	26202	53	0.00202275
NCBI	16S rRNA	DRR033796	PRJDB3862	SAMD00029057	37.4231	138.778	Uncultured microorganism	Anaerobic sludge	Anaerobic digester/reactor	23978	71	0.00296105
NCBI	16S rRNA	DRR022253	PRJDB3061	SAMD00019201	35.9747	139.509	Uncultured organism	Paddy field (water)	Freshwater/sediment	22604	119	0.00526455
NCBI	16S rRNA	DRR021369	PRJDB2923	SAMD00012173	N.A.	N.A.	Anaerobic digester metagenome	Methane fermentation reactor	Anaerobic digester/reactor	136813	377	0.00275559
JGI	MAG	GCA_011367855.1	PRJNA480137	SAMN09639658	40.71	-119.37	Candidatus Methanomethylicus sp.	Great boiling spring, nevada	Hot spring/sediment
JGI	MAG	GCA_011364145.1	PRJNA480137	SAMN09639776	25.44	98.46	Candidatus Methanomethylicus sp.	Hot spring sediment	Hot spring/sediment
JGI	MAG	GCA_011362965.1	PRJNA480137	SAMN09639891	40.71	-119.37	Candidatus Methanomethylicus sp.	Great boiling spring, nevada	Hot spring/sediment
JGI	MAG	GCA_011337955.1	PRJNA480137	SAMN09640100	44.61	-110.44	Candidatus Methanomethylicus sp.	Mud, sediment	Hot spring/sediment
JGI	MAG	GCA_011337945.1	PRJNA480137	SAMN09640069	40.71	-119.37	Candidatus Methanomethylicus sp.	Great boiling spring, nevada	Hot spring/sediment
NCBI	MAG	GCA_011042155.1	PRJNA480137	SAMN09638329	27.01	-111.41	Candidatus Methanomethylia archaeon	Marine hydrothermal sediment	Hydrothermal vent
NCBI	MAG	GCA_003650625.1	PRJNA362212	SAMN09214982	29.52	-113.57	Candidatus Verstraetearchaeota archaeon	Deep-sea hydrothermal vent sediments from dive 4569_2 depth 12-15 cm	Hydrothermal vent
NCBI	MAG	GCA_003649155.1	PRJNA362212	SAMN09215088	27.02	-111.38	Candidatus Verstraetearchaeota archaeon	Deep-sea hydrothermal vent sediments from dive 4569_9 depth 9-12 cm	Hydrothermal vent
NCBI	MAG	GCA_003649085.1	PRJNA362212	SAMN09214983	29.52	-113.57	Candidatus Verstraetearchaeota archaeon	Deep-sea hydrothermal vent sediments from dive 4569_2 depth 12-15 cm	Hydrothermal vent
NCBI	MAG	GCA_003649145.1	PRJNA362212	SAMN09215027	29.52	-113.57	Candidatus Verstraetearchaeota archaeon	Deep-sea hydrothermal vent sediments from dive 4569_2 depth 12-15 cm	Hydrothermal vent
NCBI	MAG	GCA_003649095.1	PRJNA362212	SAMN09215029	29.52	-113.57	Candidatus Verstraetearchaeota archaeon	Deep-sea hydrothermal vent sediments from dive 4569_2 depth 12-15 cm	Hydrothermal vent
NCBI	MAG	GCA_003649105.1	PRJNA362212	SAMN09215028	29.52	-113.57	Candidatus Verstraetearchaeota archaeon	Deep-sea hydrothermal vent sediments from dive 4569_2 depth 12-15 cm	Hydrothermal vent
NCBI	MAG	GCA_001717085.1	PRJNA321438	SAMN04994464	-27.47	153.02	Candidatus Methanosuratus petracarbonis	Formation water coalbed methane wells	Groundwater
NCBI	MAG	GCA_004028775.1	PRJNA414521	SAMN10531977	58.06	82.83	Candidatus Methanosuratus subterraneum	2.8-km deep subsurface aquifer	Groundwater
NCBI	MAG	GCA_001717035.1	PRJNA321438	SAMN04994459	-27.47	153.02	Candidatus Methanomethylicus mesodigestum	Palm oil mill effluent degrading anaerobic digester	Anaerobic digester/reactor
JGI	MAG	GCA_011329225.1	PRJNA480137	SAMN09639567	49.95	-116.52	Candidatus Methanomethylicus mesodigestum	Hot spring sediment	Hot spring/sediment
NCBI	MAG	GCA_002507395.1	PRJNA348753	SAMN06027463	N.A.	N.A.	Candidatus Verstraetearchaeota archaeon	Closed biodigester	Anaerobic digester/reactor
NCBI	MAG	GCA_002504985.1	PRJNA348753	SAMN06027504	N.A.	N.A.	Candidatus Verstraetearchaeota archaeon	Waste water	Anaerobic digester/reactor
NCBI	MAG	GCA_015660995.1	PRJNA443582	SAMN15670604	47.5	-93.48	Candidatus Methanomethyliaceae archaeon	Peatland	Freshwater/sediment
NCBI	MAG	GCA_014361455.1	PRJNA635524	SAMN15637552	38.15	118.5	Candidatus Methanosuratus sp.	Shengli oilfield at shandong province	Petroleum field
NCBI	MAG	GCA_011605825.1	PRJNA604268	SAMN13964309	44.42	-110.96	Candidatus Verstraetearchaeota archaeon	Sediments from hot spring shelf	Hot spring/sediment
NCBI	MAG	GCA_014361425.1	PRJNA635524	SAMN15637551	38.15	118.5	Candidatus Methanosuratus sp.	Shengli oilfield at shandong province	Petroleum field
NCBI	MAG	GCA_016882195.1	PRJNA523022	SAMN10966563	-6.26	29.51	Candidatus Verstraetearchaeota archaeon	Freshwater lake	Freshwater/sediment
NCBI	MAG	GCA_011605805.1	PRJNA604268	SAMN13964310	44.42	-110.96	Candidatus Verstraetearchaeota archaeon	Sediments from hot spring shelf	Hot spring/sediment
NCBI	MAG	GCA_004212145.1	PRJNA472146	SAMN10390735	44.76	-110.44	Candidatus Verstraetearchaeota archaeon	Yellowstone sulfidic hot spring sediment	Hot spring/sediment
NCBI	MAG	GCA_004348015.1	PRJNA475886	SAMN09405039	44.38	-110.69	Candidatus Verstraetearchaeota archaeon	Hot springs sediment	Hot spring/sediment
NCBI	MAG	GCA_014361445.1	PRJNA635524	SAMN15637553	38.15	118.5	Candidatus Methanomethyliales bacterium	Shengli oilfield at shandong province	Petroleum field
NCBI	MAG	GCA_001717025.1	PRJNA321438	SAMN04994460	-27.47	153.02	Candidatus Methanomethylicus oleusabulum	Iso-alkane degrading methanogenic enrichment culture from athabasca tailings sands	Anaerobic digester/reactor
NCBI	MAG	GCA_001717005.1	PRJNA321438	SAMN04994458	-27.47	153.02	Candidatus Methanomethylicus mesodigestum	Cellulose-degrading anaerobic digester	Anaerobic digester/reactor
JGI	MAG	GCA_011373925.1	PRJNA480137	SAMN09638938	44.61	-110.44	Candidatus Methanosuratus petracarbonis	Mud, sediment	Hot spring/sediment
NCBI	MAG	GCA_003649185.1	PRJNA362212	SAMN09214981	29.52	-113.57	Candidatus Verstraetearchaeota archaeon	Deep-sea hydrothermal vent sediments from dive 4569_2 depth 12-15 cm	Hydrothermal vent
NCBI	MAG	GCA_011605765.1	PRJNA604268	SAMN13964311	44.42	-110.96	Candidatus Verstraetearchaeota archaeon	Sediments from hot spring shelf	Hot spring/sediment
NCBI	MAG	GCA_004347955.1	PRJNA475886	SAMN09405038	44.38	-110.69	Candidatus Verstraetearchaeota archaeon	Sediment	Hot spring/sediment
NCBI	MAG	GCA_011605835.1	PRJNA604268	SAMN13964308	44.42	-110.96	Candidatus Verstraetearchaeota archaeon	Sediments from hot spring shelf	Hot spring/sediment
JGI	MAG	Ga0254950	Gp0212717	Gs0128960	44.43	-110.59	Unclassified archaeon obs3_genome_054 obs3_genome_054	Hot spring sediment，obsidian pool, yellowstone	Hot spring/sediment
JGI	MAG	Ga0254904	Gp0212715	Gs0128960	44.43	-110.59	Unclassified archaeon obs2_genome_008 obs2_genome_008	Hot spring sediment，obsidian pool, yellowstone	Hot spring/sediment
JGI	MAG	Ga0180368	Gp0206485	Gs0127627	24.95	98.44	Unclassfied Crenarchaeota jz bin_38	Hot spring sediment	Hot spring/sediment
JGI	MAG	Ga0180367	Gp0206485	Gs0127627	24.95	98.44	Unclassfied Crenarchaeota jz bin_37	Hot spring sediment	Hot spring/sediment
JGI	MAG	Ga0181710	Gp0206485	Gs0127627	24.95	98.44	Unclassified archaeon jz bin_30	Hot spring sediment	Hot spring/sediment
JGI	MAG	Ga0263249	Gp0266519	Gs0127627	24.95	98.44	Unclassified verstraetearchaeota jz-2 bin_200	Hot spring sediment	Hot spring/sediment
JGI	MAG	Ga0263252	Gp0304151	Gs0127627	24.95	98.44	Unclassified verstraetearchaeota jz-3 bin_106	Hot spring sediment	Hot spring/sediment
JGI	MAG	Ga0263255	Gp0304151	Gs0127627	24.95	98.44	Unclassified verstraetearchaeota jz-3 bin_107	Hot spring sediment	Hot spring/sediment
JGI	MAG	Ga0263253	Gp0304155	Gs0127627	24.95	98.44	Unclassified verstraetearchaeota gmqp bin_44	Hot spring sediment	Hot spring/sediment
JGI	MAG	Ga0263254	Gp0266521	Gs0127627	24.95	98.44	Unclassified verstraetearchaeota drty-6 bin_144	Hot spring sediment	Hot spring/sediment
JGI	MAG	GCA_011364485.1	PRJNA480137	SAMN09639740	25.44	98.46	Candidatus Methanomethyliaceae archaeon	Hot spring sediment	Hot spring/sediment
NCBI	MAG	GCA_001717015.1	PRJNA321438	SAMN04994464	-27.47	153.02	Candidatus Methanosuratus petracarbonis	Formation water coalbed methane wells	Groundwater
NCBI	MAG	GCA_025057955.1	PRJNA761511	SAMN30304962	4	101.39	Candidatus Methanomethyliaceae archaeon	Brown biofilm from alkaline hot spring	Hot spring/sediment
NCBI	MAG	GCA_024461155.1	PRJNA859922	SAMN29851763	44.57	-110.8	Candidatus Methanomethylicia archaeon	Hot spring sediment	Hot spring/sediment
NCBI	MAG	GCA_024461175.1	PRJNA859922	SAMN29878106	44.58	-110.79	Candidatus Methanomethylicia archaeon	Hot spring sediment	Hot spring/sediment
NCBI	MAG	GCA_024461335.1	PRJNA859922	SAMN29877790	44.57	-110.81	Candidatus Methanomethylicia archaeon	Hot spring sediment	Hot spring/sediment
NCBI	MAG	GCA_024464205.1	PRJNA859922	SAMN29877625	44.57	-110.81	Candidatus Methanomethylicia archaeon	Hot spring sediment	Hot spring/sediment
NCBI	MAG	GCA_024464255.1	PRJNA859922	SAMN29851525	44.57	-110.8	Candidatus Methanomethylicia archaeon	Hot spring sediment	Hot spring/sediment
NCBI	MAG	GCA_025058215.1	PRJNA761511	SAMN30304959	4	101.39	Candidatus Methanomethylicia archaeon	Brown biofilm from alkaline hot spring	Hot spring/sediment
NCBI	MAG	GCA_022839705.1	PRJNA818325	SAMN26856837	35.15	128.1	Candidatus Methanomethylicus mesodigestus	Anaerobic digesters	Anaerobic digester/reactor
NCBI	MAG	GCA_024518645.1	PRJNA859922	SAMN29877776	44.57	-110.81	Candidatus Methanosuratincola sp.	Hot spring sediment	Hot spring/sediment
NCBI	MAG	GCA_020832905.1	PRJNA568220	SAMN18938197	44.69	-110.73	Candidatus Verstraetearchaeota archaeon	Sediments from shelf	Hot spring/sediment
NCBI	MAG	GCA_020833005.1	PRJNA568220	SAMN18938194	44.69	-110.73	Candidatus Verstraetearchaeota archaeon	Sediments from shelf	Hot spring/sediment
NCBI	MAG	GCA_020833355.1	PRJNA568220	SAMN18938176	44.69	-110.73	Candidatus Verstraetearchaeota archaeon	Sediments from shelf	Hot spring/sediment
NCBI	MAG	GCA_021158885.1	PRJNA713414	SAMN18353527	23.96	-108.86	Candidatus Verstraetearchaeota archaeon	Marine hydrothermal sediment	Hydrothermal vent
NCBI	MAG	GCA_021160575.1	PRJNA713414	SAMN18353773	23.96	-108.86	Candidatus Verstraetearchaeota archaeon	Marine hydrothermal sediment	Hydrothermal vent

## Sheet: Supplementary Table 6
Supplementary Table 6. Primers and probes used in this study.
Name	Sequence (5’ to 3’)	Specificity / Memo	Reference
519F	CAGCMGCCGCGGTAANWC	Bacteria	(Lane, D., 1991)
907R	CCGTCAATTCMTTTRAGTT	Bacteria	(Lane, D., 1991)
mcrA4F	ATGCCGACAATAGTAGCCAT	LWZ-6	This study
mcrA4R	CATGTAGCTGCCGAACCAGA	LWZ-6	This study
MSR4F	TCTCTGGTTAAACCTCAAGGCTC	LWZ-6	This study
MSR4R	TCCCCTGGCTTTCGTCCCTC	LWZ-6	This study
ZC2F	CAAGAGCCCGGAGTTGGATT	Methanoculleus	This study
ZC2R	ACGGTTGAGCCGTCAGATTT	Methanoculleus	This study
341F	CCTAYGGGRBGCASCAG	16S rRNA gene amplicon sequencing	(Klindworth, A. et al. , 2012)
806R	GGACTACNNGGGTATCTAAT	16S rRNA gene amplicon sequencing	(Klindworth, A. et al. , 2012)
515FmodF	GTGYCAGCMGCCGCGGTAA	16S rRNA gene amplicon sequencing	(Caporaso, J. G. et al, 2011)
806RmodR	GGACTACNVGGGTWTCTAAT-3	16S rRNA gene amplicon sequencing	(Caporaso, J. G. et al, 2011)
Arch519F	CAGCCGCCGCGGTAA	16S rRNA gene amplicon sequencing	(Stahl, D. A., 1991)
Arch915R	GTGCTCCCCCGCCAATTCCT	16S rRNA gene amplicon sequencing	(Stahl, D. A., 1991)
EUB-338	GCTGCCTCCGTAGGAGT	CARD-FISH	(Daims, H., 1999)
ARCH-915	GTGCTCCCCCGCCAATCCCT	CARD-FISH	(Stahl, D. A., 1991)
References
Lane, D. 16S/23S rRNA sequencing. Nucleic acid techniques in bacterial systematics, 115-175 (1991).
Klindworth, A. et al. Evaluation of general 16S ribosomal RNA gene PCR primers for classical and next-generation sequencing-based diversity studies. Nucleic Acids Res. 41, e1-e1 (2012).
Caporaso, J. G. et al. Global patterns of 16S rRNA diversity at a depth of millions of sequences per sample. P. Natl. Acad. Sci. USA 108, 4516-4522 (2011).
Wei, S. et al. Comparative evaluation of three archaeal primer pairs for exploring archaeal communities in deep-sea sediments and permafrost soils. Extremophiles 23, 747-757 (2019).
Stahl, D. A. Development and application of nucleic acid probes. Nucleic acid techniques in bacterial systematics, 205-248 (1991).
[truncated: 1 more rows]

## Sheet: Supplementary Table 7
Supplementary Table 7. Summary of sequencing data submitted to The National Omics Data Encyclopedia (NODE).
[truncated: 40 more rows]
